# Supplementary material for: Functional lncRNA-miRNA-mRNA networks in rabbit carotid atherosclerosis
Source: publisher site journal article supplement (doi:10.18632/aging.102778), 2020-02-11
Supplement: Supplementary file [file aging-v12i3-102778-supplementary-material-SD1.pdf]

## **SUPPLEMENTARY TABLES**

Please browse Full Text version to see the data of Supplementary Tables 1–7

**Supplementary Table 1. Significantly DE lncRNA transcripts between AS and control rabbits.**

**Supplementary Table 2. Significantly DE miRNA transcripts between AS and control rabbits.**

**Supplementary Table 3. Significantly DE mRNA transcripts between AS and control rabbits.**

**Supplementary Table 4. lncRNA-miRNA and miRNA-mRNA interaction pairs.**

**Supplementary Table 5. GO enrichment analysis of the lncRNA-miRNA-mRNA-targeted genes.**

**Supplementary Table 6. KEGG enrichment analysis of the lncRNA-miRNA-mRNA-targeted genes.**

**Supplementary Table 7. The lncRNA-miRNA-mRNA network. lncRNA (up in AS rabbits)-miRNA (down in AS rabbits)-mRNA (up in AS rabbits).**
