# Supplementary material for: Functional lncRNA-miRNA-mRNA networks in rabbit carotid atherosclerosis
Source: Aging (Albany NY). 2020 Feb 11;12(3):2798–813. doi: 10.18632/aging.102778 (PMC7041763; doi:10.18632/aging.102778)
Supplement: Supplementary Table 1 [file aging-12-102778-s006..xls]

## Sheet: Sheet1
Supplementary Table 1. Significantly DE lncRNA transcripts between AS and control rabbits.
transcript_id	gene_id	gene_name	gene_location	AS_FPKM	Control_FPKM	log2(foldchange)	pvalue	qvalue	Status	Target_prediction_method	Target_gene_id	Target_official_symbol	Target_description	Target_GO_id	Target_GO_description	Target_KO_id	Target_KO_description
LNC_001437	XLOC_069865	-	GL018901:510515-516695	1.78294	13.6978	-2.94161	5e-05	0.00164462	Novel_lncRNA	co_location	ENSOCUG00000006973	ADGRE2	adhesion G protein-coupled receptor E2 [Source:HGNC Symbol;Acc:HGNC:3337]	GO:0005488,GO:0035374,GO:0005509,GO:0006935,GO:0042330,GO:0002376,GO:0060326,GO:0009605,GO:0044464,GO:0005623,GO:0005575,GO:0005539,GO:0044459,GO:0097367,GO:0040011,GO:0046872,GO:0016477,GO:0043169,GO:0043168,GO:0006928,GO:0043167,GO:0031256,GO:0070887,GO:0071621,GO:0048870,GO:0051674,GO:0031252,GO:1901681,GO:0071944,GO:0030595,GO:0016020,GO:0003674,GO:0050789,GO:0044425,GO:0050900,GO:0042221,GO:…	binding,chondroitin sulfate binding,calcium ion binding,chemotaxis,taxis,immune system process,cell chemotaxis,response to external stimulus,cell part,cell,cellular_component,glycosaminoglycan binding,plasma membrane part,carbohydrate derivative binding,locomotion,metal ion binding,cell migration,cation binding,anion binding,cellular component movement,ion binding,leading edge membrane,cellular r…	--	--
LNC_001325	XLOC_065554	-	GL018764:170195-171220	0	4.80375	#NAME?	5e-05	0.00164462	Novel_lncRNA	co_location	ENSOCUG00000000944	PLPP7	phospholipid phosphatase 7 (inactive) [Source:HGNC Symbol;Acc:HGNC:28174]	GO:0044446,GO:0044422,GO:0048519,GO:0048523,GO:2000026,GO:0044424,GO:0051239,GO:0043231,GO:0005622,GO:0010832,GO:2001015,GO:0043229,GO:0051154,GO:0005634,GO:0043227,GO:0044464,GO:0005623,GO:0048741,GO:0050793,GO:0005575,GO:0048747,GO:0010830,GO:0032502,GO:0043226,GO:0045595,GO:2001014,GO:0051148,GO:0044767,GO:0055002,GO:0051093,GO:0007275,GO:0055001,GO:0048513,GO:0014902,GO:0045596,GO:0060284,GO:…	intracellular organelle part,organelle part,negative regulation of biological process,negative regulation of cellular process,regulation of multicellular organismal development,intracellular part,regulation of multicellular organismal process,intracellular membrane-bounded organelle,intracellular,negative regulation of myotube differentiation,negative regulation of skeletal muscle cell differenti…	--	--
LNC_001328	XLOC_065631	-	GL018765:558169-562504	22.8717	4.32934	2.40135	5e-05	0.00164462	Novel_lncRNA	co_location	ENSOCUG00000017663	CLIP2	CAP-Gly domain containing linker protein 2 [Source:HGNC Symbol;Acc:HGNC:2586]	GO:0005515,GO:0005488,GO:0044446,GO:0044422,GO:0032991,GO:0043228,GO:0043232,GO:0044424,GO:0051010,GO:0005622,GO:0035371,GO:0043234,GO:0043229,GO:0044464,GO:0005623,GO:0005575,GO:0015631,GO:0043226,GO:0005881,GO:0008017,GO:0005874,GO:0044430,GO:0008092,GO:0044444,GO:0003674,GO:0015630,GO:0005737,GO:0005856	protein binding,binding,intracellular organelle part,organelle part,macromolecular complex,non-membrane-bounded organelle,intracellular non-membrane-bounded organelle,intracellular part,microtubule plus-end binding,intracellular,microtubule plus end,protein complex,intracellular organelle,cell part,cell,cellular_component,tubulin binding,organelle,cytoplasmic microtubule,microtubule binding,micro…	--	--
LNC_000364	XLOC_017465	-	14:14623084-14659206	0	5.86819	#NAME?	0.0011	0.0192252	Novel_lncRNA	co_expression	ENSOCUG00000006864	--	--	GO:0050896,GO:0051716,GO:0050794,GO:0007166,GO:0044763,GO:0044699,GO:0004888,GO:0007165,GO:0050789,GO:0038023,GO:0065007,GO:0004872,GO:0004871,GO:0060089,GO:0007154,GO:0023052,GO:0044700,GO:0009987,GO:0008150,GO:0005575,GO:0016021,GO:0003674,GO:0031224,GO:0044425,GO:0016020	response to stimulus,cellular response to stimulus,regulation of cellular process,cell surface receptor signaling pathway,single-organism cellular process,single-organism process,transmembrane signaling receptor activity,signal transduction,regulation of biological process,signaling receptor activity,biological regulation,receptor activity,signal transducer activity,molecular transducer activity,…	ocu04640,ocu05162,ocu05340,ocu04660,ocu05142,ocu05166	Hematopoietic cell lineage,Measles,Primary immunodeficiency,T cell receptor signaling pathway,Chagas disease (American trypanosomiasis),HTLV-I infection
LNC_001282	XLOC_063983	-	GL018737:1965731-1974503	2.52597	0.0725166	5.12239	0.0002	0.00519183	Novel_lncRNA	co_location	ENSOCUG00000022315	CEMIP	cell migration inducing hyaluronan binding protein [Source:HGNC Symbol;Acc:HGNC:29213]	GO:0031982,GO:0031988,GO:0048518,GO:0044699,GO:0040017,GO:0044763,GO:0051272,GO:0016477,GO:0048522,GO:0030335,GO:0005575,GO:2000147,GO:0005515,GO:0040011,GO:0048870,GO:0051674,GO:0048519,GO:0051179,GO:0040012,GO:0030334,GO:0006928,GO:0044707,GO:2000145,GO:0032879,GO:0071944,GO:0051270,GO:0032501,GO:0005886,GO:0097367,GO:0006468,GO:0051223,GO:0032880,GO:0005488,GO:0051049,GO:0051050,GO:0005539,GO:…	vesicle,membrane-bounded vesicle,positive regulation of biological process,single-organism process,positive regulation of locomotion,single-organism cellular process,positive regulation of cellular component movement,cell migration,positive regulation of cellular process,positive regulation of cell migration,cellular_component,positive regulation of cell motility,protein binding,locomotion,cell m…	--	--
LNC_000440	XLOC_021856	-	15:24599570-24601909	0.778695	3.30548	-2.08573	0.00285	0.0398925	Novel_lncRNA	co_expression	ENSOCUG00000006864	--	--	GO:0050896,GO:0051716,GO:0050794,GO:0007166,GO:0044763,GO:0044699,GO:0004888,GO:0007165,GO:0050789,GO:0038023,GO:0065007,GO:0004872,GO:0004871,GO:0060089,GO:0007154,GO:0023052,GO:0044700,GO:0009987,GO:0008150,GO:0005575,GO:0016021,GO:0003674,GO:0031224,GO:0044425,GO:0016020	response to stimulus,cellular response to stimulus,regulation of cellular process,cell surface receptor signaling pathway,single-organism cellular process,single-organism process,transmembrane signaling receptor activity,signal transduction,regulation of biological process,signaling receptor activity,biological regulation,receptor activity,signal transducer activity,molecular transducer activity,…	ocu04640,ocu05162,ocu05340,ocu04660,ocu05142,ocu05166	Hematopoietic cell lineage,Measles,Primary immunodeficiency,T cell receptor signaling pathway,Chagas disease (American trypanosomiasis),HTLV-I infection
LNC_000054	XLOC_002863	-	1:7935208-7970054	4.10151	0	inf	5e-05	0.00164462	Novel_lncRNA	co_expression	ENSOCUG00000013898	CARTPT	CART prepropeptide [Source:HGNC Symbol;Acc:HGNC:24323]	GO:0050896,GO:0051716,GO:0050794,GO:0007166,GO:0044763,GO:0044699,GO:0042221,GO:0007186,GO:0007165,GO:0050789,GO:0065007,GO:0044707,GO:0007154,GO:0023052,GO:0044700,GO:0032501,GO:0048518,GO:0048522,GO:0006468,GO:0006950,GO:0050877,GO:0009987,GO:0048583,GO:0005515,GO:0006464,GO:0036211,GO:0043412,GO:0048519,GO:0016310,GO:0031323,GO:0009966,GO:0065009,GO:0044093,GO:0008150,GO:0043085,GO:0003008,GO:…	response to stimulus,cellular response to stimulus,regulation of cellular process,cell surface receptor signaling pathway,single-organism cellular process,single-organism process,response to chemical stimulus,G-protein coupled receptor signaling pathway,signal transduction,regulation of biological process,biological regulation,single-multicellular organism process,cell communication,signaling,sin…	--	--
LNC_001330	XLOC_065634	-	GL018765:565577-568665	558.782	31.9875	4.1267	5e-05	0.00164462	Novel_lncRNA	co_location	ENSOCUG00000017663	CLIP2	CAP-Gly domain containing linker protein 2 [Source:HGNC Symbol;Acc:HGNC:2586]	GO:0005515,GO:0005488,GO:0044446,GO:0044422,GO:0032991,GO:0043228,GO:0043232,GO:0044424,GO:0051010,GO:0005622,GO:0035371,GO:0043234,GO:0043229,GO:0044464,GO:0005623,GO:0005575,GO:0015631,GO:0043226,GO:0005881,GO:0008017,GO:0005874,GO:0044430,GO:0008092,GO:0044444,GO:0003674,GO:0015630,GO:0005737,GO:0005856	protein binding,binding,intracellular organelle part,organelle part,macromolecular complex,non-membrane-bounded organelle,intracellular non-membrane-bounded organelle,intracellular part,microtubule plus-end binding,intracellular,microtubule plus end,protein complex,intracellular organelle,cell part,cell,cellular_component,tubulin binding,organelle,cytoplasmic microtubule,microtubule binding,micro…	--	--
LNC_001334	XLOC_066070	-	GL018776:873018-875166	0.451375	2.23735	-2.30939	0.0037	0.047829	Novel_lncRNA	co_location	ENSOCUG00000025980	AP1M1	adaptor related protein complex 1 mu 1 subunit [Source:HGNC Symbol;Acc:HGNC:13667]	GO:0005515,GO:0005488,GO:0032991,GO:0050931,GO:0030118,GO:0048066,GO:0044424,GO:0032438,GO:0035646,GO:0043476,GO:0043482,GO:0043485,GO:0048757,GO:0048753,GO:0005622,GO:0043473,GO:0043234,GO:0030117,GO:0048475,GO:0043227,GO:0006886,GO:0009605,GO:0044464,GO:0016482,GO:0030131,GO:0005623,GO:0033059,GO:0005575,GO:0032502,GO:0043226,GO:0030119,GO:0045184,GO:0015031,GO:0044767,GO:0005576,GO:0006996,GO:…	protein binding,binding,macromolecular complex,pigment cell differentiation,clathrin coat,developmental pigmentation,intracellular part,melanosome organization,endosome to melanosome transport,pigment accumulation,cellular pigment accumulation,endosome to pigment granule transport,pigment granule maturation,pigment granule organization,intracellular,pigmentation,protein complex,membrane coat,coat…	ocu04142	Lysosome
LNC_001463	XLOC_071141	-	GL018975:213122-214090	0	1.67666	#NAME?	0.0001	0.0029475	Novel_lncRNA	co_expression	ENSOCUG00000006864	--	--	GO:0050896,GO:0051716,GO:0050794,GO:0007166,GO:0044763,GO:0044699,GO:0004888,GO:0007165,GO:0050789,GO:0038023,GO:0065007,GO:0004872,GO:0004871,GO:0060089,GO:0007154,GO:0023052,GO:0044700,GO:0009987,GO:0008150,GO:0005575,GO:0016021,GO:0003674,GO:0031224,GO:0044425,GO:0016020	response to stimulus,cellular response to stimulus,regulation of cellular process,cell surface receptor signaling pathway,single-organism cellular process,single-organism process,transmembrane signaling receptor activity,signal transduction,regulation of biological process,signaling receptor activity,biological regulation,receptor activity,signal transducer activity,molecular transducer activity,…	ocu04640,ocu05162,ocu05340,ocu04660,ocu05142,ocu05166	Hematopoietic cell lineage,Measles,Primary immunodeficiency,T cell receptor signaling pathway,Chagas disease (American trypanosomiasis),HTLV-I infection
LNC_000847	XLOC_042092	-	3:117311930-117314850	0	16.1235	#NAME?	5e-05	0.00164462	Novel_lncRNA	co_location	ENSOCUG00000009431	NCALD	neurocalcin delta [Source:HGNC Symbol;Acc:HGNC:7655]	GO:0005515,GO:0005488,GO:0030276,GO:0005509,GO:0005622,GO:0043227,GO:0044464,GO:0005623,GO:0005575,GO:0015631,GO:0043226,GO:0046872,GO:0035556,GO:0043169,GO:0005576,GO:0043167,GO:0003073,GO:0019722,GO:0008217,GO:0003779,GO:0019932,GO:0008092,GO:0044421,GO:0070062,GO:0043230,GO:0065010,GO:0044707,GO:0032501,GO:0003674,GO:0050789,GO:0031988,GO:0031982,GO:0050794,GO:0008015,GO:0044763,GO:0065007,GO:…	protein binding,binding,clathrin binding,calcium ion binding,intracellular,membrane-bounded organelle,cell part,cell,cellular_component,tubulin binding,organelle,metal ion binding,intracellular signal transduction,cation binding,extracellular region,ion binding,regulation of systemic arterial blood pressure,calcium-mediated signaling,regulation of blood pressure,actin binding,second-messenger-med…	--	--
LNC_000844	XLOC_041851	-	3:96715615-96717768	0.252878	3.24318	-3.6809	0.0009	0.0164348	Novel_lncRNA	co_location	ENSOCUG00000014767	PAG1	phosphoprotein membrane anchor with glycosphingolipid microdomains 1 [Source:HGNC Symbol;Acc:HGNC:30043]	GO:0002376,GO:0045321,GO:0001775,GO:0002682,GO:0046649,GO:0050865,GO:0002694,GO:0042110,GO:0051249,GO:0050896,GO:0050863,GO:0044699,GO:0044763,GO:0005575,GO:0005515,GO:0048519,GO:0048523,GO:0071944,GO:0051716,GO:0005886,GO:0050866,GO:0002683,GO:0002695,GO:0005488,GO:0016020,GO:0065007,GO:0016021,GO:0031224,GO:0050794,GO:0045121,GO:0035556,GO:0007165,GO:0050789,GO:0044425,GO:0051250,GO:0007154,GO:…	immune system process,leukocyte activation,cell activation,regulation of immune system process,lymphocyte activation,regulation of cell activation,regulation of leukocyte activation,T cell activation,regulation of lymphocyte activation,response to stimulus,regulation of T cell activation,single-organism process,single-organism cellular process,cellular_component,protein binding,negative regulatio…	--	--
LNC_001123	XLOC_057571	-	9:100091592-100102888	0	3.01241	#NAME?	0.0001	0.0029475	Novel_lncRNA	co_expression	ENSOCUG00000006864	--	--	GO:0050896,GO:0051716,GO:0050794,GO:0007166,GO:0044763,GO:0044699,GO:0004888,GO:0007165,GO:0050789,GO:0038023,GO:0065007,GO:0004872,GO:0004871,GO:0060089,GO:0007154,GO:0023052,GO:0044700,GO:0009987,GO:0008150,GO:0005575,GO:0016021,GO:0003674,GO:0031224,GO:0044425,GO:0016020	response to stimulus,cellular response to stimulus,regulation of cellular process,cell surface receptor signaling pathway,single-organism cellular process,single-organism process,transmembrane signaling receptor activity,signal transduction,regulation of biological process,signaling receptor activity,biological regulation,receptor activity,signal transducer activity,molecular transducer activity,…	ocu04640,ocu05162,ocu05340,ocu04660,ocu05142,ocu05166	Hematopoietic cell lineage,Measles,Primary immunodeficiency,T cell receptor signaling pathway,Chagas disease (American trypanosomiasis),HTLV-I infection
LNC_001464	XLOC_071174	-	GL018980:46374-48378	1.33591	0	inf	5e-05	0.00164462	Novel_lncRNA	co_location	ENSOCUG00000021951	--	--	GO:0005515,GO:0005488,GO:0044464,GO:0005623,GO:0005575,GO:0044459,GO:0005518,GO:0071944,GO:0016020,GO:0003674,GO:0044425,GO:0005887,GO:0005886,GO:0016021,GO:0031224,GO:0031226	protein binding,binding,cell part,cell,cellular_component,plasma membrane part,collagen binding,cell periphery,membrane,molecular_function,membrane part,integral to plasma membrane,plasma membrane,integral to membrane,intrinsic to membrane,intrinsic to plasma membrane	ocu04512,ocu04611	ECM-receptor interaction,Platelet activation
LNC_000358	XLOC_017205	-	14:4464393-4553744	0.133169	8.09861	-5.92635	0.00065	0.0127331	Novel_lncRNA	co_location	ENSOCUG00000007174	SATB1	SATB homeobox 1 [Source:HGNC Symbol;Acc:HGNC:10541]	GO:0002376,GO:0045321,GO:0001775,GO:0046649,GO:0002521,GO:0002520,GO:0042110,GO:0030097,GO:0048534,GO:0030098,GO:0050896,GO:0048731,GO:0007275,GO:0030217,GO:0044699,GO:0046651,GO:0032943,GO:0070661,GO:0048513,GO:0044767,GO:0000785,GO:0048856,GO:0044427,GO:0044763,GO:0005694,GO:0032502,GO:0009605,GO:0005575,GO:0008283,GO:0005515,GO:0048519,GO:0030154,GO:0044707,GO:0048523,GO:0042098,GO:0032501,GO:…	immune system process,leukocyte activation,cell activation,lymphocyte activation,leukocyte differentiation,immune system development,T cell activation,hemopoiesis,hematopoietic or lymphoid organ development,lymphocyte differentiation,response to stimulus,system development,multicellular organismal development,T cell differentiation,single-organism process,lymphocyte proliferation,mononuclear cell…	--	--
LNC_000968	XLOC_048511	-	7:74097762-74129839	0	2.28768	#NAME?	0.0004	0.00895042	Novel_lncRNA	co_expression	ENSOCUG00000006864	--	--	GO:0050896,GO:0051716,GO:0050794,GO:0007166,GO:0044763,GO:0044699,GO:0004888,GO:0007165,GO:0050789,GO:0038023,GO:0065007,GO:0004872,GO:0004871,GO:0060089,GO:0007154,GO:0023052,GO:0044700,GO:0009987,GO:0008150,GO:0005575,GO:0016021,GO:0003674,GO:0031224,GO:0044425,GO:0016020	response to stimulus,cellular response to stimulus,regulation of cellular process,cell surface receptor signaling pathway,single-organism cellular process,single-organism process,transmembrane signaling receptor activity,signal transduction,regulation of biological process,signaling receptor activity,biological regulation,receptor activity,signal transducer activity,molecular transducer activity,…	ocu04640,ocu05162,ocu05340,ocu04660,ocu05142,ocu05166	Hematopoietic cell lineage,Measles,Primary immunodeficiency,T cell receptor signaling pathway,Chagas disease (American trypanosomiasis),HTLV-I infection
LNC_000608	XLOC_030203	-	18:11591570-11622220	2.39112	0.845187	1.50035	0.00165	0.0261612	Novel_lncRNA	co_expression	ENSOCUG00000013049	PLXND1	plexin D1 [Source:HGNC Symbol;Acc:HGNC:9107]	GO:0051239,GO:0050896,GO:0048731,GO:0044459,GO:0007275,GO:0044699,GO:0048513,GO:0044767,GO:0048856,GO:0044763,GO:0016477,GO:0032502,GO:2000026,GO:0005575,GO:0005515,GO:0040011,GO:0048870,GO:0051674,GO:0051179,GO:0040012,GO:0030334,GO:0006928,GO:0044707,GO:2000145,GO:0032879,GO:0071944,GO:0051270,GO:0032501,GO:0051716,GO:0050793,GO:0005886,GO:0005488,GO:0045765,GO:1901342,GO:0016020,GO:0001525,GO:…	regulation of multicellular organismal process,response to stimulus,system development,plasma membrane part,multicellular organismal development,single-organism process,organ development,single-organism developmental process,anatomical structure development,single-organism cellular process,cell migration,developmental process,regulation of multicellular organismal development,cellular_component,p…	--	--
LNC_001230	XLOC_061964	-	GL018717:3391415-3396624	133.058	19.4374	2.77515	5e-05	0.00164462	Novel_lncRNA	co_location	ENSOCUG00000024726	CPSF7	cleavage and polyadenylation specific factor 7 [Source:HGNC Symbol;Acc:HGNC:30098]	GO:0005515,GO:0005488,GO:0044446,GO:0003676,GO:1901363,GO:0044422,GO:0097159,GO:0032991,GO:0044424,GO:0036094,GO:0043231,GO:0005622,GO:0000166,GO:1901265,GO:0043234,GO:0043229,GO:0005849,GO:0005634,GO:0043227,GO:0044464,GO:0005623,GO:0005575,GO:0043226,GO:0044451,GO:0006461,GO:0070271,GO:0071822,GO:0065003,GO:0051262,GO:0022607,GO:0043933,GO:0016043,GO:0005654,GO:0071840,GO:0051259,GO:0044085,GO:…	protein binding,binding,intracellular organelle part,nucleic acid binding,heterocyclic compound binding,organelle part,organic cyclic compound binding,macromolecular complex,intracellular part,small molecule binding,intracellular membrane-bounded organelle,intracellular,nucleotide binding,nucleoside phosphate binding,protein complex,intracellular organelle,mRNA cleavage factor complex,nucleus,mem…	ocu03015	mRNA surveillance pathway
LNC_000106	XLOC_005570	-	10:43297745-43305653	0	1.72228	#NAME?	0.00065	0.0127331	Novel_lncRNA	co_expression	ENSOCUG00000026439	ZNF75D	zinc finger protein 75D [Source:HGNC Symbol;Acc:HGNC:13145]	GO:0050794,GO:0050789,GO:0065007,GO:0090304,GO:0003676,GO:0009987,GO:0051171,GO:0006139,GO:0019219,GO:0031323,GO:0051252,GO:0008150,GO:0006807,GO:0006725,GO:0034641,GO:0060255,GO:0046483,GO:1901360,GO:0019222,GO:2001141,GO:0080090,GO:1901363,GO:0003674,GO:0006355,GO:0010556,GO:0097159,GO:0032774,GO:2000112,GO:0006351,GO:0031326,GO:0016070,GO:0009889,GO:0010468,GO:0034654,GO:0005488,GO:0019438,GO:…	regulation of cellular process,regulation of biological process,biological regulation,nucleic acid metabolic process,nucleic acid binding,cellular process,regulation of nitrogen compound metabolic process,nucleobase-containing compound metabolic process,regulation of nucleobase-containing compound metabolic process,regulation of cellular metabolic process,regulation of RNA metabolic process,biolo…	--	--
LNC_001177	XLOC_059873	-	GL018702:4485503-4542655	0	3.24645	#NAME?	0.0016	0.0255726	Novel_lncRNA	co_location	ENSOCUG00000003624	RFC3	replication factor C subunit 3 [Source:HGNC Symbol;Acc:HGNC:9971]	GO:0044427,GO:0005694,GO:0005515,GO:0003677,GO:0005488,GO:0005663,GO:1900262,GO:1900264,GO:0031390,GO:0044446,GO:0003689,GO:0033170,GO:0003676,GO:1901363,GO:0044422,GO:0097159,GO:0043142,GO:0032991,GO:0008094,GO:0043228,GO:0043232,GO:0006259,GO:0005657,GO:0044424,GO:0051347,GO:0005622,GO:0043234,GO:0043229,GO:0016887,GO:0044464,GO:0005623,GO:0006260,GO:0005575,GO:0042623,GO:0043226,GO:0051338,GO:…	chromosomal part,chromosome,protein binding,DNA binding,binding,DNA replication factor C complex,regulation of DNA-directed DNA polymerase activity,positive regulation of DNA-directed DNA polymerase activity,Ctf18 RFC-like complex,intracellular organelle part,DNA clamp loader activity,protein-DNA loading ATPase activity,nucleic acid binding,heterocyclic compound binding,organelle part,organic cyc…	ocu03420,ocu03430,ocu03030	Nucleotide excision repair,Mismatch repair,DNA replication
LNC_001550	XLOC_073988	-	GL019367:24423-26582	40.2216	5.59704	2.84524	5e-05	0.00164462	Novel_lncRNA	co_location	ENSOCUG00000015545	NAXD	NAD(P)HX dehydratase [Source:HGNC Symbol;Acc:HGNC:25576]	GO:0005515,GO:0005488,GO:0047453,GO:0052855,GO:0044424,GO:0043231,GO:0005622,GO:0043229,GO:0043227,GO:0044464,GO:0005623,GO:0005575,GO:0043226,GO:0019362,GO:0046496,GO:0072524,GO:0016829,GO:0016836,GO:0006733,GO:0051186,GO:0016835,GO:0044710,GO:0044444,GO:0006732,GO:0003824,GO:0003674,GO:0005739,GO:0006725,GO:0005737,GO:1901360,GO:0006807,GO:1901564,GO:0046483,GO:0006139,GO:0034641,GO:0044281,GO:…	protein binding,binding,ATP-dependent NAD(P)H-hydrate dehydratase activity,ADP-dependent NAD(P)H-hydrate dehydratase activity,intracellular part,intracellular membrane-bounded organelle,intracellular,intracellular organelle,membrane-bounded organelle,cell part,cell,cellular_component,organelle,pyridine nucleotide metabolic process,nicotinamide nucleotide metabolic process,pyridine-containing comp…	--	--
LNC_001071	XLOC_054118	-	8:81010850-81196338	11.3853	0.25717	5.4683	5e-05	0.00164462	Novel_lncRNA	co_expression	ENSOCUG00000014277	ABHD4	abhydrolase domain containing 4 [Source:HGNC Symbol;Acc:HGNC:20154]	--	--	--	--
LNC_001073	XLOC_054413	-	8:103937614-103949019	1.75105	0.247916	2.8203	0.00015	0.00413724	Novel_lncRNA	co_expression	ENSOCUG00000027924	SIRT2	sirtuin 2 [Source:HGNC Symbol;Acc:HGNC:10886]	GO:0005694,GO:0050896,GO:0007059,GO:0051716,GO:0050794,GO:0007166,GO:0044763,GO:0022402,GO:0051276,GO:0044699,GO:0007049,GO:0042221,GO:0007165,GO:0050789,GO:0065007,GO:0044707,GO:0007154,GO:0023052,GO:0044700,GO:0032501,GO:0006325,GO:0010564,GO:0048518,GO:0016575,GO:0000226,GO:0051726,GO:0051301,GO:0048522,GO:0016569,GO:0051983,GO:0007010,GO:0006996,GO:0016570,GO:0008608,GO:0090304,GO:0006952,GO:…	chromosome,response to stimulus,chromosome segregation,cellular response to stimulus,regulation of cellular process,cell surface receptor signaling pathway,single-organism cellular process,cell cycle process,chromosome organization,single-organism process,cell cycle,response to chemical stimulus,signal transduction,regulation of biological process,biological regulation,single-multicellular organi…	--	--
LNC_000590	XLOC_029277	-	18:27624159-27628631	2.20274	0.19433	3.50272	0.0037	0.047829	Novel_lncRNA	co_location	ENSOCUG00000013696	BICC1	BicC family RNA binding protein 1 [Source:HGNC Symbol;Acc:HGNC:19351]	GO:0050896,GO:0048731,GO:0007275,GO:0044699,GO:0048513,GO:0044767,GO:0048856,GO:0044763,GO:0048583,GO:0032502,GO:0005515,GO:0048519,GO:0044707,GO:0048523,GO:0032501,GO:0051716,GO:0009966,GO:0023051,GO:0005488,GO:0010646,GO:0048585,GO:0065007,GO:0050794,GO:0007165,GO:0050789,GO:0009968,GO:0072358,GO:0072359,GO:0007154,GO:0044700,GO:0023057,GO:0023052,GO:0010648,GO:0007166,GO:0008150,GO:0090090,GO:…	response to stimulus,system development,multicellular organismal development,single-organism process,organ development,single-organism developmental process,anatomical structure development,single-organism cellular process,regulation of response to stimulus,developmental process,protein binding,negative regulation of biological process,single-multicellular organism process,negative regulation of …	--	--
LNC_000591	XLOC_029339	-	18:30457822-30463858	0.949384	0.143119	2.72977	0.0019	0.0293061	Novel_lncRNA	co_expression	ENSOCUG00000002231	VLDLR	Very low-density lipoprotein receptor [Source:UniProtKB/Swiss-Prot;Acc:P35953]	GO:0044421,GO:0005576,GO:0051239,GO:0050896,GO:0048731,GO:0007275,GO:0048518,GO:0044699,GO:0005615,GO:0044767,GO:0048856,GO:0044763,GO:0048522,GO:0032502,GO:2000026,GO:0005575,GO:0005515,GO:0048519,GO:0051179,GO:0030154,GO:0044707,GO:0048523,GO:0051094,GO:0032501,GO:0051716,GO:0050793,GO:0048869,GO:0006468,GO:0005509,GO:0005488,GO:0016020,GO:0065007,GO:0044093,GO:0016021,GO:0006897,GO:0044765,GO:…	extracellular region part,extracellular region,regulation of multicellular organismal process,response to stimulus,system development,multicellular organismal development,positive regulation of biological process,single-organism process,extracellular space,single-organism developmental process,anatomical structure development,single-organism cellular process,positive regulation of cellular proces…	--	--
LNC_000383	XLOC_018567	-	14:83622331-83624261	0	1.40473	#NAME?	0.0007	0.0135291	Novel_lncRNA	co_expression	ENSOCUG00000006864	--	--	GO:0050896,GO:0051716,GO:0050794,GO:0007166,GO:0044763,GO:0044699,GO:0004888,GO:0007165,GO:0050789,GO:0038023,GO:0065007,GO:0004872,GO:0004871,GO:0060089,GO:0007154,GO:0023052,GO:0044700,GO:0009987,GO:0008150,GO:0005575,GO:0016021,GO:0003674,GO:0031224,GO:0044425,GO:0016020	response to stimulus,cellular response to stimulus,regulation of cellular process,cell surface receptor signaling pathway,single-organism cellular process,single-organism process,transmembrane signaling receptor activity,signal transduction,regulation of biological process,signaling receptor activity,biological regulation,receptor activity,signal transducer activity,molecular transducer activity,…	ocu04640,ocu05162,ocu05340,ocu04660,ocu05142,ocu05166	Hematopoietic cell lineage,Measles,Primary immunodeficiency,T cell receptor signaling pathway,Chagas disease (American trypanosomiasis),HTLV-I infection
LNC_000655	XLOC_033257	-	2:29450977-29455969	0.955763	24.2416	-4.66469	5e-05	0.00164462	Novel_lncRNA	co_location	ENSOCUG00000005111	N4BP2	NEDD4 binding protein 2 [Source:HGNC Symbol;Acc:HGNC:29851]	GO:0005515,GO:0005488,GO:1901363,GO:0097159,GO:0046404,GO:0051733,GO:0051734,GO:0051731,GO:0044424,GO:0036094,GO:0005622,GO:0000166,GO:1901265,GO:0044464,GO:0005623,GO:0005575,GO:0032555,GO:0017076,GO:0032553,GO:0016773,GO:0019205,GO:0005524,GO:0032559,GO:0043168,GO:0030554,GO:0035639,GO:0032550,GO:0001883,GO:0032549,GO:0001882,GO:0016301,GO:0043167,GO:0004519,GO:0016787,GO:0016772,GO:0004518,GO:…	protein binding,binding,heterocyclic compound binding,organic cyclic compound binding,ATP-dependent polydeoxyribonucleotide 5'-hydroxyl-kinase activity,polydeoxyribonucleotide kinase activity,ATP-dependent polynucleotide kinase activity,polynucleotide 5'-hydroxyl-kinase activity,intracellular part,small molecule binding,intracellular,nucleotide binding,nucleoside phosphate binding,cell part,cell,…	--	--
LNC_001266	XLOC_063297	-	GL018729:2207081-2209615	1.2633	0	inf	5e-05	0.00164462	Novel_lncRNA	co_expression	ENSOCUG00000003367	TLR2	toll like receptor 2 [Source:HGNC Symbol;Acc:HGNC:11848]	GO:0002376,GO:0006955,GO:0002682,GO:0002684,GO:0001816,GO:0009986,GO:0006952,GO:0001817,GO:0051239,GO:0046982,GO:0050896,GO:0070887,GO:0002237,GO:0010033,GO:0006950,GO:0048584,GO:0009617,GO:0050778,GO:0044459,GO:0050776,GO:0046983,GO:0006954,GO:0048518,GO:0044699,GO:0009611,GO:0002764,GO:0051707,GO:0071219,GO:0009607,GO:0002757,GO:0044763,GO:0002253,GO:0048522,GO:0071216,GO:0045087,GO:0048583,GO:…	immune system process,immune response,regulation of immune system process,positive regulation of immune system process,cytokine production,cell surface,defense response,regulation of cytokine production,regulation of multicellular organismal process,protein heterodimerization activity,response to stimulus,cellular response to chemical stimulus,response to molecule of bacterial origin,response to …	ocu05323,ocu05146,ocu05152,ocu05144,ocu04151,ocu04145,ocu05140,ocu04620,ocu05162,ocu05142,ocu05321,ocu05145,ocu05134,ocu05161,ocu05168,ocu05205	Rheumatoid arthritis,Amoebiasis,Tuberculosis,Malaria,PI3K-Akt signaling pathway,Phagosome,Leishmaniasis,Toll-like receptor signaling pathway,Measles,Chagas disease (American trypanosomiasis),Inflammatory bowel disease (IBD),Toxoplasmosis,Legionellosis,Hepatitis B,Herpes simplex infection,Proteoglycans in cancer
LNC_000130	XLOC_006472	-	10:47729044-47732528	0	1.01419	#NAME?	5e-05	0.00164462	Novel_lncRNA	co_location	ENSOCUG00000016823	COBL	cordon-bleu WH2 repeat protein [Source:HGNC Symbol;Acc:HGNC:22199]	GO:0005515,GO:0005488,GO:0044446,GO:0044422,GO:0032991,GO:0048589,GO:0007389,GO:0044294,GO:0005938,GO:0043228,GO:0043232,GO:0048588,GO:1900029,GO:0060562,GO:0033504,GO:0001757,GO:2000026,GO:0035239,GO:0051639,GO:0044424,GO:0048669,GO:0035295,GO:0044295,GO:0044292,GO:0051239,GO:0005884,GO:1900006,GO:0005622,GO:0060560,GO:0031346,GO:0009798,GO:0033267,GO:0002009,GO:0043234,GO:0043229,GO:0061053,GO:…	protein binding,binding,intracellular organelle part,organelle part,macromolecular complex,developmental growth,pattern specification process,dendritic growth cone,cell cortex,non-membrane-bounded organelle,intracellular non-membrane-bounded organelle,developmental cell growth,positive regulation of ruffle assembly,epithelial tube morphogenesis,floor plate development,somite specification,regulat…	--	--
LNC_001029	XLOC_051968	-	8:2638005-2647023	0.118517	1.95321	-4.04268	0.00255	0.0367288	Novel_lncRNA	co_location	ENSOCUG00000012959	ADAMTS20	ADAM metallopeptidase with thrombospondin type 1 motif 20 [Source:HGNC Symbol;Acc:HGNC:17178]	GO:0005488,GO:0048519,GO:0048523,GO:0050931,GO:0043066,GO:0043069,GO:0048066,GO:2000026,GO:0060548,GO:0045636,GO:0045634,GO:0050942,GO:0051239,GO:0050932,GO:0048087,GO:0043473,GO:0048070,GO:0002065,GO:0030856,GO:0023051,GO:0010646,GO:0030318,GO:0050793,GO:0005575,GO:0048583,GO:0009966,GO:0048584,GO:0032502,GO:0045597,GO:0045595,GO:0060563,GO:0030858,GO:0046872,GO:0043169,GO:0007275,GO:0051094,GO:…	binding,negative regulation of biological process,negative regulation of cellular process,pigment cell differentiation,negative regulation of apoptotic process,negative regulation of programmed cell death,developmental pigmentation,regulation of multicellular organismal development,negative regulation of cell death,positive regulation of melanocyte differentiation,regulation of melanocyte differe…	--	--
LNC_001103	XLOC_056075	-	9:14179839-14201054	0.233545	6.05207	-4.69565	5e-05	0.00164462	Novel_lncRNA	co_location	ENSOCUG00000004317	CXCR6	C-X-C motif chemokine receptor 6 [Source:HGNC Symbol;Acc:HGNC:16647]	GO:0005515,GO:0005488,GO:0001637,GO:0004950,GO:0019958,GO:0016494,GO:0004896,GO:0006935,GO:0042330,GO:0015026,GO:0019956,GO:0008528,GO:0009605,GO:0001653,GO:0005575,GO:0040011,GO:0006954,GO:0019955,GO:0009611,GO:0006952,GO:0016020,GO:0003674,GO:0050789,GO:0044425,GO:0042221,GO:0050794,GO:0044763,GO:0065007,GO:0007166,GO:0016021,GO:0031224,GO:0044699,GO:0051716,GO:0007165,GO:0044700,GO:0023052,GO:…	protein binding,binding,G-protein coupled chemoattractant receptor activity,chemokine receptor activity,C-X-C chemokine binding,C-X-C chemokine receptor activity,cytokine receptor activity,chemotaxis,taxis,coreceptor activity,chemokine binding,G-protein coupled peptide receptor activity,response to external stimulus,peptide receptor activity,cellular_component,locomotion,inflammatory response,cyt…	ocu04062,ocu04060	Chemokine signaling pathway,Cytokine-cytokine receptor interaction
LNC_001532	XLOC_073374	-	GL019219:21-6779	0.505928	15.6749	-4.95338	5e-05	0.00164462	Novel_lncRNA	co_expression	ENSOCUG00000006864	--	--	GO:0050896,GO:0051716,GO:0050794,GO:0007166,GO:0044763,GO:0044699,GO:0004888,GO:0007165,GO:0050789,GO:0038023,GO:0065007,GO:0004872,GO:0004871,GO:0060089,GO:0007154,GO:0023052,GO:0044700,GO:0009987,GO:0008150,GO:0005575,GO:0016021,GO:0003674,GO:0031224,GO:0044425,GO:0016020	response to stimulus,cellular response to stimulus,regulation of cellular process,cell surface receptor signaling pathway,single-organism cellular process,single-organism process,transmembrane signaling receptor activity,signal transduction,regulation of biological process,signaling receptor activity,biological regulation,receptor activity,signal transducer activity,molecular transducer activity,…	ocu04640,ocu05162,ocu05340,ocu04660,ocu05142,ocu05166	Hematopoietic cell lineage,Measles,Primary immunodeficiency,T cell receptor signaling pathway,Chagas disease (American trypanosomiasis),HTLV-I infection
LNC_001217	XLOC_061357	-	GL018711:1838303-1841253	0	2.23562	#NAME?	5e-05	0.00164462	Novel_lncRNA	co_location	ENSOCUG00000003869	DEK	DEK proto-oncogene [Source:HGNC Symbol;Acc:HGNC:2768]	GO:0005515,GO:0003677,GO:0005488,GO:0003676,GO:1901363,GO:0097159,GO:0043228,GO:0043232,GO:2001032,GO:0006259,GO:0044424,GO:0051052,GO:0043231,GO:0005622,GO:0043229,GO:0006303,GO:0005634,GO:0043227,GO:0044464,GO:0000726,GO:0005623,GO:0005575,GO:0048583,GO:2000779,GO:0043226,GO:0006282,GO:0080134,GO:2001020,GO:0043292,GO:0042393,GO:0006281,GO:0044444,GO:0006302,GO:0003674,GO:0050789,GO:0090304,GO:…	protein binding,DNA binding,binding,nucleic acid binding,heterocyclic compound binding,organic cyclic compound binding,non-membrane-bounded organelle,intracellular non-membrane-bounded organelle,regulation of double-strand break repair via nonhomologous end joining,DNA metabolic process,intracellular part,regulation of DNA metabolic process,intracellular membrane-bounded organelle,intracellular,i…	--	--
LNC_001472	XLOC_071416	-	GL019003:24093-36487	1.31688	8.26324	-2.64958	5e-05	0.00164462	Novel_lncRNA	co_location	ENSOCUG00000027955	--	--	--	--	--	--
LNC_000439	XLOC_021693	-	15:20031069-20034314	2.56425	21.491	-3.06713	5e-05	0.00164462	Novel_lncRNA	co_location	ENSOCUG00000004959	HHIP	hedgehog interacting protein [Source:HGNC Symbol;Acc:HGNC:14866]	GO:0009986,GO:0050896,GO:0070887,GO:0010033,GO:0048731,GO:0044459,GO:0007275,GO:0044699,GO:0048513,GO:0044767,GO:0048856,GO:0044763,GO:0048583,GO:0032502,GO:0005575,GO:0008283,GO:0005515,GO:0042221,GO:0071310,GO:0048519,GO:0030154,GO:0044707,GO:0048523,GO:0071944,GO:0032501,GO:0051716,GO:0005886,GO:0048869,GO:0009966,GO:0023051,GO:0005488,GO:0010646,GO:0016020,GO:0048585,GO:0065007,GO:0016021,GO:…	cell surface,response to stimulus,cellular response to chemical stimulus,response to organic substance,system development,plasma membrane part,multicellular organismal development,single-organism process,organ development,single-organism developmental process,anatomical structure development,single-organism cellular process,regulation of response to stimulus,developmental process,cellular_compone…	ocu05200,ocu04024,ocu05217,ocu04340	Pathways in cancer,cAMP signaling pathway,Basal cell carcinoma,Hedgehog signaling pathway
LNC_000165	XLOC_008472	-	12:10752949-10755108	0	1.10044	#NAME?	5e-05	0.00164462	Novel_lncRNA	co_location	ENSOCUG00000006757	--	--	GO:0005488,GO:1901363,GO:0097159,GO:0036094,GO:0000166,GO:1901265,GO:0032555,GO:0017076,GO:0032553,GO:0005524,GO:0032559,GO:0043168,GO:0030554,GO:0035639,GO:0032550,GO:0001883,GO:0032549,GO:0001882,GO:0043167,GO:0003674	binding,heterocyclic compound binding,organic cyclic compound binding,small molecule binding,nucleotide binding,nucleoside phosphate binding,purine ribonucleotide binding,purine nucleotide binding,ribonucleotide binding,ATP binding,adenyl ribonucleotide binding,anion binding,adenyl nucleotide binding,purine ribonucleoside triphosphate binding,purine ribonucleoside binding,purine nucleoside bindin…	ocu04120	Ubiquitin mediated proteolysis
LNC_000983	XLOC_049412	-	7:138471850-138477952	0.828182	10.8279	-3.70866	5e-05	0.00164462	Novel_lncRNA	co_location	ENSOCUG00000013978	PLCL1	phospholipase C like 1 [Source:HGNC Symbol;Acc:HGNC:9063]	GO:0051239,GO:0050896,GO:0044699,GO:0044763,GO:0005575,GO:0005515,GO:0044707,GO:0071944,GO:0032501,GO:0051716,GO:0005886,GO:0006468,GO:0005102,GO:0023051,GO:0005488,GO:0010646,GO:0016020,GO:0065007,GO:0044093,GO:0050794,GO:0035556,GO:0007165,GO:0050789,GO:0065009,GO:0016310,GO:0031399,GO:0001932,GO:0051246,GO:0051098,GO:0042325,GO:0043393,GO:0007154,GO:0044700,GO:0023052,GO:0018193,GO:0032268,GO:…	regulation of multicellular organismal process,response to stimulus,single-organism process,single-organism cellular process,cellular_component,protein binding,single-multicellular organism process,cell periphery,multicellular organismal process,cellular response to stimulus,plasma membrane,protein phosphorylation,receptor binding,regulation of signaling,binding,regulation of cell communication,m…	ocu04727	GABAergic synapse
LNC_000324	XLOC_015763	-	13:53782677-53818198	2.28359	7.22176	-1.66105	0.0017	0.026767	Novel_lncRNA	co_location	ENSOCUG00000026023	--	--	GO:0004190,GO:0070001,GO:0006508,GO:0016787,GO:0003824,GO:0003674,GO:0004175,GO:0019538,GO:0070011,GO:0008233,GO:0043170,GO:0008152,GO:0071704,GO:0044238,GO:0008150	aspartic-type endopeptidase activity,aspartic-type peptidase activity,proteolysis,hydrolase activity,catalytic activity,molecular_function,endopeptidase activity,protein metabolic process,peptidase activity, acting on L-amino acid peptides,peptidase activity,macromolecule metabolic process,metabolic process,organic substance metabolic process,primary metabolic process,biological_process	--	--
LNC_000209	XLOC_010536	-	12:5005069-5013219	0.999705	3.68407	-1.88173	0.0012	0.0204994	Novel_lncRNA	co_location	ENSOCUG00000015292	NEDD9	neural precursor cell expressed, developmentally down-regulated 9 [Source:HGNC Symbol;Acc:HGNC:7733]	GO:0005515,GO:0005488,GO:0044446,GO:0044422,GO:0032991,GO:0043228,GO:0043232,GO:0044424,GO:0043231,GO:0005622,GO:0043234,GO:0043229,GO:0005634,GO:0043227,GO:0044464,GO:0005623,GO:0005575,GO:0043226,GO:0000922,GO:0044430,GO:0003674,GO:0005819,GO:0015630,GO:0005856	protein binding,binding,intracellular organelle part,organelle part,macromolecular complex,non-membrane-bounded organelle,intracellular non-membrane-bounded organelle,intracellular part,intracellular membrane-bounded organelle,intracellular,protein complex,intracellular organelle,nucleus,membrane-bounded organelle,cell part,cell,cellular_component,organelle,spindle pole,cytoskeletal part,molecula…	--	--
LNC_000196	XLOC_009780	-	12:108488415-108528318	1.90779	21.3824	-3.48645	0.00015	0.00413724	Novel_lncRNA	co_location	ENSOCUG00000022640	--	--	--	--	--	--
LNC_000191	XLOC_009644	-	12:101840643-101848126	1.19896	0.131309	3.19075	0.0005	0.0103837	Novel_lncRNA	co_location	ENSOCUG00000000598	HDAC2	histone deacetylase 2 [Source:HGNC Symbol;Acc:HGNC:4853]	GO:0000785,GO:0044427,GO:0005694,GO:0005515,GO:0003677,GO:0005488,GO:0044446,GO:0003676,GO:1901363,GO:0044422,GO:0097159,GO:0048519,GO:0032991,GO:0048523,GO:0006338,GO:0043228,GO:0043232,GO:0006344,GO:0044424,GO:0016568,GO:0000122,GO:0016570,GO:0008284,GO:0016569,GO:0031078,GO:0032041,GO:0040029,GO:0016580,GO:0070822,GO:0010870,GO:0043231,GO:0005622,GO:0008283,GO:0006325,GO:0017136,GO:0042127,GO:…	chromatin,chromosomal part,chromosome,protein binding,DNA binding,binding,intracellular organelle part,nucleic acid binding,heterocyclic compound binding,organelle part,organic cyclic compound binding,negative regulation of biological process,macromolecular complex,negative regulation of cellular process,chromatin remodeling,non-membrane-bounded organelle,intracellular non-membrane-bounded organe…	ocu05034,ocu05203,ocu05202,ocu04330,ocu05200,ocu05169,ocu05220,ocu04919,ocu04110,ocu05016	Alcoholism,Viral carcinogenesis,Transcriptional misregulation in cancer,Notch signaling pathway,Pathways in cancer,Epstein-Barr virus infection,Chronic myeloid leukemia,Thyroid hormone signaling pathway,Cell cycle,Huntington's disease
LNC_000192	XLOC_009754	-	12:108397430-108450887	1.01084	5.12931	-2.34321	0.0027	0.0383332	Novel_lncRNA	co_location	ENSOCUG00000006700	MAN1A1	mannosidase alpha class 1A member 1 [Source:HGNC Symbol;Acc:HGNC:6821]	GO:0005488,GO:0044446,GO:0044422,GO:0044424,GO:0004571,GO:0015924,GO:0005509,GO:0043231,GO:0005622,GO:0043229,GO:0043227,GO:0004559,GO:0015923,GO:0044464,GO:0005623,GO:0004553,GO:0005575,GO:0016798,GO:0043226,GO:0046872,GO:0005793,GO:0043169,GO:0005576,GO:0043167,GO:0016787,GO:0012505,GO:0044421,GO:0031090,GO:0070062,GO:0043230,GO:0065010,GO:0044444,GO:0016020,GO:0003824,GO:0003674,GO:0031988,GO:…	binding,intracellular organelle part,organelle part,intracellular part,mannosyl-oligosaccharide 1,2-alpha-mannosidase activity,mannosyl-oligosaccharide mannosidase activity,calcium ion binding,intracellular membrane-bounded organelle,intracellular,intracellular organelle,membrane-bounded organelle,alpha-mannosidase activity,mannosidase activity,cell part,cell,hydrolase activity, hydrolyzing O-gly…	ocu00510,ocu04141,ocu01100	N-Glycan biosynthesis,Protein processing in endoplasmic reticulum,Metabolic pathways
LNC_001245	XLOC_062719	-	GL018724:2499008-2505039	1.09197	0.131012	3.05916	0.00145	0.0237977	Novel_lncRNA	co_location	ENSOCUG00000004579	NRP1	neuropilin 1 [Source:HGNC Symbol;Acc:HGNC:8004]	GO:0044421,GO:0005576,GO:0051239,GO:0050896,GO:0070887,GO:0010033,GO:0048584,GO:0048731,GO:0007275,GO:0048518,GO:0044699,GO:0048513,GO:0005615,GO:0060326,GO:0044767,GO:0048856,GO:0040017,GO:0044763,GO:0051272,GO:0016477,GO:0048522,GO:0048583,GO:0032502,GO:0009605,GO:2000026,GO:0005575,GO:0005515,GO:0040011,GO:0042221,GO:0071310,GO:0006935,GO:0042330,GO:0048870,GO:0051674,GO:0048519,GO:0051179,GO:…	extracellular region part,extracellular region,regulation of multicellular organismal process,response to stimulus,cellular response to chemical stimulus,response to organic substance,positive regulation of response to stimulus,system development,multicellular organismal development,positive regulation of biological process,single-organism process,organ development,extracellular space,cell chemot…	ocu05166,ocu04360	HTLV-I infection,Axon guidance
LNC_001243	XLOC_062669	-	GL018724:1536502-1550242	0	1.47761	#NAME?	0.002	0.0305519	Novel_lncRNA	co_location	ENSOCUG00000014729	CUL2	cullin 2 [Source:HGNC Symbol;Acc:HGNC:2552]	GO:0005515,GO:0005488,GO:0044446,GO:0044422,GO:0032991,GO:0000151,GO:0043228,GO:0043232,GO:0031462,GO:0044424,GO:0043231,GO:0005622,GO:0043234,GO:0043229,GO:0005634,GO:0043227,GO:0031461,GO:0044464,GO:0005623,GO:0005575,GO:0043226,GO:0006508,GO:0031625,GO:0044389,GO:0006511,GO:0019941,GO:0043632,GO:0019899,GO:0051603,GO:0005654,GO:0044257,GO:0009057,GO:0070013,GO:0043233,GO:0031974,GO:0030163,GO:…	protein binding,binding,intracellular organelle part,organelle part,macromolecular complex,ubiquitin ligase complex,non-membrane-bounded organelle,intracellular non-membrane-bounded organelle,Cul2-RING ubiquitin ligase complex,intracellular part,intracellular membrane-bounded organelle,intracellular,protein complex,intracellular organelle,nucleus,membrane-bounded organelle,cullin-RING ubiquitin l…	ocu04120,ocu05200,ocu05211,ocu04066	Ubiquitin mediated proteolysis,Pathways in cancer,Renal cell carcinoma,HIF-1 signaling pathway
LNC_000116	XLOC_005872	-	10:20217574-20220598	0	1.07843	#NAME?	5e-05	0.00164462	Novel_lncRNA	co_location	ENSOCUG00000014567	AOAH	Acyloxyacyl hydrolase Acyloxyacyl hydrolase small subunit Acyloxyacyl hydrolase large subunit [Source:UniProtKB/Swiss-Prot;Acc:O18823]	GO:0048519,GO:0008653,GO:0050528,GO:0048585,GO:0009605,GO:0005575,GO:0048583,GO:0032102,GO:0031347,GO:0032101,GO:0044262,GO:0005576,GO:0050727,GO:0044264,GO:0006954,GO:0005976,GO:0016787,GO:0080134,GO:0050728,GO:0052689,GO:0009611,GO:0031348,GO:0044710,GO:0006952,GO:0003824,GO:0003674,GO:0050789,GO:0005975,GO:0016788,GO:0065007,GO:0044255,GO:0006629,GO:0044260,GO:0043170,GO:0008152,GO:0050896,GO:…	negative regulation of biological process,lipopolysaccharide metabolic process,acyloxyacyl hydrolase activity,negative regulation of response to stimulus,response to external stimulus,cellular_component,regulation of response to stimulus,negative regulation of response to external stimulus,regulation of defense response,regulation of response to external stimulus,cellular carbohydrate metabolic p…	--	--
LNC_000807	XLOC_040359	-	3:133067263-133068158	0	15.0053	#NAME?	0.0007	0.0135291	Novel_lncRNA	co_expression	ENSOCUG00000006864	--	--	GO:0050896,GO:0051716,GO:0050794,GO:0007166,GO:0044763,GO:0044699,GO:0004888,GO:0007165,GO:0050789,GO:0038023,GO:0065007,GO:0004872,GO:0004871,GO:0060089,GO:0007154,GO:0023052,GO:0044700,GO:0009987,GO:0008150,GO:0005575,GO:0016021,GO:0003674,GO:0031224,GO:0044425,GO:0016020	response to stimulus,cellular response to stimulus,regulation of cellular process,cell surface receptor signaling pathway,single-organism cellular process,single-organism process,transmembrane signaling receptor activity,signal transduction,regulation of biological process,signaling receptor activity,biological regulation,receptor activity,signal transducer activity,molecular transducer activity,…	ocu04640,ocu05162,ocu05340,ocu04660,ocu05142,ocu05166	Hematopoietic cell lineage,Measles,Primary immunodeficiency,T cell receptor signaling pathway,Chagas disease (American trypanosomiasis),HTLV-I infection
LNC_000773	XLOC_039064	-	3:21722942-21729312	0.247629	2.33576	-3.23764	0.00105	0.0185555	Novel_lncRNA	co_location	ENSOCUG00000006955	DNAJC18	DnaJ heat shock protein family (Hsp40) member C18 [Source:HGNC Symbol;Acc:HGNC:28429]	--	--	--	--
LNC_000257	XLOC_012701	-	13:5257141-5274144	4.14459	1.52492	1.4425	0.0023	0.0339277	Novel_lncRNA	co_location	ENSOCUG00000023110	--	--	GO:0005488,GO:0044424,GO:0043231,GO:0005622,GO:0043229,GO:0043227,GO:0044464,GO:0005623,GO:0005575,GO:0043226,GO:0046872,GO:0043169,GO:0043167,GO:0055114,GO:0016491,GO:0044710,GO:0044444,GO:0008270,GO:0003824,GO:0003674,GO:0005739,GO:0005737,GO:0046914,GO:0008152,GO:0008150	binding,intracellular part,intracellular membrane-bounded organelle,intracellular,intracellular organelle,membrane-bounded organelle,cell part,cell,cellular_component,organelle,metal ion binding,cation binding,ion binding,oxidation-reduction process,oxidoreductase activity,single-organism metabolic process,cytoplasmic part,zinc ion binding,catalytic activity,molecular_function,mitochondrion,cytop…	--	--
LNC_000397	XLOC_019660	-	14:18277407-18329416	0.0427387	1.24111	-4.85994	0.0034	0.0449383	Novel_lncRNA	co_expression	ENSOCUG00000006864	--	--	GO:0050896,GO:0051716,GO:0050794,GO:0007166,GO:0044763,GO:0044699,GO:0004888,GO:0007165,GO:0050789,GO:0038023,GO:0065007,GO:0004872,GO:0004871,GO:0060089,GO:0007154,GO:0023052,GO:0044700,GO:0009987,GO:0008150,GO:0005575,GO:0016021,GO:0003674,GO:0031224,GO:0044425,GO:0016020	response to stimulus,cellular response to stimulus,regulation of cellular process,cell surface receptor signaling pathway,single-organism cellular process,single-organism process,transmembrane signaling receptor activity,signal transduction,regulation of biological process,signaling receptor activity,biological regulation,receptor activity,signal transducer activity,molecular transducer activity,…	ocu04640,ocu05162,ocu05340,ocu04660,ocu05142,ocu05166	Hematopoietic cell lineage,Measles,Primary immunodeficiency,T cell receptor signaling pathway,Chagas disease (American trypanosomiasis),HTLV-I infection
LNC_000067	XLOC_003345	-	1:52977393-52980345	0	1.00518	#NAME?	5e-05	0.00164462	Novel_lncRNA	co_expression	ENSOCUG00000006864	--	--	GO:0050896,GO:0051716,GO:0050794,GO:0007166,GO:0044763,GO:0044699,GO:0004888,GO:0007165,GO:0050789,GO:0038023,GO:0065007,GO:0004872,GO:0004871,GO:0060089,GO:0007154,GO:0023052,GO:0044700,GO:0009987,GO:0008150,GO:0005575,GO:0016021,GO:0003674,GO:0031224,GO:0044425,GO:0016020	response to stimulus,cellular response to stimulus,regulation of cellular process,cell surface receptor signaling pathway,single-organism cellular process,single-organism process,transmembrane signaling receptor activity,signal transduction,regulation of biological process,signaling receptor activity,biological regulation,receptor activity,signal transducer activity,molecular transducer activity,…	ocu04640,ocu05162,ocu05340,ocu04660,ocu05142,ocu05166	Hematopoietic cell lineage,Measles,Primary immunodeficiency,T cell receptor signaling pathway,Chagas disease (American trypanosomiasis),HTLV-I infection
LNC_000895	XLOC_045381	-	4:45634950-45640376	0.231323	6.65997	-4.84754	0.00025	0.00613872	Novel_lncRNA	co_expression	ENSOCUG00000006864	--	--	GO:0050896,GO:0051716,GO:0050794,GO:0007166,GO:0044763,GO:0044699,GO:0004888,GO:0007165,GO:0050789,GO:0038023,GO:0065007,GO:0004872,GO:0004871,GO:0060089,GO:0007154,GO:0023052,GO:0044700,GO:0009987,GO:0008150,GO:0005575,GO:0016021,GO:0003674,GO:0031224,GO:0044425,GO:0016020	response to stimulus,cellular response to stimulus,regulation of cellular process,cell surface receptor signaling pathway,single-organism cellular process,single-organism process,transmembrane signaling receptor activity,signal transduction,regulation of biological process,signaling receptor activity,biological regulation,receptor activity,signal transducer activity,molecular transducer activity,…	ocu04640,ocu05162,ocu05340,ocu04660,ocu05142,ocu05166	Hematopoietic cell lineage,Measles,Primary immunodeficiency,T cell receptor signaling pathway,Chagas disease (American trypanosomiasis),HTLV-I infection
LNC_000896	XLOC_045428	-	4:45815438-45822081	0.0988159	6.09208	-5.94605	0.0034	0.0449383	Novel_lncRNA	co_expression	ENSOCUG00000006864	--	--	GO:0050896,GO:0051716,GO:0050794,GO:0007166,GO:0044763,GO:0044699,GO:0004888,GO:0007165,GO:0050789,GO:0038023,GO:0065007,GO:0004872,GO:0004871,GO:0060089,GO:0007154,GO:0023052,GO:0044700,GO:0009987,GO:0008150,GO:0005575,GO:0016021,GO:0003674,GO:0031224,GO:0044425,GO:0016020	response to stimulus,cellular response to stimulus,regulation of cellular process,cell surface receptor signaling pathway,single-organism cellular process,single-organism process,transmembrane signaling receptor activity,signal transduction,regulation of biological process,signaling receptor activity,biological regulation,receptor activity,signal transducer activity,molecular transducer activity,…	ocu04640,ocu05162,ocu05340,ocu04660,ocu05142,ocu05166	Hematopoietic cell lineage,Measles,Primary immunodeficiency,T cell receptor signaling pathway,Chagas disease (American trypanosomiasis),HTLV-I infection
LNC_000646	XLOC_032774	-	19:49564410-49565570	0	2.92304	#NAME?	0.0002	0.00519183	Novel_lncRNA	co_location	ENSOCUG00000012776	SMURF2	SMAD specific E3 ubiquitin protein ligase 2 [Source:HGNC Symbol;Acc:HGNC:16809]	GO:0005515,GO:0005488,GO:0048519,GO:0032991,GO:0000151,GO:0048523,GO:1901165,GO:0043900,GO:2000026,GO:0048585,GO:0044424,GO:0030579,GO:0051239,GO:0061450,GO:1901163,GO:0005622,GO:0009968,GO:0023057,GO:0043234,GO:0010648,GO:0044464,GO:0023051,GO:0010646,GO:0005623,GO:0050793,GO:0005575,GO:0048583,GO:0009966,GO:0032502,GO:0007566,GO:0090287,GO:0001667,GO:2000243,GO:0040011,GO:0071310,GO:0030512,GO:…	protein binding,binding,negative regulation of biological process,macromolecular complex,ubiquitin ligase complex,negative regulation of cellular process,positive regulation of trophoblast cell migration,regulation of multi-organism process,regulation of multicellular organismal development,negative regulation of response to stimulus,intracellular part,ubiquitin-dependent SMAD protein catabolic p…	ocu04120,ocu04350,ocu04144	Ubiquitin mediated proteolysis,TGF-beta signaling pathway,Endocytosis
LNC_000141	XLOC_006934	-	11:43123528-43169040	1.64776	0	inf	5e-05	0.00164462	Novel_lncRNA	co_expression	ENSOCUG00000016507	ATP2B1	plasma membrane calcium-transporting ATPase 1 [Source:RefSeq peptide;Acc:NP_001095189]	GO:0044763,GO:0044699,GO:0071944,GO:0005886,GO:0005634,GO:0009987,GO:0005515,GO:0008150,GO:0005575,GO:0016021,GO:1901363,GO:0003674,GO:0031224,GO:0097159,GO:0005524,GO:0032559,GO:0030554,GO:0000166,GO:1901265,GO:0036094,GO:0044425,GO:0005623,GO:0044464,GO:0016020,GO:0035639,GO:0042623,GO:0032549,GO:0032550,GO:0032555,GO:0001882,GO:0001883,GO:0005488,GO:0017076,GO:0032553,GO:0016787,GO:0005576,GO:…	single-organism cellular process,single-organism process,cell periphery,plasma membrane,nucleus,cellular process,protein binding,biological_process,cellular_component,integral to membrane,heterocyclic compound binding,molecular_function,intrinsic to membrane,organic cyclic compound binding,ATP binding,adenyl ribonucleotide binding,adenyl nucleotide binding,nucleotide binding,nucleoside phosphate …	ocu04020,ocu04970,ocu04024,ocu04261,ocu04972,ocu04022	Calcium signaling pathway,Salivary secretion,cAMP signaling pathway,Adrenergic signaling in cardiomyocytes,Pancreatic secretion,cGMP-PKG signaling pathway
LNC_000855	XLOC_042760	-	4:169571-205828	1.8407	0.134786	3.77151	5e-05	0.00164462	Novel_lncRNA	co_expression	ENSOCUG00000014277	ABHD4	abhydrolase domain containing 4 [Source:HGNC Symbol;Acc:HGNC:20154]	--	--	--	--
LNC_001523	XLOC_072977	-	GL019153:103737-113315	0.905148	2.69276	-1.57286	0.0024	0.0352066	Novel_lncRNA	co_location	ENSOCUG00000025234	--	--	GO:0005515,GO:0005488,GO:0044446,GO:1901363,GO:0044422,GO:0097159,GO:0032991,GO:0005938,GO:0043228,GO:0043232,GO:0001725,GO:0031105,GO:0032432,GO:0042641,GO:0044424,GO:0032156,GO:0036094,GO:0043231,GO:0005622,GO:0072372,GO:0000166,GO:1901265,GO:0043234,GO:0043229,GO:0044448,GO:0043227,GO:0005929,GO:0044464,GO:0005623,GO:0005575,GO:0031513,GO:0044463,GO:0043226,GO:0051291,GO:0032555,GO:0017076,GO:…	protein binding,binding,intracellular organelle part,heterocyclic compound binding,organelle part,organic cyclic compound binding,macromolecular complex,cell cortex,non-membrane-bounded organelle,intracellular non-membrane-bounded organelle,stress fiber,septin complex,actin filament bundle,actomyosin,intracellular part,septin cytoskeleton,small molecule binding,intracellular membrane-bounded orga…	ocu05100	Bacterial invasion of epithelial cells
LNC_000952	XLOC_047805	-	6:24973049-24976630	2.63974	20.369	-2.94791	5e-05	0.00164462	Novel_lncRNA	co_location	ENSOCUG00000025441	--	--	--	--	--	--
LNC_000955	XLOC_047983	-	7:15414328-15439223	0.144105	1.71893	-3.57632	0.0014	0.0230724	Novel_lncRNA	co_location	ENSOCUG00000011749	AHCYL2	adenosylhomocysteinase like 2 [Source:HGNC Symbol;Acc:HGNC:22204]	GO:0005515,GO:0005488,GO:0004013,GO:0016802,GO:0044424,GO:0016801,GO:0043231,GO:0005622,GO:0043229,GO:0043227,GO:0044464,GO:0005623,GO:0005575,GO:0006730,GO:0043226,GO:0043005,GO:0042995,GO:0016787,GO:0097458,GO:0044710,GO:0044444,GO:0005829,GO:0003824,GO:0003674,GO:0005737,GO:0044281,GO:0008152,GO:0044237,GO:0009987,GO:0008150	protein binding,binding,adenosylhomocysteinase activity,trialkylsulfonium hydrolase activity,intracellular part,hydrolase activity, acting on ether bonds,intracellular membrane-bounded organelle,intracellular,intracellular organelle,membrane-bounded organelle,cell part,cell,cellular_component,one-carbon metabolic process,organelle,neuron projection,cell projection,hydrolase activity,neuron part,s…	ocu00270,ocu01100	Cysteine and methionine metabolism,Metabolic pathways
LNC_000610	XLOC_030217	-	18:11957446-11966870	3.92393	1.22853	1.67537	0.00075	0.0143557	Novel_lncRNA	co_expression	ENSOCUG00000004128	TBC1D9B	TBC1 domain family member 9B [Source:HGNC Symbol;Acc:HGNC:29097]	GO:0005515,GO:0005509,GO:0003674,GO:0005488,GO:0046872,GO:0043169,GO:0043167	protein binding,calcium ion binding,molecular_function,binding,metal ion binding,cation binding,ion binding	--	--
LNC_000822	XLOC_040573	-	3:148631783-148638124	1.1898	0	inf	5e-05	0.00164462	Novel_lncRNA	co_location	ENSOCUG00000025434	--	--	--	--	ocu05320,ocu04918	Autoimmune thyroid disease,Thyroid hormone synthesis
LNC_000505	XLOC_025091	-	16:10853110-10860447	0.410511	11.3028	-4.78312	0.0001	0.0029475	Novel_lncRNA	co_location	ENSOCUG00000009863	PRKCQ	protein kinase C theta [Source:HGNC Symbol;Acc:HGNC:9410]	GO:0002376,GO:0006955,GO:0045321,GO:0001775,GO:0002682,GO:0002684,GO:0046649,GO:0050865,GO:0002694,GO:0001816,GO:0042110,GO:0051249,GO:0001817,GO:0051239,GO:0051251,GO:0050896,GO:0002696,GO:0070887,GO:0050867,GO:0010033,GO:0050870,GO:0050863,GO:0006950,GO:0048584,GO:0050778,GO:0044459,GO:0050776,GO:0048518,GO:0044699,GO:0046651,GO:0009611,GO:0032943,GO:0070661,GO:0060326,GO:0044763,GO:0016477,GO:…	immune system process,immune response,leukocyte activation,cell activation,regulation of immune system process,positive regulation of immune system process,lymphocyte activation,regulation of cell activation,regulation of leukocyte activation,cytokine production,T cell activation,regulation of lymphocyte activation,regulation of cytokine production,regulation of multicellular organismal process,p…	ocu04660,ocu05162,ocu04064,ocu04750,ocu04530,ocu04920,ocu04270	T cell receptor signaling pathway,Measles,NF-kappa B signaling pathway,Inflammatory mediator regulation of TRP channels,Tight junction,Adipocytokine signaling pathway,Vascular smooth muscle contraction
LNC_000502	XLOC_024947	-	16:72314291-72369758	2.68187	32.8445	-3.61434	0.0001	0.0029475	Novel_lncRNA	co_expression	ENSOCUG00000006864	--	--	GO:0050896,GO:0051716,GO:0050794,GO:0007166,GO:0044763,GO:0044699,GO:0004888,GO:0007165,GO:0050789,GO:0038023,GO:0065007,GO:0004872,GO:0004871,GO:0060089,GO:0007154,GO:0023052,GO:0044700,GO:0009987,GO:0008150,GO:0005575,GO:0016021,GO:0003674,GO:0031224,GO:0044425,GO:0016020	response to stimulus,cellular response to stimulus,regulation of cellular process,cell surface receptor signaling pathway,single-organism cellular process,single-organism process,transmembrane signaling receptor activity,signal transduction,regulation of biological process,signaling receptor activity,biological regulation,receptor activity,signal transducer activity,molecular transducer activity,…	ocu04640,ocu05162,ocu05340,ocu04660,ocu05142,ocu05166	Hematopoietic cell lineage,Measles,Primary immunodeficiency,T cell receptor signaling pathway,Chagas disease (American trypanosomiasis),HTLV-I infection
LNC_000085	XLOC_004699	-	1:169170329-169182076	0.0453328	1.78183	-5.29666	5e-05	0.00164462	Novel_lncRNA	co_expression	ENSOCUG00000006864	--	--	GO:0050896,GO:0051716,GO:0050794,GO:0007166,GO:0044763,GO:0044699,GO:0004888,GO:0007165,GO:0050789,GO:0038023,GO:0065007,GO:0004872,GO:0004871,GO:0060089,GO:0007154,GO:0023052,GO:0044700,GO:0009987,GO:0008150,GO:0005575,GO:0016021,GO:0003674,GO:0031224,GO:0044425,GO:0016020	response to stimulus,cellular response to stimulus,regulation of cellular process,cell surface receptor signaling pathway,single-organism cellular process,single-organism process,transmembrane signaling receptor activity,signal transduction,regulation of biological process,signaling receptor activity,biological regulation,receptor activity,signal transducer activity,molecular transducer activity,…	ocu04640,ocu05162,ocu05340,ocu04660,ocu05142,ocu05166	Hematopoietic cell lineage,Measles,Primary immunodeficiency,T cell receptor signaling pathway,Chagas disease (American trypanosomiasis),HTLV-I infection
LNC_000950	XLOC_047597	-	6:24018800-24031420	1.2323	4.51815	-1.87438	0.00045	0.00964798	Novel_lncRNA	co_expression	ENSOCUG00000006864	--	--	GO:0050896,GO:0051716,GO:0050794,GO:0007166,GO:0044763,GO:0044699,GO:0004888,GO:0007165,GO:0050789,GO:0038023,GO:0065007,GO:0004872,GO:0004871,GO:0060089,GO:0007154,GO:0023052,GO:0044700,GO:0009987,GO:0008150,GO:0005575,GO:0016021,GO:0003674,GO:0031224,GO:0044425,GO:0016020	response to stimulus,cellular response to stimulus,regulation of cellular process,cell surface receptor signaling pathway,single-organism cellular process,single-organism process,transmembrane signaling receptor activity,signal transduction,regulation of biological process,signaling receptor activity,biological regulation,receptor activity,signal transducer activity,molecular transducer activity,…	ocu04640,ocu05162,ocu05340,ocu04660,ocu05142,ocu05166	Hematopoietic cell lineage,Measles,Primary immunodeficiency,T cell receptor signaling pathway,Chagas disease (American trypanosomiasis),HTLV-I infection
LNC_001063	XLOC_053607	-	8:25169716-25175834	4.86841	18.697	-1.94128	0.00025	0.00613872	Novel_lncRNA	co_location	ENSOCUG00000012361	ATF7IP	activating transcription factor 7 interacting protein [Source:HGNC Symbol;Acc:HGNC:20092]	GO:0005515,GO:0005488,GO:0044446,GO:0044422,GO:0048519,GO:0032991,GO:0048523,GO:0045898,GO:0006259,GO:0051123,GO:0006305,GO:0006306,GO:0044424,GO:0000122,GO:0043414,GO:0070897,GO:0044728,GO:0040029,GO:0043231,GO:0005622,GO:0006304,GO:0060260,GO:0032259,GO:0043234,GO:0043229,GO:0005634,GO:0043227,GO:2000142,GO:0016887,GO:0044464,GO:0065004,GO:0005623,GO:0010629,GO:0005575,GO:0045892,GO:0071824,GO:…	protein binding,binding,intracellular organelle part,organelle part,negative regulation of biological process,macromolecular complex,negative regulation of cellular process,regulation of RNA polymerase II transcriptional preinitiation complex assembly,DNA metabolic process,RNA polymerase II transcriptional preinitiation complex assembly,DNA alkylation,DNA methylation,intracellular part,negative r…	--	--
LNC_000236	XLOC_011751	-	12:101524603-101573106	0.565594	2.15016	-1.92661	0.0038	0.0488831	Novel_lncRNA	co_expression	ENSOCUG00000006864	--	--	GO:0050896,GO:0051716,GO:0050794,GO:0007166,GO:0044763,GO:0044699,GO:0004888,GO:0007165,GO:0050789,GO:0038023,GO:0065007,GO:0004872,GO:0004871,GO:0060089,GO:0007154,GO:0023052,GO:0044700,GO:0009987,GO:0008150,GO:0005575,GO:0016021,GO:0003674,GO:0031224,GO:0044425,GO:0016020	response to stimulus,cellular response to stimulus,regulation of cellular process,cell surface receptor signaling pathway,single-organism cellular process,single-organism process,transmembrane signaling receptor activity,signal transduction,regulation of biological process,signaling receptor activity,biological regulation,receptor activity,signal transducer activity,molecular transducer activity,…	ocu04640,ocu05162,ocu05340,ocu04660,ocu05142,ocu05166	Hematopoietic cell lineage,Measles,Primary immunodeficiency,T cell receptor signaling pathway,Chagas disease (American trypanosomiasis),HTLV-I infection
LNC_000232	XLOC_011389	-	12:73609898-73866599	0	2.23255	#NAME?	0.00025	0.00613872	Novel_lncRNA	co_location	ENSOCUG00000008386	CGA	Glycoprotein hormones alpha chain [Source:UniProtKB/Swiss-Prot;Acc:P07474]	GO:0005515,GO:0005488,GO:0048519,GO:0042403,GO:0048589,GO:0030878,GO:0035270,GO:0032275,GO:0046884,GO:0046620,GO:0018958,GO:0051239,GO:0032274,GO:0048732,GO:0046621,GO:0035265,GO:0006590,GO:0005575,GO:0042445,GO:0060986,GO:1901615,GO:0032502,GO:0006575,GO:0040007,GO:0071310,GO:0032870,GO:0040008,GO:0044767,GO:0045926,GO:0007275,GO:0048513,GO:0010033,GO:0071495,GO:0005576,GO:0050886,GO:0048731,GO:…	protein binding,binding,negative regulation of biological process,thyroid hormone metabolic process,developmental growth,thyroid gland development,endocrine system development,luteinizing hormone secretion,follicle-stimulating hormone secretion,regulation of organ growth,phenol-containing compound metabolic process,regulation of multicellular organismal process,gonadotropin secretion,gland develo…	ocu05320,ocu04918,ocu04913,ocu04917,ocu04912,ocu04080	Autoimmune thyroid disease,Thyroid hormone synthesis,Ovarian steroidogenesis,Prolactin signaling pathway,GnRH signaling pathway,Neuroactive ligand-receptor interaction
LNC_000008	XLOC_000522	-	1:49967883-49980417	6.53945	1.68695	1.95475	0.00325	0.0433889	Novel_lncRNA	co_location	ENSOCUG00000013264	--	--	GO:0015370,GO:0017153,GO:0015294,GO:0015293,GO:0046943,GO:0005310,GO:0005342,GO:0015296,GO:0005343,GO:0008514,GO:0005575,GO:0015081,GO:0006835,GO:0015291,GO:0015077,GO:0015849,GO:0046942,GO:0071702,GO:0008509,GO:0006820,GO:0015711,GO:0022804,GO:0022890,GO:0044765,GO:0016020,GO:0046873,GO:0022892,GO:0008324,GO:0003674,GO:0044425,GO:0051234,GO:0006810,GO:0005215,GO:0044763,GO:0015075,GO:0016021,GO:…	solute:sodium symporter activity,sodium:dicarboxylate symporter activity,solute:cation symporter activity,symporter activity,carboxylic acid transmembrane transporter activity,dicarboxylic acid transmembrane transporter activity,organic acid transmembrane transporter activity,anion:cation symporter activity,organic acid:sodium symporter activity,organic anion transmembrane transporter activity,ce…	ocu04974,ocu04724	Protein digestion and absorption,Glutamatergic synapse
LNC_001570	XLOC_074778	-	GL019639:455-11499	135.829	27.7947	2.28891	0.00265	0.0377583	Novel_lncRNA	co_expression	ENSOCUG00000027925	--	--	GO:0005575,GO:0016021,GO:0031224,GO:0044425,GO:0016020	cellular_component,integral to membrane,intrinsic to membrane,membrane part,membrane	ocu04380	Osteoclast differentiation
LNC_000625	XLOC_031140	-	19:5549593-5560917	0	1.69134	#NAME?	5e-05	0.00164462	Novel_lncRNA	co_location	ENSOCUG00000012432	HS3ST3B1	heparan sulfate-glucosamine 3-sulfotransferase 3B1 [Source:HGNC Symbol;Acc:HGNC:5198]	GO:0003674,GO:0003824,GO:0008146,GO:0016782,GO:0016740	molecular_function,catalytic activity,sulfotransferase activity,transferase activity, transferring sulfur-containing groups,transferase activity	ocu00534	Glycosaminoglycan biosynthesis - heparan sulfate / heparin
LNC_000987	XLOC_049534	-	7:144341494-144351560	0	2.03965	#NAME?	5e-05	0.00164462	Novel_lncRNA	co_location	ENSOCUG00000016134	CD28	CD28 molecule [Source:HGNC Symbol;Acc:HGNC:1653]	GO:0002376,GO:0006955,GO:0045321,GO:0001775,GO:0002682,GO:0002684,GO:0046649,GO:0002521,GO:0050865,GO:0002694,GO:0002520,GO:0001816,GO:0042110,GO:0030097,GO:0048534,GO:0009986,GO:0051249,GO:0006952,GO:0001817,GO:0051239,GO:0030098,GO:0051251,GO:0050896,GO:0002696,GO:0050867,GO:0050870,GO:0050863,GO:0006950,GO:0048584,GO:0048731,GO:0050778,GO:0044459,GO:0050776,GO:0007275,GO:0030217,GO:0006954,GO:…	immune system process,immune response,leukocyte activation,cell activation,regulation of immune system process,positive regulation of immune system process,lymphocyte activation,leukocyte differentiation,regulation of cell activation,regulation of leukocyte activation,immune system development,cytokine production,T cell activation,hemopoiesis,hematopoietic or lymphoid organ development,cell surfa…	ocu05322,ocu05323,ocu04514,ocu04672,ocu04660,ocu05330,ocu05162,ocu05320,ocu05332,ocu05416,ocu04940	Systemic lupus erythematosus,Rheumatoid arthritis,Cell adhesion molecules (CAMs),Intestinal immune network for IgA production,T cell receptor signaling pathway,Allograft rejection,Measles,Autoimmune thyroid disease,Graft-versus-host disease,Viral myocarditis,Type I diabetes mellitus
LNC_000984	XLOC_049430	-	7:138685895-138699131	0.122166	2.33117	-4.25414	5e-05	0.00164462	Novel_lncRNA	co_location	ENSOCUG00000013978	PLCL1	phospholipase C like 1 [Source:HGNC Symbol;Acc:HGNC:9063]	GO:0051239,GO:0050896,GO:0044699,GO:0044763,GO:0005575,GO:0005515,GO:0044707,GO:0071944,GO:0032501,GO:0051716,GO:0005886,GO:0006468,GO:0005102,GO:0023051,GO:0005488,GO:0010646,GO:0016020,GO:0065007,GO:0044093,GO:0050794,GO:0035556,GO:0007165,GO:0050789,GO:0065009,GO:0016310,GO:0031399,GO:0001932,GO:0051246,GO:0051098,GO:0042325,GO:0043393,GO:0007154,GO:0044700,GO:0023052,GO:0018193,GO:0032268,GO:…	regulation of multicellular organismal process,response to stimulus,single-organism process,single-organism cellular process,cellular_component,protein binding,single-multicellular organism process,cell periphery,multicellular organismal process,cellular response to stimulus,plasma membrane,protein phosphorylation,receptor binding,regulation of signaling,binding,regulation of cell communication,m…	ocu04727	GABAergic synapse
LNC_000478	XLOC_023913	-	16:4880381-4893559	1.27751	0.0591874	4.4319	5e-05	0.00164462	Novel_lncRNA	co_location	ENSOCUG00000014102	KIAA1462	KIAA1462 [Source:HGNC Symbol;Acc:HGNC:29283]	GO:0030054,GO:0005575,GO:0005911	cell junction,cellular_component,cell-cell junction	--	--
