# Supplementary material for: Functional lncRNA-miRNA-mRNA networks in rabbit carotid atherosclerosis
Source: Aging (Albany NY). 2020 Feb 11;12(3):2798–813. doi: 10.18632/aging.102778 (PMC7041763; doi:10.18632/aging.102778)
Supplement: Supplementary Table 2 [file aging-12-102778-s001..xls]

## Sheet: Sheet1
Supplementary Table 2. Significantly DE miRNA transcripts between AS and control rabbits.
sRNA	AS_readcount	Control_readcount	log2FoldChange	p-value	q-value
ocu-miR-12092-5p	66.2537	2.04091	3.5766	5.0367e-08	1.0091e-05
ocu-miR-34a-5p	1071.92	209.059	2.1816	8.3248e-08	1.0091e-05
ocu-miR-411-5p	1248.6	251.558	2.1445	8.4802e-08	1.0091e-05
ocu-miR-204-5p	285.819	1926.54	-2.4656	1.7641e-07	1.5745e-05
ocu-miR-136-3p	865.39	257.646	1.6557	1.9489e-06	0.00012739
ocu-miR-424-5p	279.579	28.4344	2.7254	2.141e-06	0.00012739
ocu-miR-199a-5p	23735.8	7297	1.6118	3.2482e-06	0.00016566
ocu-miR-889-3p	2146.51	504.236	1.9241	4.4029e-06	0.00019648
ocu-miR-21-5p	257557	58301.4	1.9544	8.3673e-06	0.00027826
ocu-miR-450a-5p	930.138	112.456	2.5477	7.7404e-06	0.00027826
ocu-miR-542-3p	1294.95	143.523	2.6123	8.5738e-06	0.00027826
ocu-miR-299-3p	344.262	106.822	1.5849	1.9974e-05	0.00059421
ocu-miR-127-5p	585.51	145.249	1.8409	2.3056e-05	0.00063314
ocu-miR-214-3p	2639.62	748.832	1.6856	2.8191e-05	0.00067868
ocu-miR-214-5p	543.21	148.699	1.7295	2.8516e-05	0.00067868
ocu-miR-182-5p	164.131	1173.46	-2.3559	4.9238e-05	0.0010986
ocu-miR-335-5p	92.5103	16.8331	2.1219	5.5968e-05	0.0011753
ocu-miR-25-3p	3367.91	16672.8	-2.0263	6.2185e-05	0.0012333
novel_1	23547.7	91102.6	-1.7408	0.00029186	0.0054839
ocu-miR-424-3p	78.3408	13.8763	2.0576	0.00034449	0.0061491
ocu-miR-154-5p	44.982	9.70629	1.9327	0.00038315	0.0065135
ocu-miR-18a-3p	0.242561	8.78514	-2.6113	0.00056608	0.009186
ocu-miR-183-5p	76.7913	442.229	-2.0457	0.0007577	0.011761
ocu-miR-106b-3p	303.157	1035.84	-1.576	0.0011634	0.016069
ocu-miR-15b-3p	20.9797	98.3286	-1.8664	0.0011314	0.016069
ocu-miR-7a-5p	3390.18	10761.6	-1.5012	0.0011703	0.016069
ocu-miR-1-3p	4828.55	21114.3	-1.7998	0.0012747	0.016854
ocu-miR-497-5p	295.763	94.9221	1.4716	0.0016099	0.020395
ocu-miR-655-3p	123.959	38.9699	1.4848	0.0016567	0.020395
ocu-miR-377-3p	16.5492	2.46851	2.0416	0.0018171	0.021623
ocu-miR-12092-3p	8.88334	0.327168	2.3317	0.0020349	0.022014
ocu-miR-190a-5p	9.62566	54.2156	-1.9655	0.001935	0.022014
ocu-miR-96-5p	13.3027	70.7456	-1.9302	0.0020203	0.022014
ocu-miR-656-3p	87.233	26.2378	1.5107	0.0022757	0.023894
ocu-miR-363-5p	0.92903	10.0385	-2.2241	0.0024789	0.024302
ocu-miR-672-5p	1.22892	14.5114	-2.2287	0.0024247	0.024302
ocu-miR-92a-3p	2990.16	12051	-1.6966	0.0025187	0.024302
ocu-miR-93-5p	1206.6	4306.49	-1.5836	0.0029351	0.027575
ocu-miR-487a-3p	19.2442	3.68372	1.8391	0.0035703	0.032682
ocu-miR-185-5p	1523.23	3835.03	-1.2227	0.0039753	0.035479
ocu-miR-199a-3p	45880.2	18540	1.2001	0.0047062	0.040003
ocu-miR-486-5p	364.287	1500.41	-1.6771	0.0046049	0.040003
ocu-miR-487b-3p	182.891	70.2874	1.2574	0.0051386	0.04232
ocu-miR-7a-3p	46.5613	131.276	-1.3364	0.0052159	0.04232
ocu-miR-363-3p	475.006	2080.49	-1.7054	0.0057813	0.045865
ocu-miR-539-3p	18.2109	4.165	1.6928	0.0059987	0.046555
ocu-miR-541-5p	4.74369	0	2.119	0.0061875	0.046999
ocu-miR-134-5p	108.451	29.7457	1.5713	0.006615	0.048195
ocu-miR-145-3p	1753.38	5151.39	-1.368	0.0065453	0.048195
ocu-miR-450a-2-3p	9.6866	0.981503	1.9681	0.0067898	0.048479
