# Supplementary material for: Functional lncRNA-miRNA-mRNA networks in rabbit carotid atherosclerosis
Source: Aging (Albany NY). 2020 Feb 11;12(3):2798–813. doi: 10.18632/aging.102778 (PMC7041763; doi:10.18632/aging.102778)
Supplement: Supplementary Table 3 [file aging-12-102778-s008..xls]

## Sheet: Sheet1
Supplementary Table 3. Significantly DE mRNA transcripts between AS and control rabbits.
transcript_id	gene_id	gene_name	gene_location	AS_FPKM	Control_FPKM	log2(foldchange)	pvalue	qvalue	Gene_description	GO_id	GO_description	KO_id	KO_pathway
ENSOCUT00000021509	ENSOCUG00000023515	-	3:38738612-38740667	0	1.3932	#NAME?	5e-05	0.00164462	--	GO:0048518,GO:0044699,GO:0044763,GO:0048522,GO:0005575,GO:0043228,GO:0043232,GO:0065007,GO:0050794,GO:0005856,GO:0050789,GO:0044430,GO:0016043,GO:0065008,GO:0071840,GO:0043226,GO:0008150,GO:0015629,GO:0007010,GO:0051128,GO:0051130,GO:0051493,GO:0005623,GO:0044464,GO:0071822,GO:0009987,GO:0033043,GO:0043933,GO:0051258,GO:0006461,GO:0070271,GO:0032970,GO:0032956,GO:0010638,GO:0005885,GO:0044424,GO:…	positive regulation of biological process,single-organism process,single-organism cellular process,positive regulation of cellular process,cellular_component,non-membrane-bounded organelle,intracellular non-membrane-bounded organelle,biological regulation,regulation of cellular process,cytoskeleton,regulation of biological process,cytoskeletal part,cellular component organization,regulation of bi…	ocu05132,ocu04666,ocu05100,ocu04810	Salmonella infection,Fc gamma R-mediated phagocytosis,Bacterial invasion of epithelial cells,Regulation of actin cytoskeleton
ENSOCUT00000022366	ENSOCUG00000023019	FOSB	GL019006:121962-124101	2.01775	50.6721	-4.65037	5e-05	0.00164462	--	GO:0050896,GO:0070887,GO:0048518,GO:0044699,GO:0044763,GO:0048522,GO:0005575,GO:0042221,GO:0051716,GO:0005488,GO:0065007,GO:0050794,GO:0050789,GO:0003677,GO:0071241,GO:0071248,GO:0010038,GO:0010035,GO:0009893,GO:0043226,GO:0008150,GO:0043227,GO:0031325,GO:0071277,GO:0010604,GO:0051592,GO:0005623,GO:0044464,GO:0000982,GO:0009987,GO:0000981,GO:0080090,GO:0019222,GO:0003674,GO:0031323,GO:0044424,GO:…	response to stimulus,cellular response to chemical stimulus,positive regulation of biological process,single-organism process,single-organism cellular process,positive regulation of cellular process,cellular_component,response to chemical stimulus,cellular response to stimulus,binding,biological regulation,regulation of cellular process,regulation of biological process,DNA binding,cellular respon…	ocu05034,ocu04380,ocu05031,ocu05030	Alcoholism,Osteoclast differentiation,Amphetamine addiction,Cocaine addiction
ENSOCUT00000010011	ENSOCUG00000010009	EPX	19:30020961-30043919	0.737637	46.9889	-5.99327	5e-05	0.00164462	eosinophil peroxidase [Source:HGNC Symbol;Acc:HGNC:3423]	GO:0002376,GO:0044421,GO:0005576,GO:0001816,GO:0006952,GO:0001817,GO:0051239,GO:0050896,GO:0031982,GO:0031988,GO:0006950,GO:0070062,GO:0043230,GO:0065010,GO:0048518,GO:0044699,GO:0051707,GO:0009607,GO:0044763,GO:0016477,GO:0005575,GO:0040011,GO:0048870,GO:0051674,GO:0048519,GO:0051179,GO:0050900,GO:0006928,GO:0044707,GO:0051704,GO:0001819,GO:0032501,GO:0051240,GO:0032633,GO:0005488,GO:0001818,GO:…	immune system process,extracellular region part,extracellular region,cytokine production,defense response,regulation of cytokine production,regulation of multicellular organismal process,response to stimulus,vesicle,membrane-bounded vesicle,response to stress,extracellular vesicular exosome,extracellular organelle,extracellular membrane-bounded organelle,positive regulation of biological process,…	ocu05310	Asthma
ENSOCUT00000010716	ENSOCUG00000010718	TIMP1	X:32645153-32703324	67.4304	14.0924	2.25849	5e-05	0.00164462	metalloproteinase inhibitor 1 precursor [Source:RefSeq peptide;Acc:NP_001075701]	GO:0044421,GO:0005576,GO:0051239,GO:0050896,GO:0031982,GO:0031988,GO:0007275,GO:0070062,GO:0043230,GO:0065010,GO:0048518,GO:0044699,GO:0005615,GO:0031012,GO:0044763,GO:0016477,GO:0048522,GO:0048583,GO:0032502,GO:2000026,GO:0005575,GO:0008283,GO:0005515,GO:0040011,GO:0048870,GO:0051674,GO:0048519,GO:0051179,GO:0040012,GO:0005578,GO:0030334,GO:0006928,GO:0042127,GO:0044707,GO:2000145,GO:0051704,GO:…	extracellular region part,extracellular region,regulation of multicellular organismal process,response to stimulus,vesicle,membrane-bounded vesicle,multicellular organismal development,extracellular vesicular exosome,extracellular organelle,extracellular membrane-bounded organelle,positive regulation of biological process,single-organism process,extracellular space,extracellular matrix,single-org…	ocu04066	HIF-1 signaling pathway
ENSOCUT00000004120	ENSOCUG00000004119	GUSB	GL018788:574862-595986	143.584	12.2586	3.55003	5e-05	0.00164462	glucuronidase beta [Source:HGNC Symbol;Acc:HGNC:4696]	GO:0044421,GO:0005576,GO:0031982,GO:0031988,GO:0070062,GO:0043230,GO:0065010,GO:0005615,GO:0005575,GO:0005515,GO:0005764,GO:0000323,GO:0005102,GO:0005488,GO:0005773,GO:0016020,GO:0004553,GO:0016787,GO:0019904,GO:0016798,GO:0043226,GO:0008150,GO:0043227,GO:0005623,GO:0044464,GO:0005737,GO:0004566,GO:0003674,GO:0044424,GO:0005622,GO:0043229,GO:0003824,GO:0005975,GO:0043231,GO:0044444,GO:0044238,GO:…	extracellular region part,extracellular region,vesicle,membrane-bounded vesicle,extracellular vesicular exosome,extracellular organelle,extracellular membrane-bounded organelle,extracellular space,cellular_component,protein binding,lysosome,lytic vacuole,receptor binding,binding,vacuole,membrane,hydrolase activity, hydrolyzing O-glycosyl compounds,hydrolase activity,protein domain specific bindin…	ocu04142,ocu00531,ocu00983,ocu00040,ocu00860,ocu00500,ocu01100	Lysosome,Glycosaminoglycan degradation,Drug metabolism - other enzymes,Pentose and glucuronate interconversions,Porphyrin and chlorophyll metabolism,Starch and sucrose metabolism,Metabolic pathways
ENSOCUT00000003367	ENSOCUG00000003365	INPP4A	2:93575802-93716698	14.6984	60.8357	-2.04926	5e-05	0.00164462	inositol polyphosphate-4-phosphatase type I A [Source:HGNC Symbol;Acc:HGNC:6074]	GO:0005515,GO:0005488,GO:0003674	protein binding,binding,molecular_function	ocu04070,ocu00562,ocu01100	Phosphatidylinositol signaling system,Inositol phosphate metabolism,Metabolic pathways
ENSOCUT00000031476	ENSOCUG00000004314	TRPM1	17:83052800-83126041	16.3387	1.88462	3.11594	5e-05	0.00164462	transient receptor potential cation channel subfamily M member 1 [Source:HGNC Symbol;Acc:HGNC:7146]	GO:0050896,GO:0048731,GO:0007275,GO:0044699,GO:0048513,GO:0044767,GO:0048856,GO:0044763,GO:0032502,GO:0005575,GO:0051179,GO:0030154,GO:0044707,GO:0032501,GO:0051716,GO:0048869,GO:0016020,GO:0065007,GO:0016021,GO:0044765,GO:0031224,GO:0050794,GO:0007165,GO:0050789,GO:0044425,GO:0051234,GO:0009653,GO:0006810,GO:0007154,GO:0044700,GO:0023052,GO:0007166,GO:0051641,GO:0016043,GO:0065008,GO:0009628,GO:…	response to stimulus,system development,multicellular organismal development,single-organism process,organ development,single-organism developmental process,anatomical structure development,single-organism cellular process,developmental process,cellular_component,localization,cell differentiation,single-multicellular organism process,multicellular organismal process,cellular response to stimulus,…	--	--
ENSOCUT00000027024	ENSOCUG00000023811	-	13:42188650-42189061	31.829	363.967	-3.5154	5e-05	0.00164462	histone cluster 2, H3d [Source:HGNC Symbol;Acc:HGNC:25311]	GO:0000786,GO:0032993,GO:0044421,GO:0005576,GO:0046982,GO:0031982,GO:0031988,GO:0046983,GO:0070062,GO:0043230,GO:0065010,GO:0044699,GO:0000785,GO:0044427,GO:0044763,GO:0005694,GO:0005575,GO:0005515,GO:0005488,GO:0043228,GO:0043232,GO:0003677,GO:0006323,GO:0071103,GO:0006259,GO:0016043,GO:0071840,GO:0006333,GO:0031497,GO:0006334,GO:0043226,GO:0008150,GO:0042393,GO:0065004,GO:0043227,GO:0034728,GO:…	nucleosome,protein-DNA complex,extracellular region part,extracellular region,protein heterodimerization activity,vesicle,membrane-bounded vesicle,protein dimerization activity,extracellular vesicular exosome,extracellular organelle,extracellular membrane-bounded organelle,single-organism process,chromatin,chromosomal part,single-organism cellular process,chromosome,cellular_component,protein bin…	ocu05322,ocu05034,ocu05202	Systemic lupus erythematosus,Alcoholism,Transcriptional misregulation in cancer
ENSOCUT00000008471	ENSOCUG00000008474	CD2	13:47551879-47565052	2.50299	99.1625	-5.30807	5e-05	0.00164462	CD2 molecule [Source:HGNC Symbol;Acc:HGNC:1639]	GO:0005576,GO:0001816,GO:0009986,GO:0001817,GO:0051239,GO:0044459,GO:0046983,GO:0048518,GO:0044699,GO:0044763,GO:0009897,GO:0048522,GO:0005575,GO:0005515,GO:0009306,GO:0051179,GO:0071706,GO:0032940,GO:0044707,GO:0032879,GO:0001819,GO:0032640,GO:0032680,GO:0071944,GO:0022610,GO:0032501,GO:0050663,GO:0050708,GO:0005886,GO:0007155,GO:0051240,GO:0046903,GO:0050707,GO:0005102,GO:0051223,GO:0032880,GO:…	extracellular region,cytokine production,cell surface,regulation of cytokine production,regulation of multicellular organismal process,plasma membrane part,protein dimerization activity,positive regulation of biological process,single-organism process,single-organism cellular process,external side of plasma membrane,positive regulation of cellular process,cellular_component,protein binding,protei…	ocu04640,ocu04514	Hematopoietic cell lineage,Cell adhesion molecules (CAMs)
ENSOCUT00000011353	ENSOCUG00000011355	SCPEP1	19:31071905-31099890	364.522	100.486	1.85901	5e-05	0.00164462	serine carboxypeptidase 1 [Source:HGNC Symbol;Acc:HGNC:29507]	GO:0044421,GO:0005576,GO:0051239,GO:0031982,GO:0031988,GO:0070062,GO:0043230,GO:0065010,GO:0048518,GO:0044699,GO:0005575,GO:0044707,GO:0032501,GO:0051240,GO:0065007,GO:0050789,GO:0016787,GO:0008233,GO:0065008,GO:0017171,GO:0070011,GO:0008236,GO:0043226,GO:0008150,GO:0043227,GO:0044057,GO:0003013,GO:0006508,GO:0008015,GO:0003674,GO:0004180,GO:0008238,GO:0008217,GO:0004185,GO:0019538,GO:0045776,GO:…	extracellular region part,extracellular region,regulation of multicellular organismal process,vesicle,membrane-bounded vesicle,extracellular vesicular exosome,extracellular organelle,extracellular membrane-bounded organelle,positive regulation of biological process,single-organism process,cellular_component,single-multicellular organism process,multicellular organismal process,positive regulation…	--	--
ENSOCUT00000012911	ENSOCUG00000012911	CD4	8:32816216-32841362	1.83717	113.539	-5.94956	5e-05	0.00164462	CD4 molecule [Source:HGNC Symbol;Acc:HGNC:1678]	GO:0002376,GO:0006955,GO:0045321,GO:0001775,GO:0002682,GO:0002684,GO:0046649,GO:0002521,GO:0050865,GO:0002694,GO:0002520,GO:0001816,GO:0042110,GO:0030097,GO:0048534,GO:0009986,GO:0051249,GO:0006952,GO:0030098,GO:0051251,GO:0050896,GO:0002696,GO:0050867,GO:0050870,GO:0050863,GO:0006950,GO:0048584,GO:0009617,GO:0048731,GO:0050778,GO:0044459,GO:0050776,GO:0007275,GO:0046983,GO:0030217,GO:0048518,GO:…	immune system process,immune response,leukocyte activation,cell activation,regulation of immune system process,positive regulation of immune system process,lymphocyte activation,leukocyte differentiation,regulation of cell activation,regulation of leukocyte activation,immune system development,cytokine production,T cell activation,hemopoiesis,hematopoietic or lymphoid organ development,cell surfa…	ocu04640,ocu05340,ocu04514,ocu04660,ocu04612	Hematopoietic cell lineage,Primary immunodeficiency,Cell adhesion molecules (CAMs),T cell receptor signaling pathway,Antigen processing and presentation
ENSOCUT00000016802	ENSOCUG00000016798	CLEC7A	8:28705477-28720714	20.4065	1.47957	3.78578	5e-05	0.00164462	C-type lectin domain family 7 member A [Source:HGNC Symbol;Acc:HGNC:14558]	GO:0002376,GO:0006955,GO:0045321,GO:0001775,GO:0002682,GO:0002684,GO:0006952,GO:0050896,GO:0010033,GO:0006950,GO:0048584,GO:0050778,GO:0050776,GO:0048518,GO:0044699,GO:0002764,GO:0051707,GO:0009607,GO:0002757,GO:0044763,GO:0002253,GO:0071216,GO:0045087,GO:0048583,GO:0005575,GO:0005515,GO:0042221,GO:0031349,GO:0051179,GO:0044707,GO:0051704,GO:0032501,GO:0045089,GO:0051716,GO:0045088,GO:0002252,GO:…	immune system process,immune response,leukocyte activation,cell activation,regulation of immune system process,positive regulation of immune system process,defense response,response to stimulus,response to organic substance,response to stress,positive regulation of response to stimulus,positive regulation of immune response,regulation of immune response,positive regulation of biological process,s…	ocu05152,ocu04145	Tuberculosis,Phagosome
ENSOCUT00000016803	ENSOCUG00000016806	GLCCI1	10:30565879-30983897	6.08797	65.4303	-3.42592	5e-05	0.00164462	glucocorticoid induced 1 [Source:HGNC Symbol;Acc:HGNC:18713]	--	--	--	--
ENSOCUT00000006324	ENSOCUG00000006325	GALM	2:147662820-147720600	42.8287	8.44635	2.34218	5e-05	0.00164462	galactose mutarotase [Source:HGNC Symbol;Acc:HGNC:24063]	GO:0044421,GO:0005576,GO:0031982,GO:0031988,GO:0070062,GO:0043230,GO:0065010,GO:0005575,GO:0005488,GO:0030246,GO:0043226,GO:0008150,GO:0043227,GO:0019318,GO:0004034,GO:0016857,GO:0005996,GO:0006006,GO:0003674,GO:0016854,GO:0006012,GO:0016853,GO:0003824,GO:0005975,GO:0044723,GO:0044238,GO:0071704,GO:0008152	extracellular region part,extracellular region,vesicle,membrane-bounded vesicle,extracellular vesicular exosome,extracellular organelle,extracellular membrane-bounded organelle,cellular_component,binding,carbohydrate binding,organelle,biological_process,membrane-bounded organelle,hexose metabolic process,aldose 1-epimerase activity,racemase and epimerase activity, acting on carbohydrates and deri…	ocu00052,ocu00010,ocu01100	Galactose metabolism,Glycolysis / Gluconeogenesis,Metabolic pathways
ENSOCUT00000029930	ENSOCUG00000023896	E2F2	13:129694181-129720484	1.00178	15.6468	-3.96523	5e-05	0.00164462	E2F transcription factor 2 [Source:HGNC Symbol;Acc:HGNC:3114]	GO:0050896,GO:0044699,GO:0044763,GO:0005575,GO:0005515,GO:0051716,GO:0006915,GO:0012501,GO:0008219,GO:0016265,GO:0005488,GO:0007049,GO:0097285,GO:0065007,GO:0050794,GO:0035556,GO:0007165,GO:0051726,GO:0050789,GO:0003677,GO:0007154,GO:0044700,GO:0023052,GO:0043226,GO:0008150,GO:0043227,GO:0005623,GO:0044464,GO:0009987,GO:0097190,GO:0001047,GO:0080090,GO:0019222,GO:0003674,GO:0072331,GO:0031323,GO:…	response to stimulus,single-organism process,single-organism cellular process,cellular_component,protein binding,cellular response to stimulus,apoptotic process,programmed cell death,cell death,death,binding,cell cycle,cell-type specific apoptotic process,biological regulation,regulation of cellular process,intracellular signal transduction,signal transduction,regulation of cell cycle,regulation …	ocu04110,ocu05206,ocu05219,ocu05166,ocu05200,ocu05161,ocu05214,ocu05218,ocu05215,ocu05222,ocu05223,ocu05220,ocu05212	Cell cycle,MicroRNAs in cancer,Bladder cancer,HTLV-I infection,Pathways in cancer,Hepatitis B,Glioma,Melanoma,Prostate cancer,Small cell lung cancer,Non-small cell lung cancer,Chronic myeloid leukemia,Pancreatic cancer
ENSOCUT00000029934	ENSOCUG00000011500	TNC	GL018699:12560654-12655465	56.0253	8.92999	2.64935	5e-05	0.00164462	tenascin C [Source:HGNC Symbol;Acc:HGNC:5318]	GO:0044421,GO:0005576,GO:0050896,GO:0006950,GO:0048731,GO:0007275,GO:0048518,GO:0044699,GO:0009611,GO:0048513,GO:0005615,GO:0044767,GO:0048856,GO:0031012,GO:0044763,GO:0048522,GO:0032502,GO:0005575,GO:0008283,GO:0005515,GO:0005578,GO:0030154,GO:0042127,GO:0044707,GO:0022610,GO:0032501,GO:0051716,GO:0007155,GO:0048869,GO:0008284,GO:0044420,GO:0005488,GO:0016020,GO:0065007,GO:0050794,GO:0050789,GO:…	extracellular region part,extracellular region,response to stimulus,response to stress,system development,multicellular organismal development,positive regulation of biological process,single-organism process,response to wounding,organ development,extracellular space,single-organism developmental process,anatomical structure development,extracellular matrix,single-organism cellular process,positi…	ocu04512,ocu04151,ocu05206,ocu04510	ECM-receptor interaction,PI3K-Akt signaling pathway,MicroRNAs in cancer,Focal adhesion
ENSOCUT00000021839	ENSOCUG00000023225	CSF2RA	GL018887:543288-550528	123.867	10.8301	3.51567	5e-05	0.00164462	colony stimulating factor 2 receptor alpha subunit [Source:HGNC Symbol;Acc:HGNC:2435]	GO:0005575,GO:0005515,GO:0005488,GO:0004896,GO:0016020,GO:0016021,GO:0031224,GO:0044425,GO:0003674,GO:0004872,GO:0004871,GO:0060089,GO:0038023,GO:0004888	cellular_component,protein binding,binding,cytokine receptor activity,membrane,integral to membrane,intrinsic to membrane,membrane part,molecular_function,receptor activity,signal transducer activity,molecular transducer activity,signaling receptor activity,transmembrane signaling receptor activity	ocu04640,ocu04060,ocu04630,ocu05200	Hematopoietic cell lineage,Cytokine-cytokine receptor interaction,Jak-STAT signaling pathway,Pathways in cancer
ENSOCUT00000010099	ENSOCUG00000010101	IRF5	7:15645720-15652647	31.6844	4.95184	2.67774	5e-05	0.00164462	interferon regulatory factor 5 [Source:HGNC Symbol;Acc:HGNC:6120]	GO:0002376,GO:0006952,GO:0050896,GO:0070887,GO:0002237,GO:0010033,GO:0006950,GO:0009617,GO:0048518,GO:0044699,GO:0051707,GO:0034097,GO:0009607,GO:0044763,GO:0048522,GO:0005575,GO:0005515,GO:0042221,GO:0071310,GO:0071345,GO:1901700,GO:0051704,GO:0051716,GO:0043067,GO:0042981,GO:0002252,GO:0006915,GO:0012501,GO:0008219,GO:0016265,GO:0010941,GO:0005488,GO:0065007,GO:0050794,GO:0007165,GO:0050789,GO:…	immune system process,defense response,response to stimulus,cellular response to chemical stimulus,response to molecule of bacterial origin,response to organic substance,response to stress,response to bacterium,positive regulation of biological process,single-organism process,response to other organism,response to cytokine stimulus,response to biotic stimulus,single-organism cellular process,posi…	ocu04620	Toll-like receptor signaling pathway
ENSOCUT00000002221	ENSOCUG00000002220	P2RX4	21:6347042-6365264	27.8608	7.76556	1.84307	5e-05	0.00164462	purinergic receptor P2X 4 [Source:HGNC Symbol;Acc:HGNC:8535]	GO:0044421,GO:0005576,GO:0051239,GO:0050896,GO:0070887,GO:0010033,GO:0031982,GO:0031988,GO:0006950,GO:0048584,GO:0044459,GO:0070062,GO:0043230,GO:0065010,GO:0048518,GO:0044699,GO:0044763,GO:0048522,GO:0048583,GO:0005575,GO:0005515,GO:0042221,GO:0071310,GO:0048519,GO:0051179,GO:1901700,GO:0044707,GO:0032879,GO:0071944,GO:0032501,GO:0051716,GO:0023056,GO:0009967,GO:0010647,GO:0005886,GO:0006915,GO:…	extracellular region part,extracellular region,regulation of multicellular organismal process,response to stimulus,cellular response to chemical stimulus,response to organic substance,vesicle,membrane-bounded vesicle,response to stress,positive regulation of response to stimulus,plasma membrane part,extracellular vesicular exosome,extracellular organelle,extracellular membrane-bounded organelle,p…	ocu04020,ocu04080	Calcium signaling pathway,Neuroactive ligand-receptor interaction
ENSOCUT00000006194	ENSOCUG00000006194	KYNU	7:81158228-81346024	3.98315	0.405198	3.29721	5e-05	0.00164462	kynureninase [Source:HGNC Symbol;Acc:HGNC:6469]	GO:0002376,GO:0006955,GO:0006952,GO:0050896,GO:0010033,GO:0006950,GO:0046983,GO:0034097,GO:0045087,GO:0009605,GO:0005575,GO:0005515,GO:0042221,GO:0005488,GO:0009719,GO:0042803,GO:0034341,GO:0016787,GO:0042802,GO:0044283,GO:0044711,GO:0043226,GO:0006793,GO:0008150,GO:0043168,GO:0006796,GO:0043227,GO:0010243,GO:0032787,GO:0044106,GO:0019674,GO:0009308,GO:0005623,GO:0033273,GO:0044464,GO:0016053,GO:…	immune system process,immune response,defense response,response to stimulus,response to organic substance,response to stress,protein dimerization activity,response to cytokine stimulus,innate immune response,response to external stimulus,cellular_component,protein binding,response to chemical stimulus,binding,response to endogenous stimulus,protein homodimerization activity,response to interferon…	ocu00380,ocu01100	Tryptophan metabolism,Metabolic pathways
ENSOCUT00000015967	ENSOCUG00000015956	LRMP	8:14979232-15023321	3.06035	23.7479	-2.95603	5e-05	0.00164462	lymphoid restricted membrane protein [Source:HGNC Symbol;Acc:HGNC:6690]	GO:0005575,GO:0016020,GO:0016021,GO:0031224,GO:0044425	cellular_component,membrane,integral to membrane,intrinsic to membrane,membrane part	--	--
ENSOCUT00000013495	ENSOCUG00000013498	ADAMTS4	13:31782665-31794873	42.862	4.93542	3.11845	5e-05	0.00164462	ADAM metallopeptidase with thrombospondin type 1 motif 4 [Source:HGNC Symbol;Acc:HGNC:220]	GO:0044421,GO:0005576,GO:0005615,GO:0031012,GO:0005575,GO:0005515,GO:0005578,GO:0005488,GO:0016787,GO:0004175,GO:0008233,GO:0070011,GO:0008150,GO:0019899,GO:0008237,GO:0004222,GO:0002020,GO:0006508,GO:0043167,GO:0003674,GO:0019538,GO:0046872,GO:0003824,GO:0043169,GO:0046914,GO:0008270,GO:0044238,GO:0071704,GO:0043170,GO:0008152	extracellular region part,extracellular region,extracellular space,extracellular matrix,cellular_component,protein binding,proteinaceous extracellular matrix,binding,hydrolase activity,endopeptidase activity,peptidase activity,peptidase activity, acting on L-amino acid peptides,biological_process,enzyme binding,metallopeptidase activity,metalloendopeptidase activity,protease binding,proteolysis,i…	--	--
ENSOCUT00000009002	ENSOCUG00000008990	RLTPR	5:23207880-23220225	0.975056	16.7903	-4.106	5e-05	0.00164462	capping protein regulator and myosin 1 linker 2 [Source:HGNC Symbol;Acc:HGNC:27089]	GO:0050896,GO:0006950,GO:0048518,GO:0044699,GO:0009611,GO:0044767,GO:0048856,GO:0040017,GO:0044763,GO:0051272,GO:0016477,GO:0048522,GO:0030335,GO:0032502,GO:0005575,GO:2000147,GO:0005515,GO:0040011,GO:0048870,GO:0051674,GO:0048519,GO:0051179,GO:0040012,GO:0030334,GO:0006928,GO:2000145,GO:0032879,GO:0048523,GO:0071944,GO:0051270,GO:0005886,GO:0005488,GO:0016020,GO:0043228,GO:0043232,GO:0065007,GO:…	response to stimulus,response to stress,positive regulation of biological process,single-organism process,response to wounding,single-organism developmental process,anatomical structure development,positive regulation of locomotion,single-organism cellular process,positive regulation of cellular component movement,cell migration,positive regulation of cellular process,positive regulation of cell …	--	--
ENSOCUT00000022246	ENSOCUG00000026226	-	12:10838764-10839157	24.3666	198.691	-3.02755	5e-05	0.00164462	--	GO:0000786,GO:0032993,GO:0046982,GO:0046983,GO:0000785,GO:0044427,GO:0005694,GO:0005575,GO:0005515,GO:0005488,GO:0043228,GO:0043232,GO:0003677,GO:0043226,GO:0043227,GO:0005623,GO:0044464,GO:0003674,GO:0044424,GO:0044422,GO:0044446,GO:0005622,GO:0032991,GO:0043229,GO:0043231,GO:0005634,GO:1901363,GO:0097159,GO:0003676	nucleosome,protein-DNA complex,protein heterodimerization activity,protein dimerization activity,chromatin,chromosomal part,chromosome,cellular_component,protein binding,binding,non-membrane-bounded organelle,intracellular non-membrane-bounded organelle,DNA binding,organelle,membrane-bounded organelle,cell,cell part,molecular_function,intracellular part,organelle part,intracellular organelle part…	ocu05322,ocu05034	Systemic lupus erythematosus,Alcoholism
ENSOCUT00000002059	ENSOCUG00000002052	LRP4	1:186226059-186278260	21.7874	4.04951	2.42768	5e-05	0.00164462	LDL receptor related protein 4 [Source:HGNC Symbol;Acc:HGNC:6696]	GO:0009986,GO:0051239,GO:0050896,GO:0048731,GO:0007275,GO:0046983,GO:0048518,GO:0044699,GO:0048513,GO:0044767,GO:0048856,GO:0044763,GO:0048522,GO:0048583,GO:0032502,GO:2000026,GO:0005575,GO:0005515,GO:0048519,GO:0051179,GO:0030154,GO:0044707,GO:0048523,GO:0071944,GO:0032501,GO:0051716,GO:0050793,GO:0005886,GO:0048869,GO:0009966,GO:0018108,GO:0018212,GO:0006468,GO:0005102,GO:0023051,GO:0005509,GO:…	cell surface,regulation of multicellular organismal process,response to stimulus,system development,multicellular organismal development,protein dimerization activity,positive regulation of biological process,single-organism process,organ development,single-organism developmental process,anatomical structure development,single-organism cellular process,positive regulation of cellular process,regu…	--	--
ENSOCUT00000010934	ENSOCUG00000010935	CLEC4A	8:33544269-33562872	80.2914	4.75407	4.07801	5e-05	0.00164462	C-type lectin domain family 4 member A [Source:HGNC Symbol;Acc:HGNC:13257]	GO:0005575,GO:0016020,GO:0016021,GO:0031224,GO:0044425	cellular_component,membrane,integral to membrane,intrinsic to membrane,membrane part	--	--
ENSOCUT00000001824	ENSOCUG00000001824	TLR1	2:28215233-28217624	16.1545	2.48141	2.7027	5e-05	0.00164462	toll like receptor 1 [Source:HGNC Symbol;Acc:HGNC:11847]	GO:0002376,GO:0006955,GO:0045321,GO:0001775,GO:0002682,GO:0002684,GO:0001816,GO:0006952,GO:0001817,GO:0051239,GO:0046982,GO:0050896,GO:0002237,GO:0010033,GO:0006950,GO:0048584,GO:0009617,GO:0050778,GO:0044459,GO:0050776,GO:0046983,GO:0006954,GO:0048518,GO:0044699,GO:0009611,GO:0002764,GO:0051707,GO:0071219,GO:0009607,GO:0002757,GO:0044763,GO:0002253,GO:0048522,GO:0071216,GO:0045087,GO:0048583,GO:…	immune system process,immune response,leukocyte activation,cell activation,regulation of immune system process,positive regulation of immune system process,cytokine production,defense response,regulation of cytokine production,regulation of multicellular organismal process,protein heterodimerization activity,response to stimulus,response to molecule of bacterial origin,response to organic substan…	ocu05152,ocu04620	Tuberculosis,Toll-like receptor signaling pathway
ENSOCUT00000009700	ENSOCUG00000009701	CSF3	19:41228717-41230859	78.3755	0.587539	7.05957	5e-05	0.00164462	colony stimulating factor 3 [Source:HGNC Symbol;Acc:HGNC:2438]	GO:0002376,GO:0006955,GO:0002682,GO:0005576,GO:0002520,GO:0030097,GO:0048534,GO:0051239,GO:0050896,GO:0070887,GO:0010033,GO:0048584,GO:0048731,GO:0007275,GO:0048518,GO:0044699,GO:0048513,GO:0044767,GO:0034097,GO:0048856,GO:0044763,GO:0048522,GO:0048583,GO:0032502,GO:2000026,GO:0005575,GO:0005515,GO:0042221,GO:0071310,GO:0071345,GO:0051179,GO:0030154,GO:0044707,GO:0032879,GO:0051094,GO:0032501,GO:…	immune system process,immune response,regulation of immune system process,extracellular region,immune system development,hemopoiesis,hematopoietic or lymphoid organ development,regulation of multicellular organismal process,response to stimulus,cellular response to chemical stimulus,response to organic substance,positive regulation of response to stimulus,system development,multicellular organism…	ocu04640,ocu04060,ocu05144,ocu04151,ocu04630	Hematopoietic cell lineage,Cytokine-cytokine receptor interaction,Malaria,PI3K-Akt signaling pathway,Jak-STAT signaling pathway
ENSOCUT00000027926	ENSOCUG00000023521	AIF1	12:20429469-20433737	38.0161	5.72396	2.73153	5e-05	0.00164462	allograft inflammatory factor 1 [Source:HGNC Symbol;Acc:HGNC:352]	GO:0002376,GO:0006955,GO:0045321,GO:0001775,GO:0002682,GO:0002684,GO:0046649,GO:0050865,GO:0002694,GO:0042110,GO:0051249,GO:0006952,GO:0051251,GO:0050896,GO:0002696,GO:0070887,GO:0050867,GO:0010033,GO:0050870,GO:0050863,GO:0006950,GO:0048584,GO:0044459,GO:0006954,GO:0048518,GO:0044699,GO:0046651,GO:0009611,GO:0032943,GO:0070661,GO:0060326,GO:0034097,GO:0040017,GO:0044763,GO:0051272,GO:0016477,GO:…	immune system process,immune response,leukocyte activation,cell activation,regulation of immune system process,positive regulation of immune system process,lymphocyte activation,regulation of cell activation,regulation of leukocyte activation,T cell activation,regulation of lymphocyte activation,defense response,positive regulation of lymphocyte activation,response to stimulus,positive regulation…	--	--
ENSOCUT00000025433	ENSOCUG00000022557	-	17:42145129-42145594	0	20.8765	#NAME?	5e-05	0.00164462	--	--	--	--	--
ENSOCUT00000025439	ENSOCUG00000021388	P2RX1	19:14613184-14629169	1.45168	12.5512	-3.11203	5e-05	0.00164462	purinergic receptor P2X 1 [Source:HGNC Symbol;Acc:HGNC:8533]	GO:0001775,GO:0006952,GO:0051239,GO:0050896,GO:0010033,GO:0006950,GO:0044459,GO:0006954,GO:0048518,GO:0044699,GO:0009611,GO:0044763,GO:0005575,GO:0042221,GO:0051179,GO:1901700,GO:0032940,GO:0044707,GO:0051704,GO:0032879,GO:0071944,GO:0032501,GO:0005886,GO:0043067,GO:0042981,GO:0006915,GO:0046903,GO:0012501,GO:0008219,GO:0016265,GO:0010941,GO:0005488,GO:0051049,GO:0051050,GO:0016020,GO:0065007,GO:…	cell activation,defense response,regulation of multicellular organismal process,response to stimulus,response to organic substance,response to stress,plasma membrane part,inflammatory response,positive regulation of biological process,single-organism process,response to wounding,single-organism cellular process,cellular_component,response to chemical stimulus,localization,response to oxygen-conta…	ocu04611,ocu04020,ocu04080	Platelet activation,Calcium signaling pathway,Neuroactive ligand-receptor interaction
ENSOCUT00000007889	ENSOCUG00000007896	MILR1	19:49297509-49311971	12.8519	2.01273	2.67475	5e-05	0.00164462	mast cell immunoglobulin like receptor 1 [Source:HGNC Symbol;Acc:HGNC:27570]	GO:0002376,GO:0006955,GO:0045321,GO:0001775,GO:0002682,GO:0050865,GO:0002694,GO:0050896,GO:0044699,GO:0044763,GO:0005575,GO:0005515,GO:0048519,GO:0051179,GO:0032940,GO:0048523,GO:0002252,GO:0046903,GO:0050866,GO:0002683,GO:0002695,GO:0005488,GO:0002366,GO:0002443,GO:0002263,GO:0002274,GO:0016020,GO:0065007,GO:0016021,GO:0044765,GO:0031224,GO:0050794,GO:0050789,GO:0044425,GO:0051234,GO:0006810,GO:…	immune system process,immune response,leukocyte activation,cell activation,regulation of immune system process,regulation of cell activation,regulation of leukocyte activation,response to stimulus,single-organism process,single-organism cellular process,cellular_component,protein binding,negative regulation of biological process,localization,secretion by cell,negative regulation of cellular proce…	--	--
ENSOCUT00000010307	ENSOCUG00000010306	ENTPD3	9:3500693-3541821	2.02626	16.9525	-3.06461	5e-05	0.00164462	ectonucleoside triphosphate diphosphohydrolase 3 [Source:HGNC Symbol;Acc:HGNC:3365]	GO:0005575,GO:0005515,GO:0071944,GO:0005886,GO:0005488,GO:0016020,GO:0016021,GO:0031224,GO:0044425,GO:0016787,GO:0006793,GO:0008150,GO:0006796,GO:0005623,GO:0044464,GO:0044710,GO:0009987,GO:0017111,GO:0016462,GO:0016818,GO:0003674,GO:0016817,GO:1901575,GO:0044281,GO:0009056,GO:0009134,GO:0009132,GO:0017110,GO:0046434,GO:0003824,GO:1901292,GO:1901361,GO:0055086,GO:0006753,GO:0044270,GO:0046700,GO:…	cellular_component,protein binding,cell periphery,plasma membrane,binding,membrane,integral to membrane,intrinsic to membrane,membrane part,hydrolase activity,phosphorus metabolic process,biological_process,phosphate-containing compound metabolic process,cell,cell part,single-organism metabolic process,cellular process,nucleoside-triphosphatase activity,pyrophosphatase activity,hydrolase activity…	ocu05169,ocu00230,ocu00240	Epstein-Barr virus infection,Purine metabolism,Pyrimidine metabolism
ENSOCUT00000007411	ENSOCUG00000027227	HIST1H2BB	12:11013102-11013483	29.136	573.025	-4.29772	5e-05	0.00164462	histone cluster 1, H2bb [Source:HGNC Symbol;Acc:HGNC:4751]	GO:0000786,GO:0032993,GO:0046982,GO:0046983,GO:0000785,GO:0044427,GO:0005694,GO:0005575,GO:0005515,GO:0005488,GO:0043228,GO:0043232,GO:0003677,GO:0000228,GO:0043226,GO:0044454,GO:0043227,GO:0005623,GO:0044464,GO:0005737,GO:0003674,GO:0044424,GO:0000784,GO:0044422,GO:0044446,GO:0005622,GO:0032991,GO:0043229,GO:0000781,GO:0043231,GO:0005634,GO:1901363,GO:0097159,GO:0031981,GO:0031974,GO:0070013,GO:…	nucleosome,protein-DNA complex,protein heterodimerization activity,protein dimerization activity,chromatin,chromosomal part,chromosome,cellular_component,protein binding,binding,non-membrane-bounded organelle,intracellular non-membrane-bounded organelle,DNA binding,nuclear chromosome,organelle,nuclear chromosome part,membrane-bounded organelle,cell,cell part,cytoplasm,molecular_function,intracell…	ocu05322,ocu05034,ocu05203	Systemic lupus erythematosus,Alcoholism,Viral carcinogenesis
ENSOCUT00000001717	ENSOCUG00000001717	SKAP1	19:38917125-39223168	0.874853	26.7153	-4.93248	5e-05	0.00164462	src kinase associated phosphoprotein 1 [Source:HGNC Symbol;Acc:HGNC:15605]	GO:0002376,GO:0006955,GO:0002682,GO:0002684,GO:0050896,GO:0048584,GO:0050778,GO:0044459,GO:0050776,GO:0048518,GO:0044699,GO:0002764,GO:0002757,GO:0044763,GO:0002253,GO:0048522,GO:0048583,GO:0005575,GO:0005515,GO:0051179,GO:0002768,GO:0071944,GO:0050851,GO:0002429,GO:0022610,GO:0051716,GO:0005886,GO:0007155,GO:0050852,GO:0005488,GO:0016020,GO:0065007,GO:0030155,GO:0050794,GO:0007165,GO:0050789,GO:…	immune system process,immune response,regulation of immune system process,positive regulation of immune system process,response to stimulus,positive regulation of response to stimulus,positive regulation of immune response,plasma membrane part,regulation of immune response,positive regulation of biological process,single-organism process,immune response-regulating signaling pathway,immune respons…	ocu04015	Rap1 signaling pathway
ENSOCUT00000009541	ENSOCUG00000009532	AFF3	2:92100139-92657587	1.19777	19.244	-4.00599	5e-05	0.00164462	AF4/FMR2 family member 3 [Source:HGNC Symbol;Acc:HGNC:6473]	GO:0050896,GO:0010033,GO:0007275,GO:0044699,GO:0044767,GO:0034097,GO:0048856,GO:0032502,GO:0005575,GO:0042221,GO:0044707,GO:0032501,GO:0005488,GO:0034612,GO:0009653,GO:0003677,GO:0043226,GO:0008150,GO:0043227,GO:0005623,GO:0044464,GO:0005737,GO:0003674,GO:0009790,GO:0044424,GO:0044422,GO:0044446,GO:0005622,GO:0043229,GO:0048598,GO:0003690,GO:0043566,GO:0043231,GO:0030326,GO:0035113,GO:0005634,GO:…	response to stimulus,response to organic substance,multicellular organismal development,single-organism process,single-organism developmental process,response to cytokine stimulus,anatomical structure development,developmental process,cellular_component,response to chemical stimulus,single-multicellular organism process,multicellular organismal process,binding,response to tumor necrosis factor,an…	--	--
ENSOCUT00000017100	ENSOCUG00000017093	TEX15	2:76844265-76910006	0.404575	11.2263	-4.79433	5e-05	0.00164462	testis expressed 15 [Source:HGNC Symbol;Acc:HGNC:11738]	GO:0050896,GO:0006950,GO:0048731,GO:0007275,GO:0044699,GO:0048513,GO:0044767,GO:0048856,GO:0044763,GO:0048583,GO:0032502,GO:0051179,GO:0044707,GO:0032879,GO:0032501,GO:0051716,GO:0032880,GO:0022402,GO:0007049,GO:0080134,GO:0065007,GO:0050794,GO:0050789,GO:0048872,GO:0033036,GO:0006259,GO:0051641,GO:0016043,GO:0065008,GO:0007126,GO:0071840,GO:0008104,GO:0006310,GO:0034502,GO:0008150,GO:0051321,GO:…	response to stimulus,response to stress,system development,multicellular organismal development,single-organism process,organ development,single-organism developmental process,anatomical structure development,single-organism cellular process,regulation of response to stimulus,developmental process,localization,single-multicellular organism process,regulation of localization,multicellular organism…	--	--
ENSOCUT00000025087	ENSOCUG00000027997	-	21:15143436-15188208	2.67307	13.3236	-2.31741	5e-05	0.00164462	tescalcin [Source:HGNC Symbol;Acc:HGNC:26065]	GO:0002376,GO:0002682,GO:0002521,GO:0002520,GO:0030097,GO:0048534,GO:0051239,GO:0050896,GO:0070887,GO:0010033,GO:0048731,GO:0007275,GO:0046983,GO:0048518,GO:0044699,GO:0048513,GO:0044767,GO:0048856,GO:0044763,GO:0048522,GO:0032502,GO:2000026,GO:0005575,GO:0008283,GO:0005515,GO:0042221,GO:0071310,GO:0048519,GO:0051179,GO:1902105,GO:1901700,GO:0030154,GO:1902107,GO:0042127,GO:0044707,GO:0032879,GO:…	immune system process,regulation of immune system process,leukocyte differentiation,immune system development,hemopoiesis,hematopoietic or lymphoid organ development,regulation of multicellular organismal process,response to stimulus,cellular response to chemical stimulus,response to organic substance,system development,multicellular organismal development,protein dimerization activity,positive r…	--	--
ENSOCUT00000031843	ENSOCUG00000021747	WDR78	13:99337542-99424779	0.986242	14.1379	-3.84149	5e-05	0.00164462	WD repeat domain 78 [Source:HGNC Symbol;Acc:HGNC:26252]	GO:0002376,GO:0002520,GO:0030097,GO:0048534,GO:0048731,GO:0007275,GO:0044699,GO:0048513,GO:0044767,GO:0048856,GO:0044763,GO:0032502,GO:0030154,GO:0044707,GO:0032501,GO:0048869,GO:0008150,GO:0009987,GO:0002244	immune system process,immune system development,hemopoiesis,hematopoietic or lymphoid organ development,system development,multicellular organismal development,single-organism process,organ development,single-organism developmental process,anatomical structure development,single-organism cellular process,developmental process,cell differentiation,single-multicellular organism process,multicellula…	--	--
ENSOCUT00000023601	ENSOCUG00000027471	IL6	10:7771595-7776461	310.314	6.23971	5.63611	5e-05	0.00164462	Interleukin-6 [Source:UniProtKB/Swiss-Prot;Acc:Q9MZR1]	GO:0002376,GO:0006955,GO:0045321,GO:0001775,GO:0044421,GO:0005576,GO:0046649,GO:0002521,GO:0002520,GO:0042110,GO:0030097,GO:0048534,GO:0006952,GO:0030098,GO:0050896,GO:0006950,GO:0048731,GO:0007275,GO:0030217,GO:0006954,GO:0044699,GO:0009611,GO:0048513,GO:0005615,GO:0044767,GO:0048856,GO:0044763,GO:0032502,GO:0005575,GO:0005515,GO:0030154,GO:0044707,GO:0032501,GO:0048869,GO:0002252,GO:0046631,GO:…	immune system process,immune response,leukocyte activation,cell activation,extracellular region part,extracellular region,lymphocyte activation,leukocyte differentiation,immune system development,T cell activation,hemopoiesis,hematopoietic or lymphoid organ development,defense response,lymphocyte differentiation,response to stimulus,response to stress,system development,multicellular organismal d…	ocu04640,ocu05323,ocu04060,ocu05146,ocu05152,ocu04672,ocu05144,ocu04151,ocu05202,ocu04620,ocu05162,ocu05143,ocu05142,ocu05332,ocu05321,ocu05133,ocu05166,ocu05134,ocu04066,ocu05132,ocu05164,ocu04630,ocu05200,ocu05410,ocu05161,ocu04668,ocu05020,ocu04068,ocu04621,ocu05168,ocu04623,ocu04932	Hematopoietic cell lineage,Rheumatoid arthritis,Cytokine-cytokine receptor interaction,Amoebiasis,Tuberculosis,Intestinal immune network for IgA production,Malaria,PI3K-Akt signaling pathway,Transcriptional misregulation in cancer,Toll-like receptor signaling pathway,Measles,African trypanosomiasis,Chagas disease (American trypanosomiasis),Graft-versus-host disease,Inflammatory bowel disease (IBD…
ENSOCUT00000005291	ENSOCUG00000005294	RRAGD	12:76196984-76243516	33.9039	10.1929	1.73389	5e-05	0.00164462	Ras related GTP binding D [Source:HGNC Symbol;Acc:HGNC:19903]	GO:0046982,GO:0046983,GO:0005575,GO:0005515,GO:0005764,GO:0000323,GO:0005488,GO:0005773,GO:0043226,GO:0043168,GO:0043227,GO:0005623,GO:0044464,GO:0035639,GO:0032555,GO:0005737,GO:0032550,GO:0001883,GO:0017076,GO:0032549,GO:0001882,GO:0032553,GO:0043167,GO:0003674,GO:0044424,GO:0005622,GO:0036094,GO:0043229,GO:0043231,GO:0005634,GO:0000166,GO:1901265,GO:0044444,GO:1901363,GO:0097159,GO:0032561,GO:…	protein heterodimerization activity,protein dimerization activity,cellular_component,protein binding,lysosome,lytic vacuole,binding,vacuole,organelle,anion binding,membrane-bounded organelle,cell,cell part,purine ribonucleoside triphosphate binding,purine ribonucleotide binding,cytoplasm,purine ribonucleoside binding,purine nucleoside binding,purine nucleotide binding,ribonucleoside binding,nucle…	ocu04150	mTOR signaling pathway
ENSOCUT00000006249	ENSOCUG00000006243	WDFY4	GL018819:594008-860542	14.1727	3.9163	1.85555	5e-05	0.00164462	WDFY family member 4 [Source:HGNC Symbol;Acc:HGNC:29323]	--	--	--	--
ENSOCUT00000025295	ENSOCUG00000021092	-	GL018758:1281411-1281887	0	19.9417	#NAME?	5e-05	0.00164462	--	--	--	--	--
ENSOCUT00000027637	ENSOCUG00000027315	-	13:42169408-42169816	87.25	749.101	-3.10193	5e-05	0.00164462	histone cluster 2, H3a [Source:HGNC Symbol;Acc:HGNC:20505]	GO:0000786,GO:0032993,GO:0044421,GO:0005576,GO:0046982,GO:0031982,GO:0031988,GO:0046983,GO:0070062,GO:0043230,GO:0065010,GO:0044699,GO:0000785,GO:0044427,GO:0044763,GO:0005694,GO:0005575,GO:0005515,GO:0048519,GO:0048523,GO:0005488,GO:0043228,GO:0043232,GO:0065007,GO:0050794,GO:0050789,GO:0003677,GO:0006323,GO:0071103,GO:0006259,GO:0016043,GO:0071840,GO:0006333,GO:0031497,GO:0006334,GO:0043226,GO:…	nucleosome,protein-DNA complex,extracellular region part,extracellular region,protein heterodimerization activity,vesicle,membrane-bounded vesicle,protein dimerization activity,extracellular vesicular exosome,extracellular organelle,extracellular membrane-bounded organelle,single-organism process,chromatin,chromosomal part,single-organism cellular process,chromosome,cellular_component,protein bin…	ocu05322,ocu05034,ocu05202	Systemic lupus erythematosus,Alcoholism,Transcriptional misregulation in cancer
ENSOCUT00000016716	ENSOCUG00000016712	DNER	7:171291910-171704718	1.07279	11.0574	-3.36558	5e-05	0.00164462	delta/notch like EGF repeat containing [Source:HGNC Symbol;Acc:HGNC:24456]	GO:0048731,GO:0007275,GO:0044699,GO:0048513,GO:0044767,GO:0048856,GO:0044763,GO:0032502,GO:0005575,GO:0005515,GO:0030154,GO:0044707,GO:0071944,GO:0032501,GO:0005886,GO:0048869,GO:0005102,GO:0005509,GO:0005488,GO:0016020,GO:0016021,GO:0031224,GO:0044425,GO:0009888,GO:0043226,GO:0008150,GO:0043227,GO:0005623,GO:0044464,GO:0043005,GO:0005737,GO:0005768,GO:0009987,GO:0048468,GO:0022008,GO:0048741,GO:…	system development,multicellular organismal development,single-organism process,organ development,single-organism developmental process,anatomical structure development,single-organism cellular process,developmental process,cellular_component,protein binding,cell differentiation,single-multicellular organism process,cell periphery,multicellular organismal process,plasma membrane,cellular developm…	--	--
ENSOCUT00000000061	ENSOCUG00000000061	FBXO5	12:143098858-143108925	2.83879	16.8927	-2.57305	5e-05	0.00164462	F-box protein 5 [Source:HGNC Symbol;Acc:HGNC:13584]	GO:0044699,GO:0044767,GO:0048856,GO:0044763,GO:0032502,GO:0005575,GO:0005515,GO:0048519,GO:0030154,GO:0048523,GO:0032501,GO:0048869,GO:0000278,GO:0005488,GO:0022402,GO:0007049,GO:0007346,GO:0043228,GO:0043232,GO:0065007,GO:0050794,GO:0005856,GO:0051726,GO:0050789,GO:0065009,GO:0044430,GO:0031399,GO:0051246,GO:0010948,GO:0007056,GO:0000212,GO:0090306,GO:0010564,GO:0019900,GO:0032268,GO:0019901,GO:…	single-organism process,single-organism developmental process,anatomical structure development,single-organism cellular process,developmental process,cellular_component,protein binding,negative regulation of biological process,cell differentiation,negative regulation of cellular process,multicellular organismal process,cellular developmental process,mitotic cell cycle,binding,cell cycle process,c…	ocu04114	Oocyte meiosis
ENSOCUT00000010382	ENSOCUG00000010383	CD68	19:11598640-11600423	111.547	8.41836	3.72796	5e-05	0.00164462	CD68 molecule [Source:HGNC Symbol;Acc:HGNC:1693]	GO:0050896,GO:0070887,GO:0010033,GO:0044699,GO:0044763,GO:0005575,GO:0042221,GO:0071310,GO:0051716,GO:0016020,GO:0016021,GO:0031224,GO:0044425,GO:0008150,GO:0009987	response to stimulus,cellular response to chemical stimulus,response to organic substance,single-organism process,single-organism cellular process,cellular_component,response to chemical stimulus,cellular response to organic substance,cellular response to stimulus,membrane,integral to membrane,intrinsic to membrane,membrane part,biological_process,cellular process	ocu04142	Lysosome
ENSOCUT00000006547	ENSOCUG00000006540	PLCB2	17:31709311-31727742	8.97089	2.05119	2.12879	5e-05	0.00164462	phospholipase C beta 2 [Source:HGNC Symbol;Acc:HGNC:9055]	GO:0050896,GO:0044699,GO:0044763,GO:0005575,GO:0044707,GO:0032501,GO:0051716,GO:0005509,GO:0005488,GO:0065007,GO:0050794,GO:0035556,GO:0007165,GO:0050789,GO:0007154,GO:0044700,GO:0023052,GO:0016042,GO:0016787,GO:0006629,GO:0008150,GO:0004435,GO:0004629,GO:0005623,GO:0044464,GO:0005737,GO:0044710,GO:0009987,GO:0016298,GO:0004620,GO:0043167,GO:0003674,GO:1901575,GO:0008081,GO:0044424,GO:0050913,GO:…	response to stimulus,single-organism process,single-organism cellular process,cellular_component,single-multicellular organism process,multicellular organismal process,cellular response to stimulus,calcium ion binding,binding,biological regulation,regulation of cellular process,intracellular signal transduction,signal transduction,regulation of biological process,cell communication,single organis…	ocu05146,ocu05143,ocu05142,ocu04062,ocu04750,ocu04015,ocu04730,ocu04540,ocu04611,ocu05200,ocu04970,ocu04713,ocu04020,ocu04720,ocu04912,ocu04070,ocu04921,ocu04918,ocu04915,ocu04728,ocu04916,ocu04961,ocu04071,ocu04723,ocu04310,ocu04971,ocu00562,ocu04919,ocu04724,ocu04270,ocu04911,ocu04725,ocu04022,ocu04726,ocu04261,ocu04972,ocu05010,ocu05016,ocu01100	Amoebiasis,African trypanosomiasis,Chagas disease (American trypanosomiasis),Chemokine signaling pathway,Inflammatory mediator regulation of TRP channels,Rap1 signaling pathway,Long-term depression,Gap junction,Platelet activation,Pathways in cancer,Salivary secretion,Circadian entrainment,Calcium signaling pathway,Long-term potentiation,GnRH signaling pathway,Phosphatidylinositol signaling syste…
ENSOCUT00000004431	ENSOCUG00000004430	-	12:11758745-11962470	0.489618	17.3148	-5.14421	5e-05	0.00164462	--	GO:0005575,GO:0005488,GO:0006793,GO:0008150,GO:0006796,GO:0005623,GO:0044464,GO:0005737,GO:0044710,GO:0009987,GO:0030338,GO:0046381,GO:0043167,GO:0003674,GO:0044424,GO:0016716,GO:0044281,GO:1901135,GO:0005622,GO:0046872,GO:0003824,GO:0043169,GO:0055086,GO:0006753,GO:0016705,GO:0009117,GO:0055114,GO:0051537,GO:0009225,GO:0051536,GO:0051540,GO:0044238,GO:0071704,GO:0019637,GO:0006807,GO:0016491,GO:…	cellular_component,binding,phosphorus metabolic process,biological_process,phosphate-containing compound metabolic process,cell,cell part,cytoplasm,single-organism metabolic process,cellular process,CMP-N-acetylneuraminate monooxygenase activity,CMP-N-acetylneuraminate metabolic process,ion binding,molecular_function,intracellular part,oxidoreductase activity, acting on paired donors, with incorp…	ocu00520	Amino sugar and nucleotide sugar metabolism
ENSOCUT00000011082	ENSOCUG00000011085	CTSS	13:41369833-41394028	376.437	42.3958	3.15042	5e-05	0.00164462	cathepsin S [Source:HGNC Symbol;Acc:HGNC:2545]	GO:0002376,GO:0006955,GO:0044421,GO:0005576,GO:0050896,GO:0070887,GO:0010033,GO:0048518,GO:0044699,GO:0005615,GO:0044763,GO:0005575,GO:0005515,GO:0042221,GO:0071310,GO:0051179,GO:0044707,GO:0032879,GO:0032501,GO:0051716,GO:0005764,GO:0000323,GO:0002250,GO:0005488,GO:0051049,GO:0051050,GO:0005773,GO:0065007,GO:0044093,GO:0044765,GO:0050794,GO:0050789,GO:0019882,GO:0051234,GO:0065009,GO:0009719,GO:…	immune system process,immune response,extracellular region part,extracellular region,response to stimulus,cellular response to chemical stimulus,response to organic substance,positive regulation of biological process,single-organism process,extracellular space,single-organism cellular process,cellular_component,protein binding,response to chemical stimulus,cellular response to organic substance,l…	ocu04142,ocu05152,ocu04145,ocu04612	Lysosome,Tuberculosis,Phagosome,Antigen processing and presentation
ENSOCUT00000004027	ENSOCUG00000004027	TRAF3IP3	16:62890878-62911114	5.22346	62.2027	-3.5739	5e-05	0.00164462	TRAF3 interacting protein 3 [Source:HGNC Symbol;Acc:HGNC:30766]	GO:0005575,GO:0005515,GO:0005488,GO:0016020,GO:0016021,GO:0031224,GO:0044425,GO:0003674	cellular_component,protein binding,binding,membrane,integral to membrane,intrinsic to membrane,membrane part,molecular_function	--	--
ENSOCUT00000012518	ENSOCUG00000012518	DSC2	9:72326346-72367178	1.99624	13.3405	-2.74045	5e-05	0.00164462	desmocollin 2 [Source:HGNC Symbol;Acc:HGNC:3036]	GO:0044421,GO:0005576,GO:0051239,GO:0050896,GO:0031982,GO:0031988,GO:0006950,GO:0070062,GO:0043230,GO:0065010,GO:0044699,GO:0044763,GO:0009605,GO:0005575,GO:0005515,GO:0044707,GO:0071944,GO:0022610,GO:0032501,GO:0051716,GO:0005886,GO:0007155,GO:0005509,GO:0005488,GO:0016020,GO:0065007,GO:0016337,GO:0016021,GO:0031224,GO:0050789,GO:0044425,GO:0031410,GO:0007154,GO:0044700,GO:0023052,GO:0030054,GO:…	extracellular region part,extracellular region,regulation of multicellular organismal process,response to stimulus,vesicle,membrane-bounded vesicle,response to stress,extracellular vesicular exosome,extracellular organelle,extracellular membrane-bounded organelle,single-organism process,single-organism cellular process,response to external stimulus,cellular_component,protein binding,single-multic…	ocu05412	Arrhythmogenic right ventricular cardiomyopathy (ARVC)
ENSOCUT00000000183	ENSOCUG00000027285	-	GL018981:55283-90740	20.0588	1.16036	4.1116	5e-05	0.00164462	--	GO:0005575,GO:0016020,GO:0016021,GO:0031224,GO:0044425	cellular_component,membrane,integral to membrane,intrinsic to membrane,membrane part	ocu04380	Osteoclast differentiation
ENSOCUT00000008545	ENSOCUG00000008545	RRM2B	3:117727925-117762915	12.7679	97.4012	-2.93142	5e-05	0.00164462	ribonucleotide reductase regulatory TP53 inducible subunit M2B [Source:HGNC Symbol;Acc:HGNC:17296]	GO:0044421,GO:0005576,GO:0050896,GO:0031982,GO:0031988,GO:0006950,GO:0048731,GO:0007275,GO:0070062,GO:0043230,GO:0065010,GO:0044699,GO:0048513,GO:0044767,GO:0048856,GO:0044763,GO:0048583,GO:0032502,GO:0005575,GO:0005515,GO:0048519,GO:0044707,GO:0048523,GO:0032501,GO:0051716,GO:0043067,GO:0042981,GO:0006915,GO:0009966,GO:0012501,GO:0008219,GO:0016265,GO:0010941,GO:0023051,GO:0005488,GO:0010646,GO:…	extracellular region part,extracellular region,response to stimulus,vesicle,membrane-bounded vesicle,response to stress,system development,multicellular organismal development,extracellular vesicular exosome,extracellular organelle,extracellular membrane-bounded organelle,single-organism process,organ development,single-organism developmental process,anatomical structure development,single-organi…	ocu04115,ocu00480,ocu00230,ocu00240,ocu01100	p53 signaling pathway,Glutathione metabolism,Purine metabolism,Pyrimidine metabolism,Metabolic pathways
ENSOCUT00000021182	ENSOCUG00000026717	-	12:11031561-11031972	24.2381	422.095	-4.12222	5e-05	0.00164462	--	GO:0000786,GO:0032993,GO:0046982,GO:0046983,GO:0000785,GO:0044427,GO:0005694,GO:0005575,GO:0005515,GO:0005488,GO:0043228,GO:0043232,GO:0003677,GO:0043226,GO:0043227,GO:0005623,GO:0044464,GO:0003674,GO:0044424,GO:0044422,GO:0044446,GO:0005622,GO:0032991,GO:0043229,GO:0043231,GO:0005634,GO:1901363,GO:0097159,GO:0003676	nucleosome,protein-DNA complex,protein heterodimerization activity,protein dimerization activity,chromatin,chromosomal part,chromosome,cellular_component,protein binding,binding,non-membrane-bounded organelle,intracellular non-membrane-bounded organelle,DNA binding,organelle,membrane-bounded organelle,cell,cell part,molecular_function,intracellular part,organelle part,intracellular organelle part…	ocu05322,ocu05034,ocu05202	Systemic lupus erythematosus,Alcoholism,Transcriptional misregulation in cancer
ENSOCUT00000004660	ENSOCUG00000004662	TCTEX1D1	13:99465839-99491940	0	2.1567	#NAME?	5e-05	0.00164462	Tctex1 domain containing 1 [Source:HGNC Symbol;Acc:HGNC:26882]	GO:0005515,GO:0005488,GO:0003674	protein binding,binding,molecular_function	--	--
ENSOCUT00000014794	ENSOCUG00000014801	-	18:48425104-48437117	211.776	59.2152	1.8385	5e-05	0.00164462	--	GO:0005575,GO:0016020,GO:0016021,GO:0031224,GO:0044425,GO:0006629,GO:0044283,GO:0008610,GO:0044711,GO:0016717,GO:0008150,GO:0032787,GO:0044255,GO:0006631,GO:0016053,GO:0046394,GO:0072330,GO:0044710,GO:0009987,GO:0006633,GO:0003674,GO:0044281,GO:0019752,GO:0043436,GO:0006082,GO:0003824,GO:0016705,GO:0055114,GO:0044238,GO:0071704,GO:0016491,GO:0008152,GO:1901576,GO:0044249,GO:0009058,GO:0044237	cellular_component,membrane,integral to membrane,intrinsic to membrane,membrane part,lipid metabolic process,small molecule biosynthetic process,lipid biosynthetic process,single-organism biosynthetic process,oxidoreductase activity, acting on paired donors, with oxidation of a pair of donors resulting in the reduction of molecular oxygen to two molecules of water,biological_process,monocarboxyli…	ocu03320,ocu01040,ocu01212,ocu04152	PPAR signaling pathway,Biosynthesis of unsaturated fatty acids,Fatty acid metabolism,AMPK signaling pathway
ENSOCUT00000015687	ENSOCUG00000015685	SSX2IP	13:80254316-80279016	9.90706	47.7965	-2.27038	5e-05	0.00164462	SSX family member 2 interacting protein [Source:HGNC Symbol;Acc:HGNC:16509]	GO:0050896,GO:0044699,GO:0044767,GO:0048856,GO:0044763,GO:0048583,GO:0032502,GO:0005575,GO:0005515,GO:0040011,GO:0048870,GO:0051674,GO:0051179,GO:0040012,GO:0006928,GO:2000145,GO:0032879,GO:0051270,GO:0051716,GO:0048869,GO:0009966,GO:0023051,GO:0005488,GO:0010646,GO:0043228,GO:0043232,GO:0065007,GO:0044765,GO:0050794,GO:0005856,GO:0035556,GO:0007165,GO:0050789,GO:0051234,GO:0044430,GO:0009653,GO:…	response to stimulus,single-organism process,single-organism developmental process,anatomical structure development,single-organism cellular process,regulation of response to stimulus,developmental process,cellular_component,protein binding,locomotion,cell motility,localization of cell,localization,regulation of locomotion,cellular component movement,regulation of cell motility,regulation of loca…	ocu04520	Adherens junction
ENSOCUT00000013561	ENSOCUG00000013564	TRIM63	13:139223047-139240154	2.04921	12.2687	-2.58184	5e-05	0.00164462	tripartite motif containing 63 [Source:HGNC Symbol;Acc:HGNC:16007]	GO:0005575,GO:0005515,GO:0005488,GO:0005623,GO:0044464,GO:0005737,GO:0008092,GO:0043167,GO:0003674,GO:0044424,GO:0005622,GO:0046872,GO:0031432,GO:0043169,GO:0046914,GO:0008270	cellular_component,protein binding,binding,cell,cell part,cytoplasm,cytoskeletal protein binding,ion binding,molecular_function,intracellular part,intracellular,metal ion binding,titin binding,cation binding,transition metal ion binding,zinc ion binding	--	--
ENSOCUT00000013566	ENSOCUG00000013567	GRN	19:44627273-44635805	334.88	64.279	2.38122	5e-05	0.00164462	granulin [Source:HGNC Symbol;Acc:HGNC:4601]	GO:0044421,GO:0005576,GO:0031982,GO:0031988,GO:0070062,GO:0043230,GO:0065010,GO:0005575,GO:0005515,GO:0005488,GO:0043226,GO:0043227,GO:0005623,GO:0044464,GO:0003674,GO:0044424,GO:0005622,GO:0043229,GO:0043231	extracellular region part,extracellular region,vesicle,membrane-bounded vesicle,extracellular vesicular exosome,extracellular organelle,extracellular membrane-bounded organelle,cellular_component,protein binding,binding,organelle,membrane-bounded organelle,cell,cell part,molecular_function,intracellular part,intracellular,intracellular organelle,intracellular membrane-bounded organelle	--	--
ENSOCUT00000000579	ENSOCUG00000000579	TMEM156	2:28353940-28391980	0.976865	38.3514	-5.29498	5e-05	0.00164462	transmembrane protein 156 [Source:HGNC Symbol;Acc:HGNC:26260]	GO:0005575,GO:0016020,GO:0016021,GO:0031224,GO:0044425	cellular_component,membrane,integral to membrane,intrinsic to membrane,membrane part	--	--
ENSOCUT00000024111	ENSOCUG00000025840	RENBP	GL018816:506781-511889	46.8048	12.9943	1.84877	5e-05	0.00164462	renin binding protein [Source:HGNC Symbol;Acc:HGNC:9959]	GO:0044421,GO:0005576,GO:0031982,GO:0031988,GO:0070062,GO:0043230,GO:0065010,GO:0005575,GO:1901071,GO:0043226,GO:0008150,GO:0043227,GO:0006040,GO:0050121,GO:0016857,GO:0006044,GO:0003674,GO:0016854,GO:1901135,GO:0016853,GO:0003824,GO:0071704,GO:0008152	extracellular region part,extracellular region,vesicle,membrane-bounded vesicle,extracellular vesicular exosome,extracellular organelle,extracellular membrane-bounded organelle,cellular_component,glucosamine-containing compound metabolic process,organelle,biological_process,membrane-bounded organelle,amino sugar metabolic process,N-acylglucosamine 2-epimerase activity,racemase and epimerase activ…	ocu00520	Amino sugar and nucleotide sugar metabolism
ENSOCUT00000025640	ENSOCUG00000025150	-	GL018758:1294943-1295436	0	6.1535	#NAME?	5e-05	0.00164462	--	--	--	--	--
ENSOCUT00000017019	ENSOCUG00000017019	CDH11	5:20494543-20660035	62.3682	11.1863	2.47908	5e-05	0.00164462	cadherin 11 [Source:HGNC Symbol;Acc:HGNC:1750]	GO:0044421,GO:0005576,GO:0031982,GO:0031988,GO:0048731,GO:0007275,GO:0070062,GO:0043230,GO:0065010,GO:0044699,GO:0044767,GO:0048856,GO:0044763,GO:0032502,GO:0005575,GO:0030154,GO:0044707,GO:0071944,GO:0022610,GO:0032501,GO:0005886,GO:0007155,GO:0048869,GO:0005509,GO:0005488,GO:0016020,GO:0016337,GO:0016021,GO:0031224,GO:0044425,GO:0009653,GO:0016043,GO:0071840,GO:0043226,GO:0008150,GO:0043227,GO:…	extracellular region part,extracellular region,vesicle,membrane-bounded vesicle,system development,multicellular organismal development,extracellular vesicular exosome,extracellular organelle,extracellular membrane-bounded organelle,single-organism process,single-organism developmental process,anatomical structure development,single-organism cellular process,developmental process,cellular_compone…	--	--
ENSOCUT00000014454	ENSOCUG00000014458	-	12:10866848-10867241	64.5469	657.79	-3.34921	5e-05	0.00164462	--	GO:0000786,GO:0032993,GO:0046982,GO:0046983,GO:0000785,GO:0044427,GO:0005694,GO:0005575,GO:0005515,GO:0005488,GO:0043228,GO:0043232,GO:0003677,GO:0043226,GO:0043227,GO:0005623,GO:0044464,GO:0003674,GO:0044424,GO:0044422,GO:0044446,GO:0005622,GO:0032991,GO:0043229,GO:0043231,GO:0005634,GO:1901363,GO:0097159,GO:0003676	nucleosome,protein-DNA complex,protein heterodimerization activity,protein dimerization activity,chromatin,chromosomal part,chromosome,cellular_component,protein binding,binding,non-membrane-bounded organelle,intracellular non-membrane-bounded organelle,DNA binding,organelle,membrane-bounded organelle,cell,cell part,molecular_function,intracellular part,organelle part,intracellular organelle part…	ocu05322,ocu05034	Systemic lupus erythematosus,Alcoholism
ENSOCUT00000009863	ENSOCUG00000009863	PRKCQ	16:10723502-10823035	0.983615	30.5867	-4.95867	5e-05	0.00164462	protein kinase C theta [Source:HGNC Symbol;Acc:HGNC:9410]	GO:0002376,GO:0006955,GO:0045321,GO:0001775,GO:0002682,GO:0002684,GO:0046649,GO:0050865,GO:0002694,GO:0001816,GO:0042110,GO:0051249,GO:0001817,GO:0051239,GO:0051251,GO:0050896,GO:0002696,GO:0070887,GO:0050867,GO:0010033,GO:0050870,GO:0050863,GO:0006950,GO:0048584,GO:0050778,GO:0044459,GO:0050776,GO:0048518,GO:0044699,GO:0046651,GO:0009611,GO:0032943,GO:0070661,GO:0060326,GO:0044763,GO:0016477,GO:…	immune system process,immune response,leukocyte activation,cell activation,regulation of immune system process,positive regulation of immune system process,lymphocyte activation,regulation of cell activation,regulation of leukocyte activation,cytokine production,T cell activation,regulation of lymphocyte activation,regulation of cytokine production,regulation of multicellular organismal process,p…	ocu04660,ocu05162,ocu04064,ocu04750,ocu04530,ocu04920,ocu04270	T cell receptor signaling pathway,Measles,NF-kappa B signaling pathway,Inflammatory mediator regulation of TRP channels,Tight junction,Adipocytokine signaling pathway,Vascular smooth muscle contraction
ENSOCUT00000026659	ENSOCUG00000027505	SIT1	1:18274545-18275859	1.34478	74.6418	-5.79454	5e-05	0.00164462	signaling threshold regulating transmembrane adaptor 1 [Source:HGNC Symbol;Acc:HGNC:17710]	GO:0002376,GO:0045321,GO:0001775,GO:0002682,GO:0044421,GO:0005576,GO:0046649,GO:0050865,GO:0002694,GO:0042110,GO:0051249,GO:0050896,GO:0050863,GO:0031982,GO:0031988,GO:0070062,GO:0043230,GO:0065010,GO:0044699,GO:0044763,GO:0005575,GO:0005515,GO:0071944,GO:0051716,GO:0005886,GO:0005488,GO:0016020,GO:0065007,GO:0016021,GO:0031224,GO:0050794,GO:0007165,GO:0050789,GO:0044425,GO:0048872,GO:0007154,GO:…	immune system process,leukocyte activation,cell activation,regulation of immune system process,extracellular region part,extracellular region,lymphocyte activation,regulation of cell activation,regulation of leukocyte activation,T cell activation,regulation of lymphocyte activation,response to stimulus,regulation of T cell activation,vesicle,membrane-bounded vesicle,extracellular vesicular exosom…	--	--
ENSOCUT00000004171	ENSOCUG00000004172	VSIG4	X:44499065-44569353	184.387	27.9632	2.72114	5e-05	0.00164462	V-set and immunoglobulin domain containing 4 [Source:HGNC Symbol;Acc:HGNC:17032]	GO:0002376,GO:0045321,GO:0001775,GO:0002682,GO:0044421,GO:0005576,GO:0046649,GO:0050865,GO:0002694,GO:0001816,GO:0042110,GO:0051249,GO:0001817,GO:0051239,GO:0050863,GO:0031982,GO:0031988,GO:0070062,GO:0043230,GO:0065010,GO:0044699,GO:0046651,GO:0032943,GO:0070661,GO:0044763,GO:0070663,GO:0005575,GO:0050670,GO:0008283,GO:0032944,GO:0048519,GO:0042127,GO:0044707,GO:0048523,GO:0042098,GO:0032501,GO:…	immune system process,leukocyte activation,cell activation,regulation of immune system process,extracellular region part,extracellular region,lymphocyte activation,regulation of cell activation,regulation of leukocyte activation,cytokine production,T cell activation,regulation of lymphocyte activation,regulation of cytokine production,regulation of multicellular organismal process,regulation of T…	--	--
ENSOCUT00000004173	ENSOCUG00000004169	ASAH1	2:67538687-67574274	228.312	58.5249	1.96389	5e-05	0.00164462	N-acylsphingosine amidohydrolase (acid ceramidase) 1 [Source:HGNC Symbol;Acc:HGNC:735]	GO:0044421,GO:0005576,GO:0031982,GO:0031988,GO:0070062,GO:0043230,GO:0065010,GO:0005615,GO:0005575,GO:0005764,GO:0000323,GO:0005773,GO:0016787,GO:0006629,GO:0043226,GO:0008150,GO:0043227,GO:0005623,GO:0044464,GO:0005737,GO:0044710,GO:0003674,GO:0044424,GO:0005622,GO:0017040,GO:0043229,GO:0003824,GO:0043231,GO:0044444,GO:0044238,GO:0071704,GO:0016810,GO:0008152,GO:0016811	extracellular region part,extracellular region,vesicle,membrane-bounded vesicle,extracellular vesicular exosome,extracellular organelle,extracellular membrane-bounded organelle,extracellular space,cellular_component,lysosome,lytic vacuole,vacuole,hydrolase activity,lipid metabolic process,organelle,biological_process,membrane-bounded organelle,cell,cell part,cytoplasm,single-organism metabolic pr…	ocu04142,ocu00600,ocu04071,ocu01100	Lysosome,Sphingolipid metabolism,Sphingolipid signaling pathway,Metabolic pathways
ENSOCUT00000005139	ENSOCUG00000005133	MKI67	GL018726:2310834-2336198	10.1652	69.5311	-2.77402	5e-05	0.00164462	marker of proliferation Ki-67 [Source:HGNC Symbol;Acc:HGNC:7107]	GO:0048731,GO:0007275,GO:0044699,GO:0048513,GO:0044767,GO:0048856,GO:0044427,GO:0044763,GO:0005694,GO:0032502,GO:0005575,GO:0008283,GO:0005515,GO:0044707,GO:0032501,GO:0005488,GO:0022402,GO:0007049,GO:0016020,GO:0043228,GO:0043232,GO:0000793,GO:0009653,GO:0000775,GO:0050673,GO:0007126,GO:0043226,GO:0008150,GO:0051321,GO:0043227,GO:0005623,GO:0044464,GO:0009887,GO:0005737,GO:0009987,GO:0048610,GO:…	system development,multicellular organismal development,single-organism process,organ development,single-organism developmental process,anatomical structure development,chromosomal part,single-organism cellular process,chromosome,developmental process,cellular_component,cell proliferation,protein binding,single-multicellular organism process,multicellular organismal process,binding,cell cycle pro…	--	--
ENSOCUT00000034062	ENSOCUG00000021584	DOK3	3:58008131-58015240	12.2544	1.21789	3.33084	5e-05	0.00164462	docking protein 3 [Source:HGNC Symbol;Acc:HGNC:24583]	GO:0050896,GO:0044699,GO:0044763,GO:0005575,GO:0005515,GO:0051716,GO:0005102,GO:0005488,GO:0065007,GO:0050794,GO:0035556,GO:0007165,GO:0050789,GO:0007154,GO:0044700,GO:0023052,GO:0008150,GO:0032403,GO:0005623,GO:0044464,GO:0005737,GO:0009987,GO:0003674,GO:0007265,GO:0044424,GO:0005622,GO:0007264,GO:0005158	response to stimulus,single-organism process,single-organism cellular process,cellular_component,protein binding,cellular response to stimulus,receptor binding,binding,biological regulation,regulation of cellular process,intracellular signal transduction,signal transduction,regulation of biological process,cell communication,single organism signaling,signaling,biological_process,protein complex b…	--	--
ENSOCUT00000029021	ENSOCUG00000025803	-	19:20276449-20290378	48.3554	5.53079	3.12812	5e-05	0.00164462	--	GO:0005488,GO:0030246,GO:0003674	binding,carbohydrate binding,molecular_function	--	--
ENSOCUT00000011632	ENSOCUG00000011633	MYB	12:125582166-125617099	0.33224	38.9927	-6.87483	5e-05	0.00164462	MYB proto-oncogene, transcription factor [Source:HGNC Symbol;Acc:HGNC:7545]	GO:0002376,GO:0006955,GO:0045321,GO:0001775,GO:0002682,GO:0002684,GO:0046649,GO:0002521,GO:0050865,GO:0002694,GO:0002520,GO:0042110,GO:0030097,GO:0048534,GO:0051249,GO:0051239,GO:0030098,GO:0051251,GO:0050896,GO:0002696,GO:0050867,GO:0050870,GO:0050863,GO:0048731,GO:0050776,GO:0007275,GO:0030217,GO:0048518,GO:0044699,GO:0048513,GO:0044767,GO:0048856,GO:0044763,GO:0048522,GO:0048583,GO:0032502,GO:…	immune system process,immune response,leukocyte activation,cell activation,regulation of immune system process,positive regulation of immune system process,lymphocyte activation,leukocyte differentiation,regulation of cell activation,regulation of leukocyte activation,immune system development,T cell activation,hemopoiesis,hematopoietic or lymphoid organ development,regulation of lymphocyte activ…	ocu04151,ocu05166	PI3K-Akt signaling pathway,HTLV-I infection
ENSOCUT00000002009	ENSOCUG00000002009	NCF2	GL018994:103308-118607	34.0385	5.61116	2.6008	5e-05	0.00164462	Oryctolagus cuniculus neutrophil cytosolic factor 2 (NCF2), mRNA. [Source:RefSeq mRNA;Acc:NM_001082101]	GO:0031982,GO:0031988,GO:0005575,GO:0005515,GO:0005488,GO:0043228,GO:0043232,GO:0031410,GO:0016023,GO:0043226,GO:0008150,GO:0043227,GO:0019899,GO:0030141,GO:0005623,GO:0044464,GO:0072593,GO:0005737,GO:0009987,GO:0031267,GO:0017016,GO:0016175,GO:0051020,GO:0003674,GO:0044424,GO:0050664,GO:0048365,GO:0044422,GO:0042554,GO:0044446,GO:0005622,GO:0043229,GO:0008022,GO:0006801,GO:0017048,GO:0001669,GO:…	vesicle,membrane-bounded vesicle,cellular_component,protein binding,binding,non-membrane-bounded organelle,intracellular non-membrane-bounded organelle,cytoplasmic vesicle,cytoplasmic membrane-bounded vesicle,organelle,biological_process,membrane-bounded organelle,enzyme binding,secretory granule,cell,cell part,reactive oxygen species metabolic process,cytoplasm,cellular process,small GTPase bind…	ocu04145,ocu05140,ocu04380,ocu04670	Phagosome,Leishmaniasis,Osteoclast differentiation,Leukocyte transendothelial migration
ENSOCUT00000009772	ENSOCUG00000009774	LAPTM5	13:135265127-135450408	250.38	55.6038	2.17087	5e-05	0.00164462	lysosomal protein transmembrane 5 [Source:HGNC Symbol;Acc:HGNC:29612]	GO:0044459,GO:0005575,GO:0005515,GO:0051179,GO:0071944,GO:0005886,GO:0005764,GO:0000323,GO:0005488,GO:0005773,GO:0016020,GO:0016021,GO:0031224,GO:0044425,GO:0051234,GO:0006810,GO:0031226,GO:0043226,GO:0008150,GO:0043227,GO:0005887,GO:0005623,GO:0044464,GO:0005737,GO:0044437,GO:0005765,GO:0003674,GO:0005774,GO:0044424,GO:0044422,GO:0044446,GO:0005622,GO:0043229,GO:0043231,GO:0044444,GO:0031090	plasma membrane part,cellular_component,protein binding,localization,cell periphery,plasma membrane,lysosome,lytic vacuole,binding,vacuole,membrane,integral to membrane,intrinsic to membrane,membrane part,establishment of localization,transport,intrinsic to plasma membrane,organelle,biological_process,membrane-bounded organelle,integral to plasma membrane,cell,cell part,cytoplasm,vacuolar part,ly…	ocu04142	Lysosome
ENSOCUT00000000433	ENSOCUG00000000436	-	GL018782:409127-424391	0.394115	28.024	-6.1519	5e-05	0.00164462	--	GO:0050896,GO:0044699,GO:0044763,GO:0005575,GO:0051716,GO:0016020,GO:0065007,GO:0016021,GO:0031224,GO:0050794,GO:0007165,GO:0050789,GO:0044425,GO:0007154,GO:0044700,GO:0023052,GO:0007166,GO:0008150,GO:0009987,GO:0003674,GO:0004872,GO:0004871,GO:0060089,GO:0038023,GO:0004888	response to stimulus,single-organism process,single-organism cellular process,cellular_component,cellular response to stimulus,membrane,biological regulation,integral to membrane,intrinsic to membrane,regulation of cellular process,signal transduction,regulation of biological process,membrane part,cell communication,single organism signaling,signaling,cell surface receptor signaling pathway,biolo…	ocu04640,ocu04660,ocu05162,ocu05142,ocu05166	Hematopoietic cell lineage,T cell receptor signaling pathway,Measles,Chagas disease (American trypanosomiasis),HTLV-I infection
ENSOCUT00000000437	ENSOCUG00000000438	-	GL018782:403355-407309	10.6753	645.21	-5.91742	5e-05	0.00164462	--	GO:0050896,GO:0044459,GO:0044699,GO:0044763,GO:0005575,GO:0071944,GO:0051716,GO:0005886,GO:0016020,GO:0065007,GO:0050794,GO:0007165,GO:0050789,GO:0044425,GO:0042101,GO:0007154,GO:0044700,GO:0023052,GO:0043235,GO:0007166,GO:0008150,GO:0005623,GO:0044464,GO:0009987,GO:0003674,GO:0004872,GO:0032991,GO:0004871,GO:0060089,GO:0038023,GO:0043234,GO:0004888	response to stimulus,plasma membrane part,single-organism process,single-organism cellular process,cellular_component,cell periphery,cellular response to stimulus,plasma membrane,membrane,biological regulation,regulation of cellular process,signal transduction,regulation of biological process,membrane part,T cell receptor complex,cell communication,single organism signaling,signaling,receptor com…	ocu04640,ocu05340,ocu04660,ocu05162,ocu05142,ocu05166	Hematopoietic cell lineage,Primary immunodeficiency,T cell receptor signaling pathway,Measles,Chagas disease (American trypanosomiasis),HTLV-I infection
ENSOCUT00000029479	ENSOCUG00000007702	TBC1D10C	1:194839407-194845681	0.85267	9.01987	-3.40305	5e-05	0.00164462	TBC1 domain family member 10C [Source:HGNC Symbol;Acc:HGNC:24702]	GO:0002376,GO:0045321,GO:0001775,GO:0002682,GO:0046649,GO:0050865,GO:0002694,GO:0051249,GO:0050896,GO:0044459,GO:0044699,GO:0044763,GO:0048583,GO:0005575,GO:0005515,GO:0048519,GO:0051179,GO:0032879,GO:0048523,GO:0071944,GO:0042113,GO:0051716,GO:0007243,GO:0005886,GO:0009966,GO:0010627,GO:0050866,GO:0002683,GO:0023051,GO:0051223,GO:0032880,GO:0002695,GO:0005488,GO:0051049,GO:0000165,GO:0010646,GO:…	immune system process,leukocyte activation,cell activation,regulation of immune system process,lymphocyte activation,regulation of cell activation,regulation of leukocyte activation,regulation of lymphocyte activation,response to stimulus,plasma membrane part,single-organism process,single-organism cellular process,regulation of response to stimulus,cellular_component,protein binding,negative reg…	--	--
ENSOCUT00000031836	ENSOCUG00000021784	GALNS	GL019360:50892-70641	28.349	5.94383	2.25384	5e-05	0.00164462	galactosamine (N-acetyl)-6-sulfatase [Source:HGNC Symbol;Acc:HGNC:4122]	GO:0044421,GO:0005576,GO:0031982,GO:0031988,GO:0070062,GO:0043230,GO:0065010,GO:0005575,GO:0016787,GO:0043226,GO:0008150,GO:0043227,GO:0008484,GO:0003674,GO:0003824,GO:0016788,GO:0008152	extracellular region part,extracellular region,vesicle,membrane-bounded vesicle,extracellular vesicular exosome,extracellular organelle,extracellular membrane-bounded organelle,cellular_component,hydrolase activity,organelle,biological_process,membrane-bounded organelle,sulfuric ester hydrolase activity,molecular_function,catalytic activity,hydrolase activity, acting on ester bonds,metabolic proc…	ocu04142,ocu00531,ocu01100	Lysosome,Glycosaminoglycan degradation,Metabolic pathways
ENSOCUT00000020923	ENSOCUG00000017519	MYO10	11:41506873-41772958	20.5473	4.52228	2.18383	5e-05	0.00164462	--	GO:0050896,GO:0048518,GO:0044699,GO:0044763,GO:0048522,GO:0005575,GO:0005515,GO:0022610,GO:0051716,GO:0007155,GO:0005488,GO:0043228,GO:0043232,GO:0065007,GO:0030155,GO:0016337,GO:0050794,GO:0005856,GO:0007165,GO:0050789,GO:0044430,GO:0022407,GO:0003774,GO:0007154,GO:0044700,GO:0023052,GO:0016787,GO:0043226,GO:0008150,GO:0043168,GO:0015629,GO:0045785,GO:0032559,GO:0030554,GO:0005524,GO:0005623,GO:…	response to stimulus,positive regulation of biological process,single-organism process,single-organism cellular process,positive regulation of cellular process,cellular_component,protein binding,biological adhesion,cellular response to stimulus,cell adhesion,binding,non-membrane-bounded organelle,intracellular non-membrane-bounded organelle,biological regulation,regulation of cell adhesion,cell-c…	ocu04666	Fc gamma R-mediated phagocytosis
ENSOCUT00000028603	ENSOCUG00000026988	CHI3L1	16:68595411-68603910	26.2002	2.39324	3.45254	5e-05	0.00164462	chitinase 3 like 1 [Source:HGNC Symbol;Acc:HGNC:1932]	GO:0044421,GO:0005576,GO:0001816,GO:0006952,GO:0051239,GO:0050896,GO:0070887,GO:0010033,GO:0031982,GO:0031988,GO:0006950,GO:0048584,GO:0048731,GO:0007275,GO:0070062,GO:0043230,GO:0065010,GO:0006954,GO:0048518,GO:0044699,GO:0009611,GO:0048513,GO:0005615,GO:0044767,GO:0034097,GO:0048856,GO:0044763,GO:0048522,GO:0048583,GO:0032502,GO:0009605,GO:2000026,GO:0005575,GO:0009306,GO:0042221,GO:0071310,GO:…	extracellular region part,extracellular region,cytokine production,defense response,regulation of multicellular organismal process,response to stimulus,cellular response to chemical stimulus,response to organic substance,vesicle,membrane-bounded vesicle,response to stress,positive regulation of response to stimulus,system development,multicellular organismal development,extracellular vesicular ex…	--	--
ENSOCUT00000009051	ENSOCUG00000009055	CD69	8:34328309-34336194	5.26103	25.5705	-2.28106	5e-05	0.00164462	CD69 molecule [Source:HGNC Symbol;Acc:HGNC:1694]	GO:0009986,GO:0050896,GO:0070887,GO:0044459,GO:0044699,GO:0044763,GO:0009897,GO:0005575,GO:0005515,GO:0042221,GO:0071944,GO:0051716,GO:0005886,GO:0005488,GO:0016020,GO:0016021,GO:0031224,GO:0044425,GO:0008150,GO:0005623,GO:0042493,GO:0044464,GO:0009987,GO:0035690,GO:0003674	cell surface,response to stimulus,cellular response to chemical stimulus,plasma membrane part,single-organism process,single-organism cellular process,external side of plasma membrane,cellular_component,protein binding,response to chemical stimulus,cell periphery,cellular response to stimulus,plasma membrane,binding,membrane,integral to membrane,intrinsic to membrane,membrane part,biological_proc…	--	--
ENSOCUT00000002556	ENSOCUG00000017492	CENPF	16:58555222-58614044	6.99286	37.6281	-2.42785	5e-05	0.00164462	centromere protein F [Source:HGNC Symbol;Acc:HGNC:1857]	GO:0051239,GO:0048731,GO:0007275,GO:0046983,GO:0044699,GO:0048513,GO:0044767,GO:0048856,GO:0044427,GO:0044763,GO:0005694,GO:0032502,GO:2000026,GO:0005575,GO:0005515,GO:0048519,GO:0051179,GO:0044707,GO:0048523,GO:0032501,GO:0050793,GO:0000278,GO:0007059,GO:0005488,GO:0022402,GO:0007049,GO:0007346,GO:0043228,GO:0043232,GO:0065007,GO:0050794,GO:0005856,GO:0051726,GO:0050789,GO:0051234,GO:0044430,GO:…	regulation of multicellular organismal process,system development,multicellular organismal development,protein dimerization activity,single-organism process,organ development,single-organism developmental process,anatomical structure development,chromosomal part,single-organism cellular process,chromosome,developmental process,regulation of multicellular organismal development,cellular_component,…	--	--
ENSOCUT00000015306	ENSOCUG00000015300	ACAP1	19:11802392-11815539	3.75592	31.0352	-3.04667	5e-05	0.00164462	ArfGAP with coiled-coil, ankyrin repeat and PH domains 1 [Source:HGNC Symbol;Acc:HGNC:16467]	GO:0005575,GO:0005515,GO:0005488,GO:0016020,GO:0065007,GO:0044093,GO:0050794,GO:0050789,GO:0065009,GO:0043085,GO:0051174,GO:0019220,GO:0050790,GO:0006793,GO:0008150,GO:0006796,GO:0051336,GO:0044710,GO:0009987,GO:0080090,GO:1901565,GO:0019222,GO:0003674,GO:0031323,GO:0051345,GO:0008047,GO:0009894,GO:1901575,GO:0005096,GO:1901136,GO:0044281,GO:0031329,GO:0009056,GO:1901135,GO:1900542,GO:1901564,GO:…	cellular_component,protein binding,binding,membrane,biological regulation,positive regulation of molecular function,regulation of cellular process,regulation of biological process,regulation of molecular function,positive regulation of catalytic activity,regulation of phosphorus metabolic process,regulation of phosphate metabolic process,regulation of catalytic activity,phosphorus metabolic proce…	ocu04144	Endocytosis
ENSOCUT00000006060	ENSOCUG00000006061	THEMIS	12:117527345-117725510	1.8095	257.588	-7.15333	5e-05	0.00164462	thymocyte selection associated [Source:HGNC Symbol;Acc:HGNC:21569]	GO:0002376,GO:0006955,GO:0045321,GO:0001775,GO:0002682,GO:0002684,GO:0046649,GO:0002521,GO:0002520,GO:0042110,GO:0030097,GO:0048534,GO:0030098,GO:0050896,GO:0048584,GO:0048731,GO:0050778,GO:0050776,GO:0007275,GO:0030217,GO:0048518,GO:0044699,GO:0002764,GO:0048513,GO:0044767,GO:0048856,GO:0002757,GO:0044763,GO:0002253,GO:0048583,GO:0032502,GO:0005575,GO:0005515,GO:0030154,GO:0044707,GO:0002768,GO:…	immune system process,immune response,leukocyte activation,cell activation,regulation of immune system process,positive regulation of immune system process,lymphocyte activation,leukocyte differentiation,immune system development,T cell activation,hemopoiesis,hematopoietic or lymphoid organ development,lymphocyte differentiation,response to stimulus,positive regulation of response to stimulus,sys…	--	--
ENSOCUT00000008208	ENSOCUG00000008210	CCR9	9:14238904-14252415	0.220607	30.8732	-7.12873	5e-05	0.00164462	C-C motif chemokine receptor 9 [Source:HGNC Symbol;Acc:HGNC:1610]	GO:0002376,GO:0006955,GO:0045321,GO:0001775,GO:0046649,GO:0002521,GO:0002520,GO:0042110,GO:0030097,GO:0048534,GO:0009986,GO:0030098,GO:0050896,GO:0048731,GO:0007275,GO:0030217,GO:0044699,GO:0048513,GO:0044767,GO:0048856,GO:0044763,GO:0032502,GO:0009605,GO:0005575,GO:0005515,GO:0040011,GO:0042221,GO:0006935,GO:0042330,GO:0030154,GO:0044707,GO:0032501,GO:0051716,GO:0048869,GO:0005488,GO:0004896,GO:…	immune system process,immune response,leukocyte activation,cell activation,lymphocyte activation,leukocyte differentiation,immune system development,T cell activation,hemopoiesis,hematopoietic or lymphoid organ development,cell surface,lymphocyte differentiation,response to stimulus,system development,multicellular organismal development,T cell differentiation,single-organism process,organ develo…	ocu04060,ocu04672,ocu04062	Cytokine-cytokine receptor interaction,Intestinal immune network for IgA production,Chemokine signaling pathway
ENSOCUT00000008207	ENSOCUG00000008204	SOAT1	13:6400972-6466975	60.9059	14.4567	2.07485	5e-05	0.00164462	sterol O-acyltransferase 1 [Source:HGNC Symbol;Acc:HGNC:11177]	GO:0048518,GO:0044699,GO:0044763,GO:0048522,GO:0032502,GO:0005575,GO:0005515,GO:0051179,GO:0030154,GO:0044707,GO:0032501,GO:0048869,GO:0005488,GO:0016020,GO:0065007,GO:0016021,GO:0044765,GO:0031224,GO:0010876,GO:0050794,GO:0019915,GO:0051247,GO:0050789,GO:0044425,GO:0051234,GO:0051246,GO:0006810,GO:0006066,GO:0016125,GO:0006869,GO:1901615,GO:0097006,GO:0071702,GO:0008203,GO:0033036,GO:0016043,GO:…	positive regulation of biological process,single-organism process,single-organism cellular process,positive regulation of cellular process,developmental process,cellular_component,protein binding,localization,cell differentiation,single-multicellular organism process,multicellular organismal process,cellular developmental process,binding,membrane,biological regulation,integral to membrane,single-…	ocu00100	Steroid biosynthesis
ENSOCUT00000021176	ENSOCUG00000026402	-	GL018910:352516-406941	1.23982	40.4755	-5.02885	5e-05	0.00164462	--	GO:0005575,GO:0016020,GO:0016021,GO:0031224,GO:0044425	cellular_component,membrane,integral to membrane,intrinsic to membrane,membrane part	ocu04640,ocu04060,ocu04151,ocu05162,ocu05166,ocu04630,ocu04144	Hematopoietic cell lineage,Cytokine-cytokine receptor interaction,PI3K-Akt signaling pathway,Measles,HTLV-I infection,Jak-STAT signaling pathway,Endocytosis
ENSOCUT00000017634	ENSOCUG00000017631	ATP6AP1	GL018816:120276-127444	127.967	41.8158	1.61365	5e-05	0.00164462	V-type proton ATPase subunit S1 precursor [Source:RefSeq peptide;Acc:NP_001164848]	GO:0002376,GO:0002682,GO:0044421,GO:0005576,GO:0002521,GO:0002520,GO:0030097,GO:0048534,GO:0051239,GO:0050896,GO:0031982,GO:0031988,GO:0048584,GO:0048731,GO:0007275,GO:0070062,GO:0043230,GO:0065010,GO:0048518,GO:0044699,GO:0048513,GO:0044767,GO:0048856,GO:0044763,GO:0048522,GO:0048583,GO:0032502,GO:2000026,GO:0005575,GO:0005515,GO:0051179,GO:1902105,GO:0030154,GO:0032940,GO:0044707,GO:0032879,GO:…	immune system process,regulation of immune system process,extracellular region part,extracellular region,leukocyte differentiation,immune system development,hemopoiesis,hematopoietic or lymphoid organ development,regulation of multicellular organismal process,response to stimulus,vesicle,membrane-bounded vesicle,positive regulation of response to stimulus,system development,multicellular organism…	ocu04142,ocu05323,ocu05152,ocu04145,ocu05161,ocu00190,ocu01100	Lysosome,Rheumatoid arthritis,Tuberculosis,Phagosome,Hepatitis B,Oxidative phosphorylation,Metabolic pathways
ENSOCUT00000016580	ENSOCUG00000016580	CTSB	2:38137434-38155835	1325.36	162.594	3.02704	5e-05	0.00164462	cathepsin B [Source:HGNC Symbol;Acc:HGNC:2527]	GO:0044421,GO:0005576,GO:0050896,GO:0070887,GO:0010033,GO:0031982,GO:0031988,GO:0048731,GO:0007275,GO:0070062,GO:0043230,GO:0065010,GO:0044699,GO:0048513,GO:0005615,GO:0044767,GO:0048856,GO:0044763,GO:0032502,GO:0005575,GO:0005515,GO:0040011,GO:0042221,GO:0071310,GO:0030154,GO:0044707,GO:0051704,GO:0032501,GO:0051716,GO:0048869,GO:0005764,GO:0000323,GO:0005488,GO:0005773,GO:0043228,GO:0043232,GO:…	extracellular region part,extracellular region,response to stimulus,cellular response to chemical stimulus,response to organic substance,vesicle,membrane-bounded vesicle,system development,multicellular organismal development,extracellular vesicular exosome,extracellular organelle,extracellular membrane-bounded organelle,single-organism process,organ development,extracellular space,single-organis…	ocu04142,ocu04612	Lysosome,Antigen processing and presentation
ENSOCUT00000012464	ENSOCUG00000012464	CD6	1:193593327-193631770	0.904596	16.6613	-4.20309	5e-05	0.00164462	CD6 molecule [Source:HGNC Symbol;Acc:HGNC:1691]	GO:0002376,GO:0006955,GO:0045321,GO:0001775,GO:0002682,GO:0002684,GO:0046649,GO:0050865,GO:0002694,GO:0001816,GO:0042110,GO:0051249,GO:0006952,GO:0001817,GO:0051239,GO:0051251,GO:0050896,GO:0002696,GO:0070887,GO:0002237,GO:0050867,GO:0010033,GO:0050870,GO:0050863,GO:0006950,GO:0009617,GO:0044459,GO:0006954,GO:0032496,GO:0048518,GO:0044699,GO:0046651,GO:0009611,GO:0032943,GO:0070661,GO:0051707,GO:…	immune system process,immune response,leukocyte activation,cell activation,regulation of immune system process,positive regulation of immune system process,lymphocyte activation,regulation of cell activation,regulation of leukocyte activation,cytokine production,T cell activation,regulation of lymphocyte activation,defense response,regulation of cytokine production,regulation of multicellular org…	ocu04514	Cell adhesion molecules (CAMs)
ENSOCUT00000033919	ENSOCUG00000029401	-	X:41841052-42003181	15.5454	4.34232	1.83995	5e-05	0.00164462	--	GO:0050896,GO:0044699,GO:0044763,GO:0005575,GO:0051716,GO:0018108,GO:0018212,GO:0006468,GO:0005488,GO:0016020,GO:0065007,GO:0016021,GO:0031224,GO:0050794,GO:0007165,GO:0050789,GO:0044425,GO:0016310,GO:0007154,GO:0044700,GO:0023052,GO:0018193,GO:0004713,GO:0007166,GO:0006793,GO:0008150,GO:0043168,GO:0006796,GO:0032559,GO:0030554,GO:0005524,GO:0007167,GO:0035639,GO:0032555,GO:0032550,GO:0001883,GO:…	response to stimulus,single-organism process,single-organism cellular process,cellular_component,cellular response to stimulus,peptidyl-tyrosine phosphorylation,peptidyl-tyrosine modification,protein phosphorylation,binding,membrane,biological regulation,integral to membrane,intrinsic to membrane,regulation of cellular process,signal transduction,regulation of biological process,membrane part,pho…	ocu05323,ocu04060,ocu04151,ocu05202,ocu04510,ocu04066,ocu04015,ocu04014,ocu04144	Rheumatoid arthritis,Cytokine-cytokine receptor interaction,PI3K-Akt signaling pathway,Transcriptional misregulation in cancer,Focal adhesion,HIF-1 signaling pathway,Rap1 signaling pathway,Ras signaling pathway,Endocytosis
ENSOCUT00000025004	ENSOCUG00000023317	ACTN3	1:194167912-194180541	1.29394	9.27697	-2.84188	5e-05	0.00164462	actinin alpha 3 (gene/pseudogene) [Source:HGNC Symbol;Acc:HGNC:165]	GO:0051239,GO:0050896,GO:0048731,GO:0007275,GO:0048518,GO:0044699,GO:0048513,GO:0044767,GO:0048856,GO:0044763,GO:0048522,GO:0048583,GO:0032502,GO:2000026,GO:0005575,GO:0005515,GO:0048519,GO:0030154,GO:0044707,GO:0048523,GO:0051094,GO:0032501,GO:0051716,GO:0050793,GO:0048869,GO:0051240,GO:0009966,GO:0045597,GO:0023051,GO:0005509,GO:0005488,GO:0051241,GO:0010646,GO:0048585,GO:0043228,GO:0043232,GO:…	regulation of multicellular organismal process,response to stimulus,system development,multicellular organismal development,positive regulation of biological process,single-organism process,organ development,single-organism developmental process,anatomical structure development,single-organism cellular process,positive regulation of cellular process,regulation of response to stimulus,developmenta…	ocu05322,ocu05146,ocu05203,ocu04510,ocu04670,ocu05412,ocu04520,ocu04530,ocu04810	Systemic lupus erythematosus,Amoebiasis,Viral carcinogenesis,Focal adhesion,Leukocyte transendothelial migration,Arrhythmogenic right ventricular cardiomyopathy (ARVC),Adherens junction,Tight junction,Regulation of actin cytoskeleton
ENSOCUT00000022300	ENSOCUG00000013152	ATP8A1	2:31473845-31734499	12.6897	51.5205	-2.02149	5e-05	0.00164462	ATPase phospholipid transporting 8A1 [Source:HGNC Symbol;Acc:HGNC:13531]	GO:0044421,GO:0005576,GO:0050896,GO:0031982,GO:0031988,GO:0070062,GO:0043230,GO:0065010,GO:0048518,GO:0044699,GO:0040017,GO:0044763,GO:0051272,GO:0016477,GO:0048522,GO:0030335,GO:0005575,GO:2000147,GO:0005515,GO:0040011,GO:0048870,GO:0051674,GO:0051179,GO:0040012,GO:0030334,GO:0006928,GO:0044707,GO:2000145,GO:0032879,GO:0071944,GO:0051270,GO:0032501,GO:0005886,GO:0005488,GO:0051049,GO:0051050,GO:…	extracellular region part,extracellular region,response to stimulus,vesicle,membrane-bounded vesicle,extracellular vesicular exosome,extracellular organelle,extracellular membrane-bounded organelle,positive regulation of biological process,single-organism process,positive regulation of locomotion,single-organism cellular process,positive regulation of cellular component movement,cell migration,po…	--	--
ENSOCUT00000002823	ENSOCUG00000002814	TOP2A	19:41534352-41569181	10.1341	64.6212	-2.67279	5e-05	0.00164462	topoisomerase (DNA) II alpha [Source:HGNC Symbol;Acc:HGNC:11989]	GO:0002376,GO:0002520,GO:0030097,GO:0048534,GO:0046982,GO:0050896,GO:0006950,GO:0048731,GO:0007275,GO:0046983,GO:0048518,GO:0044699,GO:0048513,GO:0044767,GO:0048856,GO:0044763,GO:0048522,GO:0005694,GO:0032502,GO:0005575,GO:0005515,GO:0030154,GO:0044707,GO:0051704,GO:0032501,GO:0051716,GO:0043067,GO:0042981,GO:0048869,GO:0006915,GO:0012501,GO:0008219,GO:0016265,GO:0010941,GO:0007059,GO:0005488,GO:…	immune system process,immune system development,hemopoiesis,hematopoietic or lymphoid organ development,protein heterodimerization activity,response to stimulus,response to stress,system development,multicellular organismal development,protein dimerization activity,positive regulation of biological process,single-organism process,organ development,single-organism developmental process,anatomical …	--	--
ENSOCUT00000017395	ENSOCUG00000017387	CLSPN	GL018704:2562967-2601221	1.09227	5.18224	-2.24625	5e-05	0.00164462	claspin [Source:HGNC Symbol;Acc:HGNC:19715]	GO:0050896,GO:0006950,GO:0048518,GO:0044699,GO:0044763,GO:0048522,GO:0005575,GO:0005515,GO:0048519,GO:0048523,GO:0051716,GO:0000278,GO:0006468,GO:0005488,GO:0022402,GO:0007049,GO:0007346,GO:0065007,GO:0044093,GO:0050794,GO:0045860,GO:0051247,GO:0051726,GO:0050789,GO:0051347,GO:1901991,GO:0033674,GO:0065009,GO:0016310,GO:1901990,GO:0001934,GO:0010562,GO:0045937,GO:0031399,GO:0001932,GO:0051246,GO:…	response to stimulus,response to stress,positive regulation of biological process,single-organism process,single-organism cellular process,positive regulation of cellular process,cellular_component,protein binding,negative regulation of biological process,negative regulation of cellular process,cellular response to stimulus,mitotic cell cycle,protein phosphorylation,binding,cell cycle process,cel…	--	--
ENSOCUT00000006490	ENSOCUG00000006493	-	13:139370111-139373305	66.4539	502.909	-2.91987	5e-05	0.00164462	--	GO:0044699,GO:0044763,GO:0065007,GO:0050794,GO:0050789,GO:0016043,GO:0000226,GO:0071840,GO:0008150,GO:0007010,GO:0007017,GO:0051128,GO:0051493,GO:0031109,GO:0070507,GO:0009987,GO:0033043,GO:0032886,GO:0031110,GO:0006996	single-organism process,single-organism cellular process,biological regulation,regulation of cellular process,regulation of biological process,cellular component organization,microtubule cytoskeleton organization,cellular component organization or biogenesis,biological_process,cytoskeleton organization,microtubule-based process,regulation of cellular component organization,regulation of cytoskele…	ocu05206,ocu04010	MicroRNAs in cancer,MAPK signaling pathway
ENSOCUT00000003462	ENSOCUG00000023535	-	13:42144543-42144924	111.745	529.73	-2.24504	5e-05	0.00164462	histone cluster 2, H2be [Source:HGNC Symbol;Acc:HGNC:4760]	GO:0002376,GO:0000786,GO:0006955,GO:0032993,GO:0044421,GO:0005576,GO:0006952,GO:0046982,GO:0050896,GO:0031982,GO:0031988,GO:0006950,GO:0009617,GO:0046983,GO:0070062,GO:0043230,GO:0065010,GO:0005615,GO:0051707,GO:0000785,GO:0009607,GO:0044427,GO:0005694,GO:0045087,GO:0005575,GO:0005515,GO:0051704,GO:0005488,GO:0043228,GO:0043232,GO:0003677,GO:0050830,GO:0042742,GO:0006959,GO:0002227,GO:0043226,GO:…	immune system process,nucleosome,immune response,protein-DNA complex,extracellular region part,extracellular region,defense response,protein heterodimerization activity,response to stimulus,vesicle,membrane-bounded vesicle,response to stress,response to bacterium,protein dimerization activity,extracellular vesicular exosome,extracellular organelle,extracellular membrane-bounded organelle,extracel…	ocu05322,ocu05034,ocu05203	Systemic lupus erythematosus,Alcoholism,Viral carcinogenesis
ENSOCUT00000004896	ENSOCUG00000004895	ADAMTSL1	1:35015633-35465738	12.455	3.50767	1.82813	5e-05	0.00164462	ADAMTS like 1 [Source:HGNC Symbol;Acc:HGNC:14632]	GO:0044421,GO:0005576,GO:0031012,GO:0005575,GO:0005578,GO:0005488,GO:0016787,GO:0008233,GO:0070011,GO:0008150,GO:0008237,GO:0006508,GO:0043167,GO:0003674,GO:0019538,GO:0046872,GO:0003824,GO:0043169,GO:0046914,GO:0008270,GO:0044238,GO:0071704,GO:0043170,GO:0008152	extracellular region part,extracellular region,extracellular matrix,cellular_component,proteinaceous extracellular matrix,binding,hydrolase activity,peptidase activity,peptidase activity, acting on L-amino acid peptides,biological_process,metallopeptidase activity,proteolysis,ion binding,molecular_function,protein metabolic process,metal ion binding,catalytic activity,cation binding,transition me…	--	--
ENSOCUT00000028683	ENSOCUG00000010144	TTC22	13:112126803-112145762	0	1.96345	#NAME?	5e-05	0.00164462	tetratricopeptide repeat domain 22 [Source:HGNC Symbol;Acc:HGNC:26067]	--	--	--	--
ENSOCUT00000030150	ENSOCUG00000013382	STX3	1:192588812-192617706	8.7535	1.98964	2.13735	5e-05	0.00164462	syntaxin 3 [Source:HGNC Symbol;Acc:HGNC:11438]	GO:0044421,GO:0005576,GO:0051239,GO:0050896,GO:0031982,GO:0031988,GO:0048584,GO:0044459,GO:0070062,GO:0043230,GO:0065010,GO:0048518,GO:0044699,GO:0040017,GO:0044763,GO:0048522,GO:0048583,GO:0009605,GO:0005575,GO:0008283,GO:0005515,GO:0040011,GO:0042221,GO:0006935,GO:0042330,GO:0051179,GO:0040012,GO:0032940,GO:0042127,GO:0044707,GO:0032879,GO:0071944,GO:0022610,GO:0032501,GO:0023056,GO:0010647,GO:…	extracellular region part,extracellular region,regulation of multicellular organismal process,response to stimulus,vesicle,membrane-bounded vesicle,positive regulation of response to stimulus,plasma membrane part,extracellular vesicular exosome,extracellular organelle,extracellular membrane-bounded organelle,positive regulation of biological process,single-organism process,positive regulation of …	ocu04721,ocu04130	Synaptic vesicle cycle,SNARE interactions in vesicular transport
ENSOCUT00000025155	ENSOCUG00000025091	AARD	3:132708994-132715288	0.590641	45.778	-6.27623	5e-05	0.00164462	alanine and arginine rich domain containing protein [Source:HGNC Symbol;Acc:HGNC:33842]	--	--	--	--
ENSOCUT00000025972	ENSOCUG00000026334	GPNMB	10:8328033-8362824	794.611	11.2885	6.13732	5e-05	0.00164462	glycoprotein nmb [Source:HGNC Symbol;Acc:HGNC:4462]	GO:0001816,GO:0001817,GO:0051239,GO:0031982,GO:0031988,GO:0044459,GO:0044699,GO:0044763,GO:0005575,GO:0005515,GO:0048519,GO:0071706,GO:0044707,GO:0032640,GO:0032680,GO:0071944,GO:0022610,GO:0032501,GO:0005886,GO:0007155,GO:0097367,GO:0005102,GO:0005488,GO:0001818,GO:0051241,GO:0005539,GO:0016020,GO:0005178,GO:0065007,GO:0016021,GO:0031224,GO:0050789,GO:0044425,GO:0032720,GO:0031410,GO:0016023,GO:…	cytokine production,regulation of cytokine production,regulation of multicellular organismal process,vesicle,membrane-bounded vesicle,plasma membrane part,single-organism process,single-organism cellular process,cellular_component,protein binding,negative regulation of biological process,tumor necrosis factor superfamily cytokine production,single-multicellular organism process,tumor necrosis fac…	--	--
ENSOCUT00000003059	ENSOCUG00000003056	LYN	3:71427555-71567621	43.1169	10.9367	1.97907	5e-05	0.00164462	LYN proto-oncogene, Src family tyrosine kinase [Source:HGNC Symbol;Acc:HGNC:6735]	GO:0002376,GO:0006955,GO:0045321,GO:0001775,GO:0002682,GO:0044421,GO:0005576,GO:0002684,GO:0046649,GO:0002521,GO:0050865,GO:0002694,GO:0002520,GO:0001816,GO:0030097,GO:0048534,GO:0051249,GO:0006952,GO:0001817,GO:0051239,GO:0050896,GO:0070887,GO:0002237,GO:0010033,GO:0031982,GO:0031988,GO:0006950,GO:0048584,GO:0009617,GO:0048731,GO:0050778,GO:0050776,GO:0007275,GO:0070062,GO:0043230,GO:0065010,GO:…	immune system process,immune response,leukocyte activation,cell activation,regulation of immune system process,extracellular region part,extracellular region,positive regulation of immune system process,lymphocyte activation,leukocyte differentiation,regulation of cell activation,regulation of leukocyte activation,immune system development,cytokine production,hemopoiesis,hematopoietic or lymphoid…	ocu04064,ocu05203,ocu04062,ocu04730,ocu04611,ocu04662,ocu04666,ocu05169,ocu04664	NF-kappa B signaling pathway,Viral carcinogenesis,Chemokine signaling pathway,Long-term depression,Platelet activation,B cell receptor signaling pathway,Fc gamma R-mediated phagocytosis,Epstein-Barr virus infection,Fc epsilon RI signaling pathway
ENSOCUT00000003057	ENSOCUG00000003059	CTBS	13:80350648-80431244	128.352	25.6746	2.32169	5e-05	0.00164462	chitobiase [Source:HGNC Symbol;Acc:HGNC:2496]	GO:0044421,GO:0005576,GO:0031982,GO:0031988,GO:0070062,GO:0043230,GO:0065010,GO:0005615,GO:0005575,GO:0046348,GO:1901072,GO:0004553,GO:0016787,GO:1901071,GO:0016798,GO:0006026,GO:0004568,GO:0006030,GO:0006032,GO:0043226,GO:0008150,GO:0043227,GO:0006040,GO:0006022,GO:1901565,GO:0003674,GO:1901575,GO:1901136,GO:0009056,GO:1901135,GO:1901564,GO:0003824,GO:0005975,GO:0044238,GO:0071704,GO:0009057,GO:…	extracellular region part,extracellular region,vesicle,membrane-bounded vesicle,extracellular vesicular exosome,extracellular organelle,extracellular membrane-bounded organelle,extracellular space,cellular_component,amino sugar catabolic process,glucosamine-containing compound catabolic process,hydrolase activity, hydrolyzing O-glycosyl compounds,hydrolase activity,glucosamine-containing compound…	--	--
ENSOCUT00000024169	ENSOCUG00000005722	CERS6	7:108176893-108508100	6.83473	75.6381	-3.46816	5e-05	0.00164462	ceramide synthase 6 [Source:HGNC Symbol;Acc:HGNC:23826]	GO:0005575,GO:0005488,GO:0016020,GO:0016021,GO:0031224,GO:0044425,GO:0003677,GO:0006629,GO:0008610,GO:0043226,GO:0008150,GO:0043227,GO:0044255,GO:0005623,GO:0044464,GO:0005737,GO:0044710,GO:0009987,GO:0003674,GO:0006643,GO:0044424,GO:0006665,GO:0030148,GO:0005622,GO:0005783,GO:0050291,GO:0043229,GO:1901564,GO:0046467,GO:0003824,GO:1901566,GO:0043231,GO:0005634,GO:0044444,GO:0046513,GO:0006672,GO:…	cellular_component,binding,membrane,integral to membrane,intrinsic to membrane,membrane part,DNA binding,lipid metabolic process,lipid biosynthetic process,organelle,biological_process,membrane-bounded organelle,cellular lipid metabolic process,cell,cell part,cytoplasm,single-organism metabolic process,cellular process,molecular_function,membrane lipid metabolic process,intracellular part,sphingo…	ocu00600,ocu04071,ocu01100	Sphingolipid metabolism,Sphingolipid signaling pathway,Metabolic pathways
ENSOCUT00000007864	ENSOCUG00000007865	-	GL018823:15425-28188	0.560742	31.4173	-5.80808	5e-05	0.00164462	--	GO:0050896,GO:0044699,GO:0044763,GO:0005575,GO:0051716,GO:0016020,GO:0065007,GO:0016021,GO:0031224,GO:0050794,GO:0007165,GO:0050789,GO:0044425,GO:0007154,GO:0044700,GO:0023052,GO:0007166,GO:0008150,GO:0009987,GO:0003674,GO:0004872,GO:0004871,GO:0060089,GO:0038023,GO:0004888	response to stimulus,single-organism process,single-organism cellular process,cellular_component,cellular response to stimulus,membrane,biological regulation,integral to membrane,intrinsic to membrane,regulation of cellular process,signal transduction,regulation of biological process,membrane part,cell communication,single organism signaling,signaling,cell surface receptor signaling pathway,biolo…	ocu04640,ocu04660,ocu05162,ocu05142,ocu05166	Hematopoietic cell lineage,T cell receptor signaling pathway,Measles,Chagas disease (American trypanosomiasis),HTLV-I infection
ENSOCUT00000000715	ENSOCUG00000000715	CD44	1:174450771-174540825	98.8998	27.216	1.86151	5e-05	0.00164462	CD44 molecule (Indian blood group) [Source:HGNC Symbol;Acc:HGNC:1681]	GO:0044421,GO:0005576,GO:0009986,GO:0051239,GO:0050896,GO:0070887,GO:0010033,GO:0031982,GO:0031988,GO:0006950,GO:0048584,GO:0048731,GO:0007275,GO:0070062,GO:0043230,GO:0065010,GO:0048518,GO:0044699,GO:0048513,GO:0044767,GO:0034097,GO:0048856,GO:0044763,GO:0048522,GO:0048583,GO:0032502,GO:2000026,GO:0005575,GO:0005515,GO:0042221,GO:0071310,GO:0071345,GO:0048519,GO:0044707,GO:0048523,GO:0071944,GO:…	extracellular region part,extracellular region,cell surface,regulation of multicellular organismal process,response to stimulus,cellular response to chemical stimulus,response to organic substance,vesicle,membrane-bounded vesicle,response to stress,positive regulation of response to stimulus,system development,multicellular organismal development,extracellular vesicular exosome,extracellular orga…	ocu04640,ocu04512,ocu05206,ocu05169,ocu05205	Hematopoietic cell lineage,ECM-receptor interaction,MicroRNAs in cancer,Epstein-Barr virus infection,Proteoglycans in cancer
ENSOCUT00000024291	ENSOCUG00000001855	CD3E	GL018782:375734-390702	1.19085	52.4914	-5.46202	5e-05	0.00164462	T-cell surface glycoprotein CD3 epsilon chain precursor [Source:RefSeq peptide;Acc:NP_001075470]	GO:0050896,GO:0044699,GO:0044763,GO:0005575,GO:0051716,GO:0016020,GO:0065007,GO:0050794,GO:0007165,GO:0050789,GO:0007154,GO:0044700,GO:0023052,GO:0007166,GO:0008150,GO:0009987,GO:0003674,GO:0004872,GO:0004871,GO:0060089,GO:0038023,GO:0004888	response to stimulus,single-organism process,single-organism cellular process,cellular_component,cellular response to stimulus,membrane,biological regulation,regulation of cellular process,signal transduction,regulation of biological process,cell communication,single organism signaling,signaling,cell surface receptor signaling pathway,biological_process,cellular process,molecular_function,recepto…	ocu04640,ocu05340,ocu04660,ocu05162,ocu05142,ocu05166	Hematopoietic cell lineage,Primary immunodeficiency,T cell receptor signaling pathway,Measles,Chagas disease (American trypanosomiasis),HTLV-I infection
ENSOCUT00000033999	ENSOCUG00000029200	ANGPTL5	1:114907446-114912596	0	1.47436	#NAME?	5e-05	0.00164462	--	--	--	--	--
ENSOCUT00000021527	ENSOCUG00000028059	NLRC3	GL018828:763089-777861	2.40544	15.7753	-2.7133	5e-05	0.00164462	NLR family CARD domain containing 3 [Source:HGNC Symbol;Acc:HGNC:29889]	GO:0002376,GO:0045321,GO:0001775,GO:0046649,GO:0001816,GO:0042110,GO:0001817,GO:0051239,GO:0050896,GO:0044699,GO:0044763,GO:0048583,GO:0005575,GO:0048519,GO:0071706,GO:0044707,GO:0032640,GO:0032680,GO:0048523,GO:0032501,GO:0051716,GO:0007243,GO:0009966,GO:0010627,GO:0023051,GO:0005488,GO:0001818,GO:0051241,GO:0010646,GO:0048585,GO:0065007,GO:0050794,GO:0035556,GO:0007165,GO:0050789,GO:0065009,GO:…	immune system process,leukocyte activation,cell activation,lymphocyte activation,cytokine production,T cell activation,regulation of cytokine production,regulation of multicellular organismal process,response to stimulus,single-organism process,single-organism cellular process,regulation of response to stimulus,cellular_component,negative regulation of biological process,tumor necrosis factor sup…	--	--
ENSOCUT00000023385	ENSOCUG00000008785	IGF2R	12:149773363-149860242	71.9816	13.7396	2.38929	5e-05	0.00164462	insulin like growth factor 2 receptor [Source:HGNC Symbol;Acc:HGNC:5467]	GO:0044421,GO:0005576,GO:0009986,GO:0031982,GO:0031988,GO:0070062,GO:0043230,GO:0065010,GO:0005575,GO:0005515,GO:0051179,GO:0005488,GO:0016020,GO:0016021,GO:0031224,GO:0044425,GO:0051234,GO:0006810,GO:0030246,GO:0031410,GO:0016023,GO:0030054,GO:0042802,GO:0019838,GO:0030139,GO:0070161,GO:0043226,GO:0008150,GO:0030136,GO:0043227,GO:0005912,GO:0001948,GO:0005623,GO:0044464,GO:0005737,GO:0048029,GO:…	extracellular region part,extracellular region,cell surface,vesicle,membrane-bounded vesicle,extracellular vesicular exosome,extracellular organelle,extracellular membrane-bounded organelle,cellular_component,protein binding,localization,binding,membrane,integral to membrane,intrinsic to membrane,membrane part,establishment of localization,transport,carbohydrate binding,cytoplasmic vesicle,cytopl…	ocu04142	Lysosome
ENSOCUT00000011787	ENSOCUG00000011780	CYFIP2	3:38752688-38858378	3.01422	20.2654	-2.74916	5e-05	0.00164462	cytoplasmic FMR1 interacting protein 2 [Source:HGNC Symbol;Acc:HGNC:13760]	GO:0044421,GO:0005576,GO:0031982,GO:0031988,GO:0070062,GO:0043230,GO:0065010,GO:0048518,GO:0044699,GO:0044763,GO:0048522,GO:0005575,GO:0005515,GO:0022610,GO:0007155,GO:0006915,GO:0012501,GO:0008219,GO:0016265,GO:0005488,GO:0016020,GO:0065007,GO:0044093,GO:0016337,GO:0050794,GO:0051247,GO:0050789,GO:0065009,GO:0051246,GO:0052547,GO:2000116,GO:0032270,GO:0043085,GO:0032268,GO:0048471,GO:0052548,GO:…	extracellular region part,extracellular region,vesicle,membrane-bounded vesicle,extracellular vesicular exosome,extracellular organelle,extracellular membrane-bounded organelle,positive regulation of biological process,single-organism process,single-organism cellular process,positive regulation of cellular process,cellular_component,protein binding,biological adhesion,cell adhesion,apoptotic proc…	ocu04810,ocu03013	Regulation of actin cytoskeleton,RNA transport
ENSOCUT00000023036	ENSOCUG00000000864	CADM1	1:101025368-101257087	88.133	13.3446	2.72343	5e-05	0.00164462	cell adhesion molecule 1 [Source:HGNC Symbol;Acc:HGNC:5951]	GO:0002376,GO:0006955,GO:0002682,GO:0044421,GO:0005576,GO:0002684,GO:0001816,GO:0006952,GO:0001817,GO:0051239,GO:0050896,GO:0031982,GO:0031988,GO:0006950,GO:0048584,GO:0050778,GO:0050776,GO:0070062,GO:0043230,GO:0065010,GO:0048518,GO:0044699,GO:0044763,GO:0048522,GO:0045087,GO:0048583,GO:0005575,GO:0005515,GO:0009306,GO:0031349,GO:0051179,GO:0032940,GO:0044707,GO:0032879,GO:0071944,GO:0032501,GO:…	immune system process,immune response,regulation of immune system process,extracellular region part,extracellular region,positive regulation of immune system process,cytokine production,defense response,regulation of cytokine production,regulation of multicellular organismal process,response to stimulus,vesicle,membrane-bounded vesicle,response to stress,positive regulation of response to stimulu…	ocu04514	Cell adhesion molecules (CAMs)
ENSOCUT00000005738	ENSOCUG00000005737	LGMN	20:13317332-13356241	405.364	91.2333	2.15158	5e-05	0.00164462	legumain [Source:HGNC Symbol;Acc:HGNC:9472]	GO:0044421,GO:0005576,GO:0051239,GO:0050896,GO:0031982,GO:0031988,GO:0070062,GO:0043230,GO:0065010,GO:0044699,GO:0044763,GO:0048583,GO:0005575,GO:0048519,GO:0044707,GO:0048523,GO:0032501,GO:0051716,GO:0043067,GO:0042981,GO:0006915,GO:0009966,GO:0012501,GO:0043066,GO:0005764,GO:0008219,GO:0016265,GO:0000323,GO:0043069,GO:0010941,GO:0023051,GO:0051241,GO:0010646,GO:0005773,GO:0060548,GO:0048585,GO:…	extracellular region part,extracellular region,regulation of multicellular organismal process,response to stimulus,vesicle,membrane-bounded vesicle,extracellular vesicular exosome,extracellular organelle,extracellular membrane-bounded organelle,single-organism process,single-organism cellular process,regulation of response to stimulus,cellular_component,negative regulation of biological process,s…	ocu04142,ocu04612	Lysosome,Antigen processing and presentation
ENSOCUT00000021897	ENSOCUG00000025898	CCDC64	21:12466363-12571615	0.50139	11.2709	-4.49052	5e-05	0.00164462	BICD family like cargo adaptor 1 [Source:HGNC Symbol;Acc:HGNC:28095]	GO:0048731,GO:0007275,GO:0044699,GO:0044767,GO:0048856,GO:0044763,GO:0032502,GO:0005575,GO:0005515,GO:0051179,GO:0030154,GO:0044707,GO:0032501,GO:0048869,GO:0005488,GO:0043228,GO:0043232,GO:0044765,GO:0005856,GO:0051234,GO:0044430,GO:0006810,GO:0051641,GO:0016043,GO:0051649,GO:0071840,GO:0005813,GO:0043226,GO:0008150,GO:0015630,GO:0019899,GO:0017137,GO:0005815,GO:0048666,GO:0005623,GO:0044464,GO:…	system development,multicellular organismal development,single-organism process,single-organism developmental process,anatomical structure development,single-organism cellular process,developmental process,cellular_component,protein binding,localization,cell differentiation,single-multicellular organism process,multicellular organismal process,cellular developmental process,binding,non-membrane-b…	--	--
ENSOCUT00000003342	ENSOCUG00000003344	IDO1	GL018706:2982636-2998642	4.65301	21.882	-2.23351	5e-05	0.00164462	indoleamine 2,3-dioxygenase 1 [Source:HGNC Symbol;Acc:HGNC:6059]	GO:0002376,GO:0006955,GO:0045321,GO:0001775,GO:0002682,GO:0002684,GO:0046649,GO:0050865,GO:0002694,GO:0002520,GO:0001816,GO:0042110,GO:0051249,GO:0006952,GO:0001817,GO:0051239,GO:0050896,GO:0002237,GO:0010033,GO:0050863,GO:0006950,GO:0048584,GO:0009617,GO:0048731,GO:0050778,GO:0050776,GO:0007275,GO:0006954,GO:0032496,GO:0048518,GO:0044699,GO:0046651,GO:0009611,GO:0032943,GO:0070661,GO:0051707,GO:…	immune system process,immune response,leukocyte activation,cell activation,regulation of immune system process,positive regulation of immune system process,lymphocyte activation,regulation of cell activation,regulation of leukocyte activation,immune system development,cytokine production,T cell activation,regulation of lymphocyte activation,defense response,regulation of cytokine production,regul…	ocu05143,ocu00380,ocu01100	African trypanosomiasis,Tryptophan metabolism,Metabolic pathways
ENSOCUT00000031413	ENSOCUG00000005439	CCNJL	3:41645359-41706227	0.45215	7.96792	-4.13933	5e-05	0.00164462	cyclin J like [Source:HGNC Symbol;Acc:HGNC:25876]	GO:0005575,GO:0043226,GO:0043227,GO:0005623,GO:0044464,GO:0044424,GO:0005622,GO:0043229,GO:0043231,GO:0005634	cellular_component,organelle,membrane-bounded organelle,cell,cell part,intracellular part,intracellular,intracellular organelle,intracellular membrane-bounded organelle,nucleus	--	--
ENSOCUT00000017749	ENSOCUG00000026794	-	AAGW02083071:5559-6080	3.23262	0	inf	5e-05	0.00164462	--	--	--	--	--
ENSOCUT00000010249	ENSOCUG00000010238	PIEZO2	9:51104104-51195059	13.2141	2.67694	2.30342	5e-05	0.00164462	piezo type mechanosensitive ion channel component 2 [Source:HGNC Symbol;Acc:HGNC:26270]	GO:0044699,GO:0044763,GO:0005575,GO:0051179,GO:0016020,GO:0016021,GO:0044765,GO:0031224,GO:0044425,GO:0051234,GO:0006810,GO:0008150,GO:0008381,GO:0022833,GO:0006811,GO:0009987,GO:0005215,GO:0003674,GO:0034220,GO:0022857,GO:0055085,GO:0022891,GO:0022892,GO:0015075,GO:0015267,GO:0022803,GO:0022836,GO:0022839,GO:0022838,GO:0005216	single-organism process,single-organism cellular process,cellular_component,localization,membrane,integral to membrane,single-organism transport,intrinsic to membrane,membrane part,establishment of localization,transport,biological_process,mechanically-gated ion channel activity,mechanically gated channel activity,ion transport,cellular process,transporter activity,molecular_function,ion transmem…	--	--
ENSOCUT00000010246	ENSOCUG00000010247	ATP6V0D2	3:101581451-101636320	110.942	1.25577	6.46508	5e-05	0.00164462	ATPase H+ transporting V0 subunit d2 [Source:HGNC Symbol;Acc:HGNC:18266]	GO:0044421,GO:0005576,GO:0031982,GO:0031988,GO:0044459,GO:0070062,GO:0043230,GO:0065010,GO:0044699,GO:0044763,GO:0005575,GO:0005515,GO:0051179,GO:0071944,GO:0005886,GO:0005488,GO:0005773,GO:0016020,GO:0044765,GO:0044425,GO:0051234,GO:0006810,GO:0043226,GO:0008150,GO:0043227,GO:0006811,GO:0005623,GO:0044464,GO:0045177,GO:0005737,GO:0033176,GO:0005768,GO:0009987,GO:0044437,GO:0016324,GO:0015992,GO:…	extracellular region part,extracellular region,vesicle,membrane-bounded vesicle,plasma membrane part,extracellular vesicular exosome,extracellular organelle,extracellular membrane-bounded organelle,single-organism process,single-organism cellular process,cellular_component,protein binding,localization,cell periphery,plasma membrane,binding,vacuole,membrane,single-organism transport,membrane part,…	ocu04142,ocu05323,ocu05152,ocu04145,ocu05203,ocu04721,ocu04966,ocu00190,ocu01100	Lysosome,Rheumatoid arthritis,Tuberculosis,Phagosome,Viral carcinogenesis,Synaptic vesicle cycle,Collecting duct acid secretion,Oxidative phosphorylation,Metabolic pathways
ENSOCUT00000010245	ENSOCUG00000010244	MMP14	17:43077646-43085394	221.087	30.3944	2.86274	5e-05	0.00164462	matrix metalloproteinase-14 precursor [Source:RefSeq peptide;Acc:NP_001076262]	GO:0002376,GO:0045321,GO:0001775,GO:0002682,GO:0002684,GO:0046649,GO:0002521,GO:0050865,GO:0002694,GO:0002520,GO:0030097,GO:0048534,GO:0051249,GO:0051239,GO:0030098,GO:0051251,GO:0050896,GO:0002696,GO:0050867,GO:0031982,GO:0048731,GO:0007275,GO:0048518,GO:0044699,GO:0048513,GO:0044767,GO:0048856,GO:0031012,GO:0040017,GO:0044763,GO:0051272,GO:0016477,GO:0048522,GO:0048583,GO:0030335,GO:0032502,GO:…	immune system process,leukocyte activation,cell activation,regulation of immune system process,positive regulation of immune system process,lymphocyte activation,leukocyte differentiation,regulation of cell activation,regulation of leukocyte activation,immune system development,hemopoiesis,hematopoietic or lymphoid organ development,regulation of lymphocyte activation,regulation of multicellular …	ocu04668,ocu04912	TNF signaling pathway,GnRH signaling pathway
ENSOCUT00000001676	ENSOCUG00000001677	CYB561A3	GL018717:3396848-3399932	94.8513	14.35	2.72462	5e-05	0.00164462	cytochrome b561 family member A3 [Source:HGNC Symbol;Acc:HGNC:23014]	GO:0005575,GO:0005764,GO:0000323,GO:0005488,GO:0005773,GO:0016020,GO:0016021,GO:0031224,GO:0044425,GO:0043226,GO:0008150,GO:0043227,GO:0005623,GO:0044464,GO:0005737,GO:0005768,GO:0044710,GO:0005770,GO:0044437,GO:0043167,GO:0005765,GO:0003674,GO:0005774,GO:0044424,GO:0044422,GO:0044446,GO:0005622,GO:0043229,GO:0046872,GO:0003824,GO:0031902,GO:0043169,GO:0043231,GO:0044444,GO:0055114,GO:0010008,GO:…	cellular_component,lysosome,lytic vacuole,binding,vacuole,membrane,integral to membrane,intrinsic to membrane,membrane part,organelle,biological_process,membrane-bounded organelle,cell,cell part,cytoplasm,endosome,single-organism metabolic process,late endosome,vacuolar part,ion binding,lysosomal membrane,molecular_function,vacuolar membrane,intracellular part,organelle part,intracellular organel…	--	--
ENSOCUT00000001679	ENSOCUG00000001676	EZH2	7:3127738-3202817	5.31267	24.744	-2.21957	5e-05	0.00164462	enhancer of zeste 2 polycomb repressive complex 2 subunit [Source:HGNC Symbol;Acc:HGNC:3527]	GO:0051239,GO:0050896,GO:0070887,GO:0010033,GO:0006950,GO:0048584,GO:0048731,GO:0007275,GO:0048518,GO:0044699,GO:0009611,GO:0048513,GO:0044767,GO:0000785,GO:0048856,GO:0044427,GO:0044763,GO:0048522,GO:0005694,GO:0048583,GO:0032502,GO:2000026,GO:0005575,GO:0008283,GO:0005515,GO:0042221,GO:0071310,GO:0048519,GO:0051179,GO:1901700,GO:0030154,GO:0042127,GO:0044707,GO:0048523,GO:0051094,GO:0032501,GO:…	regulation of multicellular organismal process,response to stimulus,cellular response to chemical stimulus,response to organic substance,response to stress,positive regulation of response to stimulus,system development,multicellular organismal development,positive regulation of biological process,single-organism process,response to wounding,organ development,single-organism developmental process,…	ocu05206	MicroRNAs in cancer
ENSOCUT00000005958	ENSOCUG00000005948	DMXL2	17:20907504-21083534	27.6654	7.38268	1.90587	5e-05	0.00164462	Dmx like 2 [Source:HGNC Symbol;Acc:HGNC:2938]	GO:0044421,GO:0005576,GO:0031982,GO:0031988,GO:0005615,GO:0005575,GO:0005515,GO:0005488,GO:0031410,GO:0016023,GO:0043226,GO:0030136,GO:0043227,GO:0019899,GO:0017137,GO:0005623,GO:0044464,GO:0005737,GO:0031267,GO:0017016,GO:0030135,GO:0051020,GO:0003674,GO:0008021,GO:0044456,GO:0044424,GO:0005622,GO:0045202,GO:0043229,GO:0043231,GO:0044444	extracellular region part,extracellular region,vesicle,membrane-bounded vesicle,extracellular space,cellular_component,protein binding,binding,cytoplasmic vesicle,cytoplasmic membrane-bounded vesicle,organelle,clathrin-coated vesicle,membrane-bounded organelle,enzyme binding,Rab GTPase binding,cell,cell part,cytoplasm,small GTPase binding,Ras GTPase binding,coated vesicle,GTPase binding,molecular…	--	--
ENSOCUT00000001098	ENSOCUG00000001098	DTHD1	2:25975467-26053757	0.523203	4.57354	-3.12787	5e-05	0.00164462	death domain containing 1 [Source:HGNC Symbol;Acc:HGNC:37261]	GO:0050896,GO:0044699,GO:0044763,GO:0051716,GO:0065007,GO:0050794,GO:0007165,GO:0050789,GO:0007154,GO:0044700,GO:0023052,GO:0008150,GO:0009987	response to stimulus,single-organism process,single-organism cellular process,cellular response to stimulus,biological regulation,regulation of cellular process,signal transduction,regulation of biological process,cell communication,single organism signaling,signaling,biological_process,cellular process	--	--
ENSOCUT00000027988	ENSOCUG00000022315	CEMIP	GL018737:1821099-1888687	7.49383	0.19425	5.26972	5e-05	0.00164462	cell migration inducing hyaluronan binding protein [Source:HGNC Symbol;Acc:HGNC:29213]	GO:0031982,GO:0031988,GO:0048518,GO:0044699,GO:0040017,GO:0044763,GO:0051272,GO:0016477,GO:0048522,GO:0030335,GO:0005575,GO:2000147,GO:0005515,GO:0040011,GO:0048870,GO:0051674,GO:0048519,GO:0051179,GO:0040012,GO:0030334,GO:0006928,GO:0044707,GO:2000145,GO:0032879,GO:0071944,GO:0051270,GO:0032501,GO:0005886,GO:0097367,GO:0006468,GO:0051223,GO:0032880,GO:0005488,GO:0051049,GO:0051050,GO:0005539,GO:…	vesicle,membrane-bounded vesicle,positive regulation of biological process,single-organism process,positive regulation of locomotion,single-organism cellular process,positive regulation of cellular component movement,cell migration,positive regulation of cellular process,positive regulation of cell migration,cellular_component,positive regulation of cell motility,protein binding,locomotion,cell m…	--	--
ENSOCUT00000014391	ENSOCUG00000014380	ABCA6	19:52928645-53000237	121.007	25.9405	2.22181	5e-05	0.00164462	ATP binding cassette subfamily A member 6 [Source:HGNC Symbol;Acc:HGNC:36]	GO:0005575,GO:0051179,GO:0005488,GO:0016020,GO:0016021,GO:0031224,GO:0044425,GO:0051234,GO:0006810,GO:0016787,GO:0008150,GO:0043168,GO:0032559,GO:0030554,GO:0005524,GO:0035639,GO:0032555,GO:0032550,GO:0001883,GO:0017076,GO:0032549,GO:0001882,GO:0032553,GO:0017111,GO:0043167,GO:0016462,GO:0005215,GO:0016818,GO:0003674,GO:0016817,GO:0016887,GO:0036094,GO:0003824,GO:0000166,GO:1901265,GO:1901363,GO:…	cellular_component,localization,binding,membrane,integral to membrane,intrinsic to membrane,membrane part,establishment of localization,transport,hydrolase activity,biological_process,anion binding,adenyl ribonucleotide binding,adenyl nucleotide binding,ATP binding,purine ribonucleoside triphosphate binding,purine ribonucleotide binding,purine ribonucleoside binding,purine nucleoside binding,puri…	ocu02010	ABC transporters
ENSOCUT00000000793	ENSOCUG00000000792	EPS8	8:23823678-23952629	72.3381	16.5861	2.12478	5e-05	0.00164462	epidermal growth factor receptor pathway substrate 8 [Source:HGNC Symbol;Acc:HGNC:3420]	GO:0002376,GO:0044421,GO:0005576,GO:0050896,GO:0010033,GO:0031982,GO:0031988,GO:0048584,GO:0044459,GO:0070062,GO:0043230,GO:0065010,GO:0048518,GO:0044699,GO:0044767,GO:0048856,GO:0044763,GO:0016477,GO:0048522,GO:0048583,GO:0032502,GO:0005575,GO:0005515,GO:0040011,GO:0042221,GO:0048870,GO:0051674,GO:0048519,GO:0051179,GO:0050900,GO:1901700,GO:0006928,GO:0044707,GO:0048523,GO:0071944,GO:0032501,GO:…	immune system process,extracellular region part,extracellular region,response to stimulus,response to organic substance,vesicle,membrane-bounded vesicle,positive regulation of response to stimulus,plasma membrane part,extracellular vesicular exosome,extracellular organelle,extracellular membrane-bounded organelle,positive regulation of biological process,single-organism process,single-organism de…	--	--
ENSOCUT00000024048	ENSOCUG00000024919	SLC29A2	GL019861:12255-18224	2.38189	9.84541	-2.04735	5e-05	0.00164462	solute carrier family 29 member 2 [Source:HGNC Symbol;Acc:HGNC:11004]	GO:0044459,GO:0044699,GO:0005575,GO:0051179,GO:0071944,GO:0005886,GO:0016020,GO:0016021,GO:0044765,GO:0031224,GO:0044425,GO:0051234,GO:0006810,GO:0071702,GO:1901264,GO:1901505,GO:0008150,GO:0005623,GO:0044464,GO:0016323,GO:0005337,GO:0005215,GO:0003674,GO:0015858,GO:0022857,GO:0071705,GO:0015932,GO:0022891,GO:0022892,GO:0015931	plasma membrane part,single-organism process,cellular_component,localization,cell periphery,plasma membrane,membrane,integral to membrane,single-organism transport,intrinsic to membrane,membrane part,establishment of localization,transport,organic substance transport,carbohydrate derivative transport,carbohydrate derivative transporter activity,biological_process,cell,cell part,basolateral plasma…	--	--
ENSOCUT00000002248	ENSOCUG00000002249	DHRS7	20:7750509-7765199	131.9	28.4362	2.21364	5e-05	0.00164462	dehydrogenase/reductase 7 [Source:HGNC Symbol;Acc:HGNC:21524]	GO:0005575,GO:0016020,GO:0008150,GO:0044710,GO:0003674,GO:0003824,GO:0055114,GO:0016491,GO:0008152	cellular_component,membrane,biological_process,single-organism metabolic process,molecular_function,catalytic activity,oxidation-reduction process,oxidoreductase activity,metabolic process	--	--
ENSOCUT00000021048	ENSOCUG00000026921	-	GL019314:87951-91169	402.717	118.166	1.76895	5e-05	0.00164462	--	--	--	--	--
ENSOCUT00000011270	ENSOCUG00000011270	-	13:34770520-34788107	1.28282	352.711	-8.10303	5e-05	0.00164462	T-cell surface glycoprotein CD1b precursor [Source:RefSeq peptide;Acc:NP_001082781]	GO:0002376,GO:0006955,GO:0050896,GO:0005575,GO:0016020,GO:0016021,GO:0031224,GO:0044425,GO:0008150	immune system process,immune response,response to stimulus,cellular_component,membrane,integral to membrane,intrinsic to membrane,membrane part,biological_process	ocu04640	Hematopoietic cell lineage
ENSOCUT00000007980	ENSOCUG00000007983	TNNC1	9:19523634-19526183	4.96096	70.4699	-3.82831	5e-05	0.00164462	Troponin C, slow skeletal and cardiac muscles [Source:UniProtKB/Swiss-Prot;Acc:P02591]	GO:0051239,GO:0050896,GO:0048731,GO:0007275,GO:0046983,GO:0044699,GO:0048513,GO:0044767,GO:0048856,GO:0044763,GO:0048583,GO:0032502,GO:0005575,GO:0005515,GO:0051179,GO:0006928,GO:0044707,GO:0032879,GO:0051270,GO:0032501,GO:0005509,GO:0005488,GO:0051049,GO:0060341,GO:0043228,GO:0043232,GO:0065007,GO:0050794,GO:0005856,GO:0050789,GO:0051234,GO:0065009,GO:0044430,GO:0009653,GO:0006810,GO:0042803,GO:…	regulation of multicellular organismal process,response to stimulus,system development,multicellular organismal development,protein dimerization activity,single-organism process,organ development,single-organism developmental process,anatomical structure development,single-organism cellular process,regulation of response to stimulus,developmental process,cellular_component,protein binding,localiz…	ocu05410,ocu05414,ocu04020,ocu04260,ocu04261	Hypertrophic cardiomyopathy (HCM),Dilated cardiomyopathy,Calcium signaling pathway,Cardiac muscle contraction,Adrenergic signaling in cardiomyocytes
ENSOCUT00000000612	ENSOCUG00000000611	FKBP10	19:42713268-42719450	94.9413	23.3966	2.02074	5e-05	0.00164462	FK506 binding protein 10 [Source:HGNC Symbol;Acc:HGNC:18169]	GO:0005515,GO:0005509,GO:0005488,GO:0008150,GO:0009987,GO:0043167,GO:0003674,GO:0019538,GO:0046872,GO:0043169,GO:0044267,GO:0044238,GO:0071704,GO:0043170,GO:0008152,GO:0006457,GO:0044237,GO:0044260	protein binding,calcium ion binding,binding,biological_process,cellular process,ion binding,molecular_function,protein metabolic process,metal ion binding,cation binding,cellular protein metabolic process,primary metabolic process,organic substance metabolic process,macromolecule metabolic process,metabolic process,protein folding,cellular metabolic process,cellular macromolecule metabolic process	--	--
ENSOCUT00000001759	ENSOCUG00000001759	CDCA7	7:113037948-113049844	0.639067	5.81802	-3.18649	5e-05	0.00164462	cell division cycle associated 7 [Source:HGNC Symbol;Acc:HGNC:14628]	GO:0044699,GO:0005575,GO:0008283,GO:0042127,GO:0065007,GO:0050794,GO:0050789,GO:0043226,GO:0008150,GO:0043227,GO:0005623,GO:0044464,GO:0005737,GO:0009987,GO:0044424,GO:0044422,GO:0044446,GO:0005622,GO:0043229,GO:0043231,GO:0005634,GO:0031981,GO:0031974,GO:0070013,GO:0043233,GO:0044428,GO:0005654	single-organism process,cellular_component,cell proliferation,regulation of cell proliferation,biological regulation,regulation of cellular process,regulation of biological process,organelle,biological_process,membrane-bounded organelle,cell,cell part,cytoplasm,cellular process,intracellular part,organelle part,intracellular organelle part,intracellular,intracellular organelle,intracellular membr…	--	--
ENSOCUT00000009398	ENSOCUG00000009397	STRBP	GL018699:3993290-4060809	5.22714	32.9739	-2.65723	5e-05	0.00164462	spermatid perinuclear RNA binding protein [Source:HGNC Symbol;Acc:HGNC:16462]	GO:0050896,GO:0044699,GO:0044767,GO:0048856,GO:0044763,GO:0032502,GO:0009605,GO:0005575,GO:0005515,GO:0030154,GO:0032501,GO:0048869,GO:0005488,GO:0043228,GO:0043232,GO:0005856,GO:0009888,GO:0009628,GO:0007610,GO:0043226,GO:0060429,GO:0008150,GO:0015630,GO:0043227,GO:0009612,GO:0005623,GO:0044464,GO:0009987,GO:0048468,GO:0048610,GO:0003674,GO:0044424,GO:0044708,GO:0030855,GO:0003727,GO:0003006,GO:…	response to stimulus,single-organism process,single-organism developmental process,anatomical structure development,single-organism cellular process,developmental process,response to external stimulus,cellular_component,protein binding,cell differentiation,multicellular organismal process,cellular developmental process,binding,non-membrane-bounded organelle,intracellular non-membrane-bounded orga…	--	--
ENSOCUT00000025184	ENSOCUG00000025413	CYTH4	GL018973:86455-108242	33.9137	6.83167	2.31156	5e-05	0.00164462	cytohesin 4 [Source:HGNC Symbol;Acc:HGNC:9505]	GO:0050896,GO:0044699,GO:0044763,GO:0048583,GO:0005575,GO:0071944,GO:0051716,GO:0005886,GO:0009966,GO:0023051,GO:0010646,GO:0016020,GO:0065007,GO:0050794,GO:0035556,GO:0007165,GO:0050789,GO:0007154,GO:0044700,GO:0023052,GO:0008150,GO:0005623,GO:0044464,GO:0009987,GO:0003674,GO:0007265,GO:0046578,GO:0005085,GO:0030234,GO:0051056,GO:0007264,GO:0005083,GO:0030695,GO:0060589,GO:0005086,GO:0032011,GO:…	response to stimulus,single-organism process,single-organism cellular process,regulation of response to stimulus,cellular_component,cell periphery,cellular response to stimulus,plasma membrane,regulation of signal transduction,regulation of signaling,regulation of cell communication,membrane,biological regulation,regulation of cellular process,intracellular signal transduction,signal transduction…	ocu04144	Endocytosis
ENSOCUT00000023175	ENSOCUG00000021035	HIST1H2BI	GL018747:658192-658573	45.906	1162.91	-4.66291	5e-05	0.00164462	--	GO:0000786,GO:0032993,GO:0046982,GO:0046983,GO:0000785,GO:0044427,GO:0005694,GO:0005575,GO:0005515,GO:0005488,GO:0043228,GO:0043232,GO:0003677,GO:0043226,GO:0043227,GO:0005623,GO:0044464,GO:0003674,GO:0044424,GO:0044422,GO:0044446,GO:0005622,GO:0032991,GO:0043229,GO:0043231,GO:0005634,GO:1901363,GO:0097159,GO:0003676	nucleosome,protein-DNA complex,protein heterodimerization activity,protein dimerization activity,chromatin,chromosomal part,chromosome,cellular_component,protein binding,binding,non-membrane-bounded organelle,intracellular non-membrane-bounded organelle,DNA binding,organelle,membrane-bounded organelle,cell,cell part,molecular_function,intracellular part,organelle part,intracellular organelle part…	ocu05322,ocu05034,ocu05203	Systemic lupus erythematosus,Alcoholism,Viral carcinogenesis
ENSOCUT00000005072	ENSOCUG00000005073	-	GL018809:604900-659177	2.9061	15.2124	-2.38809	5e-05	0.00164462	--	GO:0050896,GO:0010033,GO:0005515,GO:0042221,GO:0005488,GO:0016787,GO:0008233,GO:0035634,GO:0080184,GO:0070011,GO:0008150,GO:0006508,GO:0009987,GO:0019785,GO:0006464,GO:0036211,GO:0043412,GO:0003674,GO:1901575,GO:0008234,GO:0019538,GO:0009056,GO:0003824,GO:0014070,GO:0044248,GO:0044267,GO:0044257,GO:0044238,GO:0071704,GO:0051603,GO:0030163,GO:0009057,GO:0043170,GO:0016579,GO:0019783,GO:0070646,GO:…	response to stimulus,response to organic substance,protein binding,response to chemical stimulus,binding,hydrolase activity,peptidase activity,response to stilbenoid,response to phenylpropanoid,peptidase activity, acting on L-amino acid peptides,biological_process,proteolysis,cellular process,ISG15-specific protease activity,cellular protein modification process,protein modification process,macro…	--	--
ENSOCUT00000014901	ENSOCUG00000014903	RGCC	8:53600272-53611400	16.51	73.9125	-2.16248	5e-05	0.00164462	regulator of cell cycle [Source:HGNC Symbol;Acc:HGNC:20369]	GO:0002376,GO:0006955,GO:0001775,GO:0002682,GO:0002684,GO:0001816,GO:0001817,GO:0051239,GO:0050896,GO:0070887,GO:0006950,GO:0048584,GO:0048731,GO:0050778,GO:0050776,GO:0007275,GO:0048518,GO:0044699,GO:0048513,GO:0044767,GO:0048856,GO:0044763,GO:0016477,GO:0002253,GO:0048522,GO:0048583,GO:0032502,GO:2000026,GO:0005575,GO:0008283,GO:0005515,GO:0040011,GO:0009306,GO:0042221,GO:0048870,GO:0051674,GO:…	immune system process,immune response,cell activation,regulation of immune system process,positive regulation of immune system process,cytokine production,regulation of cytokine production,regulation of multicellular organismal process,response to stimulus,cellular response to chemical stimulus,response to stress,positive regulation of response to stimulus,system development,positive regulation o…	--	--
ENSOCUT00000015357	ENSOCUG00000015320	COL12A1	12:61958697-62083864	84.4808	13.8082	2.61309	5e-05	0.00164462	collagen type XII alpha 1 chain [Source:HGNC Symbol;Acc:HGNC:2188]	GO:0044421,GO:0005576,GO:0031982,GO:0031988,GO:0007275,GO:0070062,GO:0043230,GO:0065010,GO:0044699,GO:0005615,GO:0044767,GO:0048856,GO:0031012,GO:0044763,GO:0032502,GO:0005575,GO:0030154,GO:0044707,GO:0032501,GO:0048869,GO:0009653,GO:0035987,GO:0001706,GO:0007492,GO:0009888,GO:0048646,GO:0043226,GO:0008150,GO:0043227,GO:0001704,GO:0009987,GO:0009790,GO:0007369,GO:0048598	extracellular region part,extracellular region,vesicle,membrane-bounded vesicle,multicellular organismal development,extracellular vesicular exosome,extracellular organelle,extracellular membrane-bounded organelle,single-organism process,extracellular space,single-organism developmental process,anatomical structure development,extracellular matrix,single-organism cellular process,developmental pr…	ocu04974	Protein digestion and absorption
ENSOCUT00000017661	ENSOCUG00000017659	ANPEP	GL018738:1829889-1842909	7.00272	0.827524	3.08104	5e-05	0.00164462	alanyl aminopeptidase, membrane [Source:HGNC Symbol;Acc:HGNC:500]	GO:0044421,GO:0005576,GO:0009986,GO:0031982,GO:0031988,GO:0044459,GO:0070062,GO:0043230,GO:0065010,GO:0005615,GO:0009897,GO:0005575,GO:0071944,GO:0005886,GO:0005764,GO:0000323,GO:0005488,GO:0005773,GO:0016020,GO:0016021,GO:0031224,GO:0044425,GO:0016787,GO:0008233,GO:0070011,GO:0043226,GO:0008150,GO:0043227,GO:0008237,GO:0005623,GO:0044464,GO:0006508,GO:0005737,GO:0044437,GO:0043167,GO:0005765,GO:…	extracellular region part,extracellular region,cell surface,vesicle,membrane-bounded vesicle,plasma membrane part,extracellular vesicular exosome,extracellular organelle,extracellular membrane-bounded organelle,extracellular space,external side of plasma membrane,cellular_component,cell periphery,plasma membrane,lysosome,lytic vacuole,binding,vacuole,membrane,integral to membrane,intrinsic to mem…	ocu04640,ocu04614,ocu00480,ocu01100	Hematopoietic cell lineage,Renin-angiotensin system,Glutathione metabolism,Metabolic pathways
ENSOCUT00000002371	ENSOCUG00000002369	ITK	3:38647944-38715585	1.714	75.2017	-5.45533	5e-05	0.00164462	IL2 inducible T-cell kinase [Source:HGNC Symbol;Acc:HGNC:6171]	GO:0002376,GO:0006955,GO:0045321,GO:0001775,GO:0002682,GO:0002684,GO:0046649,GO:0002521,GO:0002520,GO:0001816,GO:0042110,GO:0030097,GO:0048534,GO:0030098,GO:0050896,GO:0048584,GO:0048731,GO:0050778,GO:0050776,GO:0007275,GO:0030217,GO:0048518,GO:0044699,GO:0002764,GO:0048513,GO:0044767,GO:0048856,GO:0002757,GO:0044763,GO:0002253,GO:0048583,GO:0032502,GO:0005575,GO:0005515,GO:0030154,GO:0044707,GO:…	immune system process,immune response,leukocyte activation,cell activation,regulation of immune system process,positive regulation of immune system process,lymphocyte activation,leukocyte differentiation,immune system development,cytokine production,T cell activation,hemopoiesis,hematopoietic or lymphoid organ development,lymphocyte differentiation,response to stimulus,positive regulation of resp…	ocu04660,ocu04062,ocu04670	T cell receptor signaling pathway,Chemokine signaling pathway,Leukocyte transendothelial migration
ENSOCUT00000016203	ENSOCUG00000016206	SDCBP	3:74042336-74064023	570.067	142.868	1.99645	5e-05	0.00164462	syndecan binding protein [Source:HGNC Symbol;Acc:HGNC:10662]	GO:0044421,GO:0005576,GO:0051239,GO:0046982,GO:0050896,GO:0070887,GO:0010033,GO:0031982,GO:0031988,GO:0048584,GO:0048731,GO:0044459,GO:0007275,GO:0046983,GO:0070062,GO:0043230,GO:0065010,GO:0048518,GO:0044699,GO:0048513,GO:0005615,GO:0044767,GO:0048856,GO:0040017,GO:0044763,GO:0051272,GO:0016477,GO:0048522,GO:0048583,GO:0030335,GO:0032502,GO:2000026,GO:0005575,GO:2000147,GO:0008283,GO:0005515,GO:…	extracellular region part,extracellular region,regulation of multicellular organismal process,protein heterodimerization activity,response to stimulus,cellular response to chemical stimulus,response to organic substance,vesicle,membrane-bounded vesicle,positive regulation of response to stimulus,system development,plasma membrane part,multicellular organismal development,protein dimerization acti…	--	--
ENSOCUT00000003770	ENSOCUG00000003763	PTPN22	13:50338598-50395878	2.78721	21.8268	-2.96921	5e-05	0.00164462	protein tyrosine phosphatase, non-receptor type 22 [Source:HGNC Symbol;Acc:HGNC:9652]	GO:0002376,GO:0006955,GO:0045321,GO:0001775,GO:0002682,GO:0002684,GO:0046649,GO:0002521,GO:0050865,GO:0002694,GO:0002520,GO:0001816,GO:0042110,GO:0030097,GO:0048534,GO:0051249,GO:0006952,GO:0001817,GO:0051239,GO:0030098,GO:0051251,GO:0050896,GO:0002696,GO:0070887,GO:0050867,GO:0010033,GO:0050870,GO:0050863,GO:0006950,GO:0048584,GO:0048731,GO:0050778,GO:0044459,GO:0050776,GO:0007275,GO:0030217,GO:…	immune system process,immune response,leukocyte activation,cell activation,regulation of immune system process,positive regulation of immune system process,lymphocyte activation,leukocyte differentiation,regulation of cell activation,regulation of leukocyte activation,immune system development,cytokine production,T cell activation,hemopoiesis,hematopoietic or lymphoid organ development,regulation…	--	--
ENSOCUT00000007479	ENSOCUG00000007482	CX3CL1	5:13525855-13537834	34.9612	4.35255	3.00582	5e-05	0.00164462	C-X3-C motif chemokine ligand 1 [Source:HGNC Symbol;Acc:HGNC:10647]	GO:0002376,GO:0006955,GO:0045321,GO:0001775,GO:0005576,GO:0001816,GO:0009986,GO:0006952,GO:0001817,GO:0051239,GO:0050896,GO:0070887,GO:0010033,GO:0006950,GO:0048584,GO:0048731,GO:0007275,GO:0006954,GO:0048518,GO:0044699,GO:0009611,GO:0060326,GO:0044767,GO:0034097,GO:0048856,GO:0044763,GO:0016477,GO:0048522,GO:0048583,GO:0032502,GO:0009605,GO:2000026,GO:0005575,GO:0005515,GO:0040011,GO:0042221,GO:…	immune system process,immune response,leukocyte activation,cell activation,extracellular region,cytokine production,cell surface,defense response,regulation of cytokine production,regulation of multicellular organismal process,response to stimulus,cellular response to chemical stimulus,response to organic substance,response to stress,positive regulation of response to stimulus,system development,…	ocu04060,ocu04062,ocu04668	Cytokine-cytokine receptor interaction,Chemokine signaling pathway,TNF signaling pathway
ENSOCUT00000007478	ENSOCUG00000007472	COL6A3	GL018840:384609-431258	360.177	66.6531	2.43396	5e-05	0.00164462	--	GO:0044421,GO:0005576,GO:0031982,GO:0031988,GO:0070062,GO:0043230,GO:0065010,GO:0005615,GO:0031012,GO:0005575,GO:0005578,GO:0071944,GO:0005886,GO:0044420,GO:0005581,GO:0016020,GO:0065007,GO:0050789,GO:0065009,GO:0052547,GO:0052548,GO:0050790,GO:0043226,GO:0008150,GO:0043227,GO:0010466,GO:0042383,GO:0044092,GO:0005623,GO:0010951,GO:0044464,GO:0051336,GO:0061134,GO:0051346,GO:0043086,GO:0004866,GO:…	extracellular region part,extracellular region,vesicle,membrane-bounded vesicle,extracellular vesicular exosome,extracellular organelle,extracellular membrane-bounded organelle,extracellular space,extracellular matrix,cellular_component,proteinaceous extracellular matrix,cell periphery,plasma membrane,extracellular matrix part,collagen,membrane,biological regulation,regulation of biological proce…	ocu04512,ocu04151,ocu04974,ocu04510	ECM-receptor interaction,PI3K-Akt signaling pathway,Protein digestion and absorption,Focal adhesion
ENSOCUT00000009886	ENSOCUG00000009869	LAMA3	9:64876398-65130179	3.33271	10.6321	-1.67366	5e-05	0.00164462	laminin subunit alpha 3 [Source:HGNC Symbol;Acc:HGNC:6483]	GO:0044421,GO:0005576,GO:0051239,GO:0031982,GO:0031988,GO:0007275,GO:0070062,GO:0043230,GO:0065010,GO:0044699,GO:0044767,GO:0048856,GO:0031012,GO:0044763,GO:0016477,GO:0032502,GO:2000026,GO:0005575,GO:0005515,GO:0040011,GO:0048870,GO:0051674,GO:0051179,GO:0040012,GO:0005578,GO:0030334,GO:0030154,GO:0006928,GO:0044707,GO:2000145,GO:0032879,GO:0051270,GO:0022610,GO:0032501,GO:0050793,GO:0007155,GO:…	extracellular region part,extracellular region,regulation of multicellular organismal process,vesicle,membrane-bounded vesicle,multicellular organismal development,extracellular vesicular exosome,extracellular organelle,extracellular membrane-bounded organelle,single-organism process,single-organism developmental process,anatomical structure development,extracellular matrix,single-organism cellul…	ocu05146,ocu04512,ocu04151,ocu05145,ocu04510,ocu05200,ocu05222	Amoebiasis,ECM-receptor interaction,PI3K-Akt signaling pathway,Toxoplasmosis,Focal adhesion,Pathways in cancer,Small cell lung cancer
ENSOCUT00000027280	ENSOCUG00000024296	BCL11B	GL018761:363052-432997	1.11693	47.7825	-5.41887	5e-05	0.00164462	B-cell CLL/lymphoma 11B [Source:HGNC Symbol;Acc:HGNC:13222]	GO:0002376,GO:0045321,GO:0001775,GO:0046649,GO:0002521,GO:0002520,GO:0042110,GO:0030097,GO:0048534,GO:0051239,GO:0030098,GO:0050896,GO:0048731,GO:0007275,GO:0030217,GO:0048518,GO:0044699,GO:0048513,GO:0044767,GO:0048856,GO:0044763,GO:0048522,GO:0032502,GO:0009605,GO:2000026,GO:0005575,GO:0008283,GO:0005515,GO:0040011,GO:0042221,GO:0006935,GO:0042330,GO:0048519,GO:0030154,GO:0006928,GO:0042127,GO:…	immune system process,leukocyte activation,cell activation,lymphocyte activation,leukocyte differentiation,immune system development,T cell activation,hemopoiesis,hematopoietic or lymphoid organ development,regulation of multicellular organismal process,lymphocyte differentiation,response to stimulus,system development,multicellular organismal development,T cell differentiation,positive regulatio…	--	--
ENSOCUT00000027750	ENSOCUG00000026741	CAMK4	GL018744:2126932-2141008	0.991762	31.0902	-4.97032	5e-05	0.00164462	--	GO:0002376,GO:0045321,GO:0001775,GO:0044421,GO:0005576,GO:0002521,GO:0002520,GO:0030097,GO:0048534,GO:0050896,GO:0031982,GO:0031988,GO:0048731,GO:0007275,GO:0070062,GO:0043230,GO:0065010,GO:0048518,GO:0044699,GO:0048513,GO:0044767,GO:0048856,GO:0044763,GO:0048522,GO:0032502,GO:0005575,GO:0030154,GO:0044707,GO:0032501,GO:0048869,GO:0030099,GO:0006468,GO:0002573,GO:0005488,GO:0002274,GO:0043228,GO:…	immune system process,leukocyte activation,cell activation,extracellular region part,extracellular region,leukocyte differentiation,immune system development,hemopoiesis,hematopoietic or lymphoid organ development,response to stimulus,vesicle,membrane-bounded vesicle,system development,multicellular organismal development,extracellular vesicular exosome,extracellular organelle,extracellular membr…	ocu05034,ocu04380,ocu05031,ocu04020,ocu04720,ocu04921,ocu04024,ocu04725,ocu04722	Alcoholism,Osteoclast differentiation,Amphetamine addiction,Calcium signaling pathway,Long-term potentiation,Oxytocin signaling pathway,cAMP signaling pathway,Cholinergic synapse,Neurotrophin signaling pathway
ENSOCUT00000014501	ENSOCUG00000014507	P2RY10	X:70621457-70622480	1.31	42.3865	-5.01597	5e-05	0.00164462	purinergic receptor P2Y10 [Source:HGNC Symbol;Acc:HGNC:19906]	GO:0050896,GO:0044699,GO:0044763,GO:0005575,GO:0051716,GO:0016020,GO:0065007,GO:0016021,GO:0031224,GO:0050794,GO:0007165,GO:0050789,GO:0044425,GO:0007154,GO:0044700,GO:0023052,GO:0007166,GO:0008150,GO:0009987,GO:0001614,GO:0016502,GO:0035586,GO:0003674,GO:0035590,GO:0004872,GO:0035589,GO:0001608,GO:0045028,GO:0004871,GO:0060089,GO:0035587,GO:0038023,GO:0035588,GO:0004888,GO:0007186,GO:0004930	response to stimulus,single-organism process,single-organism cellular process,cellular_component,cellular response to stimulus,membrane,biological regulation,integral to membrane,intrinsic to membrane,regulation of cellular process,signal transduction,regulation of biological process,membrane part,cell communication,single organism signaling,signaling,cell surface receptor signaling pathway,biolo…	ocu04080	Neuroactive ligand-receptor interaction
ENSOCUT00000013627	ENSOCUG00000013625	PRSS12	15:31393368-31466842	20.0036	4.96774	2.0096	5e-05	0.00164462	protease, serine 12 [Source:HGNC Symbol;Acc:HGNC:9477]	GO:0031982,GO:0044699,GO:0031012,GO:0044763,GO:0005575,GO:0051179,GO:0032940,GO:0071944,GO:0005886,GO:0046903,GO:0044420,GO:0016020,GO:0006897,GO:0044765,GO:0051234,GO:0006810,GO:0031410,GO:0038024,GO:0016787,GO:0004175,GO:0051641,GO:0008233,GO:0006898,GO:0017171,GO:0070011,GO:0051649,GO:0033267,GO:0005044,GO:0008236,GO:0043226,GO:0030424,GO:0008150,GO:0031638,GO:0006887,GO:0016485,GO:0016192,GO:…	vesicle,single-organism process,extracellular matrix,single-organism cellular process,cellular_component,localization,secretion by cell,cell periphery,plasma membrane,secretion,extracellular matrix part,membrane,endocytosis,single-organism transport,establishment of localization,transport,cytoplasmic vesicle,cargo receptor activity,hydrolase activity,endopeptidase activity,cellular localization,p…	--	--
ENSOCUT00000003926	ENSOCUG00000003928	SEPT6	X:68338513-68407181	29.7504	194.184	-2.70645	5e-05	0.00164462	septin 6 [Source:HGNC Symbol;Acc:HGNC:15848]	GO:0031982,GO:0031988,GO:0005575,GO:0005515,GO:0071944,GO:0005488,GO:0043228,GO:0043232,GO:0005856,GO:0044430,GO:0031410,GO:0016023,GO:0033267,GO:0043226,GO:0030424,GO:0043168,GO:0030136,GO:0043227,GO:0005623,GO:0044464,GO:0043679,GO:0043005,GO:0035639,GO:0032555,GO:0005737,GO:0032550,GO:0001883,GO:0017076,GO:0032549,GO:0001882,GO:0032553,GO:0030135,GO:0005940,GO:0032173,GO:0044306,GO:0043167,GO:…	vesicle,membrane-bounded vesicle,cellular_component,protein binding,cell periphery,binding,non-membrane-bounded organelle,intracellular non-membrane-bounded organelle,cytoskeleton,cytoskeletal part,cytoplasmic vesicle,cytoplasmic membrane-bounded vesicle,axon part,organelle,axon,anion binding,clathrin-coated vesicle,membrane-bounded organelle,cell,cell part,axon terminus,neuron projection,purine …	ocu05100	Bacterial invasion of epithelial cells
ENSOCUT00000003921	ENSOCUG00000003921	GLIPR1	4:54339760-54355906	196.113	32.8718	2.57676	5e-05	0.00164462	GLI pathogenesis related 1 [Source:HGNC Symbol;Acc:HGNC:17001]	GO:0005576,GO:0005575,GO:0016020,GO:0016021,GO:0031224,GO:0044425	extracellular region,cellular_component,membrane,integral to membrane,intrinsic to membrane,membrane part	--	--
ENSOCUT00000009312	ENSOCUG00000009311	CD84	13:32509230-32546932	79.5088	7.35298	3.43471	5e-05	0.00164462	CD84 molecule [Source:HGNC Symbol;Acc:HGNC:1704]	GO:0002376,GO:0006955,GO:0045321,GO:0001775,GO:0002682,GO:0044421,GO:0005576,GO:0002684,GO:0050865,GO:0002694,GO:0001816,GO:0001817,GO:0051239,GO:0050896,GO:0031982,GO:0031988,GO:0050776,GO:0070062,GO:0043230,GO:0065010,GO:0048518,GO:0044699,GO:0044763,GO:0048583,GO:0005575,GO:0005515,GO:0048519,GO:0051179,GO:0032940,GO:0044707,GO:0032879,GO:0048523,GO:0032501,GO:0002252,GO:0046903,GO:0050866,GO:…	immune system process,immune response,leukocyte activation,cell activation,regulation of immune system process,extracellular region part,extracellular region,positive regulation of immune system process,regulation of cell activation,regulation of leukocyte activation,cytokine production,regulation of cytokine production,regulation of multicellular organismal process,response to stimulus,vesicle,m…	--	--
ENSOCUT00000021127	ENSOCUG00000024969	FURIN	GL018738:1282692-1291324	61.3417	19.0004	1.69083	5e-05	0.00164462	furin, paired basic amino acid cleaving enzyme [Source:HGNC Symbol;Acc:HGNC:8568]	GO:0044421,GO:0005576,GO:0001816,GO:0009986,GO:0001817,GO:0051239,GO:0050896,GO:0031982,GO:0031988,GO:0070062,GO:0043230,GO:0065010,GO:0044699,GO:0044763,GO:0048583,GO:0005575,GO:0008283,GO:0005515,GO:0048519,GO:0051179,GO:0032940,GO:0044707,GO:0051704,GO:0048523,GO:0032501,GO:0051716,GO:0009966,GO:0046903,GO:0023051,GO:0005488,GO:0001818,GO:0051241,GO:0010646,GO:0016020,GO:0065007,GO:0044765,GO:…	extracellular region part,extracellular region,cytokine production,cell surface,regulation of cytokine production,regulation of multicellular organismal process,response to stimulus,vesicle,membrane-bounded vesicle,extracellular vesicular exosome,extracellular organelle,extracellular membrane-bounded organelle,single-organism process,single-organism cellular process,regulation of response to stim…	ocu05164	Influenza A
ENSOCUT00000014777	ENSOCUG00000014777	PADI2	GL019118:54686-95646	3.92579	0.621183	2.65989	5e-05	0.00164462	peptidyl arginine deiminase 2 [Source:HGNC Symbol;Acc:HGNC:18341]	GO:0002376,GO:0002682,GO:0044421,GO:0005576,GO:0050896,GO:0070887,GO:0010033,GO:0031982,GO:0031988,GO:0048731,GO:0007275,GO:0070062,GO:0043230,GO:0065010,GO:0048518,GO:0044699,GO:0048513,GO:0060326,GO:0044767,GO:0034097,GO:0000785,GO:0048856,GO:0044427,GO:0044763,GO:0016477,GO:0048522,GO:0005694,GO:0048583,GO:0032502,GO:0009605,GO:0005575,GO:0005515,GO:0040011,GO:0042221,GO:0071310,GO:0006935,GO:…	immune system process,regulation of immune system process,extracellular region part,extracellular region,response to stimulus,cellular response to chemical stimulus,response to organic substance,vesicle,membrane-bounded vesicle,system development,multicellular organismal development,extracellular vesicular exosome,extracellular organelle,extracellular membrane-bounded organelle,positive regulatio…	--	--
ENSOCUT00000007763	ENSOCUG00000007765	PSAT1	1:64697634-64728069	5.28711	85.0728	-4.00815	5e-05	0.00164462	phosphoserine aminotransferase [Source:RefSeq peptide;Acc:NP_001075740]	GO:0044421,GO:0005576,GO:0031982,GO:0031988,GO:0070062,GO:0043230,GO:0065010,GO:0005575,GO:0044283,GO:0044711,GO:0043226,GO:0008150,GO:0043227,GO:0005623,GO:0044464,GO:0016053,GO:0046394,GO:0005737,GO:0044710,GO:0009987,GO:0004648,GO:0003674,GO:0044424,GO:0006564,GO:0044281,GO:1901607,GO:0019752,GO:0043436,GO:0005622,GO:0006082,GO:1901564,GO:0008652,GO:0006563,GO:0003824,GO:1901605,GO:1901566,GO:…	extracellular region part,extracellular region,vesicle,membrane-bounded vesicle,extracellular vesicular exosome,extracellular organelle,extracellular membrane-bounded organelle,cellular_component,small molecule biosynthetic process,single-organism biosynthetic process,organelle,biological_process,membrane-bounded organelle,cell,cell part,organic acid biosynthetic process,carboxylic acid biosynthe…	ocu00750,ocu00260,ocu01230,ocu01200,ocu01100	Vitamin B6 metabolism,Glycine, serine and threonine metabolism,Biosynthesis of amino acids,Carbon metabolism,Metabolic pathways
ENSOCUT00000003685	ENSOCUG00000003688	CPPED1	6:5927691-5952560	51.3544	9.50736	2.43337	5e-05	0.00164462	calcineurin like phosphoesterase domain containing 1 [Source:HGNC Symbol;Acc:HGNC:25632]	GO:0044421,GO:0005576,GO:0031982,GO:0031988,GO:0070062,GO:0043230,GO:0065010,GO:0005575,GO:0071944,GO:0005886,GO:0016020,GO:0016787,GO:0043226,GO:0043227,GO:0005623,GO:0044464,GO:0005737,GO:0003674,GO:0044424,GO:0005622,GO:0003824	extracellular region part,extracellular region,vesicle,membrane-bounded vesicle,extracellular vesicular exosome,extracellular organelle,extracellular membrane-bounded organelle,cellular_component,cell periphery,plasma membrane,membrane,hydrolase activity,organelle,membrane-bounded organelle,cell,cell part,cytoplasm,molecular_function,intracellular part,intracellular,catalytic activity	--	--
ENSOCUT00000001355	ENSOCUG00000001355	IKZF3	19:41000049-41113425	1.88423	29.3211	-3.95989	5e-05	0.00164462	IKAROS family zinc finger 3 [Source:HGNC Symbol;Acc:HGNC:13178]	GO:0002376,GO:0045321,GO:0001775,GO:0002682,GO:0046649,GO:0002521,GO:0050865,GO:0002694,GO:0002520,GO:0030097,GO:0048534,GO:0051249,GO:0051239,GO:0046982,GO:0030098,GO:0048731,GO:0007275,GO:0046983,GO:0048518,GO:0044699,GO:0046651,GO:0032943,GO:0070661,GO:0048513,GO:0044767,GO:0048856,GO:0044763,GO:0048522,GO:0070663,GO:0032502,GO:2000026,GO:0005575,GO:0050670,GO:0008283,GO:0005515,GO:0032944,GO:…	immune system process,leukocyte activation,cell activation,regulation of immune system process,lymphocyte activation,leukocyte differentiation,regulation of cell activation,regulation of leukocyte activation,immune system development,hemopoiesis,hematopoietic or lymphoid organ development,regulation of lymphocyte activation,regulation of multicellular organismal process,protein heterodimerization…	--	--
ENSOCUT00000016321	ENSOCUG00000029538	FLVCR2	20:29506371-29567646	24.0601	3.12776	2.94344	5e-05	0.00164462	feline leukemia virus subgroup C cellular receptor family member 2 [Source:HGNC Symbol;Acc:HGNC:20105]	GO:0044699,GO:0044763,GO:0005575,GO:0051179,GO:0005488,GO:0016020,GO:0016021,GO:0044765,GO:0031224,GO:0044425,GO:0051234,GO:0006810,GO:0008150,GO:0051184,GO:0009987,GO:0015232,GO:0005215,GO:0003674,GO:0055085,GO:0046906,GO:0020037,GO:1901363,GO:0097159	single-organism process,single-organism cellular process,cellular_component,localization,binding,membrane,integral to membrane,single-organism transport,intrinsic to membrane,membrane part,establishment of localization,transport,biological_process,cofactor transporter activity,cellular process,heme transporter activity,transporter activity,molecular_function,transmembrane transport,tetrapyrrole b…	--	--
ENSOCUT00000011806	ENSOCUG00000000014	FTL	GL019028:86632-87941	4373.1	678.225	2.68882	5e-05	0.00164462	Oryctolagus cuniculus ferritin, light polypeptide (FTL), mRNA. [Source:RefSeq mRNA;Acc:NM_001101688]	GO:0044699,GO:0044763,GO:0005575,GO:0051179,GO:0005488,GO:0065007,GO:0044765,GO:0051234,GO:0006810,GO:0065008,GO:0008150,GO:0006811,GO:0005623,GO:0042592,GO:0006826,GO:0009987,GO:0008199,GO:0048878,GO:0043167,GO:0006873,GO:0003674,GO:0006875,GO:0050801,GO:0046916,GO:0055082,GO:0006879,GO:0030003,GO:0055076,GO:0000041,GO:0055072,GO:0055080,GO:0055065,GO:0030001,GO:0046872,GO:0019725,GO:0043169,GO:…	single-organism process,single-organism cellular process,cellular_component,localization,binding,biological regulation,single-organism transport,establishment of localization,transport,regulation of biological quality,biological_process,ion transport,cell,homeostatic process,iron ion transport,cellular process,ferric iron binding,chemical homeostasis,ion binding,cellular ion homeostasis,molecular…	ocu04978	Mineral absorption
ENSOCUT00000010672	ENSOCUG00000010671	SH2D2A	13:36145338-36153821	0.823071	8.21157	-3.31857	5e-05	0.00164462	SH2 domain containing 2A [Source:HGNC Symbol;Acc:HGNC:10821]	GO:0044699,GO:0008283,GO:0005515,GO:0005488,GO:0008150,GO:0003674	single-organism process,cell proliferation,protein binding,binding,biological_process,molecular_function	ocu04370	VEGF signaling pathway
ENSOCUT00000027420	ENSOCUG00000023548	-	GL018758:1375867-1376297	0	10.8099	#NAME?	5e-05	0.00164462	--	--	--	--	--
ENSOCUT00000000373	ENSOCUG00000000374	ADAMTS15	1:86179116-86204197	24.545	6.59893	1.89513	5e-05	0.00164462	ADAM metallopeptidase with thrombospondin type 1 motif 15 [Source:HGNC Symbol;Acc:HGNC:16305]	GO:0044421,GO:0005576,GO:0009986,GO:0005615,GO:0031012,GO:0005575,GO:0005578,GO:0097367,GO:0005488,GO:0005539,GO:0050840,GO:0008201,GO:0016787,GO:0004175,GO:0008233,GO:0070011,GO:0008150,GO:0043168,GO:0008237,GO:1901681,GO:0004222,GO:0005623,GO:0044464,GO:0006508,GO:0043167,GO:0003674,GO:0019538,GO:0046872,GO:0003824,GO:0043169,GO:0046914,GO:0008270,GO:0044238,GO:0071704,GO:0043170,GO:0008152	extracellular region part,extracellular region,cell surface,extracellular space,extracellular matrix,cellular_component,proteinaceous extracellular matrix,carbohydrate derivative binding,binding,glycosaminoglycan binding,extracellular matrix binding,heparin binding,hydrolase activity,endopeptidase activity,peptidase activity,peptidase activity, acting on L-amino acid peptides,biological_process,a…	--	--
ENSOCUT00000000762	ENSOCUG00000000763	PLA2G7	12:36055403-36075754	175.273	21.0805	3.05562	5e-05	0.00164462	phospholipase A2 group VII [Source:HGNC Symbol;Acc:HGNC:9040]	GO:0002376,GO:0002682,GO:0044421,GO:0005576,GO:0002684,GO:0050896,GO:0070887,GO:0048584,GO:0048518,GO:0044699,GO:0005615,GO:0060326,GO:0040017,GO:0044763,GO:0051272,GO:0016477,GO:0048522,GO:0048583,GO:0030335,GO:0009605,GO:0005575,GO:2000147,GO:0040011,GO:0042221,GO:0006935,GO:0042330,GO:0048870,GO:0051674,GO:0051179,GO:0050900,GO:0040012,GO:0030334,GO:0006928,GO:0044707,GO:2000145,GO:0032879,GO:…	immune system process,regulation of immune system process,extracellular region part,extracellular region,positive regulation of immune system process,response to stimulus,cellular response to chemical stimulus,positive regulation of response to stimulus,positive regulation of biological process,single-organism process,extracellular space,cell chemotaxis,positive regulation of locomotion,single-or…	ocu00565,ocu01100	Ether lipid metabolism,Metabolic pathways
ENSOCUT00000022354	ENSOCUG00000022040	-	GL019346:70470-73610	290.464	61.9157	2.22998	5e-05	0.00164462	--	GO:0004553,GO:0016787,GO:0016798,GO:0008150,GO:0004559,GO:0015923,GO:0003674,GO:0003824,GO:0005975,GO:0044238,GO:0071704,GO:0008152	hydrolase activity, hydrolyzing O-glycosyl compounds,hydrolase activity,hydrolase activity, acting on glycosyl bonds,biological_process,alpha-mannosidase activity,mannosidase activity,molecular_function,catalytic activity,carbohydrate metabolic process,primary metabolic process,organic substance metabolic process,metabolic process	ocu04142,ocu00511	Lysosome,Other glycan degradation
ENSOCUT00000014830	ENSOCUG00000014832	STEAP2	10:38390802-38404595	19.3482	4.74564	2.02753	5e-05	0.00164462	metalloreductase STEAP2 [Source:RefSeq peptide;Acc:NP_001164746]	GO:0050896,GO:0010033,GO:0031982,GO:0031988,GO:0044699,GO:0044763,GO:0005575,GO:0042221,GO:0051179,GO:0032940,GO:0071944,GO:0005886,GO:0046903,GO:0016020,GO:0016021,GO:0006897,GO:0044765,GO:0031224,GO:0044425,GO:0051234,GO:0009719,GO:0006810,GO:0031410,GO:0016023,GO:0051641,GO:0051649,GO:0043226,GO:0045055,GO:0008150,GO:0030136,GO:0043227,GO:0006887,GO:0016192,GO:0006811,GO:0034755,GO:0097286,GO:…	response to stimulus,response to organic substance,vesicle,membrane-bounded vesicle,single-organism process,single-organism cellular process,cellular_component,response to chemical stimulus,localization,secretion by cell,cell periphery,plasma membrane,secretion,membrane,integral to membrane,endocytosis,single-organism transport,intrinsic to membrane,membrane part,establishment of localization,res…	ocu04978	Mineral absorption
ENSOCUT00000007395	ENSOCUG00000007397	HIST1H1A	12:11033884-11034541	31.822	302.888	-3.25069	5e-05	0.00164462	histone cluster 1, H1a [Source:HGNC Symbol;Acc:HGNC:4715]	GO:0000786,GO:0032993,GO:0044699,GO:0000785,GO:0044427,GO:0044763,GO:0005694,GO:0005575,GO:0005515,GO:0032501,GO:0005488,GO:0043228,GO:0043232,GO:0003677,GO:0006323,GO:0071103,GO:0006259,GO:0016043,GO:0071840,GO:0006333,GO:0000228,GO:0031497,GO:0006334,GO:0043226,GO:0008150,GO:0044454,GO:0065004,GO:0043227,GO:0003682,GO:0034728,GO:0071824,GO:0051276,GO:0005623,GO:0044464,GO:0009987,GO:0043933,GO:…	nucleosome,protein-DNA complex,single-organism process,chromatin,chromosomal part,single-organism cellular process,chromosome,cellular_component,protein binding,multicellular organismal process,binding,non-membrane-bounded organelle,intracellular non-membrane-bounded organelle,DNA binding,DNA packaging,DNA conformation change,DNA metabolic process,cellular component organization,cellular componen…	--	--
ENSOCUT00000005826	ENSOCUG00000005824	-	14:19971172-20052346	305.319	43.9192	2.79739	5e-05	0.00164462	--	GO:0004553,GO:0016787,GO:0016798,GO:0008150,GO:0003674,GO:0004565,GO:0015925,GO:0003824,GO:0005975,GO:0044238,GO:0071704,GO:0008152	hydrolase activity, hydrolyzing O-glycosyl compounds,hydrolase activity,hydrolase activity, acting on glycosyl bonds,biological_process,molecular_function,beta-galactosidase activity,galactosidase activity,catalytic activity,carbohydrate metabolic process,primary metabolic process,organic substance metabolic process,metabolic process	ocu04142,ocu00531,ocu00511,ocu00604,ocu00600,ocu00052,ocu01100	Lysosome,Glycosaminoglycan degradation,Other glycan degradation,Glycosphingolipid biosynthesis - ganglio series,Sphingolipid metabolism,Galactose metabolism,Metabolic pathways
ENSOCUT00000000956	ENSOCUG00000000957	THRSP	1:138693910-138694363	23.1214	133.452	-2.52902	5e-05	0.00164462	thyroid hormone responsive [Source:HGNC Symbol;Acc:HGNC:11800]	GO:0046983,GO:0005575,GO:0005515,GO:0005488,GO:0065007,GO:0050794,GO:0050789,GO:0042803,GO:0019432,GO:0046460,GO:0046463,GO:0042802,GO:0006629,GO:0008610,GO:0006641,GO:0019216,GO:0046890,GO:0043226,GO:0008150,GO:0043227,GO:0006639,GO:0010866,GO:0006638,GO:0044255,GO:0005623,GO:0044464,GO:0005737,GO:0044710,GO:0009987,GO:0090207,GO:0080090,GO:0045017,GO:0019222,GO:0003674,GO:0031323,GO:0044424,GO:…	protein dimerization activity,cellular_component,protein binding,binding,biological regulation,regulation of cellular process,regulation of biological process,protein homodimerization activity,triglyceride biosynthetic process,neutral lipid biosynthetic process,acylglycerol biosynthetic process,identical protein binding,lipid metabolic process,lipid biosynthetic process,triglyceride metabolic pro…	--	--
ENSOCUT00000009322	ENSOCUG00000009319	PSIP1	1:38511455-38561241	32.7743	123.675	-1.91592	5e-05	0.00164462	PC4 and SFRS1 interacting protein 1 [Source:HGNC Symbol;Acc:HGNC:9527]	GO:0050896,GO:0006950,GO:0005575,GO:0005515,GO:0005488,GO:0016043,GO:0009628,GO:0071840,GO:0043226,GO:0008150,GO:0043227,GO:0005623,GO:0044464,GO:0009987,GO:0043933,GO:0006979,GO:0009408,GO:0003674,GO:0044424,GO:0065003,GO:0009266,GO:0044422,GO:0022607,GO:0044446,GO:0005622,GO:0000395,GO:0043229,GO:0034622,GO:0044085,GO:0045292,GO:0043231,GO:0005634,GO:0006376,GO:0044238,GO:0071704,GO:0000245,GO:…	response to stimulus,response to stress,cellular_component,protein binding,binding,cellular component organization,response to abiotic stimulus,cellular component organization or biogenesis,organelle,biological_process,membrane-bounded organelle,cell,cell part,cellular process,macromolecular complex subunit organization,response to oxidative stress,response to heat,molecular_function,intracellula…	--	--
ENSOCUT00000009326	ENSOCUG00000009322	MCOLN2	13:79903970-79976581	27.4256	1.59453	4.10432	5e-05	0.00164462	mucolipin 2 [Source:HGNC Symbol;Acc:HGNC:13357]	GO:0005575,GO:0016020,GO:0016021,GO:0031224,GO:0044425	cellular_component,membrane,integral to membrane,intrinsic to membrane,membrane part	--	--
ENSOCUT00000006138	ENSOCUG00000006137	CTSH	GL018746:337816-352409	405.571	92.6267	2.13046	5e-05	0.00164462	cathepsin H [Source:HGNC Symbol;Acc:HGNC:2535]	GO:0002376,GO:0006955,GO:0002682,GO:0044421,GO:0005576,GO:0051239,GO:0050896,GO:0070887,GO:0010033,GO:0031982,GO:0031988,GO:0048584,GO:0048731,GO:0050776,GO:0007275,GO:0070062,GO:0043230,GO:0065010,GO:0048518,GO:0044699,GO:0002764,GO:0048513,GO:0005615,GO:0044767,GO:0048856,GO:0040017,GO:0044763,GO:0051272,GO:0016477,GO:0048522,GO:0048583,GO:0030335,GO:0032502,GO:2000026,GO:0005575,GO:2000147,GO:…	immune system process,immune response,regulation of immune system process,extracellular region part,extracellular region,regulation of multicellular organismal process,response to stimulus,cellular response to chemical stimulus,response to organic substance,vesicle,membrane-bounded vesicle,positive regulation of response to stimulus,system development,regulation of immune response,multicellular o…	ocu04142	Lysosome
ENSOCUT00000029084	ENSOCUG00000026507	-	12:10829411-10829822	59.8838	347.864	-2.53829	5e-05	0.00164462	--	GO:0000786,GO:0032993,GO:0046982,GO:0046983,GO:0000785,GO:0044427,GO:0005694,GO:0005575,GO:0005515,GO:0005488,GO:0043228,GO:0043232,GO:0003677,GO:0043226,GO:0043227,GO:0005623,GO:0044464,GO:0003674,GO:0044424,GO:0044422,GO:0044446,GO:0005622,GO:0032991,GO:0043229,GO:0043231,GO:0005634,GO:1901363,GO:0097159,GO:0003676	nucleosome,protein-DNA complex,protein heterodimerization activity,protein dimerization activity,chromatin,chromosomal part,chromosome,cellular_component,protein binding,binding,non-membrane-bounded organelle,intracellular non-membrane-bounded organelle,DNA binding,organelle,membrane-bounded organelle,cell,cell part,molecular_function,intracellular part,organelle part,intracellular organelle part…	ocu05322,ocu05034,ocu05202	Systemic lupus erythematosus,Alcoholism,Transcriptional misregulation in cancer
ENSOCUT00000029555	ENSOCUG00000029309	-	GL018758:1536351-1536811	0	12.2994	#NAME?	5e-05	0.00164462	--	--	--	--	--
ENSOCUT00000017241	ENSOCUG00000017243	FAR2	8:11038453-11097122	2.95047	52.1407	-4.1434	5e-05	0.00164462	fatty acyl-CoA reductase 2 [Source:HGNC Symbol;Acc:HGNC:25531]	GO:0005575,GO:0016020,GO:0016021,GO:0031224,GO:0044425,GO:0043226,GO:0006793,GO:0008150,GO:0043227,GO:0005623,GO:0044464,GO:0005737,GO:0044710,GO:0009987,GO:0035336,GO:0035337,GO:0003674,GO:0050062,GO:0080019,GO:0044424,GO:0005622,GO:0043229,GO:0006637,GO:0035383,GO:0003824,GO:0043231,GO:0016620,GO:0051186,GO:0044444,GO:0005777,GO:0042579,GO:0006732,GO:0055114,GO:0016903,GO:0071704,GO:0016491,GO:…	cellular_component,membrane,integral to membrane,intrinsic to membrane,membrane part,organelle,phosphorus metabolic process,biological_process,membrane-bounded organelle,cell,cell part,cytoplasm,single-organism metabolic process,cellular process,long-chain fatty-acyl-CoA metabolic process,fatty-acyl-CoA metabolic process,molecular_function,long-chain-fatty-acyl-CoA reductase activity,fatty-acyl-C…	ocu04146	Peroxisome
ENSOCUT00000013890	ENSOCUG00000013891	-	4:48350421-48427343	70.9227	507.971	-2.84043	5e-05	0.00164462	--	GO:0004553,GO:0016787,GO:0016798,GO:0003796,GO:0003674,GO:0003824	hydrolase activity, hydrolyzing O-glycosyl compounds,hydrolase activity,hydrolase activity, acting on glycosyl bonds,lysozyme activity,molecular_function,catalytic activity	ocu04970	Salivary secretion
ENSOCUT00000000558	ENSOCUG00000000560	HEYL	13:126885591-126893820	7.07524	1.51216	2.22617	5e-05	0.00164462	hes related family bHLH transcription factor with YRPW motif-like [Source:HGNC Symbol;Acc:HGNC:4882]	GO:0051239,GO:0046982,GO:0050896,GO:0070887,GO:0010033,GO:0048731,GO:0007275,GO:0046983,GO:0048518,GO:0044699,GO:0048513,GO:0044767,GO:0048856,GO:0044763,GO:0048522,GO:0048583,GO:0032502,GO:2000026,GO:0005575,GO:0005515,GO:0042221,GO:0071310,GO:0048519,GO:0030154,GO:0044707,GO:0048523,GO:0051094,GO:0032501,GO:0051716,GO:0050793,GO:0048869,GO:0009966,GO:0045597,GO:0023051,GO:0005488,GO:0010646,GO:…	regulation of multicellular organismal process,protein heterodimerization activity,response to stimulus,cellular response to chemical stimulus,response to organic substance,system development,multicellular organismal development,protein dimerization activity,positive regulation of biological process,single-organism process,organ development,single-organism developmental process,anatomical structu…	--	--
ENSOCUT00000008723	ENSOCUG00000008724	ERCC6L	X:50909755-50913756	1.51865	7.59667	-2.32258	5e-05	0.00164462	ERCC excision repair 6 like, spindle assembly checkpoint helicase [Source:HGNC Symbol;Acc:HGNC:20794]	GO:0005575,GO:0005515,GO:0071944,GO:0005886,GO:0005488,GO:0016020,GO:0043228,GO:0043232,GO:0005856,GO:0044430,GO:0005813,GO:0043226,GO:0043168,GO:0015630,GO:0043227,GO:0032559,GO:0030554,GO:0005524,GO:0005815,GO:0005623,GO:0044464,GO:0035639,GO:0032555,GO:0005737,GO:0032550,GO:0001883,GO:0017076,GO:0032549,GO:0001882,GO:0032553,GO:0043167,GO:0003674,GO:0044424,GO:0044422,GO:0044446,GO:0005622,GO:…	cellular_component,protein binding,cell periphery,plasma membrane,binding,membrane,non-membrane-bounded organelle,intracellular non-membrane-bounded organelle,cytoskeleton,cytoskeletal part,centrosome,organelle,anion binding,microtubule cytoskeleton,membrane-bounded organelle,adenyl ribonucleotide binding,adenyl nucleotide binding,ATP binding,microtubule organizing center,cell,cell part,purine ri…	--	--
ENSOCUT00000009457	ENSOCUG00000009455	FRRS1	13:64367376-64424093	11.9459	1.9653	2.60369	5e-05	0.00164462	ferric chelate reductase 1 [Source:HGNC Symbol;Acc:HGNC:27622]	GO:0005575,GO:0016020,GO:0016021,GO:0031224,GO:0044425,GO:0008150,GO:0044710,GO:0055114,GO:0008152	cellular_component,membrane,integral to membrane,intrinsic to membrane,membrane part,biological_process,single-organism metabolic process,oxidation-reduction process,metabolic process	--	--
ENSOCUT00000028937	ENSOCUG00000022014	NOTCH3	GL018829:703870-728340	30.2194	6.02487	2.32647	5e-05	0.00164462	notch 3 [Source:HGNC Symbol;Acc:HGNC:7883]	GO:0051239,GO:0050896,GO:0048731,GO:0007275,GO:0048518,GO:0044699,GO:0048513,GO:0044767,GO:0048856,GO:0044763,GO:0048522,GO:0032502,GO:2000026,GO:0005575,GO:0008283,GO:0005515,GO:0048519,GO:0030154,GO:0042127,GO:0044707,GO:0048523,GO:0071944,GO:0032501,GO:0051716,GO:0050793,GO:0005886,GO:0048869,GO:0008284,GO:0005509,GO:0005488,GO:0016020,GO:0043228,GO:0043232,GO:0065007,GO:0016021,GO:0031224,GO:…	regulation of multicellular organismal process,response to stimulus,system development,multicellular organismal development,positive regulation of biological process,single-organism process,organ development,single-organism developmental process,anatomical structure development,single-organism cellular process,positive regulation of cellular process,developmental process,regulation of multicellul…	ocu05206,ocu04320,ocu04330,ocu04919	MicroRNAs in cancer,Dorso-ventral axis formation,Notch signaling pathway,Thyroid hormone signaling pathway
ENSOCUT00000012926	ENSOCUG00000012928	ENPP4	12:35356000-35394033	9.92315	39.2288	-1.98304	5e-05	0.00164462	ectonucleotide pyrophosphatase/phosphodiesterase 4 (putative) [Source:HGNC Symbol;Acc:HGNC:3359]	GO:0044421,GO:0005576,GO:0051239,GO:0050896,GO:0031982,GO:0031988,GO:0006950,GO:0070062,GO:0043230,GO:0065010,GO:0048518,GO:0044699,GO:0009611,GO:0048583,GO:0009605,GO:0005575,GO:0044707,GO:0032501,GO:0032101,GO:0051240,GO:0080134,GO:0016020,GO:0065007,GO:0016021,GO:0031224,GO:0050789,GO:0044425,GO:0042060,GO:0061041,GO:0030193,GO:1900046,GO:0016787,GO:0050818,GO:0065008,GO:0007596,GO:0007599,GO:…	extracellular region part,extracellular region,regulation of multicellular organismal process,response to stimulus,vesicle,membrane-bounded vesicle,response to stress,extracellular vesicular exosome,extracellular organelle,extracellular membrane-bounded organelle,positive regulation of biological process,single-organism process,response to wounding,regulation of response to stimulus,response to e…	ocu00230	Purine metabolism
ENSOCUT00000017684	ENSOCUG00000017684	SLA	3:148695181-148867495	5.79037	91.4573	-3.98137	5e-05	0.00164462	Src-like-adaptor [Source:HGNC Symbol;Acc:HGNC:10902]	GO:0005515,GO:0005488,GO:0003674	protein binding,binding,molecular_function	--	--
ENSOCUT00000006875	ENSOCUG00000006872	EMILIN1	2:158973676-158980409	77.765	21.5606	1.85073	5e-05	0.00164462	elastin microfibril interfacer 1 [Source:HGNC Symbol;Acc:HGNC:19880]	GO:0044421,GO:0005576,GO:0048518,GO:0044699,GO:0031012,GO:0044763,GO:0048522,GO:0005575,GO:0005515,GO:0005578,GO:0022610,GO:0007155,GO:0044420,GO:0005581,GO:0005488,GO:0065007,GO:0030155,GO:0050794,GO:0050789,GO:0005201,GO:0030198,GO:0043062,GO:0016043,GO:0042802,GO:0071840,GO:0031589,GO:0008150,GO:0045785,GO:0009987,GO:0030023,GO:0097493,GO:0003674,GO:0010810,GO:0010811,GO:0005198	extracellular region part,extracellular region,positive regulation of biological process,single-organism process,extracellular matrix,single-organism cellular process,positive regulation of cellular process,cellular_component,protein binding,proteinaceous extracellular matrix,biological adhesion,cell adhesion,extracellular matrix part,collagen,binding,biological regulation,regulation of cell adhe…	--	--
ENSOCUT00000010433	ENSOCUG00000010436	LEF1	15:41363489-41501219	4.57734	74.1749	-4.01835	5e-05	0.00164462	lymphoid enhancer binding factor 1 [Source:HGNC Symbol;Acc:HGNC:6551]	GO:0002376,GO:0006955,GO:0045321,GO:0001775,GO:0032993,GO:0002682,GO:0046649,GO:0002521,GO:0002520,GO:0001816,GO:0042110,GO:0030097,GO:0048534,GO:0001817,GO:0051239,GO:0030098,GO:0050896,GO:0070887,GO:0010033,GO:0048731,GO:0007275,GO:0030217,GO:0048518,GO:0044699,GO:0046651,GO:0032943,GO:0070661,GO:0048513,GO:0060326,GO:0044767,GO:0034097,GO:0048856,GO:0040017,GO:0044763,GO:0051272,GO:0016477,GO:…	immune system process,immune response,leukocyte activation,cell activation,protein-DNA complex,regulation of immune system process,lymphocyte activation,leukocyte differentiation,immune system development,cytokine production,T cell activation,hemopoiesis,hematopoietic or lymphoid organ development,regulation of cytokine production,regulation of multicellular organismal process,lymphocyte differen…	ocu05412,ocu05200,ocu05216,ocu04520,ocu05215,ocu05213,ocu05217,ocu04916,ocu05221,ocu04310,ocu05210,ocu04390	Arrhythmogenic right ventricular cardiomyopathy (ARVC),Pathways in cancer,Thyroid cancer,Adherens junction,Prostate cancer,Endometrial cancer,Basal cell carcinoma,Melanogenesis,Acute myeloid leukemia,Wnt signaling pathway,Colorectal cancer,Hippo signaling pathway
ENSOCUT00000002233	ENSOCUG00000002231	VLDLR	1:51852055-51887742	39.1114	10.972	1.83377	5e-05	0.00164462	Very low-density lipoprotein receptor [Source:UniProtKB/Swiss-Prot;Acc:P35953]	GO:0044421,GO:0005576,GO:0051239,GO:0050896,GO:0048731,GO:0007275,GO:0048518,GO:0044699,GO:0005615,GO:0044767,GO:0048856,GO:0044763,GO:0048522,GO:0032502,GO:2000026,GO:0005575,GO:0005515,GO:0048519,GO:0051179,GO:0030154,GO:0044707,GO:0048523,GO:0051094,GO:0032501,GO:0051716,GO:0050793,GO:0048869,GO:0006468,GO:0005509,GO:0005488,GO:0016020,GO:0065007,GO:0044093,GO:0016021,GO:0006897,GO:0044765,GO:…	extracellular region part,extracellular region,regulation of multicellular organismal process,response to stimulus,system development,multicellular organismal development,positive regulation of biological process,single-organism process,extracellular space,single-organism developmental process,anatomical structure development,single-organism cellular process,positive regulation of cellular proces…	--	--
ENSOCUT00000022845	ENSOCUG00000026197	CTSD	GL019645:1378-9770	1138.31	77.7594	3.87173	5e-05	0.00164462	cathepsin D [Source:HGNC Symbol;Acc:HGNC:2529]	GO:0044421,GO:0005576,GO:0031982,GO:0031988,GO:0070062,GO:0043230,GO:0065010,GO:0005615,GO:0031012,GO:0005575,GO:0005515,GO:0005764,GO:0000323,GO:0005488,GO:0005773,GO:0016020,GO:0045121,GO:0044425,GO:0016787,GO:0004175,GO:0008233,GO:0070011,GO:0043226,GO:0008150,GO:0043227,GO:0005623,GO:0044464,GO:0006508,GO:0005737,GO:0003674,GO:0044424,GO:0019538,GO:0005622,GO:0043229,GO:0004190,GO:0070001,GO:…	extracellular region part,extracellular region,vesicle,membrane-bounded vesicle,extracellular vesicular exosome,extracellular organelle,extracellular membrane-bounded organelle,extracellular space,extracellular matrix,cellular_component,protein binding,lysosome,lytic vacuole,binding,vacuole,membrane,membrane raft,membrane part,hydrolase activity,endopeptidase activity,peptidase activity,peptidase…	ocu04142,ocu05152,ocu04071	Lysosome,Tuberculosis,Sphingolipid signaling pathway
ENSOCUT00000007310	ENSOCUG00000007309	IKZF2	7:154246314-154467576	4.07051	100.51	-4.62598	5e-05	0.00164462	IKAROS family zinc finger 2 [Source:HGNC Symbol;Acc:HGNC:13177]	GO:0046982,GO:0046983,GO:0048518,GO:0048522,GO:0005575,GO:0005515,GO:0005488,GO:0065007,GO:0050794,GO:0050789,GO:0042803,GO:0042802,GO:0009893,GO:0043226,GO:0008150,GO:0043227,GO:0031325,GO:0010604,GO:0005623,GO:0044464,GO:0009987,GO:0080090,GO:0043167,GO:0019222,GO:0003674,GO:0031323,GO:0044424,GO:0060255,GO:0005622,GO:0043229,GO:0009891,GO:0046872,GO:0031328,GO:0010557,GO:0043169,GO:0045944,GO:…	protein heterodimerization activity,protein dimerization activity,positive regulation of biological process,positive regulation of cellular process,cellular_component,protein binding,binding,biological regulation,regulation of cellular process,regulation of biological process,protein homodimerization activity,identical protein binding,positive regulation of metabolic process,organelle,biological_…	--	--
ENSOCUT00000005201	ENSOCUG00000005197	ABR	19:17449949-17541776	47.5752	13.4394	1.82374	5e-05	0.00164462	active BCR-related [Source:HGNC Symbol;Acc:HGNC:81]	GO:0002376,GO:0006955,GO:0045321,GO:0001775,GO:0002682,GO:0050865,GO:0002694,GO:0006952,GO:0051239,GO:0050896,GO:0002237,GO:0010033,GO:0006950,GO:0009617,GO:0048731,GO:0050776,GO:0007275,GO:0006954,GO:0032496,GO:0048518,GO:0044699,GO:0009611,GO:0048513,GO:0051707,GO:0044767,GO:0048856,GO:0009607,GO:0044763,GO:0016477,GO:0048583,GO:0032502,GO:0009605,GO:0005575,GO:0040011,GO:0042221,GO:0048870,GO:…	immune system process,immune response,leukocyte activation,cell activation,regulation of immune system process,regulation of cell activation,regulation of leukocyte activation,defense response,regulation of multicellular organismal process,response to stimulus,response to molecule of bacterial origin,response to organic substance,response to stress,response to bacterium,system development,regulat…	--	--
ENSOCUT00000005045	ENSOCUG00000005049	GPR174	X:70787901-70788903	0.911462	33.2245	-5.18792	5e-05	0.00164462	G protein-coupled receptor 174 [Source:HGNC Symbol;Acc:HGNC:30245]	GO:0002376,GO:0050896,GO:0044699,GO:0044763,GO:0005575,GO:0051716,GO:0016020,GO:0065007,GO:0016021,GO:0031224,GO:0050794,GO:0007165,GO:0050789,GO:0044425,GO:0048872,GO:0007154,GO:0044700,GO:0023052,GO:0007166,GO:0065008,GO:0045125,GO:0008150,GO:0002260,GO:0043029,GO:0001776,GO:0042592,GO:0009987,GO:0003674,GO:0004872,GO:0004871,GO:0060089,GO:0038023,GO:0004888,GO:0007186,GO:0004930	immune system process,response to stimulus,single-organism process,single-organism cellular process,cellular_component,cellular response to stimulus,membrane,biological regulation,integral to membrane,intrinsic to membrane,regulation of cellular process,signal transduction,regulation of biological process,membrane part,homeostasis of number of cells,cell communication,single organism signaling,si…	--	--
ENSOCUT00000005599	ENSOCUG00000022539	-	GL018910:18719-32041	0.814684	50.6124	-5.9571	5e-05	0.00164462	--	GO:0005575,GO:0016020,GO:0016021,GO:0031224,GO:0044425	cellular_component,membrane,integral to membrane,intrinsic to membrane,membrane part	ocu04640,ocu04060,ocu04151,ocu05162,ocu05166,ocu04630,ocu04144	Hematopoietic cell lineage,Cytokine-cytokine receptor interaction,PI3K-Akt signaling pathway,Measles,HTLV-I infection,Jak-STAT signaling pathway,Endocytosis
ENSOCUT00000005597	ENSOCUG00000005603	TESPA1	4:38501218-38546255	0.387041	18.0609	-5.54424	5e-05	0.00164462	thymocyte expressed, positive selection associated 1 [Source:HGNC Symbol;Acc:HGNC:29109]	GO:0002376,GO:0006955,GO:0045321,GO:0001775,GO:0002682,GO:0002684,GO:0046649,GO:0002521,GO:0050865,GO:0002694,GO:0002520,GO:0042110,GO:0030097,GO:0048534,GO:0051249,GO:0051239,GO:0030098,GO:0051251,GO:0050896,GO:0002696,GO:0050867,GO:0050870,GO:0050863,GO:0048584,GO:0048731,GO:0050778,GO:0050776,GO:0007275,GO:0030217,GO:0048518,GO:0044699,GO:0002764,GO:0048513,GO:0044767,GO:0048856,GO:0002757,GO:…	immune system process,immune response,leukocyte activation,cell activation,regulation of immune system process,positive regulation of immune system process,lymphocyte activation,leukocyte differentiation,regulation of cell activation,regulation of leukocyte activation,immune system development,T cell activation,hemopoiesis,hematopoietic or lymphoid organ development,regulation of lymphocyte activ…	--	--
ENSOCUT00000015623	ENSOCUG00000015627	ZFP57	12:21999293-22033322	1.49762	21.8727	-3.86839	5e-05	0.00164462	ZFP57 zinc finger protein [Source:HGNC Symbol;Acc:HGNC:18791]	GO:0007275,GO:0044699,GO:0044767,GO:0000785,GO:0048856,GO:0044427,GO:0005694,GO:0032502,GO:0005575,GO:0005515,GO:0048519,GO:0044707,GO:0048523,GO:0032501,GO:0005488,GO:0016020,GO:0043228,GO:0043232,GO:0065007,GO:0016021,GO:0031224,GO:0050794,GO:0050789,GO:0044425,GO:0003677,GO:0006259,GO:0000228,GO:0043226,GO:0009892,GO:0008150,GO:0044454,GO:0043227,GO:0010605,GO:0031324,GO:0005623,GO:0044464,GO:…	multicellular organismal development,single-organism process,single-organism developmental process,chromatin,anatomical structure development,chromosomal part,chromosome,developmental process,cellular_component,protein binding,negative regulation of biological process,single-multicellular organism process,negative regulation of cellular process,multicellular organismal process,binding,membrane,no…	--	--
ENSOCUT00000006767	ENSOCUG00000006768	FAM78A	GL018764:172879-186093	11.7464	97.99	-3.06042	5e-05	0.00164462	family with sequence similarity 78 member A [Source:HGNC Symbol;Acc:HGNC:25465]	--	--	--	--
ENSOCUT00000014102	ENSOCUG00000014100	-	GL018776:614926-630334	21.9878	4.51613	2.28354	5e-05	0.00164462	--	GO:0005488,GO:0030246,GO:0004553,GO:0016787,GO:0016798,GO:0008150,GO:0006013,GO:0004559,GO:0015923,GO:0019318,GO:0005996,GO:0043167,GO:0003674,GO:0046872,GO:0003824,GO:0005975,GO:0043169,GO:0044723,GO:0046914,GO:0008270,GO:0044238,GO:0071704,GO:0008152	binding,carbohydrate binding,hydrolase activity, hydrolyzing O-glycosyl compounds,hydrolase activity,hydrolase activity, acting on glycosyl bonds,biological_process,mannose metabolic process,alpha-mannosidase activity,mannosidase activity,hexose metabolic process,monosaccharide metabolic process,ion binding,molecular_function,metal ion binding,catalytic activity,carbohydrate metabolic process,cat…	ocu04142,ocu00511	Lysosome,Other glycan degradation
ENSOCUT00000025428	ENSOCUG00000014197	MSR1	2:69694403-69778852	42.9018	6.16676	2.79846	5e-05	0.00164462	macrophage scavenger receptor types I and II [Source:RefSeq peptide;Acc:NP_001075717]	GO:0048518,GO:0044699,GO:0044763,GO:0048522,GO:0032502,GO:0005575,GO:0005515,GO:0051179,GO:0030154,GO:0044707,GO:0032879,GO:0051094,GO:0032501,GO:0050793,GO:0048869,GO:0045597,GO:0005488,GO:0016020,GO:0065007,GO:0016021,GO:0006897,GO:0044765,GO:0031224,GO:0010876,GO:0050794,GO:0019915,GO:0045595,GO:0050789,GO:0044425,GO:0051234,GO:0006810,GO:0006869,GO:0097006,GO:0071702,GO:0038024,GO:0033036,GO:…	positive regulation of biological process,single-organism process,single-organism cellular process,positive regulation of cellular process,developmental process,cellular_component,protein binding,localization,cell differentiation,single-multicellular organism process,regulation of localization,positive regulation of developmental process,multicellular organismal process,regulation of developmenta…	ocu04145	Phagosome
ENSOCUT00000002920	ENSOCUG00000002924	LGALS3	17:73821808-73873727	272.817	32.2979	3.07842	5e-05	0.00164462	Galectin-3 [Source:UniProtKB/Swiss-Prot;Acc:P47845]	GO:0002376,GO:0006955,GO:0045321,GO:0001775,GO:0002682,GO:0044421,GO:0005576,GO:0002684,GO:0046649,GO:0050865,GO:0002694,GO:0042110,GO:0051249,GO:0006952,GO:0050896,GO:0070887,GO:0050863,GO:0031982,GO:0031988,GO:0006950,GO:0044459,GO:0070062,GO:0043230,GO:0065010,GO:0048518,GO:0044699,GO:0046651,GO:0032943,GO:0070661,GO:0005615,GO:0060326,GO:0048856,GO:0031012,GO:0040017,GO:0044763,GO:0051272,GO:…	immune system process,immune response,leukocyte activation,cell activation,regulation of immune system process,extracellular region part,extracellular region,positive regulation of immune system process,lymphocyte activation,regulation of cell activation,regulation of leukocyte activation,T cell activation,regulation of lymphocyte activation,defense response,response to stimulus,cellular response…	--	--
ENSOCUT00000007401	ENSOCUG00000026955	-	GL018747:705741-706410	0	49.5167	#NAME?	5e-05	0.00164462	histone cluster 1, H2ah [Source:HGNC Symbol;Acc:HGNC:13671]	GO:0000786,GO:0032993,GO:0044421,GO:0005576,GO:0046982,GO:0031982,GO:0031988,GO:0046983,GO:0070062,GO:0043230,GO:0065010,GO:0000785,GO:0044427,GO:0005694,GO:0005575,GO:0005515,GO:0005488,GO:0043228,GO:0043232,GO:0003677,GO:0043226,GO:0043227,GO:0005623,GO:0044464,GO:0003674,GO:0044424,GO:0044422,GO:0044446,GO:0005622,GO:0032991,GO:0043229,GO:0043231,GO:0005634,GO:1901363,GO:0097159,GO:0003676	nucleosome,protein-DNA complex,extracellular region part,extracellular region,protein heterodimerization activity,vesicle,membrane-bounded vesicle,protein dimerization activity,extracellular vesicular exosome,extracellular organelle,extracellular membrane-bounded organelle,chromatin,chromosomal part,chromosome,cellular_component,protein binding,binding,non-membrane-bounded organelle,intracellular…	ocu05322,ocu05034	Systemic lupus erythematosus,Alcoholism
ENSOCUT00000003898	ENSOCUG00000003897	PRIMPOL	2:61930255-62029027	7.1157	49.3476	-2.7939	5e-05	0.00164462	primase and DNA directed polymerase [Source:HGNC Symbol;Acc:HGNC:26575]	GO:0050896,GO:0006950,GO:0044699,GO:0044763,GO:0005575,GO:0005515,GO:0051716,GO:0005488,GO:0006259,GO:0016043,GO:0006261,GO:0009628,GO:0071840,GO:0006260,GO:0043226,GO:0008150,GO:0043227,GO:0003682,GO:0005623,GO:0044464,GO:0005737,GO:0009987,GO:0033554,GO:0003887,GO:0006264,GO:0003674,GO:0016772,GO:0009314,GO:0071897,GO:0034061,GO:0044424,GO:0006974,GO:0032042,GO:0006301,GO:0006269,GO:0006996,GO:…	response to stimulus,response to stress,single-organism process,single-organism cellular process,cellular_component,protein binding,cellular response to stimulus,binding,DNA metabolic process,cellular component organization,DNA-dependent DNA replication,response to abiotic stimulus,cellular component organization or biogenesis,DNA replication,organelle,biological_process,membrane-bounded organell…	--	--
ENSOCUT00000020944	ENSOCUG00000014258	TRAC	17:42820613-42828902	4.56713	129.464	-4.82512	5e-05	0.00164462	T-cell receptor alpha constant [Source:HGNC Symbol;Acc:HGNC:12029]	--	--	--	--
ENSOCUT00000017085	ENSOCUG00000009828	ARPP21	14:22569928-22684866	0.134802	57.3165	-8.73197	5e-05	0.00164462	cAMP regulated phosphoprotein 21 [Source:HGNC Symbol;Acc:HGNC:16968]	GO:0050896,GO:0006950,GO:0044699,GO:0044763,GO:0051716,GO:0005488,GO:0009628,GO:0008150,GO:0009987,GO:0033554,GO:0009408,GO:0003674,GO:0009266,GO:0034605,GO:1901363,GO:0097159,GO:0003676	response to stimulus,response to stress,single-organism process,single-organism cellular process,cellular response to stimulus,binding,response to abiotic stimulus,biological_process,cellular process,cellular response to stress,response to heat,molecular_function,response to temperature stimulus,cellular response to heat,heterocyclic compound binding,organic cyclic compound binding,nucleic acid b…	--	--
ENSOCUT00000017336	ENSOCUG00000017338	EDIL3	11:4179975-4668948	21.179	3.32561	2.67094	5e-05	0.00164462	EGF like repeats and discoidin domains 3 [Source:HGNC Symbol;Acc:HGNC:3173]	GO:0044421,GO:0005576,GO:0031982,GO:0031988,GO:0070062,GO:0043230,GO:0065010,GO:0048518,GO:0044699,GO:0044763,GO:0048522,GO:0005575,GO:0005515,GO:0022610,GO:0007155,GO:0005102,GO:0005509,GO:0005488,GO:0005178,GO:0065007,GO:0030155,GO:0050794,GO:0050789,GO:0031589,GO:0043226,GO:0008150,GO:0043227,GO:0045785,GO:0032403,GO:0009987,GO:0043167,GO:0003674,GO:0010810,GO:0010811,GO:0046872,GO:0043169	extracellular region part,extracellular region,vesicle,membrane-bounded vesicle,extracellular vesicular exosome,extracellular organelle,extracellular membrane-bounded organelle,positive regulation of biological process,single-organism process,single-organism cellular process,positive regulation of cellular process,cellular_component,protein binding,biological adhesion,cell adhesion,receptor bindi…	--	--
ENSOCUT00000003911	ENSOCUG00000003911	CD40LG	X:111210868-111223327	0.903898	8.38079	-3.21285	5e-05	0.00164462	CD40 ligand [Source:HGNC Symbol;Acc:HGNC:11935]	GO:0002376,GO:0006955,GO:0045321,GO:0001775,GO:0002682,GO:0044421,GO:0005576,GO:0002684,GO:0046649,GO:0002521,GO:0050865,GO:0002694,GO:0002520,GO:0001816,GO:0042110,GO:0030097,GO:0048534,GO:0009986,GO:0051249,GO:0006952,GO:0001817,GO:0051239,GO:0030098,GO:0051251,GO:0050896,GO:0002696,GO:0050867,GO:0050870,GO:0050863,GO:0006950,GO:0048584,GO:0048731,GO:0044459,GO:0007275,GO:0006954,GO:0048518,GO:…	immune system process,immune response,leukocyte activation,cell activation,regulation of immune system process,extracellular region part,extracellular region,positive regulation of immune system process,lymphocyte activation,leukocyte differentiation,regulation of cell activation,regulation of leukocyte activation,immune system development,cytokine production,T cell activation,hemopoiesis,hematop…	ocu05322,ocu05340,ocu04060,ocu04514,ocu04672,ocu05144,ocu04660,ocu05330,ocu05320,ocu04064,ocu05310,ocu05416,ocu05145	Systemic lupus erythematosus,Primary immunodeficiency,Cytokine-cytokine receptor interaction,Cell adhesion molecules (CAMs),Intestinal immune network for IgA production,Malaria,T cell receptor signaling pathway,Allograft rejection,Autoimmune thyroid disease,NF-kappa B signaling pathway,Asthma,Viral myocarditis,Toxoplasmosis
ENSOCUT00000009076	ENSOCUG00000009077	MS4A2	1:192838347-192847761	0.931678	44.4418	-5.57594	5e-05	0.00164462	membrane spanning 4-domains A2 [Source:HGNC Symbol;Acc:HGNC:7316]	GO:0002376,GO:0006955,GO:0002682,GO:0009986,GO:0006952,GO:0050896,GO:0006950,GO:0044459,GO:0050776,GO:0006954,GO:0044699,GO:0009611,GO:0002764,GO:0044763,GO:0009897,GO:0048583,GO:0005575,GO:0005515,GO:0002768,GO:0071944,GO:0051716,GO:0005886,GO:0005488,GO:0016020,GO:0065007,GO:0016021,GO:0031224,GO:0050794,GO:0007165,GO:0050789,GO:0044425,GO:0007154,GO:0044700,GO:0023052,GO:0007166,GO:0031226,GO:…	immune system process,immune response,regulation of immune system process,cell surface,defense response,response to stimulus,response to stress,plasma membrane part,regulation of immune response,inflammatory response,single-organism process,response to wounding,immune response-regulating signaling pathway,single-organism cellular process,external side of plasma membrane,regulation of response to …	ocu05310,ocu04664,ocu04071	Asthma,Fc epsilon RI signaling pathway,Sphingolipid signaling pathway
ENSOCUT00000006985	ENSOCUG00000006989	RAG1	1:175828095-175831224	1.04873	863.254	-9.685	5e-05	0.00164462	recombination activating gene 1 [Source:HGNC Symbol;Acc:HGNC:9831]	GO:0002376,GO:0006955,GO:0045321,GO:0001775,GO:0002682,GO:0002684,GO:0046649,GO:0002521,GO:0050865,GO:0002694,GO:0002520,GO:0042110,GO:0030097,GO:0048534,GO:0051249,GO:0051239,GO:0030098,GO:0051251,GO:0050896,GO:0002696,GO:0050867,GO:0050870,GO:0050863,GO:0048731,GO:0007275,GO:0046983,GO:0030217,GO:0048518,GO:0044699,GO:0048513,GO:0044767,GO:0048856,GO:0044763,GO:0048522,GO:0032502,GO:2000026,GO:…	immune system process,immune response,leukocyte activation,cell activation,regulation of immune system process,positive regulation of immune system process,lymphocyte activation,leukocyte differentiation,regulation of cell activation,regulation of leukocyte activation,immune system development,T cell activation,hemopoiesis,hematopoietic or lymphoid organ development,regulation of lymphocyte activ…	ocu05340,ocu04068	Primary immunodeficiency,FoxO signaling pathway
ENSOCUT00000003032	ENSOCUG00000003031	GGH	3:78802066-78831793	136.442	7.25372	4.23342	5e-05	0.00164462	gamma-glutamyl hydrolase [Source:HGNC Symbol;Acc:HGNC:4248]	GO:0044421,GO:0005576,GO:0031982,GO:0031988,GO:0070062,GO:0043230,GO:0065010,GO:0005615,GO:0005575,GO:0016787,GO:0008233,GO:0070011,GO:0043226,GO:0008150,GO:0043227,GO:0005623,GO:0044464,GO:0044710,GO:0009987,GO:0034722,GO:0003674,GO:0008238,GO:0044424,GO:0044281,GO:0019752,GO:0043436,GO:0005622,GO:0006082,GO:0043229,GO:1901564,GO:0008242,GO:0003824,GO:1901605,GO:0043231,GO:0005634,GO:0009064,GO:…	extracellular region part,extracellular region,vesicle,membrane-bounded vesicle,extracellular vesicular exosome,extracellular organelle,extracellular membrane-bounded organelle,extracellular space,cellular_component,hydrolase activity,peptidase activity,peptidase activity, acting on L-amino acid peptides,organelle,biological_process,membrane-bounded organelle,cell,cell part,single-organism metabo…	ocu00790	Folate biosynthesis
ENSOCUT00000000074	ENSOCUG00000000074	HMGB2	2:51195340-51197513	70.9388	533.199	-2.91003	5e-05	0.00164462	high mobility group box 2 [Source:HGNC Symbol;Acc:HGNC:5000]	GO:0002376,GO:0006955,GO:0002682,GO:0044421,GO:0005576,GO:0002520,GO:0030097,GO:0048534,GO:0006952,GO:0051239,GO:0050896,GO:0070887,GO:0002237,GO:0010033,GO:0006950,GO:0009617,GO:0048731,GO:0007275,GO:0006954,GO:0032496,GO:0048518,GO:0044699,GO:0009611,GO:0048513,GO:0005615,GO:0060326,GO:0051707,GO:0044767,GO:0000785,GO:0048856,GO:0071219,GO:0009607,GO:0044427,GO:0044763,GO:0016477,GO:0048522,GO:…	immune system process,immune response,regulation of immune system process,extracellular region part,extracellular region,immune system development,hemopoiesis,hematopoietic or lymphoid organ development,defense response,regulation of multicellular organismal process,response to stimulus,cellular response to chemical stimulus,response to molecule of bacterial origin,response to organic substance,r…	--	--
ENSOCUT00000023862	ENSOCUG00000022391	-	10:21473873-21534045	2.60505	30.8043	-3.56375	5e-05	0.00164462	--	GO:0005575,GO:0016020,GO:0016021,GO:0031224,GO:0044425	cellular_component,membrane,integral to membrane,intrinsic to membrane,membrane part	--	--
ENSOCUT00000004218	ENSOCUG00000004218	CD14	3:22754437-22755771	165.89	15.0458	3.46279	5e-05	0.00164462	CD14 molecule [Source:HGNC Symbol;Acc:HGNC:1628]	GO:0002376,GO:0006955,GO:0002682,GO:0044421,GO:0005576,GO:0002684,GO:0001816,GO:0009986,GO:0006952,GO:0001817,GO:0051239,GO:0050896,GO:0070887,GO:0002237,GO:0010033,GO:0031982,GO:0031988,GO:0006950,GO:0048584,GO:0009617,GO:0050778,GO:0044459,GO:0050776,GO:0070062,GO:0043230,GO:0065010,GO:0006954,GO:0032496,GO:0048518,GO:0044699,GO:0009611,GO:0002764,GO:0005615,GO:0051707,GO:0071219,GO:0009607,GO:…	immune system process,immune response,regulation of immune system process,extracellular region part,extracellular region,positive regulation of immune system process,cytokine production,cell surface,defense response,regulation of cytokine production,regulation of multicellular organismal process,response to stimulus,cellular response to chemical stimulus,response to molecule of bacterial origin,r…	ocu04640,ocu05146,ocu05152,ocu05202,ocu04145,ocu04620,ocu04064,ocu05133,ocu05134,ocu05132,ocu04010,ocu04810	Hematopoietic cell lineage,Amoebiasis,Tuberculosis,Transcriptional misregulation in cancer,Phagosome,Toll-like receptor signaling pathway,NF-kappa B signaling pathway,Pertussis,Legionellosis,Salmonella infection,MAPK signaling pathway,Regulation of actin cytoskeleton
ENSOCUT00000026747	ENSOCUG00000021580	FGF23	8:30469058-30477170	68.606	0.263306	8.02545	5e-05	0.00164462	fibroblast growth factor 23 [Source:HGNC Symbol;Acc:HGNC:3680]	GO:0044421,GO:0005576,GO:0051239,GO:0050896,GO:0070887,GO:0010033,GO:0048584,GO:0048731,GO:0007275,GO:0048518,GO:0044699,GO:0048513,GO:0005615,GO:0048856,GO:0044763,GO:0048522,GO:0048583,GO:0032502,GO:2000026,GO:0005575,GO:0005515,GO:0042221,GO:0071310,GO:0048519,GO:0051179,GO:0030154,GO:0044707,GO:0032879,GO:0048523,GO:0032501,GO:0051716,GO:0023056,GO:0009967,GO:0050793,GO:0010647,GO:0007243,GO:…	extracellular region part,extracellular region,regulation of multicellular organismal process,response to stimulus,cellular response to chemical stimulus,response to organic substance,positive regulation of response to stimulus,system development,multicellular organismal development,positive regulation of biological process,single-organism process,organ development,extracellular space,anatomical …	ocu04151,ocu04015,ocu05200,ocu05218,ocu04010,ocu04014,ocu04810	PI3K-Akt signaling pathway,Rap1 signaling pathway,Pathways in cancer,Melanoma,MAPK signaling pathway,Ras signaling pathway,Regulation of actin cytoskeleton
ENSOCUT00000026741	ENSOCUG00000022093	ACAN	GL018934:58770-95287	4.02696	0.649857	2.6315	5e-05	0.00164462	aggrecan [Source:HGNC Symbol;Acc:HGNC:319]	GO:0044421,GO:0005576,GO:0048731,GO:0007275,GO:0044699,GO:0048513,GO:0044767,GO:0048856,GO:0031012,GO:0044763,GO:0032502,GO:0005575,GO:0005515,GO:0005578,GO:0030154,GO:0044707,GO:0022610,GO:0032501,GO:0007155,GO:0048869,GO:0044420,GO:0097367,GO:0005509,GO:0005488,GO:0005539,GO:0016337,GO:0009653,GO:0030198,GO:0043062,GO:0072358,GO:0072359,GO:0009888,GO:0016043,GO:0071840,GO:0005604,GO:0008150,GO:…	extracellular region part,extracellular region,system development,multicellular organismal development,single-organism process,organ development,single-organism developmental process,anatomical structure development,extracellular matrix,single-organism cellular process,developmental process,cellular_component,protein binding,proteinaceous extracellular matrix,cell differentiation,single-multicell…	--	--
ENSOCUT00000030346	ENSOCUG00000023134	DPAGT1	GL018823:567092-572625	12.8649	57.3469	-2.15628	5e-05	0.00164462	dolichyl-phosphate N-acetylglucosaminephosphotransferase 1 [Source:HGNC Symbol;Acc:HGNC:2995]	GO:0005575,GO:0016020,GO:0016021,GO:0031224,GO:0044425,GO:0006066,GO:1901615,GO:0046165,GO:0006629,GO:0044283,GO:0008610,GO:1901617,GO:0044711,GO:0043226,GO:0008150,GO:0043227,GO:0044255,GO:0005623,GO:0044464,GO:0044710,GO:0009987,GO:0003975,GO:0008963,GO:0006464,GO:0036211,GO:0016094,GO:0019408,GO:0043412,GO:0003976,GO:0003674,GO:0016772,GO:0044424,GO:0044281,GO:0019538,GO:0016093,GO:0019348,GO:…	cellular_component,membrane,integral to membrane,intrinsic to membrane,membrane part,alcohol metabolic process,organic hydroxy compound metabolic process,alcohol biosynthetic process,lipid metabolic process,small molecule biosynthetic process,lipid biosynthetic process,organic hydroxy compound biosynthetic process,single-organism biosynthetic process,organelle,biological_process,membrane-bounded …	ocu00510,ocu01100	N-Glycan biosynthesis,Metabolic pathways
ENSOCUT00000003208	ENSOCUG00000003209	CCBE1	9:99759612-99927289	5.32804	0.654105	3.02601	5e-05	0.00164462	collagen and calcium binding EGF domains 1 [Source:HGNC Symbol;Acc:HGNC:29426]	GO:0044421,GO:0005576,GO:0001816,GO:0001817,GO:0051239,GO:0050896,GO:0070887,GO:0010033,GO:0048584,GO:0048731,GO:0007275,GO:0048518,GO:0044699,GO:0048513,GO:0005615,GO:0044767,GO:0048856,GO:0031012,GO:0040017,GO:0044763,GO:0051272,GO:0016477,GO:0048522,GO:0048583,GO:0030335,GO:0032502,GO:2000026,GO:0005575,GO:2000147,GO:0005515,GO:0040011,GO:0042221,GO:0071310,GO:0048870,GO:0051674,GO:0051179,GO:…	extracellular region part,extracellular region,cytokine production,regulation of cytokine production,regulation of multicellular organismal process,response to stimulus,cellular response to chemical stimulus,response to organic substance,positive regulation of response to stimulus,system development,multicellular organismal development,positive regulation of biological process,single-organism pro…	--	--
ENSOCUT00000025544	ENSOCUG00000004762	SYNJ2	12:148187593-148250794	6.94648	1.67937	2.04836	5e-05	0.00164462	synaptojanin 2 [Source:HGNC Symbol;Acc:HGNC:11504]	GO:0005515,GO:0005488,GO:0016787,GO:0006629,GO:0006793,GO:0008150,GO:0006796,GO:0044255,GO:0044710,GO:0009987,GO:0003674,GO:0030258,GO:0036094,GO:0046486,GO:0003824,GO:0016788,GO:0000166,GO:1901265,GO:1901363,GO:0097159,GO:0046856,GO:0042578,GO:0044238,GO:0071704,GO:0019637,GO:0046839,GO:0006650,GO:0006644,GO:0016311,GO:0008152,GO:0046488,GO:0003676,GO:0044237	protein binding,binding,hydrolase activity,lipid metabolic process,phosphorus metabolic process,biological_process,phosphate-containing compound metabolic process,cellular lipid metabolic process,single-organism metabolic process,cellular process,molecular_function,lipid modification,small molecule binding,glycerolipid metabolic process,catalytic activity,hydrolase activity, acting on ester bonds…	ocu04070,ocu00562,ocu01100	Phosphatidylinositol signaling system,Inositol phosphate metabolism,Metabolic pathways
ENSOCUT00000030622	ENSOCUG00000023579	MEGF6	AAGW02082356:110-7682	4.02923	20.0927	-2.31809	5e-05	0.00164462	--	GO:0005515,GO:0005488,GO:0003674	protein binding,binding,molecular_function	--	--
ENSOCUT00000005465	ENSOCUG00000005469	PTH	1:155284685-155288233	454.778	44.3074	3.35954	5e-05	0.00164462	parathyroid hormone [Source:HGNC Symbol;Acc:HGNC:9606]	GO:0044421,GO:0005576,GO:0051239,GO:0050896,GO:0048584,GO:0048731,GO:0007275,GO:0048518,GO:0044699,GO:0070661,GO:0048513,GO:0005615,GO:0048856,GO:0044763,GO:0048522,GO:0048583,GO:0070663,GO:0032502,GO:2000026,GO:0005575,GO:0008283,GO:0005515,GO:0048519,GO:0051179,GO:0042127,GO:0044707,GO:0032879,GO:0048523,GO:0051094,GO:0032501,GO:0070665,GO:0051716,GO:0023056,GO:0009967,GO:0050793,GO:0010647,GO:…	extracellular region part,extracellular region,regulation of multicellular organismal process,response to stimulus,positive regulation of response to stimulus,system development,multicellular organismal development,positive regulation of biological process,single-organism process,leukocyte proliferation,organ development,extracellular space,anatomical structure development,single-organism cellula…	--	--
ENSOCUT00000010051	ENSOCUG00000010052	NFATC3	5:23619731-23771588	13.543	67.2004	-2.31092	5e-05	0.00164462	nuclear factor of activated T-cells 3 [Source:HGNC Symbol;Acc:HGNC:7777]	GO:0048518,GO:0048522,GO:0005575,GO:0005515,GO:0005488,GO:0043228,GO:0043232,GO:0065007,GO:0050794,GO:0050789,GO:0003677,GO:0009893,GO:0043226,GO:0008150,GO:0043227,GO:0031325,GO:0010604,GO:0001227,GO:0005623,GO:0044464,GO:0000982,GO:0005737,GO:0009987,GO:0000981,GO:0080090,GO:0019222,GO:0003674,GO:0031323,GO:0044424,GO:0000975,GO:0001067,GO:0060255,GO:0044422,GO:0001077,GO:0044212,GO:0044446,GO:…	positive regulation of biological process,positive regulation of cellular process,cellular_component,protein binding,binding,non-membrane-bounded organelle,intracellular non-membrane-bounded organelle,biological regulation,regulation of cellular process,regulation of biological process,DNA binding,positive regulation of metabolic process,organelle,biological_process,membrane-bounded organelle,pos…	ocu04660,ocu05166,ocu04662,ocu05161,ocu04010,ocu04921,ocu04310,ocu04360,ocu04022	T cell receptor signaling pathway,HTLV-I infection,B cell receptor signaling pathway,Hepatitis B,MAPK signaling pathway,Oxytocin signaling pathway,Wnt signaling pathway,Axon guidance,cGMP-PKG signaling pathway
ENSOCUT00000017006	ENSOCUG00000017009	AMICA1	GL018782:271101-299138	12.0815	46.2404	-1.93635	5e-05	0.00164462	junction adhesion molecule like [Source:HGNC Symbol;Acc:HGNC:19084]	GO:0002376,GO:0045321,GO:0001775,GO:0046649,GO:0042110,GO:0050896,GO:0070887,GO:0006950,GO:0046983,GO:0048518,GO:0044699,GO:0009611,GO:0060326,GO:0044763,GO:0016477,GO:0048522,GO:0009605,GO:0005575,GO:0008283,GO:0005515,GO:0040011,GO:0042221,GO:0006935,GO:0042330,GO:0048870,GO:0051674,GO:0051179,GO:0050900,GO:0006928,GO:0042127,GO:0071944,GO:0022610,GO:0051716,GO:0005886,GO:0007155,GO:0008284,GO:…	immune system process,leukocyte activation,cell activation,lymphocyte activation,T cell activation,response to stimulus,cellular response to chemical stimulus,response to stress,protein dimerization activity,positive regulation of biological process,single-organism process,response to wounding,cell chemotaxis,single-organism cellular process,cell migration,positive regulation of cellular process,…	--	--
ENSOCUT00000013656	ENSOCUG00000013658	-	13:97730392-97754613	1.51532	10.2113	-2.75247	5e-05	0.00164462	--	GO:0050896,GO:0044699,GO:0044763,GO:0005575,GO:0051716,GO:0065007,GO:0050794,GO:0035556,GO:0007165,GO:0050789,GO:0007154,GO:0044700,GO:0023052,GO:0008150,GO:0005623,GO:0044464,GO:0009987,GO:0005622	response to stimulus,single-organism process,single-organism cellular process,cellular_component,cellular response to stimulus,biological regulation,regulation of cellular process,intracellular signal transduction,signal transduction,regulation of biological process,cell communication,single organism signaling,signaling,biological_process,cell,cell part,cellular process,intracellular	--	--
ENSOCUT00000013657	ENSOCUG00000013659	CDC25B	4:10663573-10672833	5.12124	26.0905	-2.34896	5e-05	0.00164462	cell division cycle 25B [Source:HGNC Symbol;Acc:HGNC:1726]	GO:0048518,GO:0044699,GO:0044767,GO:0048856,GO:0044763,GO:0048522,GO:0032502,GO:0005575,GO:0005515,GO:0030154,GO:0032501,GO:0048869,GO:0000278,GO:0006468,GO:0005488,GO:0022402,GO:0007049,GO:0007346,GO:0043228,GO:0043232,GO:0065007,GO:0044093,GO:0050794,GO:0005856,GO:0045860,GO:0051247,GO:0051726,GO:0050789,GO:0051347,GO:0033674,GO:0065009,GO:0016310,GO:0044430,GO:0001934,GO:0010562,GO:0045937,GO:…	positive regulation of biological process,single-organism process,single-organism developmental process,anatomical structure development,single-organism cellular process,positive regulation of cellular process,developmental process,cellular_component,protein binding,cell differentiation,multicellular organismal process,cellular developmental process,mitotic cell cycle,protein phosphorylation,bind…	ocu04110,ocu05206,ocu04914,ocu04010	Cell cycle,MicroRNAs in cancer,Progesterone-mediated oocyte maturation,MAPK signaling pathway
ENSOCUT00000017829	ENSOCUG00000017831	PTAFR	13:137360751-137361780	16.2626	2.84353	2.51581	5e-05	0.00164462	platelet activating factor receptor [Source:HGNC Symbol;Acc:HGNC:9582]	GO:0001816,GO:0006952,GO:0050896,GO:0002237,GO:0010033,GO:0006950,GO:0009617,GO:0006954,GO:0032496,GO:0044699,GO:0009611,GO:0051707,GO:0009607,GO:0044763,GO:0009605,GO:0005575,GO:0040011,GO:0042221,GO:0006935,GO:0042330,GO:1901700,GO:0044707,GO:0051704,GO:0071944,GO:0032501,GO:0051716,GO:0005886,GO:0033993,GO:0001530,GO:0005488,GO:0016020,GO:0065007,GO:0008329,GO:0038187,GO:0016021,GO:0031224,GO:…	cytokine production,defense response,response to stimulus,response to molecule of bacterial origin,response to organic substance,response to stress,response to bacterium,inflammatory response,response to lipopolysaccharide,single-organism process,response to wounding,response to other organism,response to biotic stimulus,single-organism cellular process,response to external stimulus,cellular_comp…	ocu05150,ocu04020,ocu04080	Staphylococcus aureus infection,Calcium signaling pathway,Neuroactive ligand-receptor interaction
ENSOCUT00000029666	ENSOCUG00000022945	ASNS	10:31564639-31585374	2.98005	13.5667	-2.18666	5e-05	0.00164462	asparagine synthetase (glutamine-hydrolyzing) [Source:HGNC Symbol;Acc:HGNC:753]	GO:0050896,GO:0006950,GO:0048518,GO:0044699,GO:0044763,GO:0048522,GO:0009605,GO:0005515,GO:0048519,GO:0048523,GO:0051716,GO:0043067,GO:0042981,GO:0006915,GO:0012501,GO:0043066,GO:0008219,GO:0016265,GO:0043069,GO:0000278,GO:0010941,GO:0005488,GO:0060548,GO:0007049,GO:0007346,GO:0065007,GO:0050794,GO:0051726,GO:0050789,GO:0007154,GO:0044283,GO:0044711,GO:0008150,GO:0004066,GO:0006529,GO:0016053,GO:…	response to stimulus,response to stress,positive regulation of biological process,single-organism process,single-organism cellular process,positive regulation of cellular process,response to external stimulus,protein binding,negative regulation of biological process,negative regulation of cellular process,cellular response to stimulus,regulation of programmed cell death,regulation of apoptotic pr…	ocu00250,ocu01100	Alanine, aspartate and glutamate metabolism,Metabolic pathways
ENSOCUT00000014014	ENSOCUG00000014003	BUB1	2:95738070-95777471	1.498	12.3566	-3.04417	5e-05	0.00164462	BUB1 mitotic checkpoint serine/threonine kinase [Source:HGNC Symbol;Acc:HGNC:1148]	GO:0044699,GO:0044427,GO:0044763,GO:0005694,GO:0005575,GO:0005515,GO:0048519,GO:0048523,GO:0000278,GO:0007059,GO:0006468,GO:0005488,GO:0022402,GO:0007049,GO:0016020,GO:0000280,GO:0007067,GO:0007346,GO:0043228,GO:0043232,GO:0065007,GO:0050794,GO:0000779,GO:0000793,GO:0000780,GO:0051726,GO:0050789,GO:1901991,GO:0016310,GO:1901990,GO:0048285,GO:0010948,GO:1901988,GO:0000775,GO:1901987,GO:0010564,GO:…	single-organism process,chromosomal part,single-organism cellular process,chromosome,cellular_component,protein binding,negative regulation of biological process,negative regulation of cellular process,mitotic cell cycle,chromosome segregation,protein phosphorylation,binding,cell cycle process,cell cycle,membrane,nuclear division,mitosis,regulation of mitotic cell cycle,non-membrane-bounded organ…	ocu04110,ocu04914,ocu04114	Cell cycle,Progesterone-mediated oocyte maturation,Oocyte meiosis
ENSOCUT00000027066	ENSOCUG00000026061	-	12:11021613-11022024	11.0345	250.657	-4.50563	5e-05	0.00164462	--	GO:0000786,GO:0032993,GO:0046982,GO:0046983,GO:0000785,GO:0044427,GO:0005694,GO:0005575,GO:0005515,GO:0005488,GO:0043228,GO:0043232,GO:0003677,GO:0043226,GO:0043227,GO:0005623,GO:0044464,GO:0003674,GO:0044424,GO:0044422,GO:0044446,GO:0005622,GO:0032991,GO:0043229,GO:0043231,GO:0005634,GO:1901363,GO:0097159,GO:0003676	nucleosome,protein-DNA complex,protein heterodimerization activity,protein dimerization activity,chromatin,chromosomal part,chromosome,cellular_component,protein binding,binding,non-membrane-bounded organelle,intracellular non-membrane-bounded organelle,DNA binding,organelle,membrane-bounded organelle,cell,cell part,molecular_function,intracellular part,organelle part,intracellular organelle part…	ocu05322,ocu05034,ocu05202	Systemic lupus erythematosus,Alcoholism,Transcriptional misregulation in cancer
ENSOCUT00000017906	ENSOCUG00000017905	PCK1	GL019719:4743-9944	3.6526	41.67	-3.51201	5e-05	0.00164462	phosphoenolpyruvate carboxykinase 1 [Source:HGNC Symbol;Acc:HGNC:8724]	GO:0044421,GO:0005576,GO:0050896,GO:0010033,GO:0031982,GO:0031988,GO:0006950,GO:0070062,GO:0043230,GO:0065010,GO:0048518,GO:0044699,GO:0044763,GO:0048522,GO:0009605,GO:0005575,GO:0042221,GO:1901700,GO:0051716,GO:0005488,GO:0065007,GO:0050794,GO:0050789,GO:0009719,GO:0006066,GO:0007154,GO:1901615,GO:0019432,GO:0046460,GO:0046463,GO:0046165,GO:0006629,GO:0044283,GO:0008610,GO:0009628,GO:1901617,GO:…	extracellular region part,extracellular region,response to stimulus,response to organic substance,vesicle,membrane-bounded vesicle,response to stress,extracellular vesicular exosome,extracellular organelle,extracellular membrane-bounded organelle,positive regulation of biological process,single-organism process,single-organism cellular process,positive regulation of cellular process,response to e…	ocu04151,ocu03320,ocu04068,ocu00010,ocu04152,ocu04920,ocu04964,ocu04910,ocu00620,ocu00020,ocu01100	PI3K-Akt signaling pathway,PPAR signaling pathway,FoxO signaling pathway,Glycolysis / Gluconeogenesis,AMPK signaling pathway,Adipocytokine signaling pathway,Proximal tubule bicarbonate reclamation,Insulin signaling pathway,Pyruvate metabolism,Citrate cycle (TCA cycle),Metabolic pathways
ENSOCUT00000002632	ENSOCUG00000002624	NRK	X:54492722-54634516	9.995	2.63992	1.92071	5e-05	0.00164462	Nik related kinase [Source:HGNC Symbol;Acc:HGNC:25391]	GO:0051239,GO:0050896,GO:0006950,GO:0048731,GO:0007275,GO:0048518,GO:0044699,GO:0048513,GO:0044767,GO:0048856,GO:0044763,GO:0048522,GO:0048583,GO:0032502,GO:2000026,GO:0005575,GO:0008283,GO:0048519,GO:0042127,GO:0044707,GO:0051704,GO:0048523,GO:0032501,GO:0051716,GO:0050793,GO:0007243,GO:0009966,GO:0010627,GO:0006468,GO:0023051,GO:0005488,GO:0000165,GO:0010646,GO:0043408,GO:0080134,GO:0065007,GO:…	regulation of multicellular organismal process,response to stimulus,response to stress,system development,multicellular organismal development,positive regulation of biological process,single-organism process,organ development,single-organism developmental process,anatomical structure development,single-organism cellular process,positive regulation of cellular process,regulation of response to st…	--	--
ENSOCUT00000017271	ENSOCUG00000017274	CTLA4	7:144536435-144544163	0.373261	21.3465	-5.83767	5e-05	0.00164462	cytotoxic T-lymphocyte protein 4 precursor [Source:RefSeq peptide;Acc:NP_001076154]	GO:0002376,GO:0006955,GO:0045321,GO:0001775,GO:0002682,GO:0002684,GO:0046649,GO:0002521,GO:0050865,GO:0002694,GO:0002520,GO:0042110,GO:0030097,GO:0048534,GO:0009986,GO:0051249,GO:0051239,GO:0030098,GO:0050896,GO:0050863,GO:0031982,GO:0031988,GO:0006950,GO:0048584,GO:0048731,GO:0050778,GO:0044459,GO:0050776,GO:0007275,GO:0030217,GO:0048518,GO:0044699,GO:0046651,GO:0032943,GO:0002764,GO:0070661,GO:…	immune system process,immune response,leukocyte activation,cell activation,regulation of immune system process,positive regulation of immune system process,lymphocyte activation,leukocyte differentiation,regulation of cell activation,regulation of leukocyte activation,immune system development,T cell activation,hemopoiesis,hematopoietic or lymphoid organ development,cell surface,regulation of lym…	ocu05323,ocu04514,ocu04660,ocu05320	Rheumatoid arthritis,Cell adhesion molecules (CAMs),T cell receptor signaling pathway,Autoimmune thyroid disease
ENSOCUT00000030855	ENSOCUG00000027718	PRSS56	GL018736:135992-140301	12.577	0.623425	4.33443	5e-05	0.00164462	protease, serine 56 [Source:HGNC Symbol;Acc:HGNC:39433]	GO:0048731,GO:0007275,GO:0044699,GO:0048513,GO:0044767,GO:0048856,GO:0032502,GO:0005575,GO:0044707,GO:0032501,GO:0016787,GO:0004175,GO:0008233,GO:0017171,GO:0070011,GO:0008236,GO:0043226,GO:0008150,GO:0043227,GO:0004252,GO:0007423,GO:0005623,GO:0044464,GO:0006508,GO:0005737,GO:0001654,GO:0003674,GO:0044424,GO:0019538,GO:0043010,GO:0005622,GO:0005783,GO:0043229,GO:0003824,GO:0043231,GO:0044444,GO:…	system development,multicellular organismal development,single-organism process,organ development,single-organism developmental process,anatomical structure development,developmental process,cellular_component,single-multicellular organism process,multicellular organismal process,hydrolase activity,endopeptidase activity,peptidase activity,serine hydrolase activity,peptidase activity, acting on L…	--	--
ENSOCUT00000030277	ENSOCUG00000024530	apoCI	GL019011:106233-108836	3.99413	0	inf	5e-05	0.00164462	Oryctolagus cuniculus apolipoprotein C-I (APOC1), mRNA. [Source:RefSeq mRNA;Acc:NM_001160281]	GO:0044421,GO:0005576,GO:0051239,GO:0031982,GO:0031988,GO:0070062,GO:0043230,GO:0065010,GO:0044699,GO:0005615,GO:0005575,GO:0048519,GO:0051179,GO:0044707,GO:0032879,GO:0048523,GO:0032501,GO:0005488,GO:0051049,GO:0051241,GO:0051051,GO:0065007,GO:0006897,GO:0044765,GO:0010876,GO:0050794,GO:0050789,GO:0051234,GO:0065009,GO:0006810,GO:0006066,GO:0015711,GO:0016125,GO:0006869,GO:1901615,GO:0097006,GO:…	extracellular region part,extracellular region,regulation of multicellular organismal process,vesicle,membrane-bounded vesicle,extracellular vesicular exosome,extracellular organelle,extracellular membrane-bounded organelle,single-organism process,extracellular space,cellular_component,negative regulation of biological process,localization,single-multicellular organism process,regulation of local…	--	--
ENSOCUT00000007265	ENSOCUG00000007265	TREM2	12:30912168-30918630	171.048	4.46369	5.26002	5e-05	0.00164462	triggering receptor expressed on myeloid cells 2 [Source:HGNC Symbol;Acc:HGNC:17761]	GO:0002376,GO:0002682,GO:0002684,GO:0002521,GO:0002520,GO:0030097,GO:0048534,GO:0050896,GO:0070887,GO:0002237,GO:0010033,GO:0048584,GO:0009617,GO:0048731,GO:0007275,GO:0032496,GO:0048518,GO:0044699,GO:0048513,GO:0051707,GO:0044767,GO:0048856,GO:0071219,GO:0009607,GO:0044763,GO:0048522,GO:0071216,GO:0048583,GO:0032502,GO:0005575,GO:0005515,GO:0042221,GO:0071310,GO:0051179,GO:1901700,GO:0030154,GO:…	immune system process,regulation of immune system process,positive regulation of immune system process,leukocyte differentiation,immune system development,hemopoiesis,hematopoietic or lymphoid organ development,response to stimulus,cellular response to chemical stimulus,response to molecule of bacterial origin,response to organic substance,positive regulation of response to stimulus,response to b…	ocu04380	Osteoclast differentiation
ENSOCUT00000001143	ENSOCUG00000001144	SLC6A6	9:9954524-9998069	23.9245	6.41143	1.89977	5e-05	0.00164462	solute carrier family 6 member 6 [Source:HGNC Symbol;Acc:HGNC:11052]	GO:0044459,GO:0044699,GO:0005575,GO:0051179,GO:0071944,GO:0005886,GO:0016020,GO:0016021,GO:0044765,GO:0031224,GO:0044425,GO:0051234,GO:0006810,GO:0071702,GO:0031226,GO:0008150,GO:0005342,GO:0005887,GO:0005623,GO:0044464,GO:0022804,GO:0005368,GO:0005369,GO:0015734,GO:0005215,GO:0003674,GO:1901682,GO:0005343,GO:0015291,GO:0005328,GO:0005326,GO:0015294,GO:0022857,GO:0071705,GO:0015293,GO:0015370,GO:…	plasma membrane part,single-organism process,cellular_component,localization,cell periphery,plasma membrane,membrane,integral to membrane,single-organism transport,intrinsic to membrane,membrane part,establishment of localization,transport,organic substance transport,intrinsic to plasma membrane,biological_process,organic acid transmembrane transporter activity,integral to plasma membrane,cell,ce…	--	--
ENSOCUT00000014445	ENSOCUG00000014447	-	12:10913956-10914337	21.4189	209.777	-3.2919	5e-05	0.00164462	--	GO:0000786,GO:0032993,GO:0046982,GO:0046983,GO:0000785,GO:0044427,GO:0005694,GO:0005575,GO:0005515,GO:0005488,GO:0043228,GO:0043232,GO:0003677,GO:0043226,GO:0043227,GO:0005623,GO:0044464,GO:0003674,GO:0044424,GO:0044422,GO:0044446,GO:0005622,GO:0032991,GO:0043229,GO:0043231,GO:0005634,GO:1901363,GO:0097159,GO:0003676	nucleosome,protein-DNA complex,protein heterodimerization activity,protein dimerization activity,chromatin,chromosomal part,chromosome,cellular_component,protein binding,binding,non-membrane-bounded organelle,intracellular non-membrane-bounded organelle,DNA binding,organelle,membrane-bounded organelle,cell,cell part,molecular_function,intracellular part,organelle part,intracellular organelle part…	ocu05322,ocu05034,ocu05203	Systemic lupus erythematosus,Alcoholism,Viral carcinogenesis
ENSOCUT00000014441	ENSOCUG00000027815	-	13:31541154-31550149	20.5603	1.91864	3.4217	5e-05	0.00164462	--	--	--	ocu05322,ocu05150,ocu05152,ocu04145,ocu05140,ocu04380,ocu04650	Systemic lupus erythematosus,Staphylococcus aureus infection,Tuberculosis,Phagosome,Leishmaniasis,Osteoclast differentiation,Natural killer cell mediated cytotoxicity
ENSOCUT00000014448	ENSOCUG00000014451	-	12:10895200-10895581	16.8481	146.858	-3.12376	5e-05	0.00164462	--	GO:0000786,GO:0032993,GO:0046982,GO:0046983,GO:0000785,GO:0044427,GO:0005694,GO:0005575,GO:0005515,GO:0005488,GO:0043228,GO:0043232,GO:0003677,GO:0043226,GO:0043227,GO:0005623,GO:0044464,GO:0003674,GO:0044424,GO:0044422,GO:0044446,GO:0005622,GO:0032991,GO:0043229,GO:0043231,GO:0005634,GO:1901363,GO:0097159,GO:0003676	nucleosome,protein-DNA complex,protein heterodimerization activity,protein dimerization activity,chromatin,chromosomal part,chromosome,cellular_component,protein binding,binding,non-membrane-bounded organelle,intracellular non-membrane-bounded organelle,DNA binding,organelle,membrane-bounded organelle,cell,cell part,molecular_function,intracellular part,organelle part,intracellular organelle part…	ocu05322,ocu05034,ocu05203	Systemic lupus erythematosus,Alcoholism,Viral carcinogenesis
ENSOCUT00000023948	ENSOCUG00000023697	LRRN1	GL018703:4231438-4233673	0.494844	11.3139	-4.51498	5e-05	0.00164462	leucine rich repeat neuronal 1 [Source:HGNC Symbol;Acc:HGNC:20980]	GO:0051239,GO:0048731,GO:0007275,GO:0048518,GO:0044699,GO:0048856,GO:0044763,GO:0048522,GO:0032502,GO:2000026,GO:0005575,GO:0044707,GO:0051094,GO:0032501,GO:0050793,GO:0016020,GO:0065007,GO:0016021,GO:0031224,GO:0050794,GO:0050789,GO:0044425,GO:0007154,GO:0044700,GO:0023052,GO:0016043,GO:0065008,GO:0071840,GO:0008150,GO:0051128,GO:0051130,GO:0009987,GO:0050808,GO:0007399,GO:0007416,GO:0050807,GO:…	regulation of multicellular organismal process,system development,multicellular organismal development,positive regulation of biological process,single-organism process,anatomical structure development,single-organism cellular process,positive regulation of cellular process,developmental process,regulation of multicellular organismal development,cellular_component,single-multicellular organism pr…	--	--
ENSOCUT00000005752	ENSOCUG00000005758	ARL4C	GL018736:1857522-1858101	15.2726	105.355	-2.78624	5e-05	0.00164462	ADP ribosylation factor like GTPase 4C [Source:HGNC Symbol;Acc:HGNC:698]	GO:0050896,GO:0044699,GO:0044763,GO:0005575,GO:0005515,GO:0051179,GO:0071944,GO:0051716,GO:0005886,GO:0005488,GO:0016020,GO:0065007,GO:0044765,GO:0050794,GO:0035556,GO:0007165,GO:0050789,GO:0051234,GO:0006810,GO:0007154,GO:0044700,GO:0023052,GO:0051641,GO:0051649,GO:0008150,GO:0043168,GO:0016192,GO:0005623,GO:0044464,GO:0035639,GO:0032555,GO:0005737,GO:0032550,GO:0001883,GO:0017076,GO:0032549,GO:…	response to stimulus,single-organism process,single-organism cellular process,cellular_component,protein binding,localization,cell periphery,cellular response to stimulus,plasma membrane,binding,membrane,biological regulation,single-organism transport,regulation of cellular process,intracellular signal transduction,signal transduction,regulation of biological process,establishment of localization…	--	--
ENSOCUT00000001263	ENSOCUG00000001265	DCK	15:78982055-79005862	3.78667	86.2455	-4.50945	5e-05	0.00164462	deoxycytidine kinase [Source:HGNC Symbol;Acc:HGNC:2704]	GO:0046983,GO:0005575,GO:0005515,GO:0005488,GO:0042803,GO:0042802,GO:0043226,GO:0006793,GO:0008150,GO:0043168,GO:0008144,GO:0006796,GO:0043227,GO:0032559,GO:0030554,GO:0005524,GO:0005623,GO:0044464,GO:0035639,GO:0032555,GO:0032550,GO:0001883,GO:0017076,GO:0032549,GO:0001882,GO:0032553,GO:0044710,GO:0009987,GO:0004137,GO:0016301,GO:0043167,GO:0003674,GO:0016772,GO:0044424,GO:0019136,GO:0044281,GO:…	protein dimerization activity,cellular_component,protein binding,binding,protein homodimerization activity,identical protein binding,organelle,phosphorus metabolic process,biological_process,anion binding,drug binding,phosphate-containing compound metabolic process,membrane-bounded organelle,adenyl ribonucleotide binding,adenyl nucleotide binding,ATP binding,cell,cell part,purine ribonucleoside t…	ocu00230,ocu00240,ocu01100	Purine metabolism,Pyrimidine metabolism,Metabolic pathways
ENSOCUT00000028088	ENSOCUG00000022299	PI15	3:90678549-90709265	147.981	19.8155	2.90071	5e-05	0.00164462	peptidase inhibitor 15 [Source:HGNC Symbol;Acc:HGNC:8946]	GO:0044421,GO:0005576,GO:0031982,GO:0031988,GO:0070062,GO:0043230,GO:0065010,GO:0005575,GO:0043226,GO:0043227	extracellular region part,extracellular region,vesicle,membrane-bounded vesicle,extracellular vesicular exosome,extracellular organelle,extracellular membrane-bounded organelle,cellular_component,organelle,membrane-bounded organelle	--	--
ENSOCUT00000022251	ENSOCUG00000010417	CTSZ	GL018755:388184-395614	288.976	48.1617	2.58499	5e-05	0.00164462	cathepsin Z [Source:HGNC Symbol;Acc:HGNC:2547]	GO:0044421,GO:0005576,GO:0031982,GO:0031988,GO:0048731,GO:0007275,GO:0070062,GO:0043230,GO:0065010,GO:0044699,GO:0048513,GO:0005615,GO:0044767,GO:0048856,GO:0032502,GO:0005575,GO:0005515,GO:0044707,GO:0032501,GO:0005488,GO:0009653,GO:0009888,GO:0048729,GO:0016787,GO:0002009,GO:0008233,GO:0070011,GO:0043226,GO:0060429,GO:0008150,GO:0043227,GO:0005623,GO:0044464,GO:0009887,GO:0006508,GO:0005737,GO:…	extracellular region part,extracellular region,vesicle,membrane-bounded vesicle,system development,multicellular organismal development,extracellular vesicular exosome,extracellular organelle,extracellular membrane-bounded organelle,single-organism process,organ development,extracellular space,single-organism developmental process,anatomical structure development,developmental process,cellular_co…	ocu04142	Lysosome
ENSOCUT00000022254	ENSOCUG00000025710	PLD3	GL018912:131650-146371	41.7485	7.20179	2.5353	5e-05	0.00164462	phospholipase D family member 3 [Source:HGNC Symbol;Acc:HGNC:17158]	GO:0044421,GO:0005576,GO:0031982,GO:0031988,GO:0070062,GO:0043230,GO:0065010,GO:0005575,GO:0005515,GO:0005488,GO:0016020,GO:0016021,GO:0031224,GO:0044425,GO:0043226,GO:0043227,GO:0003674,GO:0003824	extracellular region part,extracellular region,vesicle,membrane-bounded vesicle,extracellular vesicular exosome,extracellular organelle,extracellular membrane-bounded organelle,cellular_component,protein binding,binding,membrane,integral to membrane,intrinsic to membrane,membrane part,organelle,membrane-bounded organelle,molecular_function,catalytic activity	ocu00565,ocu00564,ocu01100	Ether lipid metabolism,Glycerophospholipid metabolism,Metabolic pathways
ENSOCUT00000022202	ENSOCUG00000022536	SPP1	15:62156545-62163822	215.524	32.8189	2.71525	5e-05	0.00164462	secreted phosphoprotein 1 [Source:HGNC Symbol;Acc:HGNC:11255]	GO:0044421,GO:0005576,GO:0050896,GO:0010033,GO:0031982,GO:0031988,GO:0070062,GO:0043230,GO:0065010,GO:0044699,GO:0005615,GO:0044763,GO:0009605,GO:0005575,GO:0005515,GO:0042221,GO:1901700,GO:0044707,GO:0022610,GO:0032501,GO:0007155,GO:0033993,GO:0005488,GO:0043226,GO:0008150,GO:0043227,GO:0001503,GO:0033273,GO:0009987,GO:0007584,GO:0003674,GO:0009991,GO:0033280,GO:0031667,GO:0097305,GO:0014070	extracellular region part,extracellular region,response to stimulus,response to organic substance,vesicle,membrane-bounded vesicle,extracellular vesicular exosome,extracellular organelle,extracellular membrane-bounded organelle,single-organism process,extracellular space,single-organism cellular process,response to external stimulus,cellular_component,protein binding,response to chemical stimulus…	ocu04512,ocu04151,ocu04620,ocu04510	ECM-receptor interaction,PI3K-Akt signaling pathway,Toll-like receptor signaling pathway,Focal adhesion
ENSOCUT00000004360	ENSOCUG00000004359	SERPINE2	7:165490428-165552183	81.1645	15.7018	2.36992	5e-05	0.00164462	serpin family E member 2 [Source:HGNC Symbol;Acc:HGNC:8951]	GO:0001775,GO:0044421,GO:0005576,GO:0050865,GO:0009986,GO:0051239,GO:0050896,GO:0031982,GO:0031988,GO:0006950,GO:0048731,GO:0044459,GO:0007275,GO:0048518,GO:0044699,GO:0009611,GO:0048513,GO:0005615,GO:0044767,GO:0048856,GO:0031012,GO:0044763,GO:0009897,GO:0048522,GO:0048583,GO:0032502,GO:0009605,GO:2000026,GO:0005575,GO:0008283,GO:0005515,GO:0048519,GO:0051179,GO:0030154,GO:0032940,GO:0042127,GO:…	cell activation,extracellular region part,extracellular region,regulation of cell activation,cell surface,regulation of multicellular organismal process,response to stimulus,vesicle,membrane-bounded vesicle,response to stress,system development,plasma membrane part,multicellular organismal development,positive regulation of biological process,single-organism process,response to wounding,organ dev…	--	--
ENSOCUT00000011607	ENSOCUG00000011609	BCL2A1	GL018846:380403-393042	74.1813	17.8614	2.05421	5e-05	0.00164462	BCL2 related protein A1 [Source:HGNC Symbol;Acc:HGNC:991]	GO:0044699,GO:0044763,GO:0005515,GO:0048519,GO:0048523,GO:0043067,GO:0042981,GO:0006915,GO:0012501,GO:0043066,GO:0008219,GO:0016265,GO:0043069,GO:0010941,GO:0005488,GO:0060548,GO:0065007,GO:0050794,GO:0050789,GO:0008150,GO:0009987,GO:0003674	single-organism process,single-organism cellular process,protein binding,negative regulation of biological process,negative regulation of cellular process,regulation of programmed cell death,regulation of apoptotic process,apoptotic process,programmed cell death,negative regulation of apoptotic process,cell death,death,negative regulation of programmed cell death,regulation of cell death,binding,…	ocu05202,ocu04064	Transcriptional misregulation in cancer,NF-kappa B signaling pathway
ENSOCUT00000005930	ENSOCUG00000005931	-	6:27397498-27419822	23.5619	2.9124	3.01618	5e-05	0.00164462	--	GO:0005575,GO:0016020,GO:0016021,GO:0031224,GO:0044425	cellular_component,membrane,integral to membrane,intrinsic to membrane,membrane part	ocu05168	Herpes simplex infection
ENSOCUT00000000883	ENSOCUG00000000881	ANO4	4:80195723-80493003	24.4544	2.98768	3.033	5e-05	0.00164462	anoctamin 4 [Source:HGNC Symbol;Acc:HGNC:23837]	GO:0046983,GO:0044699,GO:0005575,GO:0005515,GO:0051179,GO:0071944,GO:0005886,GO:0005488,GO:0016020,GO:0016021,GO:0044765,GO:0031224,GO:0044425,GO:0051234,GO:0006810,GO:0006820,GO:0008150,GO:0006811,GO:0005548,GO:0005623,GO:0044464,GO:0005319,GO:0005215,GO:0003674,GO:0008509,GO:0017128,GO:0022857,GO:0005622,GO:0022891,GO:0022892,GO:0015108,GO:0015103,GO:0005254,GO:0015075,GO:0005229,GO:0006821,GO:…	protein dimerization activity,single-organism process,cellular_component,protein binding,localization,cell periphery,plasma membrane,binding,membrane,integral to membrane,single-organism transport,intrinsic to membrane,membrane part,establishment of localization,transport,anion transport,biological_process,ion transport,phospholipid transporter activity,cell,cell part,lipid transporter activity,t…	--	--
ENSOCUT00000027141	ENSOCUG00000023129	-	12:10795224-10795617	98.4295	652.468	-2.72874	5e-05	0.00164462	histone cluster 1, H2ac [Source:HGNC Symbol;Acc:HGNC:4733]	GO:0000786,GO:0032993,GO:0044421,GO:0005576,GO:0046982,GO:0031982,GO:0031988,GO:0046983,GO:0070062,GO:0043230,GO:0065010,GO:0044699,GO:0000785,GO:0044427,GO:0005694,GO:0005575,GO:0008283,GO:0005515,GO:0048519,GO:0042127,GO:0048523,GO:0005488,GO:0043228,GO:0043232,GO:0065007,GO:0050794,GO:0050789,GO:0003677,GO:0008285,GO:0043226,GO:0008150,GO:0043227,GO:0005623,GO:0044464,GO:0009987,GO:0003674,GO:…	nucleosome,protein-DNA complex,extracellular region part,extracellular region,protein heterodimerization activity,vesicle,membrane-bounded vesicle,protein dimerization activity,extracellular vesicular exosome,extracellular organelle,extracellular membrane-bounded organelle,single-organism process,chromatin,chromosomal part,chromosome,cellular_component,cell proliferation,protein binding,negative …	ocu05322,ocu05034	Systemic lupus erythematosus,Alcoholism
ENSOCUT00000016845	ENSOCUG00000016848	-	3:39362461-39363697	0	3.71938	#NAME?	5e-05	0.00164462	--	GO:0044699,GO:0044763,GO:0005575,GO:0016043,GO:0071840,GO:0043226,GO:0008150,GO:0043227,GO:0051276,GO:0005623,GO:0044464,GO:0009987,GO:0006325,GO:0006338,GO:0044424,GO:0006996,GO:0044422,GO:0044446,GO:0005622,GO:0032991,GO:0016568,GO:0043229,GO:0043231,GO:0005634,GO:0043044,GO:0016514,GO:0043234,GO:0090544,GO:0070603,GO:0044428	single-organism process,single-organism cellular process,cellular_component,cellular component organization,cellular component organization or biogenesis,organelle,biological_process,membrane-bounded organelle,chromosome organization,cell,cell part,cellular process,chromatin organization,chromatin remodeling,intracellular part,organelle organization,organelle part,intracellular organelle part,int…	--	--
ENSOCUT00000025813	ENSOCUG00000026452	HIST1H4F	GL018747:380902-381214	2321.04	9743.72	-2.0697	5e-05	0.00164462	histone cluster 1, H4a [Source:HGNC Symbol;Acc:HGNC:4781]	GO:0002376,GO:0000786,GO:0032993,GO:0002682,GO:0044421,GO:0005576,GO:0002520,GO:0030097,GO:0048534,GO:0051239,GO:0046982,GO:0031982,GO:0031988,GO:0048731,GO:0007275,GO:0046983,GO:0070062,GO:0043230,GO:0065010,GO:0044699,GO:0048513,GO:0044767,GO:0000785,GO:0048856,GO:0044427,GO:0044763,GO:0005694,GO:0032502,GO:2000026,GO:0005575,GO:0005515,GO:0048519,GO:0030154,GO:0044707,GO:0048523,GO:0032501,GO:…	immune system process,nucleosome,protein-DNA complex,regulation of immune system process,extracellular region part,extracellular region,immune system development,hemopoiesis,hematopoietic or lymphoid organ development,regulation of multicellular organismal process,protein heterodimerization activity,vesicle,membrane-bounded vesicle,system development,multicellular organismal development,protein d…	ocu05322,ocu05034,ocu05203	Systemic lupus erythematosus,Alcoholism,Viral carcinogenesis
ENSOCUT00000009582	ENSOCUG00000009582	CLEC5A	GL018758:681291-692294	12.1653	1.63733	2.89335	5e-05	0.00164462	C-type lectin domain family 5 member A [Source:HGNC Symbol;Acc:HGNC:2054]	GO:0002376,GO:0006955,GO:0002520,GO:0001816,GO:0030097,GO:0048534,GO:0009986,GO:0006952,GO:0001817,GO:0051239,GO:0050896,GO:0006950,GO:0048731,GO:0007275,GO:0048518,GO:0044699,GO:0048513,GO:0044767,GO:0048856,GO:0044763,GO:0048522,GO:0045087,GO:0032502,GO:0005575,GO:0005515,GO:0009306,GO:0048519,GO:0051179,GO:0030154,GO:0032940,GO:0044707,GO:0032879,GO:0048523,GO:0032501,GO:0050663,GO:0050708,GO:…	immune system process,immune response,immune system development,cytokine production,hemopoiesis,hematopoietic or lymphoid organ development,cell surface,defense response,regulation of cytokine production,regulation of multicellular organismal process,response to stimulus,response to stress,system development,multicellular organismal development,positive regulation of biological process,single-org…	--	--
ENSOCUT00000028790	ENSOCUG00000026011	-	GL018747:386597-387547	14.7215	134.551	-3.19216	5e-05	0.00164462	--	GO:0000786,GO:0032993,GO:0046982,GO:0046983,GO:0000785,GO:0044427,GO:0005694,GO:0005575,GO:0005515,GO:0005488,GO:0043228,GO:0043232,GO:0003677,GO:0043226,GO:0043227,GO:0005623,GO:0044464,GO:0003674,GO:0044424,GO:0044422,GO:0044446,GO:0005622,GO:0032991,GO:0043229,GO:0043231,GO:0005634,GO:1901363,GO:0097159,GO:0003676	nucleosome,protein-DNA complex,protein heterodimerization activity,protein dimerization activity,chromatin,chromosomal part,chromosome,cellular_component,protein binding,binding,non-membrane-bounded organelle,intracellular non-membrane-bounded organelle,DNA binding,organelle,membrane-bounded organelle,cell,cell part,molecular_function,intracellular part,organelle part,intracellular organelle part…	ocu05322,ocu05034	Systemic lupus erythematosus,Alcoholism
ENSOCUT00000022518	ENSOCUG00000022958	-	GL018758:1318841-1319349	0	21.3161	#NAME?	5e-05	0.00164462	--	--	--	--	--
ENSOCUT00000013109	ENSOCUG00000013112	PSMB11	17:43267131-43268043	0	16.8303	#NAME?	5e-05	0.00164462	proteasome subunit beta 11 [Source:HGNC Symbol;Acc:HGNC:31963]	GO:0002376,GO:0045321,GO:0001775,GO:0046649,GO:0002521,GO:0002520,GO:0042110,GO:0030097,GO:0048534,GO:0030098,GO:0048731,GO:0007275,GO:0030217,GO:0044699,GO:0048513,GO:0044767,GO:0048856,GO:0044763,GO:0032502,GO:0005575,GO:0030154,GO:0044707,GO:0032501,GO:0048869,GO:0046631,GO:0046632,GO:0016787,GO:0004175,GO:0008233,GO:0070011,GO:0043226,GO:0008150,GO:0043227,GO:0005623,GO:0044464,GO:0006508,GO:…	immune system process,leukocyte activation,cell activation,lymphocyte activation,leukocyte differentiation,immune system development,T cell activation,hemopoiesis,hematopoietic or lymphoid organ development,lymphocyte differentiation,system development,multicellular organismal development,T cell differentiation,single-organism process,organ development,single-organism developmental process,anatom…	ocu03050	Proteasome
ENSOCUT00000016656	ENSOCUG00000016650	DEPDC1B	11:76635166-76742728	1.10496	11.1478	-3.33469	5e-05	0.00164462	DEP domain containing 1B [Source:HGNC Symbol;Acc:HGNC:24902]	GO:0050896,GO:0048584,GO:0048518,GO:0044699,GO:0044763,GO:0016477,GO:0048522,GO:0048583,GO:0005575,GO:0040011,GO:0048870,GO:0051674,GO:0051179,GO:0006928,GO:0051716,GO:0023056,GO:0009967,GO:0010647,GO:0009966,GO:0023051,GO:0010646,GO:0065007,GO:0050794,GO:0035556,GO:0007165,GO:0050789,GO:0007154,GO:0044700,GO:0023052,GO:0007166,GO:0008150,GO:0005623,GO:0044464,GO:0030111,GO:0009987,GO:0016055,GO:…	response to stimulus,positive regulation of response to stimulus,positive regulation of biological process,single-organism process,single-organism cellular process,cell migration,positive regulation of cellular process,regulation of response to stimulus,cellular_component,locomotion,cell motility,localization of cell,localization,cellular component movement,cellular response to stimulus,positive …	--	--
ENSOCUT00000015235	ENSOCUG00000015232	-	14:4093825-4095893	0	6.15123	#NAME?	5e-05	0.00164462	--	GO:0005488,GO:0016787,GO:0043168,GO:0035639,GO:0032555,GO:0032550,GO:0001883,GO:0017076,GO:0032549,GO:0001882,GO:0032553,GO:0017111,GO:0043167,GO:0016462,GO:0016818,GO:0003674,GO:0016817,GO:0036094,GO:0003824,GO:0000166,GO:1901265,GO:1901363,GO:0097159,GO:0032561,GO:0019001,GO:0005525,GO:0003924	binding,hydrolase activity,anion binding,purine ribonucleoside triphosphate binding,purine ribonucleotide binding,purine ribonucleoside binding,purine nucleoside binding,purine nucleotide binding,ribonucleoside binding,nucleoside binding,ribonucleotide binding,nucleoside-triphosphatase activity,ion binding,pyrophosphatase activity,hydrolase activity, acting on acid anhydrides, in phosphorus-conta…	ocu05134,ocu03013	Legionellosis,RNA transport
ENSOCUT00000009953	ENSOCUG00000009952	NDST3	15:31489355-31670990	1.97302	49.0208	-4.63491	5e-05	0.00164462	N-deacetylase/N-sulfotransferase 3 [Source:HGNC Symbol;Acc:HGNC:7682]	GO:0005575,GO:0016020,GO:0016021,GO:0031224,GO:0044425,GO:0016787,GO:0003674,GO:0015016,GO:0034483,GO:0003824,GO:0008146,GO:0016782,GO:0016740	cellular_component,membrane,integral to membrane,intrinsic to membrane,membrane part,hydrolase activity,molecular_function,[heparan sulfate]-glucosamine N-sulfotransferase activity,heparan sulfate sulfotransferase activity,catalytic activity,sulfotransferase activity,transferase activity, transferring sulfur-containing groups,transferase activity	ocu00534,ocu01100	Glycosaminoglycan biosynthesis - heparan sulfate / heparin,Metabolic pathways
ENSOCUT00000013974	ENSOCUG00000013978	PLCL1	7:138575035-138677020	5.11821	34.7243	-2.76223	5e-05	0.00164462	phospholipase C like 1 [Source:HGNC Symbol;Acc:HGNC:9063]	GO:0051239,GO:0050896,GO:0044699,GO:0044763,GO:0005575,GO:0005515,GO:0044707,GO:0071944,GO:0032501,GO:0051716,GO:0005886,GO:0006468,GO:0005102,GO:0023051,GO:0005488,GO:0010646,GO:0016020,GO:0065007,GO:0044093,GO:0050794,GO:0035556,GO:0007165,GO:0050789,GO:0065009,GO:0016310,GO:0031399,GO:0001932,GO:0051246,GO:0051098,GO:0042325,GO:0043393,GO:0007154,GO:0044700,GO:0023052,GO:0018193,GO:0032268,GO:…	regulation of multicellular organismal process,response to stimulus,single-organism process,single-organism cellular process,cellular_component,protein binding,single-multicellular organism process,cell periphery,multicellular organismal process,cellular response to stimulus,plasma membrane,protein phosphorylation,receptor binding,regulation of signaling,binding,regulation of cell communication,m…	ocu04727	GABAergic synapse
ENSOCUT00000001542	ENSOCUG00000001542	RIPK2	3:105172431-105208358	20.3473	4.273	2.25151	5e-05	0.00164462	receptor interacting serine/threonine kinase 2 [Source:HGNC Symbol;Acc:HGNC:10020]	GO:0002376,GO:0006955,GO:0045321,GO:0001775,GO:0002682,GO:0002684,GO:0046649,GO:0002521,GO:0050865,GO:0002694,GO:0002520,GO:0001816,GO:0042110,GO:0030097,GO:0048534,GO:0051249,GO:0006952,GO:0001817,GO:0051239,GO:0030098,GO:0051251,GO:0050896,GO:0002696,GO:0070887,GO:0002237,GO:0050867,GO:0010033,GO:0050870,GO:0050863,GO:0031982,GO:0006950,GO:0048584,GO:0009617,GO:0048731,GO:0050778,GO:0050776,GO:…	immune system process,immune response,leukocyte activation,cell activation,regulation of immune system process,positive regulation of immune system process,lymphocyte activation,leukocyte differentiation,regulation of cell activation,regulation of leukocyte activation,immune system development,cytokine production,T cell activation,hemopoiesis,hematopoietic or lymphoid organ development,regulation…	ocu05152,ocu04621,ocu04722	Tuberculosis,NOD-like receptor signaling pathway,Neurotrophin signaling pathway
ENSOCUT00000005017	ENSOCUG00000005013	TENM1	X:98862793-99456609	1.12009	5.95811	-2.41124	5e-05	0.00164462	teneurin transmembrane protein 1 [Source:HGNC Symbol;Acc:HGNC:8117]	GO:0005576,GO:0046982,GO:0050896,GO:0048584,GO:0044459,GO:0046983,GO:0048518,GO:0044699,GO:0044763,GO:0048522,GO:0048583,GO:0005575,GO:0005515,GO:0071944,GO:0051716,GO:0023056,GO:0009967,GO:0010647,GO:0007243,GO:0005886,GO:0010740,GO:0009966,GO:0010627,GO:0006468,GO:0023051,GO:0005488,GO:0000165,GO:0043410,GO:0010646,GO:0043408,GO:0016020,GO:0065007,GO:0044093,GO:0016021,GO:0031224,GO:0050794,GO:…	extracellular region,protein heterodimerization activity,response to stimulus,positive regulation of response to stimulus,plasma membrane part,protein dimerization activity,positive regulation of biological process,single-organism process,single-organism cellular process,positive regulation of cellular process,regulation of response to stimulus,cellular_component,protein binding,cell periphery,ce…	--	--
ENSOCUT00000029156	ENSOCUG00000017432	SELL	13:21805631-21830812	3.65967	23.7081	-2.69559	5e-05	0.00164462	selectin L [Source:HGNC Symbol;Acc:HGNC:10720]	GO:0009986,GO:0050896,GO:0010033,GO:0044459,GO:0044699,GO:0044763,GO:0009897,GO:0005575,GO:0005515,GO:0042221,GO:1901700,GO:0071944,GO:0022610,GO:0005886,GO:0007155,GO:0005488,GO:0016020,GO:0016021,GO:0050839,GO:0031224,GO:0044425,GO:0009719,GO:0030246,GO:0008150,GO:0019899,GO:0010243,GO:0002020,GO:0005623,GO:0044464,GO:1901698,GO:0009987,GO:0033198,GO:0003674,GO:0046683,GO:0014074,GO:0014070	cell surface,response to stimulus,response to organic substance,plasma membrane part,single-organism process,single-organism cellular process,external side of plasma membrane,cellular_component,protein binding,response to chemical stimulus,response to oxygen-containing compound,cell periphery,biological adhesion,plasma membrane,cell adhesion,binding,membrane,integral to membrane,cell adhesion mol…	ocu04514	Cell adhesion molecules (CAMs)
ENSOCUT00000009502	ENSOCUG00000009504	CD80	14:99215920-99248003	23.2969	4.46105	2.38468	5e-05	0.00164462	CD80 molecule [Source:HGNC Symbol;Acc:HGNC:1700]	GO:0002376,GO:0045321,GO:0001775,GO:0002682,GO:0002684,GO:0046649,GO:0050865,GO:0002694,GO:0042110,GO:0009986,GO:0051249,GO:0051251,GO:0050896,GO:0002696,GO:0070887,GO:0002237,GO:0050867,GO:0010033,GO:0050870,GO:0050863,GO:0009617,GO:0044459,GO:0032496,GO:0048518,GO:0044699,GO:0046651,GO:0032943,GO:0070661,GO:0051707,GO:0071219,GO:0009607,GO:0044763,GO:0009897,GO:0048522,GO:0071216,GO:0070663,GO:…	immune system process,leukocyte activation,cell activation,regulation of immune system process,positive regulation of immune system process,lymphocyte activation,regulation of cell activation,regulation of leukocyte activation,T cell activation,cell surface,regulation of lymphocyte activation,positive regulation of lymphocyte activation,response to stimulus,positive regulation of leukocyte activa…	ocu05322,ocu05323,ocu04514,ocu04672,ocu05330,ocu04620,ocu05320,ocu05332,ocu05416,ocu04940	Systemic lupus erythematosus,Rheumatoid arthritis,Cell adhesion molecules (CAMs),Intestinal immune network for IgA production,Allograft rejection,Toll-like receptor signaling pathway,Autoimmune thyroid disease,Graft-versus-host disease,Viral myocarditis,Type I diabetes mellitus
ENSOCUT00000010524	ENSOCUG00000010524	RBP4	18:41282997-41288870	59.2718	278.584	-2.23269	5e-05	0.00164462	retinol binding protein 4 [Source:HGNC Symbol;Acc:HGNC:9922]	GO:0044421,GO:0005576,GO:0050896,GO:0010033,GO:0031982,GO:0031988,GO:0048731,GO:0007275,GO:0070062,GO:0043230,GO:0065010,GO:0048518,GO:0044699,GO:0048513,GO:0005615,GO:0044767,GO:0048856,GO:0044763,GO:0048522,GO:0032502,GO:0005575,GO:0005515,GO:0042221,GO:0051179,GO:1901700,GO:0032940,GO:0044707,GO:0032879,GO:0032501,GO:0046903,GO:0033993,GO:0023051,GO:0005488,GO:0051049,GO:0051050,GO:0010646,GO:…	extracellular region part,extracellular region,response to stimulus,response to organic substance,vesicle,membrane-bounded vesicle,system development,multicellular organismal development,extracellular vesicular exosome,extracellular organelle,extracellular membrane-bounded organelle,positive regulation of biological process,single-organism process,organ development,extracellular space,single-orga…	--	--
ENSOCUT00000014528	ENSOCUG00000014527	CTSC	1:128493079-128541136	410.057	95.1454	2.10762	5e-05	0.00164462	cathepsin C [Source:HGNC Symbol;Acc:HGNC:2528]	GO:0002376,GO:0006955,GO:0044421,GO:0005576,GO:0050896,GO:0031982,GO:0031988,GO:0048584,GO:0070062,GO:0043230,GO:0065010,GO:0048518,GO:0044699,GO:0005615,GO:0044763,GO:0048522,GO:0048583,GO:0005575,GO:0005515,GO:0051716,GO:0023056,GO:0009967,GO:0010647,GO:0043067,GO:0042981,GO:0002252,GO:0006915,GO:0009966,GO:0012501,GO:0008219,GO:0016265,GO:0010941,GO:0023051,GO:0002250,GO:0005488,GO:0002443,GO:…	immune system process,immune response,extracellular region part,extracellular region,response to stimulus,vesicle,membrane-bounded vesicle,positive regulation of response to stimulus,extracellular vesicular exosome,extracellular organelle,extracellular membrane-bounded organelle,positive regulation of biological process,single-organism process,extracellular space,single-organism cellular process,…	ocu04142	Lysosome
ENSOCUT00000016964	ENSOCUG00000016959	AIM1L	13:138998476-139024339	0.577346	15.9758	-4.79031	5e-05	0.00164462	absent in melanoma 1-like [Source:HGNC Symbol;Acc:HGNC:17295]	--	--	--	--
ENSOCUT00000015721	ENSOCUG00000015723	SLC15A3	1:193550534-193575083	68.7506	14.1168	2.28396	5e-05	0.00164462	solute carrier family 15 member 3 [Source:HGNC Symbol;Acc:HGNC:18068]	GO:0005575,GO:0051179,GO:0005764,GO:0000323,GO:0005773,GO:0016020,GO:0016021,GO:0031224,GO:0044425,GO:0051234,GO:0006810,GO:0043226,GO:0008150,GO:0043227,GO:0005623,GO:0044464,GO:0005737,GO:0044437,GO:0005215,GO:0005765,GO:0003674,GO:0005774,GO:0044424,GO:0044422,GO:0044446,GO:0005622,GO:0043229,GO:0043231,GO:0044444,GO:0031090	cellular_component,localization,lysosome,lytic vacuole,vacuole,membrane,integral to membrane,intrinsic to membrane,membrane part,establishment of localization,transport,organelle,biological_process,membrane-bounded organelle,cell,cell part,cytoplasm,vacuolar part,transporter activity,lysosomal membrane,molecular_function,vacuolar membrane,intracellular part,organelle part,intracellular organelle …	--	--
ENSOCUT00000006202	ENSOCUG00000006204	UBASH3A	GL019577:8509-40083	0.414275	6.0297	-3.86343	5e-05	0.00164462	ubiquitin associated and SH3 domain containing A [Source:HGNC Symbol;Acc:HGNC:12462]	GO:0002376,GO:0006955,GO:0002682,GO:0044421,GO:0005576,GO:0002684,GO:0001816,GO:0001817,GO:0051239,GO:0050896,GO:0031982,GO:0031988,GO:0048584,GO:0050778,GO:0050776,GO:0070062,GO:0043230,GO:0065010,GO:0048518,GO:0044699,GO:0002764,GO:0002757,GO:0044763,GO:0002253,GO:0048583,GO:0005575,GO:0005515,GO:0048519,GO:0044707,GO:0002768,GO:0048523,GO:0050851,GO:0002429,GO:0032501,GO:0051716,GO:0009966,GO:…	immune system process,immune response,regulation of immune system process,extracellular region part,extracellular region,positive regulation of immune system process,cytokine production,regulation of cytokine production,regulation of multicellular organismal process,response to stimulus,vesicle,membrane-bounded vesicle,positive regulation of response to stimulus,positive regulation of immune resp…	--	--
ENSOCUT00000008066	ENSOCUG00000008068	BCHE	14:60405507-60483174	14.7817	107.479	-2.86217	5e-05	0.00164462	butyrylcholinesterase [Source:HGNC Symbol;Acc:HGNC:983]	GO:0044421,GO:0005576,GO:0005615,GO:0005575,GO:0005515,GO:0005488,GO:0016787,GO:0042802,GO:0043226,GO:0043227,GO:0005623,GO:0044464,GO:0005737,GO:0003990,GO:0005641,GO:0004104,GO:0003674,GO:0044424,GO:0044422,GO:0044446,GO:0005622,GO:0052689,GO:0005783,GO:0043229,GO:0003824,GO:0043231,GO:0016788,GO:0005634,GO:0044444,GO:0072562,GO:0031970,GO:0005635,GO:0031974,GO:0012505,GO:0044428,GO:0031975,GO:…	extracellular region part,extracellular region,extracellular space,cellular_component,protein binding,binding,hydrolase activity,identical protein binding,organelle,membrane-bounded organelle,cell,cell part,cytoplasm,acetylcholinesterase activity,nuclear envelope lumen,cholinesterase activity,molecular_function,intracellular part,organelle part,intracellular organelle part,intracellular,carboxyli…	--	--
ENSOCUT00000017819	ENSOCUG00000017821	GATA3	16:12445209-12466901	0.464158	8.86938	-4.25614	5e-05	0.00164462	GATA binding protein 3 [Source:HGNC Symbol;Acc:HGNC:4172]	GO:0002376,GO:0006955,GO:0045321,GO:0001775,GO:0002682,GO:0002684,GO:0046649,GO:0002521,GO:0050865,GO:0002694,GO:0002520,GO:0001816,GO:0042110,GO:0030097,GO:0048534,GO:0051249,GO:0006952,GO:0001817,GO:0051239,GO:0030098,GO:0051251,GO:0050896,GO:0002696,GO:0070887,GO:0050867,GO:0010033,GO:0050870,GO:0050863,GO:0006950,GO:0048584,GO:0048731,GO:0050778,GO:0050776,GO:0007275,GO:0046983,GO:0030217,GO:…	immune system process,immune response,leukocyte activation,cell activation,regulation of immune system process,positive regulation of immune system process,lymphocyte activation,leukocyte differentiation,regulation of cell activation,regulation of leukocyte activation,immune system development,cytokine production,T cell activation,hemopoiesis,hematopoietic or lymphoid organ development,regulation…	--	--
ENSOCUT00000017601	ENSOCUG00000006566	CYBB	X:23257097-23394436	69.6806	12.0605	2.53046	5e-05	0.00164462	cytochrome b-245 beta chain [Source:HGNC Symbol;Acc:HGNC:2578]	GO:0002376,GO:0006955,GO:0006952,GO:0046982,GO:0050896,GO:0031982,GO:0031988,GO:0006950,GO:0044459,GO:0046983,GO:0006954,GO:0009611,GO:0045087,GO:0005575,GO:0005515,GO:0071944,GO:0005886,GO:0005488,GO:0016020,GO:0016021,GO:0031224,GO:0044425,GO:0031410,GO:0016023,GO:0031226,GO:0030139,GO:0043226,GO:0008150,GO:0043168,GO:0043227,GO:0005887,GO:0005623,GO:0044464,GO:0072593,GO:0005737,GO:0044710,GO:…	immune system process,immune response,defense response,protein heterodimerization activity,response to stimulus,vesicle,membrane-bounded vesicle,response to stress,plasma membrane part,protein dimerization activity,inflammatory response,response to wounding,innate immune response,cellular_component,protein binding,cell periphery,plasma membrane,binding,membrane,integral to membrane,intrinsic to m…	ocu04145,ocu04380,ocu04066,ocu04670	Phagosome,Osteoclast differentiation,HIF-1 signaling pathway,Leukocyte transendothelial migration
ENSOCUT00000013398	ENSOCUG00000013367	COL11A1	13:61053456-61262810	12.3145	1.36005	3.17863	5e-05	0.00164462	collagen type XI alpha 1 chain [Source:HGNC Symbol;Acc:HGNC:2186]	GO:0044421,GO:0005576,GO:0050896,GO:0048731,GO:0007275,GO:0044699,GO:0048513,GO:0044767,GO:0048856,GO:0031012,GO:0044763,GO:0032502,GO:0009605,GO:0005575,GO:0005578,GO:0030154,GO:0044707,GO:0022610,GO:0032501,GO:0007155,GO:0048869,GO:0044420,GO:0005581,GO:0016337,GO:0005201,GO:0009653,GO:0035987,GO:0001706,GO:0030198,GO:0043062,GO:0072358,GO:0072359,GO:0007492,GO:0009888,GO:0048729,GO:0048646,GO:…	extracellular region part,extracellular region,response to stimulus,system development,multicellular organismal development,single-organism process,organ development,single-organism developmental process,anatomical structure development,extracellular matrix,single-organism cellular process,developmental process,response to external stimulus,cellular_component,proteinaceous extracellular matrix,ce…	ocu05146,ocu04512,ocu04151,ocu04974,ocu04510,ocu04611	Amoebiasis,ECM-receptor interaction,PI3K-Akt signaling pathway,Protein digestion and absorption,Focal adhesion,Platelet activation
ENSOCUT00000017229	ENSOCUG00000017233	HIST1H1D	12:10824318-10824981	107.04	762.896	-2.83333	5e-05	0.00164462	histone cluster 1, H1d [Source:HGNC Symbol;Acc:HGNC:4717]	GO:0000786,GO:0032993,GO:0044699,GO:0000785,GO:0044427,GO:0044763,GO:0005694,GO:0005575,GO:0005515,GO:0048519,GO:0048523,GO:0005488,GO:0043228,GO:0043232,GO:0065007,GO:0050794,GO:0050789,GO:0003677,GO:0018193,GO:0006323,GO:0071103,GO:0006259,GO:0016043,GO:0071840,GO:0006333,GO:0000228,GO:0031497,GO:0006334,GO:0043226,GO:0009892,GO:0008150,GO:0044454,GO:0065004,GO:0043227,GO:0003682,GO:0034728,GO:…	nucleosome,protein-DNA complex,single-organism process,chromatin,chromosomal part,single-organism cellular process,chromosome,cellular_component,protein binding,negative regulation of biological process,negative regulation of cellular process,binding,non-membrane-bounded organelle,intracellular non-membrane-bounded organelle,biological regulation,regulation of cellular process,regulation of biolo…	--	--
ENSOCUT00000007742	ENSOCUG00000007742	CD22	GL018786:239521-253417	13.5213	0.709053	4.25319	5e-05	0.00164462	CD22 molecule [Source:HGNC Symbol;Acc:HGNC:1643]	GO:0044421,GO:0005576,GO:0031982,GO:0031988,GO:0070062,GO:0043230,GO:0065010,GO:0005575,GO:0005515,GO:0005488,GO:0016020,GO:0016021,GO:0031224,GO:0044425,GO:0043226,GO:0043227,GO:0003674	extracellular region part,extracellular region,vesicle,membrane-bounded vesicle,extracellular vesicular exosome,extracellular organelle,extracellular membrane-bounded organelle,cellular_component,protein binding,binding,membrane,integral to membrane,intrinsic to membrane,membrane part,organelle,membrane-bounded organelle,molecular_function	ocu04640,ocu04514,ocu04662	Hematopoietic cell lineage,Cell adhesion molecules (CAMs),B cell receptor signaling pathway
ENSOCUT00000029849	ENSOCUG00000025798	-	13:34606056-34606998	0	4.75063	#NAME?	5e-05	0.00164462	--	GO:0050896,GO:0044699,GO:0044763,GO:0005575,GO:0042221,GO:0044707,GO:0071944,GO:0032501,GO:0051716,GO:0005886,GO:0016020,GO:0065007,GO:0016021,GO:0031224,GO:0050794,GO:0007165,GO:0050789,GO:0044425,GO:0007154,GO:0044700,GO:0023052,GO:0007166,GO:0008150,GO:0005623,GO:0044464,GO:0009987,GO:0003674,GO:0004872,GO:0004871,GO:0060089,GO:0038023,GO:0004888,GO:0003008,GO:0007186,GO:0050877,GO:0051606,GO:…	response to stimulus,single-organism process,single-organism cellular process,cellular_component,response to chemical stimulus,single-multicellular organism process,cell periphery,multicellular organismal process,cellular response to stimulus,plasma membrane,membrane,biological regulation,integral to membrane,intrinsic to membrane,regulation of cellular process,signal transduction,regulation of b…	ocu04740	Olfactory transduction
ENSOCUT00000027440	ENSOCUG00000025119	RELT	1:143095559-143103195	0.481766	3.56288	-2.88664	5e-05	0.00164462	RELT tumor necrosis factor receptor [Source:HGNC Symbol;Acc:HGNC:13764]	GO:0044421,GO:0005576,GO:0031982,GO:0031988,GO:0070062,GO:0043230,GO:0065010,GO:0005575,GO:0016020,GO:0016021,GO:0031224,GO:0044425,GO:0043226,GO:0043227	extracellular region part,extracellular region,vesicle,membrane-bounded vesicle,extracellular vesicular exosome,extracellular organelle,extracellular membrane-bounded organelle,cellular_component,membrane,integral to membrane,intrinsic to membrane,membrane part,organelle,membrane-bounded organelle	ocu04060	Cytokine-cytokine receptor interaction
ENSOCUT00000016515	ENSOCUG00000016513	TBC1D2	1:14884893-14934177	6.75166	0.887263	2.92781	5e-05	0.00164462	TBC1 domain family member 2 [Source:HGNC Symbol;Acc:HGNC:18026]	GO:0031982,GO:0005575,GO:0005515,GO:0005488,GO:0065007,GO:0044093,GO:0050839,GO:0050794,GO:0050789,GO:0065009,GO:0031410,GO:0043085,GO:0030054,GO:0051174,GO:0019220,GO:0050790,GO:0043226,GO:0006793,GO:0008150,GO:0006796,GO:0005623,GO:0044464,GO:0051336,GO:0005737,GO:0044710,GO:0009987,GO:0045296,GO:0080090,GO:1901565,GO:0019222,GO:0003674,GO:0031323,GO:0051345,GO:0008047,GO:0009894,GO:1901575,GO:…	vesicle,cellular_component,protein binding,binding,biological regulation,positive regulation of molecular function,cell adhesion molecule binding,regulation of cellular process,regulation of biological process,regulation of molecular function,cytoplasmic vesicle,positive regulation of catalytic activity,cell junction,regulation of phosphorus metabolic process,regulation of phosphate metabolic pro…	--	--
ENSOCUT00000001178	ENSOCUG00000001177	-	GL018729:49291-84807	15.1976	3.62132	2.06926	5e-05	0.00164462	--	GO:0005575,GO:0016020,GO:0016021,GO:0031224,GO:0044425	cellular_component,membrane,integral to membrane,intrinsic to membrane,membrane part	ocu04060,ocu05152,ocu05145,ocu04630,ocu05169	Cytokine-cytokine receptor interaction,Tuberculosis,Toxoplasmosis,Jak-STAT signaling pathway,Epstein-Barr virus infection
ENSOCUT00000000705	ENSOCUG00000000699	CENPE	15:46423571-46506024	2.4574	12.1307	-2.30346	5e-05	0.00164462	centromere protein E [Source:HGNC Symbol;Acc:HGNC:1856]	GO:0048518,GO:0044699,GO:0044427,GO:0044763,GO:0048522,GO:0005694,GO:0005575,GO:0005515,GO:0051179,GO:0006928,GO:0000278,GO:0007059,GO:0006468,GO:0005488,GO:0022402,GO:0007049,GO:0016020,GO:0000280,GO:0007067,GO:0007346,GO:0043228,GO:0043232,GO:0065007,GO:0044093,GO:0050794,GO:0005856,GO:0000779,GO:0000793,GO:0045860,GO:0051247,GO:0051726,GO:0050789,GO:0051347,GO:0051234,GO:0033674,GO:0065009,GO:…	positive regulation of biological process,single-organism process,chromosomal part,single-organism cellular process,positive regulation of cellular process,chromosome,cellular_component,protein binding,localization,cellular component movement,mitotic cell cycle,chromosome segregation,protein phosphorylation,binding,cell cycle process,cell cycle,membrane,nuclear division,mitosis,regulation of mito…	--	--
ENSOCUT00000008157	ENSOCUG00000008159	CD27	8:32506939-32513335	1.40659	43.588	-4.95366	5e-05	0.00164462	CD27 molecule [Source:HGNC Symbol;Acc:HGNC:11922]	GO:0044421,GO:0005576,GO:0009986,GO:0050896,GO:0031982,GO:0031988,GO:0006950,GO:0048584,GO:0044459,GO:0070062,GO:0043230,GO:0065010,GO:0048518,GO:0044699,GO:0044763,GO:0009897,GO:0048522,GO:0048583,GO:0005575,GO:0005515,GO:0048519,GO:0048523,GO:0071944,GO:0051716,GO:0023056,GO:0009967,GO:0010647,GO:0007243,GO:0005886,GO:0043067,GO:0042981,GO:0010740,GO:0006915,GO:0009966,GO:0010627,GO:0012501,GO:…	extracellular region part,extracellular region,cell surface,response to stimulus,vesicle,membrane-bounded vesicle,response to stress,positive regulation of response to stimulus,plasma membrane part,extracellular vesicular exosome,extracellular organelle,extracellular membrane-bounded organelle,positive regulation of biological process,single-organism process,single-organism cellular process,exter…	ocu04060	Cytokine-cytokine receptor interaction
ENSOCUT00000021217	ENSOCUG00000024543	HIST2H2BF	13:42189835-42190216	138.465	1008.91	-2.86521	5e-05	0.00164462	histone cluster 2, H2bf [Source:HGNC Symbol;Acc:HGNC:24700]	GO:0000786,GO:0032993,GO:0044421,GO:0005576,GO:0046982,GO:0031982,GO:0031988,GO:0046983,GO:0070062,GO:0043230,GO:0065010,GO:0000785,GO:0044427,GO:0005694,GO:0005575,GO:0005515,GO:0005488,GO:0043228,GO:0043232,GO:0003677,GO:0043226,GO:0043227,GO:0005623,GO:0044464,GO:0005737,GO:0003674,GO:0044424,GO:0044422,GO:0044446,GO:0005622,GO:0032991,GO:0043229,GO:0043231,GO:0005634,GO:1901363,GO:0097159,GO:…	nucleosome,protein-DNA complex,extracellular region part,extracellular region,protein heterodimerization activity,vesicle,membrane-bounded vesicle,protein dimerization activity,extracellular vesicular exosome,extracellular organelle,extracellular membrane-bounded organelle,chromatin,chromosomal part,chromosome,cellular_component,protein binding,binding,non-membrane-bounded organelle,intracellular…	ocu05322,ocu05034,ocu05203	Systemic lupus erythematosus,Alcoholism,Viral carcinogenesis
ENSOCUT00000030987	ENSOCUG00000028089	-	12:10794453-10794834	89.7294	770.29	-3.10175	5e-05	0.00164462	--	GO:0000786,GO:0032993,GO:0046982,GO:0046983,GO:0000785,GO:0044427,GO:0005694,GO:0005575,GO:0005515,GO:0005488,GO:0043228,GO:0043232,GO:0003677,GO:0043226,GO:0043227,GO:0005623,GO:0044464,GO:0003674,GO:0044424,GO:0044422,GO:0044446,GO:0005622,GO:0032991,GO:0043229,GO:0043231,GO:0005634,GO:1901363,GO:0097159,GO:0003676	nucleosome,protein-DNA complex,protein heterodimerization activity,protein dimerization activity,chromatin,chromosomal part,chromosome,cellular_component,protein binding,binding,non-membrane-bounded organelle,intracellular non-membrane-bounded organelle,DNA binding,organelle,membrane-bounded organelle,cell,cell part,molecular_function,intracellular part,organelle part,intracellular organelle part…	ocu05322,ocu05034,ocu05203	Systemic lupus erythematosus,Alcoholism,Viral carcinogenesis
ENSOCUT00000033219	ENSOCUG00000029622	-	13:35714065-35746533	25.2701	7.95513	1.66747	5e-05	0.00164462	--	GO:0005575,GO:0016020,GO:0016021,GO:0031224,GO:0044425	cellular_component,membrane,integral to membrane,intrinsic to membrane,membrane part	--	--
ENSOCUT00000004868	ENSOCUG00000004870	IL1RAP	14:86228471-86363214	18.8975	5.06126	1.90062	5e-05	0.00164462	interleukin 1 receptor accessory protein [Source:HGNC Symbol;Acc:HGNC:5995]	GO:0001816,GO:0001817,GO:0051239,GO:0050896,GO:0070887,GO:0010033,GO:0048731,GO:0007275,GO:0048518,GO:0044699,GO:0044767,GO:0034097,GO:0048856,GO:0044763,GO:0048522,GO:0032502,GO:2000026,GO:0005575,GO:0005515,GO:0009306,GO:0042221,GO:0071310,GO:0071345,GO:0051179,GO:0030154,GO:0032940,GO:0044707,GO:0032879,GO:0001819,GO:0051094,GO:0032501,GO:0050663,GO:0051716,GO:0050708,GO:0050793,GO:0048869,GO:…	cytokine production,regulation of cytokine production,regulation of multicellular organismal process,response to stimulus,cellular response to chemical stimulus,response to organic substance,system development,multicellular organismal development,positive regulation of biological process,single-organism process,single-organism developmental process,response to cytokine stimulus,anatomical structu…	ocu04060,ocu04750,ocu04210	Cytokine-cytokine receptor interaction,Inflammatory mediator regulation of TRP channels,Apoptosis
ENSOCUT00000022494	ENSOCUG00000002898	FBLN7	2:97078338-97127099	88.8561	4.66198	4.25246	5e-05	0.00164462	fibulin 7 [Source:HGNC Symbol;Acc:HGNC:26740]	GO:0044421,GO:0005576,GO:0031982,GO:0031988,GO:0070062,GO:0043230,GO:0065010,GO:0005575,GO:0005509,GO:0005488,GO:0030054,GO:0070161,GO:0043226,GO:0043227,GO:0005912,GO:0030055,GO:0005925,GO:0005924,GO:0043167,GO:0003674,GO:0046872,GO:0043169	extracellular region part,extracellular region,vesicle,membrane-bounded vesicle,extracellular vesicular exosome,extracellular organelle,extracellular membrane-bounded organelle,cellular_component,calcium ion binding,binding,cell junction,anchoring junction,organelle,membrane-bounded organelle,adherens junction,cell-substrate junction,focal adhesion,cell-substrate adherens junction,ion binding,mol…	--	--
ENSOCUT00000012335	ENSOCUG00000012339	PEG3	GL018811:619890-636674	2.03346	7.37299	-1.85832	5e-05	0.00164462	paternally expressed 3 [Source:HGNC Symbol;Acc:HGNC:8826]	GO:0048518,GO:0048522,GO:0005575,GO:0048519,GO:0048523,GO:0005488,GO:0005773,GO:0065007,GO:0050794,GO:0050789,GO:0009893,GO:0043226,GO:0009892,GO:0008150,GO:0043227,GO:0031325,GO:0010605,GO:0010604,GO:0031324,GO:0005623,GO:0044464,GO:0005737,GO:0009987,GO:0010629,GO:0031327,GO:0080090,GO:0045892,GO:0009890,GO:0000122,GO:0043167,GO:0019222,GO:0003674,GO:0031323,GO:0010558,GO:0051172,GO:0051253,GO:…	positive regulation of biological process,positive regulation of cellular process,cellular_component,negative regulation of biological process,negative regulation of cellular process,binding,vacuole,biological regulation,regulation of cellular process,regulation of biological process,positive regulation of metabolic process,organelle,negative regulation of metabolic process,biological_process,mem…	--	--
ENSOCUT00000010189	ENSOCUG00000010189	OB	7:16060258-16081777	1.60195	8.12172	-2.34196	5e-05	0.00164462	leptin [Source:HGNC Symbol;Acc:HGNC:6553]	GO:0002376,GO:0006955,GO:0045321,GO:0001775,GO:0002682,GO:0044421,GO:0005576,GO:0002684,GO:0046649,GO:0002521,GO:0050865,GO:0002694,GO:0002520,GO:0001816,GO:0042110,GO:0030097,GO:0048534,GO:0051249,GO:0006952,GO:0001817,GO:0051239,GO:0030098,GO:0051251,GO:0050896,GO:0002696,GO:0070887,GO:0050867,GO:0010033,GO:0050870,GO:0050863,GO:0006950,GO:0048584,GO:0048731,GO:0050776,GO:0007275,GO:0030217,GO:…	immune system process,immune response,leukocyte activation,cell activation,regulation of immune system process,extracellular region part,extracellular region,positive regulation of immune system process,lymphocyte activation,leukocyte differentiation,regulation of cell activation,regulation of leukocyte activation,immune system development,cytokine production,T cell activation,hemopoiesis,hematop…	ocu04060,ocu04630,ocu04152,ocu04080,ocu04920,ocu04932	Cytokine-cytokine receptor interaction,Jak-STAT signaling pathway,AMPK signaling pathway,Neuroactive ligand-receptor interaction,Adipocytokine signaling pathway,Non-alcoholic fatty liver disease (NAFLD)
ENSOCUT00000025870	ENSOCUG00000006579	SPHK1	GL018843:343360-347877	11.5683	1.19005	3.28108	5e-05	0.00164462	sphingosine kinase 1 [Source:HGNC Symbol;Acc:HGNC:11240]	GO:0001816,GO:0006952,GO:0001817,GO:0051239,GO:0050896,GO:0070887,GO:0010033,GO:0006950,GO:0048731,GO:0007275,GO:0006954,GO:0048518,GO:0044699,GO:0009611,GO:0048513,GO:0044767,GO:0034097,GO:0048856,GO:0040017,GO:0044763,GO:0051272,GO:0016477,GO:0048522,GO:0048583,GO:0030335,GO:0032502,GO:2000026,GO:0005575,GO:2000147,GO:0008283,GO:0005515,GO:0040011,GO:0042221,GO:0071310,GO:0071345,GO:0048870,GO:…	cytokine production,defense response,regulation of cytokine production,regulation of multicellular organismal process,response to stimulus,cellular response to chemical stimulus,response to organic substance,response to stress,system development,multicellular organismal development,inflammatory response,positive regulation of biological process,single-organism process,response to wounding,organ d…	ocu05152,ocu00600,ocu04666,ocu04370,ocu04020,ocu04071,ocu01100	Tuberculosis,Sphingolipid metabolism,Fc gamma R-mediated phagocytosis,VEGF signaling pathway,Calcium signaling pathway,Sphingolipid signaling pathway,Metabolic pathways
ENSOCUT00000023524	ENSOCUG00000023091	PKIB	12:111823778-111858643	106.041	17.3986	2.60758	5e-05	0.00164462	protein kinase (cAMP-dependent, catalytic) inhibitor beta [Source:HGNC Symbol;Acc:HGNC:9018]	GO:0048518,GO:0044699,GO:0044763,GO:0048522,GO:0048519,GO:0048523,GO:0006468,GO:0065007,GO:0044093,GO:0050794,GO:0050789,GO:0051347,GO:0065009,GO:0016310,GO:0031399,GO:0001932,GO:0051246,GO:0042325,GO:0045859,GO:0043085,GO:0032268,GO:0043549,GO:0006259,GO:0071900,GO:0051338,GO:0016043,GO:0051174,GO:0019220,GO:0065008,GO:0050790,GO:0071840,GO:0006260,GO:0009893,GO:0006793,GO:0009892,GO:0008150,GO:…	positive regulation of biological process,single-organism process,single-organism cellular process,positive regulation of cellular process,negative regulation of biological process,negative regulation of cellular process,protein phosphorylation,biological regulation,positive regulation of molecular function,regulation of cellular process,regulation of biological process,positive regulation of tra…	--	--
ENSOCUT00000027991	ENSOCUG00000017438	SELE	13:21849962-21860289	132.127	5.36333	4.62265	5e-05	0.00164462	E-selectin precursor [Source:RefSeq peptide;Acc:NP_001075781]	GO:0002376,GO:0044421,GO:0005576,GO:0050896,GO:0010033,GO:0044459,GO:0048518,GO:0044699,GO:0005615,GO:0034097,GO:0044763,GO:0016477,GO:0048522,GO:0005575,GO:0005515,GO:0040011,GO:0042221,GO:0048870,GO:0051674,GO:0051179,GO:0050900,GO:0006928,GO:0032879,GO:0071944,GO:0022610,GO:0051716,GO:0005886,GO:0007155,GO:0045123,GO:0097367,GO:0005488,GO:0051049,GO:0051050,GO:0016020,GO:0043228,GO:0043232,GO:…	immune system process,extracellular region part,extracellular region,response to stimulus,response to organic substance,plasma membrane part,positive regulation of biological process,single-organism process,extracellular space,response to cytokine stimulus,single-organism cellular process,cell migration,positive regulation of cellular process,cellular_component,protein binding,locomotion,response…	ocu04514,ocu05144,ocu05143,ocu04668	Cell adhesion molecules (CAMs),Malaria,African trypanosomiasis,TNF signaling pathway
ENSOCUT00000027993	ENSOCUG00000022308	ABCG1	GL019290:47522-89097	27.1928	4.81183	2.49856	5e-05	0.00164462	ATP binding cassette subfamily G member 1 [Source:HGNC Symbol;Acc:HGNC:73]	GO:0009986,GO:0046982,GO:0050896,GO:0010033,GO:0044459,GO:0046983,GO:0048518,GO:0044699,GO:0044763,GO:0009897,GO:0005575,GO:0005515,GO:0042221,GO:0048519,GO:0051179,GO:0044707,GO:0032879,GO:0071944,GO:0032501,GO:0005886,GO:0033993,GO:0005488,GO:0051049,GO:0051050,GO:0016020,GO:0065007,GO:0016021,GO:0044765,GO:0031224,GO:0010876,GO:0050794,GO:0019915,GO:0050789,GO:0044425,GO:0051234,GO:0009719,GO:…	cell surface,protein heterodimerization activity,response to stimulus,response to organic substance,plasma membrane part,protein dimerization activity,positive regulation of biological process,single-organism process,single-organism cellular process,external side of plasma membrane,cellular_component,protein binding,response to chemical stimulus,negative regulation of biological process,localizat…	ocu02010	ABC transporters
ENSOCUT00000003785	ENSOCUG00000003786	-	4:36519030-36533748	0	1.30448	#NAME?	5e-05	0.00164462	--	GO:0005575,GO:0043228,GO:0043232,GO:0005856,GO:0044430,GO:0043226,GO:0005882,GO:0005623,GO:0044464,GO:0045111,GO:0003674,GO:0044424,GO:0045095,GO:0044422,GO:0044446,GO:0005622,GO:0032991,GO:0043229,GO:0043234,GO:0005198	cellular_component,non-membrane-bounded organelle,intracellular non-membrane-bounded organelle,cytoskeleton,cytoskeletal part,organelle,intermediate filament,cell,cell part,intermediate filament cytoskeleton,molecular_function,intracellular part,keratin filament,organelle part,intracellular organelle part,intracellular,macromolecular complex,intracellular organelle,protein complex,structural mole…	--	--
ENSOCUT00000001787	ENSOCUG00000001788	RASGRP1	17:33577342-33651690	1.95915	41.976	-4.42127	5e-05	0.00164462	RAS guanyl releasing protein 1 [Source:HGNC Symbol;Acc:HGNC:9878]	GO:0002376,GO:0006955,GO:0045321,GO:0001775,GO:0002682,GO:0002684,GO:0046649,GO:0002521,GO:0050865,GO:0002694,GO:0002520,GO:0001816,GO:0042110,GO:0030097,GO:0048534,GO:0051249,GO:0006952,GO:0001817,GO:0051239,GO:0030098,GO:0051251,GO:0050896,GO:0002696,GO:0050867,GO:0050870,GO:0050863,GO:0006950,GO:0048584,GO:0048731,GO:0050778,GO:0050776,GO:0007275,GO:0046983,GO:0030217,GO:0006954,GO:0048518,GO:…	immune system process,immune response,leukocyte activation,cell activation,regulation of immune system process,positive regulation of immune system process,lymphocyte activation,leukocyte differentiation,regulation of cell activation,regulation of leukocyte activation,immune system development,cytokine production,T cell activation,hemopoiesis,hematopoietic or lymphoid organ development,regulation…	ocu04660,ocu04611,ocu05200,ocu04010,ocu04014	T cell receptor signaling pathway,Platelet activation,Pathways in cancer,MAPK signaling pathway,Ras signaling pathway
ENSOCUT00000007175	ENSOCUG00000007174	SATB1	14:4366825-4440070	5.58261	255.785	-5.51785	5e-05	0.00164462	SATB homeobox 1 [Source:HGNC Symbol;Acc:HGNC:10541]	GO:0002376,GO:0045321,GO:0001775,GO:0046649,GO:0002521,GO:0002520,GO:0042110,GO:0030097,GO:0048534,GO:0030098,GO:0050896,GO:0048731,GO:0007275,GO:0030217,GO:0044699,GO:0046651,GO:0032943,GO:0070661,GO:0048513,GO:0044767,GO:0000785,GO:0048856,GO:0044427,GO:0044763,GO:0005694,GO:0032502,GO:0009605,GO:0005575,GO:0008283,GO:0005515,GO:0048519,GO:0030154,GO:0044707,GO:0048523,GO:0042098,GO:0032501,GO:…	immune system process,leukocyte activation,cell activation,lymphocyte activation,leukocyte differentiation,immune system development,T cell activation,hemopoiesis,hematopoietic or lymphoid organ development,lymphocyte differentiation,response to stimulus,system development,multicellular organismal development,T cell differentiation,single-organism process,lymphocyte proliferation,mononuclear cell…	--	--
ENSOCUT00000004034	ENSOCUG00000004035	IRF6	16:62863161-62886835	0.425003	5.33895	-3.65101	5e-05	0.00164462	interferon regulatory factor 6 [Source:HGNC Symbol;Acc:HGNC:6121]	GO:0044421,GO:0005576,GO:0031982,GO:0031988,GO:0048731,GO:0007275,GO:0070062,GO:0043230,GO:0065010,GO:0048518,GO:0044699,GO:0048513,GO:0044767,GO:0048856,GO:0044763,GO:0048522,GO:0032502,GO:0005575,GO:0008283,GO:0005515,GO:0048519,GO:0030154,GO:0042127,GO:0044707,GO:0048523,GO:0032501,GO:0048869,GO:0005488,GO:0022402,GO:0007049,GO:0016020,GO:0065007,GO:0016021,GO:0031224,GO:0050794,GO:0051726,GO:…	extracellular region part,extracellular region,vesicle,membrane-bounded vesicle,system development,multicellular organismal development,extracellular vesicular exosome,extracellular organelle,extracellular membrane-bounded organelle,positive regulation of biological process,single-organism process,organ development,single-organism developmental process,anatomical structure development,single-orga…	--	--
ENSOCUT00000005262	ENSOCUG00000005263	TOX	3:74291086-74624995	1.30985	21.4453	-4.03319	5e-05	0.00164462	thymocyte selection associated high mobility group box [Source:HGNC Symbol;Acc:HGNC:18988]	--	--	--	--
ENSOCUT00000007741	ENSOCUG00000007735	FREM2	GL018719:1688315-1901886	3.90063	0.391686	3.31594	5e-05	0.00164462	FRAS1 related extracellular matrix protein 2 [Source:HGNC Symbol;Acc:HGNC:25396]	GO:0044421,GO:0005576,GO:0031982,GO:0031988,GO:0048731,GO:0007275,GO:0070062,GO:0043230,GO:0065010,GO:0044699,GO:0048513,GO:0044767,GO:0048856,GO:0031012,GO:0044763,GO:0032502,GO:0005575,GO:0005578,GO:0044707,GO:0032501,GO:0044420,GO:0016020,GO:0016021,GO:0031224,GO:0044425,GO:0009653,GO:0072358,GO:0072359,GO:0007154,GO:0009888,GO:0048729,GO:0002009,GO:0005604,GO:0043226,GO:0060429,GO:0008150,GO:…	extracellular region part,extracellular region,vesicle,membrane-bounded vesicle,system development,multicellular organismal development,extracellular vesicular exosome,extracellular organelle,extracellular membrane-bounded organelle,single-organism process,organ development,single-organism developmental process,anatomical structure development,extracellular matrix,single-organism cellular process…	--	--
ENSOCUT00000016466	ENSOCUG00000016469	MLANA	1:48271765-48305006	128.657	8.29965	3.95434	5e-05	0.00164462	melan-A [Source:HGNC Symbol;Acc:HGNC:7124]	GO:0031982,GO:0031988,GO:0005575,GO:0005515,GO:0005488,GO:0016020,GO:0016021,GO:0031224,GO:0044425,GO:0031410,GO:0016023,GO:0043226,GO:0043227,GO:0042470,GO:0048770,GO:0005623,GO:0044464,GO:0005737,GO:0003674,GO:0044424,GO:0044422,GO:0044446,GO:0005622,GO:0005802,GO:0005783,GO:0043229,GO:0043231,GO:0005794,GO:0044444,GO:0005789,GO:0012505,GO:0042175,GO:0044432,GO:0031090	vesicle,membrane-bounded vesicle,cellular_component,protein binding,binding,membrane,integral to membrane,intrinsic to membrane,membrane part,cytoplasmic vesicle,cytoplasmic membrane-bounded vesicle,organelle,membrane-bounded organelle,melanosome,pigment granule,cell,cell part,cytoplasm,molecular_function,intracellular part,organelle part,intracellular organelle part,intracellular,trans-Golgi net…	--	--
ENSOCUT00000029180	ENSOCUG00000022167	C5AR1	GL018835:582475-583528	81.0246	10.2166	2.98745	5e-05	0.00164462	complement component 5a receptor 1 [Source:HGNC Symbol;Acc:HGNC:1338]	GO:0002376,GO:0002682,GO:0002684,GO:0001816,GO:0006952,GO:0001817,GO:0051239,GO:0050896,GO:0070887,GO:0002237,GO:0010033,GO:0006950,GO:0048584,GO:0009617,GO:0048731,GO:0044459,GO:0007275,GO:0048518,GO:0044699,GO:0060326,GO:0051707,GO:0044767,GO:0048856,GO:0009607,GO:0040017,GO:0044763,GO:0051272,GO:0016477,GO:0048522,GO:0048583,GO:0030335,GO:0032502,GO:0009605,GO:2000026,GO:0005575,GO:2000147,GO:…	immune system process,regulation of immune system process,positive regulation of immune system process,cytokine production,defense response,regulation of cytokine production,regulation of multicellular organismal process,response to stimulus,cellular response to chemical stimulus,response to molecule of bacterial origin,response to organic substance,response to stress,positive regulation of respo…	ocu05150,ocu04610,ocu04080	Staphylococcus aureus infection,Complement and coagulation cascades,Neuroactive ligand-receptor interaction
ENSOCUT00000006452	ENSOCUG00000006444	CD109	12:60546041-60712350	38.5369	10.2273	1.91381	5e-05	0.00164462	CD109 molecule [Source:HGNC Symbol;Acc:HGNC:21685]	GO:0002376,GO:0044421,GO:0005576,GO:0002521,GO:0002520,GO:0030097,GO:0048534,GO:0009986,GO:0051239,GO:0050896,GO:0070887,GO:0010033,GO:0006950,GO:0048731,GO:0007275,GO:0044699,GO:0009611,GO:0048513,GO:0005615,GO:0044767,GO:0048856,GO:0044763,GO:0048583,GO:0032502,GO:0009605,GO:2000026,GO:0005575,GO:0008283,GO:0005515,GO:0042221,GO:0071310,GO:0048519,GO:0030154,GO:0042127,GO:0044707,GO:0048523,GO:…	immune system process,extracellular region part,extracellular region,leukocyte differentiation,immune system development,hemopoiesis,hematopoietic or lymphoid organ development,cell surface,regulation of multicellular organismal process,response to stimulus,cellular response to chemical stimulus,response to organic substance,response to stress,system development,multicellular organismal developme…	--	--
ENSOCUT00000021409	ENSOCUG00000023623	-	17:42028862-42029457	0	8.51155	#NAME?	5e-05	0.00164462	--	--	--	--	--
ENSOCUT00000000113	ENSOCUG00000000114	DUSP2	2:95158063-95160100	3.63727	24.7679	-2.76755	5e-05	0.00164462	dual specificity phosphatase 2 [Source:HGNC Symbol;Acc:HGNC:3068]	GO:0050896,GO:0044699,GO:0044763,GO:0048583,GO:0005515,GO:0048519,GO:0048523,GO:0051716,GO:0007243,GO:0009966,GO:0010627,GO:0006468,GO:0023051,GO:0005488,GO:0000165,GO:0010646,GO:0043408,GO:0048585,GO:0065007,GO:0050794,GO:0035556,GO:0007165,GO:0050789,GO:0065009,GO:0016310,GO:0031399,GO:0001932,GO:0051246,GO:0042325,GO:0009968,GO:0007154,GO:0045859,GO:0044700,GO:0023057,GO:0019900,GO:0023052,GO:…	response to stimulus,single-organism process,single-organism cellular process,regulation of response to stimulus,protein binding,negative regulation of biological process,negative regulation of cellular process,cellular response to stimulus,intracellular protein kinase cascade,regulation of signal transduction,regulation of intracellular protein kinase cascade,protein phosphorylation,regulation o…	ocu04010	MAPK signaling pathway
ENSOCUT00000002941	ENSOCUG00000002945	MEOX1	19:44102237-44118149	7.92235	1.46544	2.4346	5e-05	0.00164462	mesenchyme homeobox 1 [Source:HGNC Symbol;Acc:HGNC:7013]	GO:0007275,GO:0048518,GO:0044699,GO:0044767,GO:0048856,GO:0048522,GO:0032502,GO:0005575,GO:0005515,GO:0044707,GO:0032501,GO:0005488,GO:0065007,GO:0050794,GO:0050789,GO:0009653,GO:0003677,GO:0048646,GO:0019904,GO:0009893,GO:0043226,GO:0008150,GO:0043227,GO:0031325,GO:0003682,GO:0010604,GO:0005623,GO:0044464,GO:0071837,GO:0000982,GO:0005737,GO:0007379,GO:0009987,GO:0000981,GO:0001047,GO:0080090,GO:…	multicellular organismal development,positive regulation of biological process,single-organism process,single-organism developmental process,anatomical structure development,positive regulation of cellular process,developmental process,cellular_component,protein binding,single-multicellular organism process,multicellular organismal process,binding,biological regulation,regulation of cellular proc…	--	--
ENSOCUT00000017674	ENSOCUG00000025918	HIST2H2AA4	13:42158888-42159281	718.055	3039.73	-2.08178	5e-05	0.00164462	histone cluster 2, H2aa3 [Source:HGNC Symbol;Acc:HGNC:4736]	GO:0000786,GO:0032993,GO:0044421,GO:0005576,GO:0046982,GO:0031982,GO:0031988,GO:0046983,GO:0070062,GO:0043230,GO:0065010,GO:0000785,GO:0044427,GO:0005694,GO:0005575,GO:0005515,GO:0005488,GO:0043228,GO:0043232,GO:0003677,GO:0043226,GO:0043227,GO:0005623,GO:0044464,GO:0003674,GO:0044424,GO:0044422,GO:0044446,GO:0005622,GO:0032991,GO:0043229,GO:0043231,GO:0005634,GO:1901363,GO:0097159,GO:0003676	nucleosome,protein-DNA complex,extracellular region part,extracellular region,protein heterodimerization activity,vesicle,membrane-bounded vesicle,protein dimerization activity,extracellular vesicular exosome,extracellular organelle,extracellular membrane-bounded organelle,chromatin,chromosomal part,chromosome,cellular_component,protein binding,binding,non-membrane-bounded organelle,intracellular…	ocu05322,ocu05034	Systemic lupus erythematosus,Alcoholism
ENSOCUT00000010370	ENSOCUG00000010366	TMPRSS13	GL018782:39320-67941	0.268186	3.74332	-3.80301	5e-05	0.00164462	transmembrane protease, serine 13 [Source:HGNC Symbol;Acc:HGNC:29808]	GO:0005575,GO:0051179,GO:0016020,GO:0016021,GO:0006897,GO:0031224,GO:0044425,GO:0051234,GO:0006810,GO:0038024,GO:0016787,GO:0004175,GO:0008233,GO:0006898,GO:0017171,GO:0070011,GO:0005044,GO:0008236,GO:0008150,GO:0016192,GO:0004252,GO:0006508,GO:0003674,GO:0004872,GO:0019538,GO:0003824,GO:0044238,GO:0071704,GO:0043170,GO:0008152	cellular_component,localization,membrane,integral to membrane,endocytosis,intrinsic to membrane,membrane part,establishment of localization,transport,cargo receptor activity,hydrolase activity,endopeptidase activity,peptidase activity,receptor-mediated endocytosis,serine hydrolase activity,peptidase activity, acting on L-amino acid peptides,scavenger receptor activity,serine-type peptidase activi…	ocu05164	Influenza A
ENSOCUT00000012429	ENSOCUG00000012432	HS3ST3B1	19:5502985-5548874	1.64078	14.2741	-3.12095	5e-05	0.00164462	heparan sulfate-glucosamine 3-sulfotransferase 3B1 [Source:HGNC Symbol;Acc:HGNC:5198]	GO:0003674,GO:0003824,GO:0008146,GO:0016782,GO:0016740	molecular_function,catalytic activity,sulfotransferase activity,transferase activity, transferring sulfur-containing groups,transferase activity	ocu00534	Glycosaminoglycan biosynthesis - heparan sulfate / heparin
ENSOCUT00000009288	ENSOCUG00000009279	ABCA1	1:8128275-8262632	299.679	61.3134	2.28914	5e-05	0.00164462	ATP binding cassette subfamily A member 1 [Source:HGNC Symbol;Acc:HGNC:29]	GO:0001816,GO:0009986,GO:0050896,GO:0070887,GO:0002237,GO:0010033,GO:0031982,GO:0031988,GO:0006950,GO:0009617,GO:0044459,GO:0032496,GO:0048518,GO:0044699,GO:0051707,GO:0071219,GO:0009607,GO:0044763,GO:0009897,GO:0048522,GO:0071216,GO:0048583,GO:0005575,GO:0005515,GO:0009306,GO:0042221,GO:0071222,GO:0071310,GO:0051179,GO:1901700,GO:0032940,GO:0044707,GO:0051704,GO:0032879,GO:0071944,GO:0032501,GO:…	cytokine production,cell surface,response to stimulus,cellular response to chemical stimulus,response to molecule of bacterial origin,response to organic substance,vesicle,membrane-bounded vesicle,response to stress,response to bacterium,plasma membrane part,response to lipopolysaccharide,positive regulation of biological process,single-organism process,response to other organism,cellular respons…	ocu02010,ocu04975	ABC transporters,Fat digestion and absorption
ENSOCUT00000028143	ENSOCUG00000027745	ICAM3	GL018833:59105-63719	2.53959	53.4139	-4.39455	5e-05	0.00164462	intercellular adhesion molecule 3 [Source:HGNC Symbol;Acc:HGNC:5346]	GO:0044421,GO:0005576,GO:0031982,GO:0031988,GO:0070062,GO:0043230,GO:0065010,GO:0044699,GO:0044763,GO:0005575,GO:0005515,GO:0022610,GO:0007155,GO:0005102,GO:0005488,GO:0016020,GO:0005178,GO:0016337,GO:0016021,GO:0031224,GO:0044425,GO:0043226,GO:0008150,GO:0043227,GO:0032403,GO:0009987,GO:0003674	extracellular region part,extracellular region,vesicle,membrane-bounded vesicle,extracellular vesicular exosome,extracellular organelle,extracellular membrane-bounded organelle,single-organism process,single-organism cellular process,cellular_component,protein binding,biological adhesion,cell adhesion,receptor binding,binding,membrane,integrin binding,cell-cell adhesion,integral to membrane,intri…	ocu04514	Cell adhesion molecules (CAMs)
ENSOCUT00000012227	ENSOCUG00000012227	CD226	9:110000418-110100277	2.67985	20.6544	-2.94623	5e-05	0.00164462	CD226 molecule [Source:HGNC Symbol;Acc:HGNC:16961]	GO:0002376,GO:0006955,GO:0045321,GO:0001775,GO:0002682,GO:0002684,GO:0050865,GO:0002694,GO:0001816,GO:0009986,GO:0006952,GO:0001817,GO:0051239,GO:0050896,GO:0002696,GO:0050867,GO:0006950,GO:0048584,GO:0050778,GO:0044459,GO:0050776,GO:0048518,GO:0044699,GO:0002764,GO:0009607,GO:0002757,GO:0044763,GO:0002253,GO:0009897,GO:0048522,GO:0045087,GO:0048583,GO:0005575,GO:0005515,GO:0031349,GO:0044707,GO:…	immune system process,immune response,leukocyte activation,cell activation,regulation of immune system process,positive regulation of immune system process,regulation of cell activation,regulation of leukocyte activation,cytokine production,cell surface,defense response,regulation of cytokine production,regulation of multicellular organismal process,response to stimulus,positive regulation of leu…	ocu04514	Cell adhesion molecules (CAMs)
ENSOCUT00000002758	ENSOCUG00000002754	-	19:37063769-37105315	21.2715	2.16764	3.29472	5e-05	0.00164462	--	GO:0044459,GO:0044699,GO:0044763,GO:0005575,GO:0051179,GO:0071944,GO:0005886,GO:0005488,GO:0016020,GO:0016021,GO:0044765,GO:0031224,GO:0044425,GO:0051234,GO:0006810,GO:0016787,GO:0031226,GO:0008150,GO:0043168,GO:0032559,GO:0030554,GO:0005524,GO:0005887,GO:0043492,GO:0005623,GO:0044464,GO:0035639,GO:0032555,GO:0032550,GO:0001883,GO:0017076,GO:0032549,GO:0001882,GO:0032553,GO:0009987,GO:0022804,GO:…	plasma membrane part,single-organism process,single-organism cellular process,cellular_component,localization,cell periphery,plasma membrane,binding,membrane,integral to membrane,single-organism transport,intrinsic to membrane,membrane part,establishment of localization,transport,hydrolase activity,intrinsic to plasma membrane,biological_process,anion binding,adenyl ribonucleotide binding,adenyl …	ocu02010,ocu04976	ABC transporters,Bile secretion
ENSOCUT00000015269	ENSOCUG00000015269	ADAP2	19:21702675-21725780	24.2165	2.34123	3.37065	5e-05	0.00164462	ArfGAP with dual PH domains 2 [Source:HGNC Symbol;Acc:HGNC:16487]	GO:0048731,GO:0007275,GO:0044699,GO:0048513,GO:0044767,GO:0048856,GO:0032502,GO:0005575,GO:0005515,GO:0044707,GO:0071944,GO:0032501,GO:0005886,GO:0005488,GO:0016020,GO:0065007,GO:0044093,GO:0050794,GO:0050789,GO:0065009,GO:0072358,GO:0072359,GO:0043085,GO:0051174,GO:0019220,GO:0050790,GO:0006793,GO:0008150,GO:0043168,GO:0006796,GO:0005623,GO:0044464,GO:0051336,GO:0005737,GO:0044710,GO:0009987,GO:…	system development,multicellular organismal development,single-organism process,organ development,single-organism developmental process,anatomical structure development,developmental process,cellular_component,protein binding,single-multicellular organism process,cell periphery,multicellular organismal process,plasma membrane,binding,membrane,biological regulation,positive regulation of molecular…	--	--
ENSOCUT00000006187	ENSOCUG00000006186	CPXM1	4:9814140-9821345	20.1856	3.96616	2.34751	5e-05	0.00164462	carboxypeptidase X (M14 family), member 1 [Source:HGNC Symbol;Acc:HGNC:15771]	GO:0044421,GO:0005576,GO:0005615,GO:0005575,GO:0005488,GO:0016787,GO:0008233,GO:0070011,GO:0008150,GO:0008237,GO:0006508,GO:0043167,GO:0003674,GO:0004180,GO:0008238,GO:0019538,GO:0008235,GO:0046872,GO:0003824,GO:0043169,GO:0004181,GO:0046914,GO:0008270,GO:0044238,GO:0071704,GO:0043170,GO:0008152	extracellular region part,extracellular region,extracellular space,cellular_component,binding,hydrolase activity,peptidase activity,peptidase activity, acting on L-amino acid peptides,biological_process,metallopeptidase activity,proteolysis,ion binding,molecular_function,carboxypeptidase activity,exopeptidase activity,protein metabolic process,metalloexopeptidase activity,metal ion binding,cataly…	--	--
ENSOCUT00000013056	ENSOCUG00000013049	PLXND1	9:10971718-11011134	35.0531	7.25175	2.27314	5e-05	0.00164462	plexin D1 [Source:HGNC Symbol;Acc:HGNC:9107]	GO:0051239,GO:0050896,GO:0048731,GO:0044459,GO:0007275,GO:0044699,GO:0048513,GO:0044767,GO:0048856,GO:0044763,GO:0016477,GO:0032502,GO:2000026,GO:0005575,GO:0005515,GO:0040011,GO:0048870,GO:0051674,GO:0051179,GO:0040012,GO:0030334,GO:0006928,GO:0044707,GO:2000145,GO:0032879,GO:0071944,GO:0051270,GO:0032501,GO:0051716,GO:0050793,GO:0005886,GO:0005488,GO:0045765,GO:1901342,GO:0016020,GO:0001525,GO:…	regulation of multicellular organismal process,response to stimulus,system development,plasma membrane part,multicellular organismal development,single-organism process,organ development,single-organism developmental process,anatomical structure development,single-organism cellular process,cell migration,developmental process,regulation of multicellular organismal development,cellular_component,p…	--	--
ENSOCUT00000008247	ENSOCUG00000008226	FBN2	3:11894214-12132302	18.0416	1.40029	3.68754	5e-05	0.00164462	fibrillin 2 [Source:HGNC Symbol;Acc:HGNC:3604]	GO:0044421,GO:0005576,GO:0051239,GO:0050896,GO:0070887,GO:0010033,GO:0048731,GO:0007275,GO:0048518,GO:0044699,GO:0048513,GO:0044767,GO:0048856,GO:0031012,GO:0044763,GO:0048522,GO:0048583,GO:0032502,GO:2000026,GO:0005575,GO:0005515,GO:0042221,GO:0071310,GO:0048519,GO:0051179,GO:0005578,GO:0030154,GO:0044707,GO:0048523,GO:0051094,GO:0032501,GO:0051716,GO:0050793,GO:0048869,GO:0051240,GO:0009966,GO:…	extracellular region part,extracellular region,regulation of multicellular organismal process,response to stimulus,cellular response to chemical stimulus,response to organic substance,system development,multicellular organismal development,positive regulation of biological process,single-organism process,organ development,single-organism developmental process,anatomical structure development,extr…	--	--
ENSOCUT00000008241	ENSOCUG00000008243	MAD2L1	15:95191374-95198571	6.92118	32.0151	-2.20966	5e-05	0.00164462	MAD2 mitotic arrest deficient-like 1 (yeast) [Source:HGNC Symbol;Acc:HGNC:6763]	GO:0046983,GO:0048518,GO:0044699,GO:0044427,GO:0044763,GO:0048522,GO:0005694,GO:0005575,GO:0005515,GO:0048519,GO:0048523,GO:0043067,GO:0042981,GO:0006915,GO:0012501,GO:0043066,GO:0008219,GO:0016265,GO:0043069,GO:0000278,GO:0010941,GO:0007059,GO:0005488,GO:0022402,GO:0060548,GO:0007049,GO:0016020,GO:0000280,GO:0007067,GO:0007346,GO:0043228,GO:0043232,GO:0065007,GO:0016021,GO:0031224,GO:0050794,GO:…	protein dimerization activity,positive regulation of biological process,single-organism process,chromosomal part,single-organism cellular process,positive regulation of cellular process,chromosome,cellular_component,protein binding,negative regulation of biological process,negative regulation of cellular process,regulation of programmed cell death,regulation of apoptotic process,apoptotic process…	ocu04110,ocu05166,ocu04914,ocu04114	Cell cycle,HTLV-I infection,Progesterone-mediated oocyte maturation,Oocyte meiosis
ENSOCUT00000028233	ENSOCUG00000024654	IL37	2:97681835-97693940	0	1.38286	#NAME?	5e-05	0.00164462	interleukin 37 [Source:HGNC Symbol;Acc:HGNC:15563]	GO:0002376,GO:0006955,GO:0044421,GO:0005576,GO:0006952,GO:0050896,GO:0006950,GO:0006954,GO:0009611,GO:0005615,GO:0005575,GO:0005515,GO:0005102,GO:0005488,GO:0005125,GO:0043228,GO:0043232,GO:0005126,GO:0043226,GO:0008150,GO:0043227,GO:0005623,GO:0044464,GO:0005737,GO:0070851,GO:0003674,GO:0044424,GO:0044422,GO:0044446,GO:0005622,GO:0043229,GO:0005149,GO:0043231,GO:0005634,GO:0005730,GO:0031981,GO:…	immune system process,immune response,extracellular region part,extracellular region,defense response,response to stimulus,response to stress,inflammatory response,response to wounding,extracellular space,cellular_component,protein binding,receptor binding,binding,cytokine activity,non-membrane-bounded organelle,intracellular non-membrane-bounded organelle,cytokine receptor binding,organelle,biol…	--	--
ENSOCUT00000003227	ENSOCUG00000003229	-	GL018713:172939-175626	4.00926	28.9431	-2.85181	5e-05	0.00164462	Corticostatin-3 [Source:UniProtKB/Swiss-Prot;Acc:P01376]	GO:0002376,GO:0044421,GO:0005576,GO:0006952,GO:0050896,GO:0006950,GO:0009617,GO:0005615,GO:0051707,GO:0009607,GO:0005575,GO:0051704,GO:0002252,GO:0065007,GO:0042742,GO:0001906,GO:0065008,GO:0009615,GO:0008150,GO:0051607,GO:0009620,GO:0050832,GO:0035821,GO:0031640,GO:0044364	immune system process,extracellular region part,extracellular region,defense response,response to stimulus,response to stress,response to bacterium,extracellular space,response to other organism,response to biotic stimulus,cellular_component,multi-organism process,immune effector process,biological regulation,defense response to bacterium,cell killing,regulation of biological quality,response to …	--	--
ENSOCUT00000002280	ENSOCUG00000002281	CYP2U1	15:41584590-41605636	3.45578	45.2391	-3.71049	5e-05	0.00164462	cytochrome P450 family 2 subfamily U member 1 [Source:HGNC Symbol;Acc:HGNC:20582]	GO:0005575,GO:0005488,GO:0016020,GO:0016021,GO:0031224,GO:0044425,GO:0008150,GO:0044710,GO:0043167,GO:0003674,GO:0046872,GO:0003824,GO:0043169,GO:0046906,GO:0016705,GO:0020037,GO:0055114,GO:1901363,GO:0097159,GO:0046914,GO:0005506,GO:0016712,GO:0016491,GO:0004497,GO:0008152	cellular_component,binding,membrane,integral to membrane,intrinsic to membrane,membrane part,biological_process,single-organism metabolic process,ion binding,molecular_function,metal ion binding,catalytic activity,cation binding,tetrapyrrole binding,oxidoreductase activity, acting on paired donors, with incorporation or reduction of molecular oxygen,heme binding,oxidation-reduction process,hetero…	ocu00590,ocu01100	Arachidonic acid metabolism,Metabolic pathways
ENSOCUT00000007500	ENSOCUG00000007499	LMNB1	3:10511425-10564394	14.2561	69.3471	-2.28225	5e-05	0.00164462	lamin B1 [Source:HGNC Symbol;Acc:HGNC:6637]	GO:0005575,GO:0005515,GO:0005488,GO:0016020,GO:0043228,GO:0043232,GO:0005856,GO:0044430,GO:0043226,GO:0043227,GO:0019899,GO:0005882,GO:0005623,GO:0044464,GO:0045111,GO:0016363,GO:0043274,GO:0003674,GO:0034399,GO:0044424,GO:0005638,GO:0044422,GO:0044446,GO:0005622,GO:0032991,GO:0043229,GO:0005652,GO:0043231,GO:0005634,GO:0043234,GO:0005637,GO:0005198,GO:0005635,GO:0031981,GO:0031974,GO:0070013,GO:…	cellular_component,protein binding,binding,membrane,non-membrane-bounded organelle,intracellular non-membrane-bounded organelle,cytoskeleton,cytoskeletal part,organelle,membrane-bounded organelle,enzyme binding,intermediate filament,cell,cell part,intermediate filament cytoskeleton,nuclear matrix,phospholipase binding,molecular_function,nuclear periphery,intracellular part,lamin filament,organell…	--	--
ENSOCUT00000005819	ENSOCUG00000005819	ZAP70	2:94409897-94435968	1.72809	29.1601	-4.07674	5e-05	0.00164462	zeta chain of T cell receptor associated protein kinase 70kDa [Source:HGNC Symbol;Acc:HGNC:12858]	GO:0002376,GO:0006955,GO:0045321,GO:0001775,GO:0002682,GO:0002684,GO:0046649,GO:0002521,GO:0050865,GO:0002694,GO:0002520,GO:0042110,GO:0030097,GO:0048534,GO:0051249,GO:0051239,GO:0030098,GO:0051251,GO:0050896,GO:0002696,GO:0050867,GO:0050870,GO:0050863,GO:0048584,GO:0048731,GO:0050778,GO:0044459,GO:0050776,GO:0007275,GO:0030217,GO:0048518,GO:0044699,GO:0046651,GO:0032943,GO:0002764,GO:0070661,GO:…	immune system process,immune response,leukocyte activation,cell activation,regulation of immune system process,positive regulation of immune system process,lymphocyte activation,leukocyte differentiation,regulation of cell activation,regulation of leukocyte activation,immune system development,T cell activation,hemopoiesis,hematopoietic or lymphoid organ development,regulation of lymphocyte activ…	ocu05340,ocu04660,ocu04064,ocu04650,ocu04014	Primary immunodeficiency,T cell receptor signaling pathway,NF-kappa B signaling pathway,Natural killer cell mediated cytotoxicity,Ras signaling pathway
ENSOCUT00000030192	ENSOCUG00000022346	CD5	GL018717:3960166-3984972	1.85772	31.0203	-4.06161	5e-05	0.00164462	T-cell surface glycoprotein CD5 precursor [Source:RefSeq peptide;Acc:NP_001075646]	GO:0002376,GO:0045321,GO:0001775,GO:0002682,GO:0002684,GO:0046649,GO:0050865,GO:0002694,GO:0042110,GO:0009986,GO:0051249,GO:0051251,GO:0050896,GO:0002696,GO:0050867,GO:0050870,GO:0050863,GO:0044459,GO:0048518,GO:0044699,GO:0044763,GO:0009897,GO:0048522,GO:0005575,GO:0005515,GO:0051179,GO:0071944,GO:0051716,GO:0005886,GO:0006915,GO:0012501,GO:0008219,GO:0016265,GO:0005488,GO:0031295,GO:0031294,GO:…	immune system process,leukocyte activation,cell activation,regulation of immune system process,positive regulation of immune system process,lymphocyte activation,regulation of cell activation,regulation of leukocyte activation,T cell activation,cell surface,regulation of lymphocyte activation,positive regulation of lymphocyte activation,response to stimulus,positive regulation of leukocyte activa…	ocu04640	Hematopoietic cell lineage
ENSOCUT00000023710	ENSOCUG00000024702	HIST1H2BE	12:10839455-10839836	67.5342	681.776	-3.33561	5e-05	0.00164462	--	GO:0000786,GO:0032993,GO:0046982,GO:0046983,GO:0000785,GO:0044427,GO:0005694,GO:0005575,GO:0005515,GO:0005488,GO:0043228,GO:0043232,GO:0003677,GO:0043226,GO:0043227,GO:0005623,GO:0044464,GO:0003674,GO:0044424,GO:0044422,GO:0044446,GO:0005622,GO:0032991,GO:0043229,GO:0043231,GO:0005634,GO:1901363,GO:0097159,GO:0003676	nucleosome,protein-DNA complex,protein heterodimerization activity,protein dimerization activity,chromatin,chromosomal part,chromosome,cellular_component,protein binding,binding,non-membrane-bounded organelle,intracellular non-membrane-bounded organelle,DNA binding,organelle,membrane-bounded organelle,cell,cell part,molecular_function,intracellular part,organelle part,intracellular organelle part…	ocu05322,ocu05034,ocu05203	Systemic lupus erythematosus,Alcoholism,Viral carcinogenesis
ENSOCUT00000014250	ENSOCUG00000014250	TRDC	17:42732499-42743319	0.987062	63.8828	-6.01614	5e-05	0.00164462	T cell receptor delta constant [Source:HGNC Symbol;Acc:HGNC:12253]	GO:0009986,GO:0044459,GO:0009897,GO:0005575,GO:0071944,GO:0005886,GO:0016020,GO:0044425,GO:0005623,GO:0044464	cell surface,plasma membrane part,external side of plasma membrane,cellular_component,cell periphery,plasma membrane,membrane,membrane part,cell,cell part	--	--
ENSOCUT00000009190	ENSOCUG00000009195	CLEC4E	8:33490791-33497808	20.0594	1.88691	3.41018	5e-05	0.00164462	C-type lectin domain family 4 member E [Source:HGNC Symbol;Acc:HGNC:14555]	GO:0002376,GO:0006955,GO:0045321,GO:0001775,GO:0002682,GO:0046649,GO:0002521,GO:0002520,GO:0001816,GO:0042110,GO:0030097,GO:0048534,GO:0006952,GO:0001817,GO:0051239,GO:0030098,GO:0050896,GO:0006950,GO:0009617,GO:0048731,GO:0050776,GO:0007275,GO:0030217,GO:0048518,GO:0044699,GO:0002764,GO:0048513,GO:0051707,GO:0044767,GO:0048856,GO:0009607,GO:0044763,GO:0048522,GO:0045087,GO:0048583,GO:0032502,GO:…	immune system process,immune response,leukocyte activation,cell activation,regulation of immune system process,lymphocyte activation,leukocyte differentiation,immune system development,cytokine production,T cell activation,hemopoiesis,hematopoietic or lymphoid organ development,defense response,regulation of cytokine production,regulation of multicellular organismal process,lymphocyte differentia…	ocu05152	Tuberculosis
ENSOCUT00000009193	ENSOCUG00000009190	-	17:186389-204441	373.814	68.7349	2.44321	5e-05	0.00164462	--	GO:0050896,GO:0048731,GO:0007275,GO:0044699,GO:0044767,GO:0048856,GO:0044763,GO:0032502,GO:0005575,GO:0051179,GO:0030154,GO:0044707,GO:0032501,GO:0051716,GO:0048869,GO:0005764,GO:0000323,GO:0005773,GO:0016020,GO:0065007,GO:0010876,GO:0050794,GO:0019915,GO:0007165,GO:0050789,GO:0009653,GO:0007154,GO:0044700,GO:0023052,GO:0033036,GO:0016042,GO:0007166,GO:0004553,GO:0016787,GO:0016043,GO:0006629,GO:…	response to stimulus,system development,multicellular organismal development,single-organism process,single-organism developmental process,anatomical structure development,single-organism cellular process,developmental process,cellular_component,localization,cell differentiation,single-multicellular organism process,multicellular organismal process,cellular response to stimulus,cellular developme…	ocu04142,ocu00531,ocu00511,ocu00520,ocu00603,ocu00604,ocu01100	Lysosome,Glycosaminoglycan degradation,Other glycan degradation,Amino sugar and nucleotide sugar metabolism,Glycosphingolipid biosynthesis - globo series,Glycosphingolipid biosynthesis - ganglio series,Metabolic pathways
ENSOCUT00000012934	ENSOCUG00000012939	ENPP5	12:35423326-35433502	0.46489	3.587	-2.94781	5e-05	0.00164462	ectonucleotide pyrophosphatase/phosphodiesterase 5 (putative) [Source:HGNC Symbol;Acc:HGNC:13717]	GO:0005575,GO:0071944,GO:0005886,GO:0016020,GO:0016021,GO:0031224,GO:0044425,GO:0008150,GO:0005623,GO:0044464,GO:0003674,GO:0003824,GO:0008152	cellular_component,cell periphery,plasma membrane,membrane,integral to membrane,intrinsic to membrane,membrane part,biological_process,cell,cell part,molecular_function,catalytic activity,metabolic process	--	--
ENSOCUT00000010423	ENSOCUG00000010425	FABP5	3:96996073-97001169	276.611	31.1126	3.15229	5e-05	0.00164462	fatty acid binding protein 5 [Source:HGNC Symbol;Acc:HGNC:3560]	GO:0044421,GO:0005576,GO:0031982,GO:0031988,GO:0070062,GO:0043230,GO:0065010,GO:0044699,GO:0005575,GO:0005515,GO:0051179,GO:0005488,GO:0044765,GO:0051234,GO:0006810,GO:0006066,GO:1901615,GO:0071702,GO:0046165,GO:0006629,GO:0044283,GO:0008610,GO:1901617,GO:0044711,GO:0043226,GO:0006793,GO:0008150,GO:0006796,GO:0043227,GO:0044255,GO:0044106,GO:0008643,GO:0009308,GO:0015758,GO:0008645,GO:0044710,GO:…	extracellular region part,extracellular region,vesicle,membrane-bounded vesicle,extracellular vesicular exosome,extracellular organelle,extracellular membrane-bounded organelle,single-organism process,cellular_component,protein binding,localization,binding,single-organism transport,establishment of localization,transport,alcohol metabolic process,organic hydroxy compound metabolic process,organic…	ocu03320	PPAR signaling pathway
ENSOCUT00000014423	ENSOCUG00000014423	IKZF1	GL018745:1730412-1853435	5.24788	29.1615	-2.47426	5e-05	0.00164462	IKAROS family zinc finger 1 [Source:HGNC Symbol;Acc:HGNC:13176]	GO:0002376,GO:0045321,GO:0001775,GO:0046649,GO:0002521,GO:0002520,GO:0030097,GO:0048534,GO:0030098,GO:0048731,GO:0007275,GO:0044699,GO:0048513,GO:0044767,GO:0048856,GO:0044763,GO:0032502,GO:0005575,GO:0005515,GO:0030154,GO:0044707,GO:0032501,GO:0048869,GO:0030099,GO:0005488,GO:0065007,GO:0048872,GO:0003677,GO:0065008,GO:0043226,GO:0008150,GO:0043227,GO:0005623,GO:0042592,GO:0044464,GO:0009987,GO:…	immune system process,leukocyte activation,cell activation,lymphocyte activation,leukocyte differentiation,immune system development,hemopoiesis,hematopoietic or lymphoid organ development,lymphocyte differentiation,system development,multicellular organismal development,single-organism process,organ development,single-organism developmental process,anatomical structure development,single-organis…	--	--
ENSOCUT00000011546	ENSOCUG00000011550	CD86	14:96928918-97000745	30.4784	7.30407	2.06102	5e-05	0.00164462	T-lymphocyte activation antigen CD86 precursor [Source:RefSeq peptide;Acc:NP_001075677]	GO:0002376,GO:0006955,GO:0045321,GO:0001775,GO:0002682,GO:0044421,GO:0005576,GO:0002684,GO:0046649,GO:0050865,GO:0002694,GO:0042110,GO:0009986,GO:0051249,GO:0006952,GO:0051251,GO:0050896,GO:0002696,GO:0070887,GO:0002237,GO:0050867,GO:0010033,GO:0050870,GO:0050863,GO:0031982,GO:0031988,GO:0006950,GO:0048584,GO:0009617,GO:0050778,GO:0044459,GO:0050776,GO:0070062,GO:0043230,GO:0065010,GO:0032496,GO:…	immune system process,immune response,leukocyte activation,cell activation,regulation of immune system process,extracellular region part,extracellular region,positive regulation of immune system process,lymphocyte activation,regulation of cell activation,regulation of leukocyte activation,T cell activation,cell surface,regulation of lymphocyte activation,defense response,positive regulation of ly…	ocu05322,ocu05323,ocu04514,ocu04672,ocu05202,ocu05330,ocu04620,ocu05320,ocu05332,ocu05416,ocu04940	Systemic lupus erythematosus,Rheumatoid arthritis,Cell adhesion molecules (CAMs),Intestinal immune network for IgA production,Transcriptional misregulation in cancer,Allograft rejection,Toll-like receptor signaling pathway,Autoimmune thyroid disease,Graft-versus-host disease,Viral myocarditis,Type I diabetes mellitus
ENSOCUT00000011545	ENSOCUG00000011544	ITGB2	GL019419:5422-21550	183.995	52.5968	1.80662	5e-05	0.00164462	integrin subunit beta 2 [Source:HGNC Symbol;Acc:HGNC:6155]	GO:0002376,GO:0044421,GO:0005576,GO:0009986,GO:0050896,GO:0070887,GO:0031982,GO:0031988,GO:0044459,GO:0007275,GO:0070062,GO:0043230,GO:0065010,GO:0044699,GO:0060326,GO:0044767,GO:0048856,GO:0044763,GO:0016477,GO:0032502,GO:0009605,GO:0005575,GO:0005515,GO:0040011,GO:0042221,GO:0006935,GO:0042330,GO:0048870,GO:0051674,GO:0051179,GO:0050900,GO:0030154,GO:0006928,GO:0044707,GO:0071944,GO:0022610,GO:…	immune system process,extracellular region part,extracellular region,cell surface,response to stimulus,cellular response to chemical stimulus,vesicle,membrane-bounded vesicle,plasma membrane part,multicellular organismal development,extracellular vesicular exosome,extracellular organelle,extracellular membrane-bounded organelle,single-organism process,cell chemotaxis,single-organism developmental…	ocu05323,ocu05150,ocu04514,ocu05146,ocu05152,ocu05144,ocu04145,ocu05140,ocu05416,ocu04650,ocu05133,ocu05166,ocu05134,ocu04015,ocu04670,ocu04810,ocu04390	Rheumatoid arthritis,Staphylococcus aureus infection,Cell adhesion molecules (CAMs),Amoebiasis,Tuberculosis,Malaria,Phagosome,Leishmaniasis,Viral myocarditis,Natural killer cell mediated cytotoxicity,Pertussis,HTLV-I infection,Legionellosis,Rap1 signaling pathway,Leukocyte transendothelial migration,Regulation of actin cytoskeleton,Hippo signaling pathway
ENSOCUT00000011542	ENSOCUG00000011546	-	4:48335539-48341218	4.91397	397.641	-6.33844	5e-05	0.00164462	--	GO:0004553,GO:0016787,GO:0016798,GO:0003796,GO:0003674,GO:0003824	hydrolase activity, hydrolyzing O-glycosyl compounds,hydrolase activity,hydrolase activity, acting on glycosyl bonds,lysozyme activity,molecular_function,catalytic activity	ocu04970	Salivary secretion
ENSOCUT00000008699	ENSOCUG00000024878	HIST1H2AC	12:10943920-10944313	110.517	380.443	-1.78342	5e-05	0.00164462	histone cluster 3, H2a [Source:HGNC Symbol;Acc:HGNC:20507]	GO:0000786,GO:0032993,GO:0044421,GO:0005576,GO:0046982,GO:0050896,GO:0031982,GO:0031988,GO:0006950,GO:0046983,GO:0070062,GO:0043230,GO:0065010,GO:0044699,GO:0000785,GO:0044427,GO:0044763,GO:0005694,GO:0005575,GO:0005515,GO:0051716,GO:0005488,GO:0043228,GO:0043232,GO:0003677,GO:0006259,GO:0016043,GO:0071840,GO:0006333,GO:0000228,GO:0043226,GO:0008150,GO:0044454,GO:0043227,GO:0034728,GO:0022411,GO:…	nucleosome,protein-DNA complex,extracellular region part,extracellular region,protein heterodimerization activity,response to stimulus,vesicle,membrane-bounded vesicle,response to stress,protein dimerization activity,extracellular vesicular exosome,extracellular organelle,extracellular membrane-bounded organelle,single-organism process,chromatin,chromosomal part,single-organism cellular process,c…	ocu05322,ocu05034	Systemic lupus erythematosus,Alcoholism
ENSOCUT00000009250	ENSOCUG00000009244	THBS4	11:747006-792130	35.5245	3.89287	3.18991	5e-05	0.00164462	thrombospondin 4 [Source:HGNC Symbol;Acc:HGNC:11788]	GO:0002376,GO:0002682,GO:0044421,GO:0005576,GO:0002684,GO:0051239,GO:0050896,GO:0070887,GO:0031982,GO:0031988,GO:0006950,GO:0048584,GO:0048731,GO:0007275,GO:0070062,GO:0043230,GO:0065010,GO:0048518,GO:0044699,GO:0005615,GO:0060326,GO:0044767,GO:0048856,GO:0031012,GO:0040017,GO:0044763,GO:0051272,GO:0016477,GO:0048522,GO:0048583,GO:0030335,GO:0032502,GO:0009605,GO:2000026,GO:0005575,GO:2000147,GO:…	immune system process,regulation of immune system process,extracellular region part,extracellular region,positive regulation of immune system process,regulation of multicellular organismal process,response to stimulus,cellular response to chemical stimulus,vesicle,membrane-bounded vesicle,response to stress,positive regulation of response to stimulus,system development,multicellular organismal de…	ocu04512,ocu05144,ocu04151,ocu04145,ocu04510	ECM-receptor interaction,Malaria,PI3K-Akt signaling pathway,Phagosome,Focal adhesion
ENSOCUT00000030935	ENSOCUG00000025569	CCR7	19:41675422-41685281	3.32384	22.5623	-2.76299	5e-05	0.00164462	C-C motif chemokine receptor 7 [Source:HGNC Symbol;Acc:HGNC:1608]	GO:0002376,GO:0006955,GO:0045321,GO:0001775,GO:0002682,GO:0002684,GO:0046649,GO:0002521,GO:0050865,GO:0002694,GO:0002520,GO:0001816,GO:0042110,GO:0030097,GO:0048534,GO:0009986,GO:0051249,GO:0006952,GO:0001817,GO:0051239,GO:0030098,GO:0051251,GO:0050896,GO:0002696,GO:0070887,GO:0002237,GO:0050867,GO:0010033,GO:0050870,GO:0050863,GO:0006950,GO:0048584,GO:0009617,GO:0048731,GO:0050778,GO:0044459,GO:…	immune system process,immune response,leukocyte activation,cell activation,regulation of immune system process,positive regulation of immune system process,lymphocyte activation,leukocyte differentiation,regulation of cell activation,regulation of leukocyte activation,immune system development,cytokine production,T cell activation,hemopoiesis,hematopoietic or lymphoid organ development,cell surfa…	ocu04060,ocu05202,ocu04062	Cytokine-cytokine receptor interaction,Transcriptional misregulation in cancer,Chemokine signaling pathway
ENSOCUT00000022030	ENSOCUG00000021209	-	5:12927624-12929020	2137.75	160.971	3.73122	5e-05	0.00164462	Metallothionein-2D [Source:UniProtKB/Swiss-Prot;Acc:P80291]	GO:0050896,GO:0070887,GO:0044699,GO:0044763,GO:0005575,GO:0042221,GO:0048519,GO:0051716,GO:0005488,GO:0065007,GO:0050789,GO:0071241,GO:0071248,GO:0048471,GO:0010038,GO:0010035,GO:0071294,GO:0043226,GO:0008150,GO:0043227,GO:0010043,GO:0005623,GO:0044464,GO:0005737,GO:0009987,GO:0040008,GO:0040007,GO:0043167,GO:0003674,GO:0044424,GO:0005622,GO:0043229,GO:0046872,GO:0043169,GO:0043231,GO:0005634,GO:…	response to stimulus,cellular response to chemical stimulus,single-organism process,single-organism cellular process,cellular_component,response to chemical stimulus,negative regulation of biological process,cellular response to stimulus,binding,biological regulation,regulation of biological process,cellular response to inorganic substance,cellular response to metal ion,perinuclear region of cyto…	--	--
ENSOCUT00000027515	ENSOCUG00000021306	HIST1H2AB	12:11012381-11012774	20.5434	322.636	-3.97316	5e-05	0.00164462	--	GO:0000786,GO:0032993,GO:0046982,GO:0046983,GO:0000785,GO:0044427,GO:0005694,GO:0005575,GO:0005515,GO:0005488,GO:0043228,GO:0043232,GO:0003677,GO:0043226,GO:0043227,GO:0005623,GO:0044464,GO:0003674,GO:0044424,GO:0044422,GO:0044446,GO:0005622,GO:0032991,GO:0043229,GO:0043231,GO:0005634,GO:1901363,GO:0097159,GO:0003676	nucleosome,protein-DNA complex,protein heterodimerization activity,protein dimerization activity,chromatin,chromosomal part,chromosome,cellular_component,protein binding,binding,non-membrane-bounded organelle,intracellular non-membrane-bounded organelle,DNA binding,organelle,membrane-bounded organelle,cell,cell part,molecular_function,intracellular part,organelle part,intracellular organelle part…	ocu05322,ocu05034	Systemic lupus erythematosus,Alcoholism
ENSOCUT00000027516	ENSOCUG00000021941	-	GL018747:708954-709365	4.70314	65.7091	-3.8044	5e-05	0.00164462	--	GO:0000786,GO:0032993,GO:0046982,GO:0046983,GO:0000785,GO:0044427,GO:0005694,GO:0005575,GO:0005515,GO:0005488,GO:0043228,GO:0043232,GO:0003677,GO:0043226,GO:0043227,GO:0005623,GO:0044464,GO:0003674,GO:0044424,GO:0044422,GO:0044446,GO:0005622,GO:0032991,GO:0043229,GO:0043231,GO:0005634,GO:1901363,GO:0097159,GO:0003676	nucleosome,protein-DNA complex,protein heterodimerization activity,protein dimerization activity,chromatin,chromosomal part,chromosome,cellular_component,protein binding,binding,non-membrane-bounded organelle,intracellular non-membrane-bounded organelle,DNA binding,organelle,membrane-bounded organelle,cell,cell part,molecular_function,intracellular part,organelle part,intracellular organelle part…	ocu05322,ocu05034,ocu05202	Systemic lupus erythematosus,Alcoholism,Transcriptional misregulation in cancer
ENSOCUT00000015052	ENSOCUG00000015057	MPEG1	1:192106879-192109033	357.279	39.0074	3.19523	5e-05	0.00164462	macrophage expressed 1 [Source:HGNC Symbol;Acc:HGNC:29619]	GO:0005575,GO:0016020,GO:0016021,GO:0031224,GO:0044425	cellular_component,membrane,integral to membrane,intrinsic to membrane,membrane part	--	--
ENSOCUT00000000574	ENSOCUG00000000575	HAVCR1	3:38519798-38546290	62.6601	12.3058	2.34821	5e-05	0.00164462	hepatitis A virus cellular receptor 1 [Source:HGNC Symbol;Acc:HGNC:17866]	GO:0005575,GO:0016020,GO:0016021,GO:0031224,GO:0044425	cellular_component,membrane,integral to membrane,intrinsic to membrane,membrane part	--	--
ENSOCUT00000008087	ENSOCUG00000008077	POLQ	14:97410190-97514112	0.580579	3.64739	-2.6513	5e-05	0.00164462	polymerase (DNA) theta [Source:HGNC Symbol;Acc:HGNC:9186]	GO:0002376,GO:0002520,GO:0050896,GO:0006950,GO:0048731,GO:0007275,GO:0044699,GO:0048856,GO:0044763,GO:0048583,GO:0032502,GO:0005515,GO:0048519,GO:0044707,GO:0048523,GO:0032501,GO:0051716,GO:0005488,GO:0080134,GO:0048585,GO:0065007,GO:0050794,GO:0050789,GO:0003677,GO:0002200,GO:0016787,GO:0006259,GO:0016043,GO:0002440,GO:0006261,GO:0071840,GO:0006310,GO:0006260,GO:0009892,GO:0008150,GO:0043168,GO:…	immune system process,immune system development,response to stimulus,response to stress,system development,multicellular organismal development,single-organism process,anatomical structure development,single-organism cellular process,regulation of response to stimulus,developmental process,protein binding,negative regulation of biological process,single-multicellular organism process,negative reg…	--	--
ENSOCUT00000034077	ENSOCUG00000029644	ICAM1	GL018833:97979-106836	92.9777	24.9895	1.89556	5e-05	0.00164462	intercellular adhesion molecule 1 [Source:HGNC Symbol;Acc:HGNC:5344]	GO:0002376,GO:0006955,GO:0045321,GO:0001775,GO:0002682,GO:0044421,GO:0005576,GO:0002684,GO:0046649,GO:0042110,GO:0009986,GO:0050896,GO:0070887,GO:0010033,GO:0031982,GO:0031988,GO:0048584,GO:0044459,GO:0070062,GO:0043230,GO:0065010,GO:0048518,GO:0044699,GO:0005615,GO:0044767,GO:0048856,GO:0040017,GO:0044763,GO:0051272,GO:0016477,GO:0009897,GO:0048522,GO:0048583,GO:0030335,GO:0032502,GO:0005575,GO:…	immune system process,immune response,leukocyte activation,cell activation,regulation of immune system process,extracellular region part,extracellular region,positive regulation of immune system process,lymphocyte activation,T cell activation,cell surface,response to stimulus,cellular response to chemical stimulus,response to organic substance,vesicle,membrane-bounded vesicle,positive regulation …	ocu05323,ocu05150,ocu04514,ocu05144,ocu05143,ocu04064,ocu05416,ocu04650,ocu05166,ocu04670,ocu05164,ocu04668,ocu05169	Rheumatoid arthritis,Staphylococcus aureus infection,Cell adhesion molecules (CAMs),Malaria,African trypanosomiasis,NF-kappa B signaling pathway,Viral myocarditis,Natural killer cell mediated cytotoxicity,HTLV-I infection,Leukocyte transendothelial migration,Influenza A,TNF signaling pathway,Epstein-Barr virus infection
ENSOCUT00000003670	ENSOCUG00000003668	LCK	GL018704:5907642-5916977	4.02546	230.65	-5.84041	5e-05	0.00164462	LCK proto-oncogene, Src family tyrosine kinase [Source:HGNC Symbol;Acc:HGNC:6524]	GO:0002376,GO:0045321,GO:0001775,GO:0002682,GO:0044421,GO:0005576,GO:0002684,GO:0046649,GO:0002521,GO:0050865,GO:0002694,GO:0002520,GO:0042110,GO:0030097,GO:0048534,GO:0051249,GO:0030098,GO:0051251,GO:0050896,GO:0002696,GO:0050867,GO:0050870,GO:0050863,GO:0031982,GO:0031988,GO:0048584,GO:0048731,GO:0044459,GO:0007275,GO:0070062,GO:0030217,GO:0043230,GO:0065010,GO:0048518,GO:0044699,GO:0048513,GO:…	immune system process,leukocyte activation,cell activation,regulation of immune system process,extracellular region part,extracellular region,positive regulation of immune system process,lymphocyte activation,leukocyte differentiation,regulation of cell activation,regulation of leukocyte activation,immune system development,T cell activation,hemopoiesis,hematopoietic or lymphoid organ development…	ocu05340,ocu04660,ocu04064,ocu04380,ocu04650,ocu05166	Primary immunodeficiency,T cell receptor signaling pathway,NF-kappa B signaling pathway,Osteoclast differentiation,Natural killer cell mediated cytotoxicity,HTLV-I infection
ENSOCUT00000006801	ENSOCUG00000006801	MCM10	16:17839416-17881618	0.780258	5.41856	-2.79589	5e-05	0.00164462	minichromosome maintenance 10 replication initiation factor [Source:HGNC Symbol;Acc:HGNC:18043]	GO:0050896,GO:0006950,GO:0044699,GO:0044763,GO:0005575,GO:0008283,GO:0005515,GO:0051716,GO:0005488,GO:0043228,GO:0043232,GO:0006259,GO:0042802,GO:0006260,GO:0043226,GO:0008150,GO:0043227,GO:0019899,GO:0005623,GO:0044464,GO:0005737,GO:0009987,GO:0033554,GO:0003674,GO:0044424,GO:0006974,GO:0044422,GO:0044446,GO:0005622,GO:0043229,GO:0043231,GO:0005634,GO:0044238,GO:0071704,GO:0005730,GO:0006807,GO:…	response to stimulus,response to stress,single-organism process,single-organism cellular process,cellular_component,cell proliferation,protein binding,cellular response to stimulus,binding,non-membrane-bounded organelle,intracellular non-membrane-bounded organelle,DNA metabolic process,identical protein binding,DNA replication,organelle,biological_process,membrane-bounded organelle,enzyme binding…	--	--
ENSOCUT00000013748	ENSOCUG00000013751	CCDC109B	15:39732489-39838846	45.2861	8.83627	2.35756	5e-05	0.00164462	coiled-coil domain containing 109B [Source:HGNC Symbol;Acc:HGNC:26076]	GO:0044699,GO:0044763,GO:0005575,GO:0005515,GO:0051179,GO:0005488,GO:0016020,GO:0065007,GO:0016021,GO:0044765,GO:0031224,GO:0044425,GO:0051234,GO:0006810,GO:0051641,GO:0065008,GO:0051649,GO:0043226,GO:0008150,GO:0043227,GO:0006811,GO:0005623,GO:0042592,GO:0044464,GO:0005737,GO:0009987,GO:0048878,GO:0006873,GO:0005246,GO:0003674,GO:0006816,GO:0006875,GO:0070838,GO:0072511,GO:0050801,GO:0055082,GO:…	single-organism process,single-organism cellular process,cellular_component,protein binding,localization,binding,membrane,biological regulation,integral to membrane,single-organism transport,intrinsic to membrane,membrane part,establishment of localization,transport,cellular localization,regulation of biological quality,establishment of localization in cell,organelle,biological_process,membrane-b…	--	--
ENSOCUT00000001483	ENSOCUG00000001481	FAM65B	12:12155145-12212751	6.62443	39.7827	-2.58627	5e-05	0.00164462	--	GO:0048731,GO:0007275,GO:0044699,GO:0048513,GO:0044767,GO:0048856,GO:0044763,GO:0032502,GO:0005515,GO:0030154,GO:0044707,GO:0032501,GO:0048869,GO:0005488,GO:0009888,GO:0008150,GO:0009987,GO:0048468,GO:0050954,GO:0007605,GO:0048741,GO:0007517,GO:0003674,GO:0014706,GO:0060537,GO:0048747,GO:0061061,GO:0051146,GO:0007519,GO:0042692,GO:0055001,GO:0060538,GO:0055002,GO:0003008,GO:0050877,GO:0007600	system development,multicellular organismal development,single-organism process,organ development,single-organism developmental process,anatomical structure development,single-organism cellular process,developmental process,protein binding,cell differentiation,single-multicellular organism process,multicellular organismal process,cellular developmental process,binding,tissue development,biologica…	--	--
ENSOCUT00000013120	ENSOCUG00000013123	KRT13	19:42498955-42515280	0	10.8814	#NAME?	5e-05	0.00164462	keratin 13 [Source:HGNC Symbol;Acc:HGNC:6415]	GO:0044421,GO:0005576,GO:0031982,GO:0031988,GO:0070062,GO:0043230,GO:0065010,GO:0044699,GO:0044763,GO:0005575,GO:0005515,GO:0005488,GO:0043228,GO:0043232,GO:0005856,GO:0044430,GO:0016043,GO:0071840,GO:0043226,GO:0008150,GO:0043227,GO:0007010,GO:0005882,GO:0005623,GO:0044464,GO:0009987,GO:0045111,GO:0003674,GO:0044424,GO:0045095,GO:0006996,GO:0044422,GO:0044446,GO:0005622,GO:0032991,GO:0043229,GO:…	extracellular region part,extracellular region,vesicle,membrane-bounded vesicle,extracellular vesicular exosome,extracellular organelle,extracellular membrane-bounded organelle,single-organism process,single-organism cellular process,cellular_component,protein binding,binding,non-membrane-bounded organelle,intracellular non-membrane-bounded organelle,cytoskeleton,cytoskeletal part,cellular compon…	--	--
ENSOCUT00000021854	ENSOCUG00000020975	CSTB	GL019091:156671-157735	572.571	177.608	1.68876	5e-05	0.00164462	cystatin B [Source:HGNC Symbol;Acc:HGNC:2482]	GO:0044421,GO:0005576,GO:0050896,GO:0031982,GO:0031988,GO:0070062,GO:0043230,GO:0065010,GO:0044699,GO:0005615,GO:0005575,GO:0005515,GO:0048519,GO:0044707,GO:0048523,GO:0032501,GO:0005488,GO:0043228,GO:0043232,GO:0065007,GO:0050794,GO:0050789,GO:0065009,GO:0051246,GO:0052547,GO:0032268,GO:0050790,GO:0007610,GO:0043226,GO:0009892,GO:0008150,GO:0043227,GO:0010466,GO:0019899,GO:0010605,GO:0044092,GO:…	extracellular region part,extracellular region,response to stimulus,vesicle,membrane-bounded vesicle,extracellular vesicular exosome,extracellular organelle,extracellular membrane-bounded organelle,single-organism process,extracellular space,cellular_component,protein binding,negative regulation of biological process,single-multicellular organism process,negative regulation of cellular process,mu…	--	--
ENSOCUT00000032036	ENSOCUG00000025038	-	12:10805788-10806199	66.711	500.383	-2.90704	5e-05	0.00164462	--	GO:0000786,GO:0032993,GO:0046982,GO:0046983,GO:0000785,GO:0044427,GO:0005694,GO:0005575,GO:0005515,GO:0005488,GO:0043228,GO:0043232,GO:0003677,GO:0043226,GO:0043227,GO:0005623,GO:0044464,GO:0003674,GO:0044424,GO:0044422,GO:0044446,GO:0005622,GO:0032991,GO:0043229,GO:0043231,GO:0005634,GO:1901363,GO:0097159,GO:0003676	nucleosome,protein-DNA complex,protein heterodimerization activity,protein dimerization activity,chromatin,chromosomal part,chromosome,cellular_component,protein binding,binding,non-membrane-bounded organelle,intracellular non-membrane-bounded organelle,DNA binding,organelle,membrane-bounded organelle,cell,cell part,molecular_function,intracellular part,organelle part,intracellular organelle part…	ocu05322,ocu05034,ocu05202	Systemic lupus erythematosus,Alcoholism,Transcriptional misregulation in cancer
ENSOCUT00000011231	ENSOCUG00000011231	CSF3R	GL018704:1913347-1928535	0.895379	5.78174	-2.69093	5e-05	0.00164462	colony stimulating factor 3 receptor [Source:HGNC Symbol;Acc:HGNC:2439]	GO:0002376,GO:0002682,GO:0002520,GO:0030097,GO:0048534,GO:0051239,GO:0050896,GO:0070887,GO:0010033,GO:0048731,GO:0007275,GO:0044699,GO:0048513,GO:0060326,GO:0044767,GO:0034097,GO:0048856,GO:0044763,GO:0016477,GO:0032502,GO:0009605,GO:2000026,GO:0005575,GO:0005515,GO:0040011,GO:0042221,GO:0071310,GO:0006935,GO:0071345,GO:0042330,GO:0048870,GO:0051674,GO:0051179,GO:0050900,GO:0030154,GO:0006928,GO:…	immune system process,regulation of immune system process,immune system development,hemopoiesis,hematopoietic or lymphoid organ development,regulation of multicellular organismal process,response to stimulus,cellular response to chemical stimulus,response to organic substance,system development,multicellular organismal development,single-organism process,organ development,cell chemotaxis,single-o…	ocu04640,ocu04060,ocu04151,ocu04630,ocu05200	Hematopoietic cell lineage,Cytokine-cytokine receptor interaction,PI3K-Akt signaling pathway,Jak-STAT signaling pathway,Pathways in cancer
ENSOCUT00000013165	ENSOCUG00000013150	DSP	12:1278853-1313511	0.806192	7.23272	-3.16534	5e-05	0.00164462	desmoplakin [Source:HGNC Symbol;Acc:HGNC:3052]	GO:0044421,GO:0005576,GO:0051239,GO:0031982,GO:0031988,GO:0048731,GO:0044459,GO:0007275,GO:0070062,GO:0043230,GO:0065010,GO:0044699,GO:0048513,GO:0044767,GO:0048856,GO:0044763,GO:0032502,GO:0005575,GO:0005515,GO:0051179,GO:0030154,GO:0044707,GO:0071944,GO:0022610,GO:0032501,GO:0005886,GO:0007155,GO:0048869,GO:0005488,GO:0016020,GO:0043228,GO:0043232,GO:0065007,GO:0016337,GO:0050839,GO:0005856,GO:…	extracellular region part,extracellular region,regulation of multicellular organismal process,vesicle,membrane-bounded vesicle,system development,plasma membrane part,multicellular organismal development,extracellular vesicular exosome,extracellular organelle,extracellular membrane-bounded organelle,single-organism process,organ development,single-organism developmental process,anatomical structu…	ocu05412	Arrhythmogenic right ventricular cardiomyopathy (ARVC)
ENSOCUT00000015258	ENSOCUG00000015247	ZDHHC14	12:147669840-147927085	18.6026	3.51811	2.40263	5e-05	0.00164462	zinc finger DHHC-type containing 14 [Source:HGNC Symbol;Acc:HGNC:20341]	GO:0005575,GO:0005488,GO:0016020,GO:0016021,GO:0031224,GO:0044425,GO:0043226,GO:0008150,GO:0043227,GO:0005623,GO:0044464,GO:0005737,GO:0009987,GO:0006464,GO:0036211,GO:0043167,GO:0043412,GO:0003674,GO:0044424,GO:0019538,GO:0005622,GO:0005783,GO:0043229,GO:0018345,GO:0019706,GO:0019707,GO:0043543,GO:0046872,GO:0003824,GO:0016417,GO:0042157,GO:0043169,GO:0043231,GO:0016409,GO:0044444,GO:0006497,GO:…	cellular_component,binding,membrane,integral to membrane,intrinsic to membrane,membrane part,organelle,biological_process,membrane-bounded organelle,cell,cell part,cytoplasm,cellular process,cellular protein modification process,protein modification process,ion binding,macromolecule modification,molecular_function,intracellular part,protein metabolic process,intracellular,endoplasmic reticulum,in…	--	--
ENSOCUT00000013953	ENSOCUG00000013956	CD1E	13:34730102-34733919	0.455902	93.2474	-7.6762	5e-05	0.00164462	T-cell surface glycoprotein CD1e, membrane-associated [Source:RefSeq peptide;Acc:NP_001075557]	GO:0002376,GO:0006955,GO:0050896,GO:0008150	immune system process,immune response,response to stimulus,biological_process	ocu04640	Hematopoietic cell lineage
ENSOCUT00000008008	ENSOCUG00000008012	-	3:69407538-69408330	24.9084	167.104	-2.74604	5e-05	0.00164462	--	GO:0048731,GO:0007275,GO:0048518,GO:0044699,GO:0044767,GO:0048856,GO:0044763,GO:0051272,GO:0048522,GO:0032502,GO:0005575,GO:0005515,GO:0048519,GO:0051179,GO:0030154,GO:0006928,GO:0044707,GO:0032879,GO:0048523,GO:0051270,GO:0032501,GO:0048869,GO:0000278,GO:0005488,GO:0022402,GO:0007049,GO:0016020,GO:0065007,GO:0050794,GO:0050789,GO:0009653,GO:0016043,GO:0000226,GO:0071840,GO:0051301,GO:0000910,GO:…	system development,multicellular organismal development,positive regulation of biological process,single-organism process,single-organism developmental process,anatomical structure development,single-organism cellular process,positive regulation of cellular component movement,positive regulation of cellular process,developmental process,cellular_component,protein binding,negative regulation of bi…	ocu05206,ocu04010	MicroRNAs in cancer,MAPK signaling pathway
ENSOCUT00000009063	ENSOCUG00000009065	HNMT	7:75724761-75774182	30.5823	5.92028	2.36896	5e-05	0.00164462	histamine N-methyltransferase [Source:HGNC Symbol;Acc:HGNC:5028]	GO:0044421,GO:0005576,GO:0031982,GO:0031988,GO:0070062,GO:0043230,GO:0065010,GO:0005575,GO:0043226,GO:0008150,GO:0043227,GO:0005623,GO:0044464,GO:0005737,GO:0003674,GO:0044424,GO:0044422,GO:0044446,GO:0005622,GO:0043229,GO:0003824,GO:0043231,GO:0005634,GO:0032259,GO:0008170,GO:0031981,GO:0008152,GO:0016740,GO:0031974,GO:0070013,GO:0043233,GO:0044428,GO:0005654,GO:0008168,GO:0016741	extracellular region part,extracellular region,vesicle,membrane-bounded vesicle,extracellular vesicular exosome,extracellular organelle,extracellular membrane-bounded organelle,cellular_component,organelle,biological_process,membrane-bounded organelle,cell,cell part,cytoplasm,molecular_function,intracellular part,organelle part,intracellular organelle part,intracellular,intracellular organelle,ca…	ocu00340	Histidine metabolism
ENSOCUT00000017539	ENSOCUG00000017542	BASP1	11:42061791-42064337	49.6488	12.1807	2.02716	5e-05	0.00164462	brain abundant membrane attached signal protein 1 [Source:HGNC Symbol;Acc:HGNC:957]	GO:0044421,GO:0005576,GO:0031982,GO:0031988,GO:0048731,GO:0007275,GO:0070062,GO:0043230,GO:0065010,GO:0044699,GO:0048513,GO:0044767,GO:0048856,GO:0044763,GO:0032502,GO:0005575,GO:0005515,GO:0048519,GO:0030154,GO:0044707,GO:0048523,GO:0071944,GO:0032501,GO:0005886,GO:0048869,GO:0005488,GO:0016020,GO:0065007,GO:0050794,GO:0050789,GO:0003677,GO:0009888,GO:0030054,GO:0032835,GO:0019904,GO:0035850,GO:…	extracellular region part,extracellular region,vesicle,membrane-bounded vesicle,system development,multicellular organismal development,extracellular vesicular exosome,extracellular organelle,extracellular membrane-bounded organelle,single-organism process,organ development,single-organism developmental process,anatomical structure development,single-organism cellular process,developmental proces…	--	--
ENSOCUT00000028439	ENSOCUG00000029171	-	GL018758:1391860-1392302	0	7.3261	#NAME?	5e-05	0.00164462	--	--	--	--	--
ENSOCUT00000017426	ENSOCUG00000017422	ITGAX	GL018752:960118-978777	14.0622	0.948779	3.8896	5e-05	0.00164462	integrin subunit alpha X [Source:HGNC Symbol;Acc:HGNC:6152]	GO:0002376,GO:0009986,GO:0006952,GO:0050896,GO:0006950,GO:0044459,GO:0044699,GO:0051707,GO:0009607,GO:0044763,GO:0009897,GO:0005575,GO:0051704,GO:0071944,GO:0022610,GO:0051716,GO:0005886,GO:0007155,GO:0002252,GO:0016020,GO:0065007,GO:0016021,GO:0031224,GO:0050794,GO:0007165,GO:0050789,GO:0044425,GO:0007154,GO:0044700,GO:0023052,GO:0043235,GO:0007166,GO:0031226,GO:0009615,GO:0008150,GO:0005887,GO:…	immune system process,cell surface,defense response,response to stimulus,response to stress,plasma membrane part,single-organism process,response to other organism,response to biotic stimulus,single-organism cellular process,external side of plasma membrane,cellular_component,multi-organism process,cell periphery,biological adhesion,cellular response to stimulus,plasma membrane,cell adhesion,immu…	ocu05152,ocu04810	Tuberculosis,Regulation of actin cytoskeleton
ENSOCUT00000006051	ENSOCUG00000006050	SGOL1	14:6259391-6274810	1.2524	8.25731	-2.72097	5e-05	0.00164462	shugoshin 1 [Source:HGNC Symbol;Acc:HGNC:25088]	GO:0044699,GO:0044427,GO:0044763,GO:0005694,GO:0005575,GO:0005515,GO:0051179,GO:0007059,GO:0005488,GO:0022402,GO:0007049,GO:0043228,GO:0043232,GO:0065007,GO:0005856,GO:0000779,GO:0000793,GO:0000780,GO:0044430,GO:0000775,GO:0000776,GO:0019900,GO:0033036,GO:0008608,GO:0045132,GO:0005819,GO:0051641,GO:0016043,GO:0065008,GO:0000226,GO:0007126,GO:0030892,GO:0071840,GO:0008104,GO:0005813,GO:0000228,GO:…	single-organism process,chromosomal part,single-organism cellular process,chromosome,cellular_component,protein binding,localization,chromosome segregation,binding,cell cycle process,cell cycle,non-membrane-bounded organelle,intracellular non-membrane-bounded organelle,biological regulation,cytoskeleton,condensed chromosome, centromeric region,condensed chromosome,condensed nuclear chromosome, ce…	ocu04114	Oocyte meiosis
ENSOCUT00000024461	ENSOCUG00000013950	KIF18A	1:167049718-167130991	3.11276	13.3084	-2.09607	5e-05	0.00164462	kinesin family member 18A [Source:HGNC Symbol;Acc:HGNC:29441]	GO:0048731,GO:0044459,GO:0007275,GO:0044699,GO:0048513,GO:0044767,GO:0048856,GO:0044427,GO:0044763,GO:0005694,GO:0032502,GO:0005575,GO:0005515,GO:0051179,GO:0006928,GO:0044707,GO:0071944,GO:0032501,GO:0005886,GO:0000278,GO:0007059,GO:0005488,GO:0022402,GO:0007049,GO:0016020,GO:0000280,GO:0007067,GO:0043228,GO:0043232,GO:0065007,GO:0050794,GO:0005856,GO:0045121,GO:0050789,GO:0044425,GO:0051234,GO:…	system development,plasma membrane part,multicellular organismal development,single-organism process,organ development,single-organism developmental process,anatomical structure development,chromosomal part,single-organism cellular process,chromosome,developmental process,cellular_component,protein binding,localization,cellular component movement,single-multicellular organism process,cell periphe…	--	--
ENSOCUT00000022105	ENSOCUG00000026587	-	GL019438:78217-78833	0	2.28482	#NAME?	5e-05	0.00164462	--	--	--	--	--
ENSOCUT00000026731	ENSOCUG00000022410	-	12:10851268-10851679	43.8623	256.419	-2.54745	5e-05	0.00164462	--	GO:0000786,GO:0032993,GO:0046982,GO:0046983,GO:0000785,GO:0044427,GO:0005694,GO:0005575,GO:0005515,GO:0005488,GO:0043228,GO:0043232,GO:0003677,GO:0043226,GO:0043227,GO:0005623,GO:0044464,GO:0003674,GO:0044424,GO:0044422,GO:0044446,GO:0005622,GO:0032991,GO:0043229,GO:0043231,GO:0005634,GO:1901363,GO:0097159,GO:0003676	nucleosome,protein-DNA complex,protein heterodimerization activity,protein dimerization activity,chromatin,chromosomal part,chromosome,cellular_component,protein binding,binding,non-membrane-bounded organelle,intracellular non-membrane-bounded organelle,DNA binding,organelle,membrane-bounded organelle,cell,cell part,molecular_function,intracellular part,organelle part,intracellular organelle part…	ocu05322,ocu05034,ocu05202	Systemic lupus erythematosus,Alcoholism,Transcriptional misregulation in cancer
ENSOCUT00000002339	ENSOCUG00000002341	CAPG	2:100838856-100848299	138.892	18.509	2.90766	5e-05	0.00164462	capping actin protein, gelsolin like [Source:HGNC Symbol;Acc:HGNC:1474]	GO:0044421,GO:0005576,GO:0031982,GO:0031988,GO:0070062,GO:0043230,GO:0065010,GO:0044699,GO:0044763,GO:0005575,GO:0005515,GO:0048519,GO:0048523,GO:0005488,GO:0043228,GO:0043232,GO:0065007,GO:0050794,GO:0005856,GO:0050789,GO:0044430,GO:0072686,GO:0030496,GO:0019904,GO:0005819,GO:0016043,GO:0065008,GO:0071840,GO:0005813,GO:0043226,GO:0008150,GO:0015630,GO:0043227,GO:0007010,GO:0032403,GO:0022411,GO:…	extracellular region part,extracellular region,vesicle,membrane-bounded vesicle,extracellular vesicular exosome,extracellular organelle,extracellular membrane-bounded organelle,single-organism process,single-organism cellular process,cellular_component,protein binding,negative regulation of biological process,negative regulation of cellular process,binding,non-membrane-bounded organelle,intracell…	--	--
ENSOCUT00000004962	ENSOCUG00000004959	HHIP	15:19932580-20030843	4.89851	36.9116	-2.91366	5e-05	0.00164462	hedgehog interacting protein [Source:HGNC Symbol;Acc:HGNC:14866]	GO:0009986,GO:0050896,GO:0070887,GO:0010033,GO:0048731,GO:0044459,GO:0007275,GO:0044699,GO:0048513,GO:0044767,GO:0048856,GO:0044763,GO:0048583,GO:0032502,GO:0005575,GO:0008283,GO:0005515,GO:0042221,GO:0071310,GO:0048519,GO:0030154,GO:0044707,GO:0048523,GO:0071944,GO:0032501,GO:0051716,GO:0005886,GO:0048869,GO:0009966,GO:0023051,GO:0005488,GO:0010646,GO:0016020,GO:0048585,GO:0065007,GO:0016021,GO:…	cell surface,response to stimulus,cellular response to chemical stimulus,response to organic substance,system development,plasma membrane part,multicellular organismal development,single-organism process,organ development,single-organism developmental process,anatomical structure development,single-organism cellular process,regulation of response to stimulus,developmental process,cellular_compone…	ocu05200,ocu04024,ocu05217,ocu04340	Pathways in cancer,cAMP signaling pathway,Basal cell carcinoma,Hedgehog signaling pathway
ENSOCUT00000031563	ENSOCUG00000027003	-	12:10944652-10945033	273.469	1082.18	-1.98449	5e-05	0.00164462	--	GO:0000786,GO:0032993,GO:0046982,GO:0046983,GO:0000785,GO:0044427,GO:0005694,GO:0005575,GO:0005515,GO:0005488,GO:0043228,GO:0043232,GO:0003677,GO:0043226,GO:0043227,GO:0005623,GO:0044464,GO:0003674,GO:0044424,GO:0044422,GO:0044446,GO:0005622,GO:0032991,GO:0043229,GO:0043231,GO:0005634,GO:1901363,GO:0097159,GO:0003676	nucleosome,protein-DNA complex,protein heterodimerization activity,protein dimerization activity,chromatin,chromosomal part,chromosome,cellular_component,protein binding,binding,non-membrane-bounded organelle,intracellular non-membrane-bounded organelle,DNA binding,organelle,membrane-bounded organelle,cell,cell part,molecular_function,intracellular part,organelle part,intracellular organelle part…	ocu05322,ocu05034,ocu05203	Systemic lupus erythematosus,Alcoholism,Viral carcinogenesis
ENSOCUT00000014547	ENSOCUG00000014540	RHBDF2	GL018843:259105-273332	19.822	4.52203	2.13206	5e-05	0.00164462	rhomboid 5 homolog 2 [Source:HGNC Symbol;Acc:HGNC:20788]	GO:0044699,GO:0044763,GO:0005575,GO:0009306,GO:0048519,GO:0051179,GO:0032940,GO:0032879,GO:0048523,GO:0071944,GO:0050708,GO:0005886,GO:0046903,GO:0051223,GO:0032880,GO:0051049,GO:0051048,GO:0051051,GO:0070201,GO:0060341,GO:0016020,GO:0065007,GO:0051046,GO:0016021,GO:0044765,GO:0031224,GO:0050794,GO:0050709,GO:0050789,GO:0044425,GO:0051234,GO:0006810,GO:0071702,GO:0033036,GO:0051224,GO:0016787,GO:…	single-organism process,single-organism cellular process,cellular_component,protein secretion,negative regulation of biological process,localization,secretion by cell,regulation of localization,negative regulation of cellular process,cell periphery,regulation of protein secretion,plasma membrane,secretion,regulation of protein transport,regulation of protein localization,regulation of transport,n…	--	--
ENSOCUT00000014022	ENSOCUG00000014011	GRIP1	4:45257743-45511274	0.25852	3.74658	-3.85723	5e-05	0.00164462	glutamate receptor interacting protein 1 [Source:HGNC Symbol;Acc:HGNC:18708]	GO:0048731,GO:0007275,GO:0044699,GO:0044767,GO:0048856,GO:0044763,GO:0032502,GO:0005575,GO:0005515,GO:0051179,GO:0030154,GO:0044707,GO:0071944,GO:0032501,GO:0005886,GO:0048869,GO:0005102,GO:0005488,GO:0016020,GO:0045121,GO:0044425,GO:0033036,GO:0016043,GO:0071840,GO:0008104,GO:0043226,GO:0008150,GO:0043227,GO:0048666,GO:0005623,GO:0044464,GO:0043005,GO:0005737,GO:0005768,GO:0009987,GO:0031175,GO:…	system development,multicellular organismal development,single-organism process,single-organism developmental process,anatomical structure development,single-organism cellular process,developmental process,cellular_component,protein binding,localization,cell differentiation,single-multicellular organism process,cell periphery,multicellular organismal process,plasma membrane,cellular developmental…	--	--
ENSOCUT00000025141	ENSOCUG00000014740	SLC37A2	1:92172946-92199442	73.4154	4.00511	4.19617	5e-05	0.00164462	solute carrier family 37 member 2 [Source:HGNC Symbol;Acc:HGNC:20644]	GO:0044421,GO:0005576,GO:0031982,GO:0031988,GO:0070062,GO:0043230,GO:0065010,GO:0044699,GO:0044763,GO:0005575,GO:0051179,GO:0016020,GO:0016021,GO:0044765,GO:0031224,GO:0044425,GO:0051234,GO:0006810,GO:0071702,GO:0006820,GO:1901264,GO:1901505,GO:0043226,GO:0015748,GO:0008150,GO:0043227,GO:0006811,GO:0005623,GO:0044464,GO:0005737,GO:0009987,GO:0022804,GO:0005215,GO:0003674,GO:0015119,GO:0015315,GO:…	extracellular region part,extracellular region,vesicle,membrane-bounded vesicle,extracellular vesicular exosome,extracellular organelle,extracellular membrane-bounded organelle,single-organism process,single-organism cellular process,cellular_component,localization,membrane,integral to membrane,single-organism transport,intrinsic to membrane,membrane part,establishment of localization,transport,o…	--	--
ENSOCUT00000032174	ENSOCUG00000027626	CD247	13:25457776-25540068	1.6271	129.31	-6.31239	5e-05	0.00164462	T-cell surface glycoprotein CD3 zeta chain precursor [Source:RefSeq peptide;Acc:NP_001075471]	GO:0002376,GO:0006955,GO:0002682,GO:0002684,GO:0050896,GO:0048584,GO:0050778,GO:0044459,GO:0050776,GO:0048518,GO:0044699,GO:0002764,GO:0002757,GO:0044763,GO:0002253,GO:0048583,GO:0005575,GO:0005515,GO:0002768,GO:0071944,GO:0050851,GO:0002429,GO:0051716,GO:0005886,GO:0050852,GO:0005488,GO:0016020,GO:0065007,GO:0016021,GO:0031224,GO:0050794,GO:0007165,GO:0050789,GO:0044425,GO:0042101,GO:0007154,GO:…	immune system process,immune response,regulation of immune system process,positive regulation of immune system process,response to stimulus,positive regulation of response to stimulus,positive regulation of immune response,plasma membrane part,regulation of immune response,positive regulation of biological process,single-organism process,immune response-regulating signaling pathway,immune respons…	ocu04660,ocu05142,ocu04650	T cell receptor signaling pathway,Chagas disease (American trypanosomiasis),Natural killer cell mediated cytotoxicity
ENSOCUT00000003297	ENSOCUG00000003299	DMRT2	1:53596577-53602701	0.351464	4.28894	-3.60917	5e-05	0.00164462	doublesex and mab-3 related transcription factor 2 [Source:HGNC Symbol;Acc:HGNC:2935]	GO:0051239,GO:0048731,GO:0007275,GO:0046983,GO:0048518,GO:0044699,GO:0044767,GO:0048856,GO:0048522,GO:0032502,GO:2000026,GO:0005575,GO:0005515,GO:0044707,GO:0051094,GO:0032501,GO:0050793,GO:0005488,GO:0065007,GO:0050794,GO:0050789,GO:0009653,GO:0042803,GO:0003677,GO:0048646,GO:0042802,GO:0009893,GO:0043226,GO:0022603,GO:0008150,GO:0043227,GO:0031325,GO:0010604,GO:0005623,GO:0044464,GO:0009987,GO:…	regulation of multicellular organismal process,system development,multicellular organismal development,protein dimerization activity,positive regulation of biological process,single-organism process,single-organism developmental process,anatomical structure development,positive regulation of cellular process,developmental process,regulation of multicellular organismal development,cellular_compone…	--	--
ENSOCUT00000013588	ENSOCUG00000013587	IL10RA	GL018782:120516-130396	33.2099	6.98915	2.24842	5e-05	0.00164462	interleukin 10 receptor subunit alpha [Source:HGNC Symbol;Acc:HGNC:5964]	GO:0005575,GO:0005515,GO:0005488,GO:0016020,GO:0016021,GO:0031224,GO:0044425,GO:0003674	cellular_component,protein binding,binding,membrane,integral to membrane,intrinsic to membrane,membrane part,molecular_function	ocu04060,ocu05152,ocu05145,ocu04630,ocu05169	Cytokine-cytokine receptor interaction,Tuberculosis,Toxoplasmosis,Jak-STAT signaling pathway,Epstein-Barr virus infection
ENSOCUT00000009492	ENSOCUG00000009489	-	17:37760082-37856624	2.06709	7.49531	-1.85839	5e-05	0.00164462	Rho GTPase activating protein 11A [Source:HGNC Symbol;Acc:HGNC:15783]	GO:0050896,GO:0031982,GO:0031988,GO:0044699,GO:0044763,GO:0005575,GO:0051716,GO:0065007,GO:0050794,GO:0007165,GO:0050789,GO:0031410,GO:0007154,GO:0016023,GO:0044700,GO:0023052,GO:0007166,GO:0043226,GO:0008150,GO:0043227,GO:0030141,GO:0005623,GO:0044464,GO:0005737,GO:0009987,GO:0044424,GO:0005622,GO:0043229,GO:0007218,GO:0043231,GO:0044444,GO:0007186	response to stimulus,vesicle,membrane-bounded vesicle,single-organism process,single-organism cellular process,cellular_component,cellular response to stimulus,biological regulation,regulation of cellular process,signal transduction,regulation of biological process,cytoplasmic vesicle,cell communication,cytoplasmic membrane-bounded vesicle,single organism signaling,signaling,cell surface receptor…	--	--
ENSOCUT00000006642	ENSOCUG00000006641	EPB41	13:136463872-136693226	21.1789	70.0378	-1.72551	5e-05	0.00164462	erythrocyte membrane protein band 4.1 [Source:HGNC Symbol;Acc:HGNC:3377]	GO:0044699,GO:0044763,GO:0005575,GO:0005515,GO:0071944,GO:0005886,GO:0005488,GO:0016020,GO:0043228,GO:0043232,GO:0065007,GO:0044093,GO:0005856,GO:0044425,GO:0065009,GO:0051098,GO:0043393,GO:0030054,GO:0051099,GO:0016043,GO:0071840,GO:0043226,GO:0008150,GO:0043168,GO:0032092,GO:0007010,GO:0005623,GO:0044464,GO:0005737,GO:0009987,GO:0008289,GO:0008092,GO:0043167,GO:0003674,GO:0044448,GO:0044424,GO:…	single-organism process,single-organism cellular process,cellular_component,protein binding,cell periphery,plasma membrane,binding,membrane,non-membrane-bounded organelle,intracellular non-membrane-bounded organelle,biological regulation,positive regulation of molecular function,cytoskeleton,membrane part,regulation of molecular function,regulation of binding,regulation of protein binding,cell ju…	ocu04530	Tight junction
ENSOCUT00000008136	ENSOCUG00000008137	MLLT3	1:33250136-33578265	9.1166	31.9615	-1.80977	5e-05	0.00164462	myeloid/lymphoid or mixed-lineage leukemia; translocated to, 3 [Source:HGNC Symbol;Acc:HGNC:7136]	GO:0044421,GO:0005576,GO:0051239,GO:0050896,GO:0031982,GO:0031988,GO:0048584,GO:0048731,GO:0007275,GO:0070062,GO:0043230,GO:0065010,GO:0048518,GO:0044699,GO:0048513,GO:0044767,GO:0048856,GO:0044763,GO:0048522,GO:0048583,GO:0032502,GO:2000026,GO:0005575,GO:0005515,GO:0048519,GO:0044707,GO:0048523,GO:0032501,GO:0051716,GO:0023056,GO:0009967,GO:0050793,GO:0010647,GO:0009966,GO:0023051,GO:0005488,GO:…	extracellular region part,extracellular region,regulation of multicellular organismal process,response to stimulus,vesicle,membrane-bounded vesicle,positive regulation of response to stimulus,system development,multicellular organismal development,extracellular vesicular exosome,extracellular organelle,extracellular membrane-bounded organelle,positive regulation of biological process,single-organ…	ocu05202	Transcriptional misregulation in cancer
ENSOCUT00000030655	ENSOCUG00000028024	IFGGD1	3:32509403-32510666	4.66346	32.2066	-2.78788	5e-05	0.00164462	--	GO:0005575,GO:0005488,GO:0016020,GO:0016021,GO:0031224,GO:0044425,GO:0043168,GO:0035639,GO:0032555,GO:0032550,GO:0001883,GO:0017076,GO:0032549,GO:0001882,GO:0032553,GO:0043167,GO:0003674,GO:0036094,GO:0000166,GO:1901265,GO:1901363,GO:0097159,GO:0032561,GO:0019001,GO:0005525	cellular_component,binding,membrane,integral to membrane,intrinsic to membrane,membrane part,anion binding,purine ribonucleoside triphosphate binding,purine ribonucleotide binding,purine ribonucleoside binding,purine nucleoside binding,purine nucleotide binding,ribonucleoside binding,nucleoside binding,ribonucleotide binding,ion binding,molecular_function,small molecule binding,nucleotide binding…	ocu05145	Toxoplasmosis
ENSOCUT00000027240	ENSOCUG00000020917	PIK3AP1	GL018967:52673-113788	48.2988	8.42046	2.52002	5e-05	0.00164462	phosphoinositide-3-kinase adaptor protein 1 [Source:HGNC Symbol;Acc:HGNC:30034]	GO:0002376,GO:0006955,GO:0002682,GO:0002684,GO:0006952,GO:0050896,GO:0006950,GO:0048584,GO:0050778,GO:0050776,GO:0006954,GO:0048518,GO:0044699,GO:0009611,GO:0002764,GO:0002757,GO:0044763,GO:0002253,GO:0048522,GO:0045087,GO:0048583,GO:0009605,GO:0005575,GO:0005515,GO:0031349,GO:0048519,GO:0048523,GO:0071944,GO:0045089,GO:0051716,GO:0023056,GO:0009967,GO:0010647,GO:0005886,GO:0045088,GO:0032101,GO:…	immune system process,immune response,regulation of immune system process,positive regulation of immune system process,defense response,response to stimulus,response to stress,positive regulation of response to stimulus,positive regulation of immune response,regulation of immune response,inflammatory response,positive regulation of biological process,single-organism process,response to wounding,i…	ocu04151,ocu04662	PI3K-Akt signaling pathway,B cell receptor signaling pathway
ENSOCUT00000011025	ENSOCUG00000011027	CHIT1	16:68560130-68570017	30.4311	1.9125	3.99201	5e-05	0.00164462	chitinase 1 [Source:HGNC Symbol;Acc:HGNC:1936]	GO:0044421,GO:0005576,GO:0005615,GO:0005575,GO:0097367,GO:0005488,GO:0046348,GO:1901072,GO:0004553,GO:0016787,GO:1901071,GO:0016798,GO:0006026,GO:0004568,GO:0006030,GO:0006032,GO:0008150,GO:0006040,GO:0006022,GO:0008061,GO:0008843,GO:1901565,GO:0003674,GO:1901575,GO:1901136,GO:0009056,GO:1901135,GO:1901564,GO:0003824,GO:0005975,GO:0044238,GO:0071704,GO:0009057,GO:0006807,GO:0043170,GO:0008152	extracellular region part,extracellular region,extracellular space,cellular_component,carbohydrate derivative binding,binding,amino sugar catabolic process,glucosamine-containing compound catabolic process,hydrolase activity, hydrolyzing O-glycosyl compounds,hydrolase activity,glucosamine-containing compound metabolic process,hydrolase activity, acting on glycosyl bonds,aminoglycan catabolic proc…	ocu00520	Amino sugar and nucleotide sugar metabolism
ENSOCUT00000022392	ENSOCUG00000025012	ANGPT4	4:8376972-8406467	41.5748	10.1454	2.03489	5e-05	0.00164462	angiopoietin 4 [Source:HGNC Symbol;Acc:HGNC:487]	GO:0044421,GO:0005576,GO:0051239,GO:0050896,GO:0070887,GO:0006950,GO:0048731,GO:0007275,GO:0048518,GO:0044699,GO:0005615,GO:0044767,GO:0048856,GO:0040017,GO:0044763,GO:0051272,GO:0016477,GO:0048522,GO:0030335,GO:0032502,GO:2000026,GO:0005575,GO:2000147,GO:0005515,GO:0040011,GO:0042221,GO:0048870,GO:0051674,GO:0048519,GO:0051179,GO:0040012,GO:0030334,GO:0006928,GO:0044707,GO:2000145,GO:0032879,GO:…	extracellular region part,extracellular region,regulation of multicellular organismal process,response to stimulus,cellular response to chemical stimulus,response to stress,system development,multicellular organismal development,positive regulation of biological process,single-organism process,extracellular space,single-organism developmental process,anatomical structure development,positive regu…	ocu04151,ocu04066,ocu04015,ocu04014	PI3K-Akt signaling pathway,HIF-1 signaling pathway,Rap1 signaling pathway,Ras signaling pathway
ENSOCUT00000011795	ENSOCUG00000011799	FAM221A	10:8697240-8722262	2.78234	29.0523	-3.38428	5e-05	0.00164462	family with sequence similarity 221 member A [Source:HGNC Symbol;Acc:HGNC:27977]	--	--	--	--
ENSOCUT00000023040	ENSOCUG00000025659	HIST1H3J	GL018747:666800-667211	22.2965	307.251	-3.78453	5e-05	0.00164462	--	GO:0000786,GO:0032993,GO:0046982,GO:0046983,GO:0000785,GO:0044427,GO:0005694,GO:0005575,GO:0005515,GO:0005488,GO:0043228,GO:0043232,GO:0003677,GO:0043226,GO:0043227,GO:0005623,GO:0044464,GO:0003674,GO:0044424,GO:0044422,GO:0044446,GO:0005622,GO:0032991,GO:0043229,GO:0043231,GO:0005634,GO:1901363,GO:0097159,GO:0003676	nucleosome,protein-DNA complex,protein heterodimerization activity,protein dimerization activity,chromatin,chromosomal part,chromosome,cellular_component,protein binding,binding,non-membrane-bounded organelle,intracellular non-membrane-bounded organelle,DNA binding,organelle,membrane-bounded organelle,cell,cell part,molecular_function,intracellular part,organelle part,intracellular organelle part…	ocu05322,ocu05034,ocu05202	Systemic lupus erythematosus,Alcoholism,Transcriptional misregulation in cancer
ENSOCUT00000005729	ENSOCUG00000005729	RIN3	20:13366676-13474910	13.9183	3.0429	2.19346	5e-05	0.00164462	Ras and Rab interactor 3 [Source:HGNC Symbol;Acc:HGNC:18751]	GO:0031982,GO:0005575,GO:0005515,GO:0005488,GO:0031410,GO:0043226,GO:0043227,GO:0019899,GO:0017137,GO:0005623,GO:0044464,GO:0005737,GO:0005768,GO:0031267,GO:0017016,GO:0051020,GO:0003674,GO:0044424,GO:0005769,GO:0005085,GO:0005622,GO:0043229,GO:0030234,GO:0005083,GO:0005088,GO:0030695,GO:0043231,GO:0044444,GO:0060589,GO:0017112	vesicle,cellular_component,protein binding,binding,cytoplasmic vesicle,organelle,membrane-bounded organelle,enzyme binding,Rab GTPase binding,cell,cell part,cytoplasm,endosome,small GTPase binding,Ras GTPase binding,GTPase binding,molecular_function,intracellular part,early endosome,guanyl-nucleotide exchange factor activity,intracellular,intracellular organelle,enzyme regulator activity,small GT…	--	--
ENSOCUT00000022808	ENSOCUG00000006497	PXDN	GL019082:135371-175484	66.3407	16.8427	1.97777	5e-05	0.00164462	peroxidasin [Source:HGNC Symbol;Acc:HGNC:14966]	GO:0044421,GO:0005576,GO:0050896,GO:0070887,GO:0031982,GO:0031988,GO:0006950,GO:0070062,GO:0043230,GO:0065010,GO:0044699,GO:0005615,GO:0031012,GO:0044763,GO:0005575,GO:0042221,GO:1901700,GO:0051716,GO:0005488,GO:1901701,GO:0005201,GO:0030198,GO:0043062,GO:0016043,GO:0010035,GO:0071840,GO:0043226,GO:0008150,GO:0043227,GO:0005623,GO:0044464,GO:0072593,GO:0005737,GO:0044710,GO:0009987,GO:0033554,GO:…	extracellular region part,extracellular region,response to stimulus,cellular response to chemical stimulus,vesicle,membrane-bounded vesicle,response to stress,extracellular vesicular exosome,extracellular organelle,extracellular membrane-bounded organelle,single-organism process,extracellular space,extracellular matrix,single-organism cellular process,cellular_component,response to chemical stimu…	--	--
ENSOCUT00000016328	ENSOCUG00000016337	-	GL018989:178517-193661	7.03391	0.547006	3.6847	5e-05	0.00164462	--	GO:0005575,GO:0016020,GO:0016021,GO:0031224,GO:0044425	cellular_component,membrane,integral to membrane,intrinsic to membrane,membrane part	--	--
ENSOCUT00000008304	ENSOCUG00000008303	MMP12	1:113690094-113701956	880.362	6.26276	7.13515	5e-05	0.00164462	matrix metallopeptidase 12 [Source:HGNC Symbol;Acc:HGNC:7158]	GO:0050896,GO:0006950,GO:0048518,GO:0044699,GO:0009611,GO:0044767,GO:0048856,GO:0031012,GO:0044763,GO:0016477,GO:0048522,GO:0032502,GO:0005575,GO:0008283,GO:0040011,GO:0048870,GO:0051674,GO:0051179,GO:0006928,GO:0042127,GO:0008284,GO:0005509,GO:0005488,GO:0065007,GO:0050794,GO:0050789,GO:0009653,GO:0042060,GO:0009888,GO:0048729,GO:0016787,GO:0004175,GO:0002009,GO:0008233,GO:0050673,GO:0070011,GO:…	response to stimulus,response to stress,positive regulation of biological process,single-organism process,response to wounding,single-organism developmental process,anatomical structure development,extracellular matrix,single-organism cellular process,cell migration,positive regulation of cellular process,developmental process,cellular_component,cell proliferation,locomotion,cell motility,localiz…	--	--
ENSOCUT00000008305	ENSOCUG00000008307	-	13:34980686-34984301	1.05526	79.5697	-6.23655	5e-05	0.00164462	--	GO:0002376,GO:0006955,GO:0050896,GO:0005575,GO:0016020,GO:0016021,GO:0031224,GO:0044425,GO:0008150	immune system process,immune response,response to stimulus,cellular_component,membrane,integral to membrane,intrinsic to membrane,membrane part,biological_process	ocu04640	Hematopoietic cell lineage
ENSOCUT00000030750	ENSOCUG00000001353	-	2:30395305-30409319	9.24016	50.429	-2.44826	5e-05	0.00164462	--	GO:0005575,GO:0016787,GO:0008233,GO:0070011,GO:0008150,GO:0005623,GO:0044464,GO:0006508,GO:0009987,GO:0006464,GO:0036211,GO:0043412,GO:0003674,GO:1901575,GO:0008234,GO:0019538,GO:0009056,GO:0005622,GO:0003824,GO:0044248,GO:0044267,GO:0044257,GO:0044238,GO:0071704,GO:0051603,GO:0030163,GO:0009057,GO:0043170,GO:0016579,GO:0019783,GO:0070646,GO:0008152,GO:0004843,GO:0044265,GO:0016874,GO:0044237,GO:…	cellular_component,hydrolase activity,peptidase activity,peptidase activity, acting on L-amino acid peptides,biological_process,cell,cell part,proteolysis,cellular process,cellular protein modification process,protein modification process,macromolecule modification,molecular_function,organic substance catabolic process,cysteine-type peptidase activity,protein metabolic process,catabolic process,i…	ocu05012	Parkinson's disease
ENSOCUT00000010251	ENSOCUG00000010254	-	9:50740448-51088848	20.8022	4.14698	2.3266	5e-05	0.00164462	--	GO:0044699,GO:0044763,GO:0005575,GO:0051179,GO:0016020,GO:0016021,GO:0044765,GO:0031224,GO:0044425,GO:0051234,GO:0006810,GO:0008150,GO:0008381,GO:0022833,GO:0006811,GO:0009987,GO:0005215,GO:0003674,GO:0034220,GO:0022857,GO:0055085,GO:0022891,GO:0022892,GO:0015075,GO:0015267,GO:0022803,GO:0022836,GO:0022839,GO:0022838,GO:0005216	single-organism process,single-organism cellular process,cellular_component,localization,membrane,integral to membrane,single-organism transport,intrinsic to membrane,membrane part,establishment of localization,transport,biological_process,mechanically-gated ion channel activity,mechanically gated channel activity,ion transport,cellular process,transporter activity,molecular_function,ion transmem…	--	--
ENSOCUT00000028358	ENSOCUG00000025069	-	12:11020426-11020819	28.1878	269	-3.25446	5e-05	0.00164462	--	GO:0000786,GO:0032993,GO:0046982,GO:0046983,GO:0000785,GO:0044427,GO:0005694,GO:0005575,GO:0005515,GO:0005488,GO:0043228,GO:0043232,GO:0003677,GO:0043226,GO:0043227,GO:0005623,GO:0044464,GO:0003674,GO:0044424,GO:0044422,GO:0044446,GO:0005622,GO:0032991,GO:0043229,GO:0043231,GO:0005634,GO:1901363,GO:0097159,GO:0003676	nucleosome,protein-DNA complex,protein heterodimerization activity,protein dimerization activity,chromatin,chromosomal part,chromosome,cellular_component,protein binding,binding,non-membrane-bounded organelle,intracellular non-membrane-bounded organelle,DNA binding,organelle,membrane-bounded organelle,cell,cell part,molecular_function,intracellular part,organelle part,intracellular organelle part…	ocu05322,ocu05034	Systemic lupus erythematosus,Alcoholism
ENSOCUT00000008407	ENSOCUG00000008408	ATF7IP2	6:4187342-4274184	0.842781	7.34715	-3.12395	5e-05	0.00164462	activating transcription factor 7 interacting protein 2 [Source:HGNC Symbol;Acc:HGNC:20397]	GO:0005575,GO:0043228,GO:0043232,GO:0043226,GO:0043227,GO:0005623,GO:0044464,GO:0005737,GO:0044424,GO:0044422,GO:0044446,GO:0005622,GO:0043229,GO:0043231,GO:0005634,GO:0005730,GO:0031981,GO:0031974,GO:0070013,GO:0043233,GO:0044428	cellular_component,non-membrane-bounded organelle,intracellular non-membrane-bounded organelle,organelle,membrane-bounded organelle,cell,cell part,cytoplasm,intracellular part,organelle part,intracellular organelle part,intracellular,intracellular organelle,intracellular membrane-bounded organelle,nucleus,nucleolus,nuclear lumen,membrane-enclosed lumen,intracellular organelle lumen,organelle lume…	--	--
ENSOCUT00000009756	ENSOCUG00000009751	HCK	4:7202138-7244423	22.4801	3.93715	2.51343	5e-05	0.00164462	HCK proto-oncogene, Src family tyrosine kinase [Source:HGNC Symbol;Acc:HGNC:4840]	GO:0018108,GO:0018212,GO:0006468,GO:0005488,GO:0016310,GO:0018193,GO:0004713,GO:0004715,GO:0006793,GO:0008150,GO:0043168,GO:0006796,GO:0032559,GO:0030554,GO:0005524,GO:0035639,GO:0032555,GO:0032550,GO:0001883,GO:0017076,GO:0032549,GO:0001882,GO:0032553,GO:0009987,GO:0004672,GO:0016773,GO:0006464,GO:0036211,GO:0016301,GO:0043167,GO:0043412,GO:0003674,GO:0016772,GO:0019538,GO:0036094,GO:0003824,GO:…	peptidyl-tyrosine phosphorylation,peptidyl-tyrosine modification,protein phosphorylation,binding,phosphorylation,peptidyl-amino acid modification,protein tyrosine kinase activity,non-membrane spanning protein tyrosine kinase activity,phosphorus metabolic process,biological_process,anion binding,phosphate-containing compound metabolic process,adenyl ribonucleotide binding,adenyl nucleotide binding…	ocu04062,ocu04666	Chemokine signaling pathway,Fc gamma R-mediated phagocytosis
ENSOCUT00000027978	ENSOCUG00000027953	-	12:10804468-10804849	42.1905	459.338	-3.44457	5e-05	0.00164462	--	GO:0000786,GO:0032993,GO:0046982,GO:0046983,GO:0000785,GO:0044427,GO:0005694,GO:0005575,GO:0005515,GO:0005488,GO:0043228,GO:0043232,GO:0003677,GO:0043226,GO:0043227,GO:0005623,GO:0044464,GO:0003674,GO:0044424,GO:0044422,GO:0044446,GO:0005622,GO:0032991,GO:0043229,GO:0043231,GO:0005634,GO:1901363,GO:0097159,GO:0003676	nucleosome,protein-DNA complex,protein heterodimerization activity,protein dimerization activity,chromatin,chromosomal part,chromosome,cellular_component,protein binding,binding,non-membrane-bounded organelle,intracellular non-membrane-bounded organelle,DNA binding,organelle,membrane-bounded organelle,cell,cell part,molecular_function,intracellular part,organelle part,intracellular organelle part…	ocu05322,ocu05034,ocu05203	Systemic lupus erythematosus,Alcoholism,Viral carcinogenesis
ENSOCUT00000006833	ENSOCUG00000006833	-	9:24158189-24335217	0.121152	6.54374	-5.75522	5e-05	0.00164462	--	GO:0044699,GO:0044763,GO:0005575,GO:0006928,GO:0005488,GO:0043228,GO:0043232,GO:0005856,GO:0044430,GO:0003774,GO:0003777,GO:0016787,GO:0043226,GO:0008150,GO:0043168,GO:0015630,GO:0032559,GO:0030554,GO:0005524,GO:0007017,GO:0005623,GO:0044464,GO:0035639,GO:0032555,GO:0032550,GO:0001883,GO:0017076,GO:0032549,GO:0001882,GO:0032553,GO:0009987,GO:0007018,GO:0017111,GO:0043167,GO:0016462,GO:0016818,GO:…	single-organism process,single-organism cellular process,cellular_component,cellular component movement,binding,non-membrane-bounded organelle,intracellular non-membrane-bounded organelle,cytoskeleton,cytoskeletal part,motor activity,microtubule motor activity,hydrolase activity,organelle,biological_process,anion binding,microtubule cytoskeleton,adenyl ribonucleotide binding,adenyl nucleotide bin…	ocu05016	Huntington's disease
ENSOCUT00000026781	ENSOCUG00000024755	TYROBP	GL018786:689096-694646	50.9717	5.43524	3.22928	5e-05	0.00164462	TYRO protein tyrosine kinase binding protein [Source:HGNC Symbol;Acc:HGNC:12449]	GO:0002376,GO:0006955,GO:0045321,GO:0001775,GO:0002682,GO:0002521,GO:0002520,GO:0030097,GO:0048534,GO:0009986,GO:0051239,GO:0050896,GO:0048731,GO:0007275,GO:0044699,GO:0048513,GO:0044767,GO:0048856,GO:0044763,GO:0032502,GO:2000026,GO:0005575,GO:0005515,GO:1902105,GO:0030154,GO:0044707,GO:0032501,GO:0051716,GO:0050793,GO:0048869,GO:0002252,GO:0030099,GO:0005102,GO:0002573,GO:0005488,GO:0002366,GO:…	immune system process,immune response,leukocyte activation,cell activation,regulation of immune system process,leukocyte differentiation,immune system development,hemopoiesis,hematopoietic or lymphoid organ development,cell surface,regulation of multicellular organismal process,response to stimulus,system development,multicellular organismal development,single-organism process,organ development,s…	ocu04380,ocu04650	Osteoclast differentiation,Natural killer cell mediated cytotoxicity
ENSOCUT00000017125	ENSOCUG00000017111	-	X:48850994-48981065	1.91859	10.8751	-2.50292	5e-05	0.00164462	--	GO:0044699,GO:0044763,GO:0005515,GO:0006928,GO:0005488,GO:0003774,GO:0003777,GO:0016787,GO:0008150,GO:0043168,GO:0032559,GO:0030554,GO:0005524,GO:0007017,GO:0008017,GO:0035639,GO:0032555,GO:0032550,GO:0001883,GO:0017076,GO:0032549,GO:0001882,GO:0032553,GO:0009987,GO:0008092,GO:0007018,GO:0017111,GO:0043167,GO:0016462,GO:0016818,GO:0003674,GO:0016817,GO:0015631,GO:0036094,GO:0003824,GO:0000166,GO:…	single-organism process,single-organism cellular process,protein binding,cellular component movement,binding,motor activity,microtubule motor activity,hydrolase activity,biological_process,anion binding,adenyl ribonucleotide binding,adenyl nucleotide binding,ATP binding,microtubule-based process,microtubule binding,purine ribonucleoside triphosphate binding,purine ribonucleotide binding,purine ri…	--	--
ENSOCUT00000030389	ENSOCUG00000014287	SLC38A6	20:8554799-8626851	21.8954	5.4297	2.01169	5e-05	0.00164462	solute carrier family 38 member 6 [Source:HGNC Symbol;Acc:HGNC:19863]	GO:0005575,GO:0071944,GO:0005886,GO:0016020,GO:0016021,GO:0031224,GO:0044425,GO:0005623,GO:0044464	cellular_component,cell periphery,plasma membrane,membrane,integral to membrane,intrinsic to membrane,membrane part,cell,cell part	--	--
ENSOCUT00000023334	ENSOCUG00000025850	IL2RG	X:49578263-49581035	14.5988	96.3552	-2.72251	5e-05	0.00164462	--	GO:0050896,GO:0070887,GO:0010033,GO:0044699,GO:0034097,GO:0044763,GO:0005575,GO:0005515,GO:0042221,GO:0071310,GO:0071345,GO:0051716,GO:0005488,GO:0004896,GO:0016020,GO:0065007,GO:0016021,GO:0031224,GO:0050794,GO:0007165,GO:0050789,GO:0044425,GO:0019221,GO:0007154,GO:0044700,GO:0023052,GO:0007166,GO:0008150,GO:0009987,GO:0003674,GO:0004872,GO:0004871,GO:0060089,GO:0038023,GO:0004888	response to stimulus,cellular response to chemical stimulus,response to organic substance,single-organism process,response to cytokine stimulus,single-organism cellular process,cellular_component,protein binding,response to chemical stimulus,cellular response to organic substance,cellular response to cytokine stimulus,cellular response to stimulus,binding,cytokine receptor activity,membrane,biolo…	ocu05340,ocu04060,ocu04151,ocu05162,ocu05321,ocu05166,ocu04630,ocu04144	Primary immunodeficiency,Cytokine-cytokine receptor interaction,PI3K-Akt signaling pathway,Measles,Inflammatory bowel disease (IBD),HTLV-I infection,Jak-STAT signaling pathway,Endocytosis
ENSOCUT00000027545	ENSOCUG00000023649	-	X:69801385-69804202	4.39705	0.355694	3.62783	5e-05	0.00164462	--	GO:0002376,GO:0006955,GO:0002682,GO:0002684,GO:0006952,GO:0050896,GO:0006950,GO:0048584,GO:0050778,GO:0050776,GO:0046983,GO:0048518,GO:0044699,GO:0002764,GO:0051707,GO:0009607,GO:0002757,GO:0044763,GO:0002253,GO:0045087,GO:0048583,GO:0005575,GO:0005515,GO:0031349,GO:0051704,GO:0045089,GO:0051716,GO:0007243,GO:0045088,GO:0009966,GO:0010627,GO:0031347,GO:0023051,GO:0002224,GO:0005488,GO:0000165,GO:…	immune system process,immune response,regulation of immune system process,positive regulation of immune system process,defense response,response to stimulus,response to stress,positive regulation of response to stimulus,positive regulation of immune response,regulation of immune response,protein dimerization activity,positive regulation of biological process,single-organism process,immune respons…	--	--
ENSOCUT00000021058	ENSOCUG00000025760	MEIS3	GL018835:639112-645010	6.37982	0.763717	3.06241	5e-05	0.00164462	Meis homeobox 3 [Source:HGNC Symbol;Acc:HGNC:29537]	GO:0050896,GO:0048584,GO:0048518,GO:0044699,GO:0044763,GO:0048522,GO:0048583,GO:0005575,GO:0048519,GO:0048523,GO:0051716,GO:0023056,GO:0009967,GO:0010647,GO:0007243,GO:0043067,GO:0042981,GO:0010740,GO:0006915,GO:0009966,GO:0010627,GO:0012501,GO:0008219,GO:0016265,GO:0010941,GO:0023051,GO:0005488,GO:0010646,GO:0048585,GO:0065007,GO:0050794,GO:0035556,GO:0007165,GO:0050789,GO:0003677,GO:0009968,GO:…	response to stimulus,positive regulation of response to stimulus,positive regulation of biological process,single-organism process,single-organism cellular process,positive regulation of cellular process,regulation of response to stimulus,cellular_component,negative regulation of biological process,negative regulation of cellular process,cellular response to stimulus,positive regulation of signal…	--	--
ENSOCUT00000007357	ENSOCUG00000007358	STK26	X:106332358-106386180	9.73046	42.9442	-2.14189	5e-05	0.00164462	serine/threonine protein kinase 26 [Source:HGNC Symbol;Acc:HGNC:18174]	GO:0044421,GO:0005576,GO:0050896,GO:0031982,GO:0031988,GO:0006950,GO:0044459,GO:0046983,GO:0070062,GO:0043230,GO:0065010,GO:0044699,GO:0044763,GO:0005575,GO:0005515,GO:0042221,GO:1901700,GO:0071944,GO:0005886,GO:0043067,GO:0042981,GO:0006915,GO:0012501,GO:0008219,GO:0016265,GO:0010941,GO:0006468,GO:0005488,GO:0016020,GO:0043228,GO:0043232,GO:0065007,GO:0050794,GO:0005856,GO:0050789,GO:0044425,GO:…	extracellular region part,extracellular region,response to stimulus,vesicle,membrane-bounded vesicle,response to stress,plasma membrane part,protein dimerization activity,extracellular vesicular exosome,extracellular organelle,extracellular membrane-bounded organelle,single-organism process,single-organism cellular process,cellular_component,protein binding,response to chemical stimulus,response …	--	--
ENSOCUT00000001216	ENSOCUG00000001216	ADAM8	18:69783568-69791371	18.5915	2.77214	2.74558	5e-05	0.00164462	ADAM metallopeptidase domain 8 [Source:HGNC Symbol;Acc:HGNC:215]	GO:0002376,GO:0006955,GO:0045321,GO:0001775,GO:0002682,GO:0002684,GO:0046649,GO:0002521,GO:0050865,GO:0002694,GO:0002520,GO:0001816,GO:0042110,GO:0030097,GO:0048534,GO:0009986,GO:0051249,GO:0006952,GO:0001817,GO:0051239,GO:0030098,GO:0051251,GO:0050896,GO:0002696,GO:0070887,GO:0050867,GO:0050870,GO:0050863,GO:0031982,GO:0031988,GO:0006950,GO:0048584,GO:0048731,GO:0050778,GO:0044459,GO:0050776,GO:…	immune system process,immune response,leukocyte activation,cell activation,regulation of immune system process,positive regulation of immune system process,lymphocyte activation,leukocyte differentiation,regulation of cell activation,regulation of leukocyte activation,immune system development,cytokine production,T cell activation,hemopoiesis,hematopoietic or lymphoid organ development,cell surfa…	--	--
ENSOCUT00000012772	ENSOCUG00000012761	-	7:98696940-98792842	2.25267	39.7053	-4.13963	5e-05	0.00164462	--	GO:0009986,GO:0044459,GO:0009897,GO:0005575,GO:0071944,GO:0005886,GO:0016020,GO:0016021,GO:0031224,GO:0044425,GO:0005623,GO:0044464	cell surface,plasma membrane part,external side of plasma membrane,cellular_component,cell periphery,plasma membrane,membrane,integral to membrane,intrinsic to membrane,membrane part,cell,cell part	--	--
ENSOCUT00000016648	ENSOCUG00000016642	PROM1	2:6570948-6622803	3.41025	31.0544	-3.18685	5e-05	0.00164462	prominin 1 [Source:HGNC Symbol;Acc:HGNC:9454]	GO:0044421,GO:0005576,GO:0009986,GO:0051239,GO:0031982,GO:0031988,GO:0048731,GO:0044459,GO:0007275,GO:0070062,GO:0043230,GO:0065010,GO:0048518,GO:0044699,GO:0048513,GO:0005615,GO:0044767,GO:0048856,GO:0044763,GO:0048522,GO:0032502,GO:2000026,GO:0005575,GO:0005515,GO:0030154,GO:0044707,GO:0071944,GO:0051094,GO:0032501,GO:0050793,GO:0005886,GO:0048869,GO:0045597,GO:0005488,GO:0016020,GO:0065007,GO:…	extracellular region part,extracellular region,cell surface,regulation of multicellular organismal process,vesicle,membrane-bounded vesicle,system development,plasma membrane part,multicellular organismal development,extracellular vesicular exosome,extracellular organelle,extracellular membrane-bounded organelle,positive regulation of biological process,single-organism process,organ development,e…	ocu05202	Transcriptional misregulation in cancer
ENSOCUT00000001553	ENSOCUG00000001553	LIPA	18:37157992-37199990	301.903	52.195	2.5321	5e-05	0.00164462	lipase A, lysosomal acid type [Source:HGNC Symbol;Acc:HGNC:6617]	GO:0044421,GO:0005576,GO:0001816,GO:0006952,GO:0050896,GO:0031982,GO:0031988,GO:0006950,GO:0048731,GO:0007275,GO:0070062,GO:0043230,GO:0065010,GO:0006954,GO:0044699,GO:0009611,GO:0048513,GO:0044767,GO:0048856,GO:0044763,GO:0032502,GO:0005575,GO:0008283,GO:0044707,GO:0032501,GO:0048869,GO:0065007,GO:0048872,GO:0009653,GO:0016042,GO:0016787,GO:0016043,GO:0006629,GO:0065008,GO:0071840,GO:0043226,GO:…	extracellular region part,extracellular region,cytokine production,defense response,response to stimulus,vesicle,membrane-bounded vesicle,response to stress,system development,multicellular organismal development,extracellular vesicular exosome,extracellular organelle,extracellular membrane-bounded organelle,inflammatory response,single-organism process,response to wounding,organ development,sing…	ocu04142,ocu00100	Lysosome,Steroid biosynthesis
ENSOCUT00000005008	ENSOCUG00000005012	SH2D1A	X:98832104-98855952	1.36254	176.455	-7.01686	5e-05	0.00164462	SH2 domain containing 1A [Source:HGNC Symbol;Acc:HGNC:10820]	GO:0002376,GO:0006955,GO:0002682,GO:0002684,GO:0006952,GO:0050896,GO:0006950,GO:0048584,GO:0050778,GO:0050776,GO:0048518,GO:0044699,GO:0044763,GO:0048522,GO:0045087,GO:0048583,GO:0005575,GO:0005515,GO:0031349,GO:0045089,GO:0051716,GO:0023056,GO:0009967,GO:0010647,GO:0045088,GO:0002252,GO:0009966,GO:0031347,GO:0023051,GO:0005488,GO:0002443,GO:0010646,GO:0080134,GO:0002699,GO:0065007,GO:0002703,GO:…	immune system process,immune response,regulation of immune system process,positive regulation of immune system process,defense response,response to stimulus,response to stress,positive regulation of response to stimulus,positive regulation of immune response,regulation of immune response,positive regulation of biological process,single-organism process,single-organism cellular process,positive re…	ocu05162,ocu04650	Measles,Natural killer cell mediated cytotoxicity
ENSOCUT00000006720	ENSOCUG00000006719	LPCAT2	5:11744939-11827826	35.0312	3.56745	3.29568	5e-05	0.00164462	lysophosphatidylcholine acyltransferase 2 [Source:HGNC Symbol;Acc:HGNC:26032]	GO:0005575,GO:0005509,GO:0005488,GO:0016020,GO:0016021,GO:0031224,GO:0044425,GO:0006066,GO:1901615,GO:0016043,GO:0046165,GO:0006629,GO:0044283,GO:0005811,GO:0008610,GO:1901617,GO:0071840,GO:0044711,GO:0043226,GO:0006793,GO:0008150,GO:0006796,GO:0043227,GO:0044255,GO:0044106,GO:0009308,GO:0005623,GO:0044464,GO:0005737,GO:0044710,GO:0009987,GO:0006576,GO:0046470,GO:0047192,GO:0042439,GO:0045017,GO:…	cellular_component,calcium ion binding,binding,membrane,integral to membrane,intrinsic to membrane,membrane part,alcohol metabolic process,organic hydroxy compound metabolic process,cellular component organization,alcohol biosynthetic process,lipid metabolic process,small molecule biosynthetic process,lipid particle,lipid biosynthetic process,organic hydroxy compound biosynthetic process,cellular…	ocu00565,ocu00564,ocu01100	Ether lipid metabolism,Glycerophospholipid metabolism,Metabolic pathways
ENSOCUT00000012313	ENSOCUG00000012310	MTA3	2:143398250-143618573	6.73567	45.2396	-2.74769	5e-05	0.00164462	metastasis associated 1 family member 3 [Source:HGNC Symbol;Acc:HGNC:23784]	GO:0048518,GO:0044699,GO:0044427,GO:0044763,GO:0048522,GO:0005694,GO:0005575,GO:0008283,GO:0005515,GO:0042127,GO:0008284,GO:0000278,GO:0005488,GO:0022402,GO:0007049,GO:0007346,GO:0043228,GO:0043232,GO:0065007,GO:0050794,GO:0000793,GO:0051726,GO:0050789,GO:1901990,GO:0003677,GO:1901987,GO:0010564,GO:0090068,GO:0044772,GO:0044770,GO:0043226,GO:0008278,GO:0008150,GO:0043227,GO:0003682,GO:0005623,GO:…	positive regulation of biological process,single-organism process,chromosomal part,single-organism cellular process,positive regulation of cellular process,chromosome,cellular_component,cell proliferation,protein binding,regulation of cell proliferation,positive regulation of cell proliferation,mitotic cell cycle,binding,cell cycle process,cell cycle,regulation of mitotic cell cycle,non-membrane-…	--	--
ENSOCUT00000001858	ENSOCUG00000001858	ICOS	7:144607940-144633962	0.810055	11.8469	-3.87035	5e-05	0.00164462	inducible T-cell costimulator [Source:HGNC Symbol;Acc:HGNC:5351]	GO:0009986,GO:0044459,GO:0009897,GO:0005575,GO:0005515,GO:0071944,GO:0005886,GO:0005488,GO:0016020,GO:0016021,GO:0031224,GO:0044425,GO:0031226,GO:0005887,GO:0005623,GO:0044464,GO:0003674	cell surface,plasma membrane part,external side of plasma membrane,cellular_component,protein binding,cell periphery,plasma membrane,binding,membrane,integral to membrane,intrinsic to membrane,membrane part,intrinsic to plasma membrane,integral to plasma membrane,cell,cell part,molecular_function	ocu05340,ocu04514,ocu04672,ocu04660	Primary immunodeficiency,Cell adhesion molecules (CAMs),Intestinal immune network for IgA production,T cell receptor signaling pathway
ENSOCUT00000001857	ENSOCUG00000001856	CTSE	16:66243433-66257825	75.2715	16.3259	2.20494	5e-05	0.00164462	cathepsin E [Source:HGNC Symbol;Acc:HGNC:2530]	GO:0002376,GO:0044421,GO:0005576,GO:0031982,GO:0031988,GO:0046983,GO:0070062,GO:0043230,GO:0065010,GO:0005575,GO:0005515,GO:0005488,GO:0019882,GO:0002504,GO:0042803,GO:0016787,GO:0004175,GO:0008233,GO:0042802,GO:0070011,GO:0043226,GO:0002495,GO:0008150,GO:0043227,GO:0048002,GO:0016485,GO:0051604,GO:0005623,GO:0044464,GO:0006508,GO:0005737,GO:0005768,GO:0019886,GO:0003674,GO:0002478,GO:0019884,GO:…	immune system process,extracellular region part,extracellular region,vesicle,membrane-bounded vesicle,protein dimerization activity,extracellular vesicular exosome,extracellular organelle,extracellular membrane-bounded organelle,cellular_component,protein binding,binding,antigen processing and presentation,antigen processing and presentation of peptide or polysaccharide antigen via MHC class II,p…	ocu04142	Lysosome
ENSOCUT00000025462	ENSOCUG00000016134	CD28	7:144364674-144391917	14.3248	73.5129	-2.35948	5e-05	0.00164462	CD28 molecule [Source:HGNC Symbol;Acc:HGNC:1653]	GO:0002376,GO:0006955,GO:0045321,GO:0001775,GO:0002682,GO:0002684,GO:0046649,GO:0002521,GO:0050865,GO:0002694,GO:0002520,GO:0001816,GO:0042110,GO:0030097,GO:0048534,GO:0009986,GO:0051249,GO:0006952,GO:0001817,GO:0051239,GO:0030098,GO:0051251,GO:0050896,GO:0002696,GO:0050867,GO:0050870,GO:0050863,GO:0006950,GO:0048584,GO:0048731,GO:0050778,GO:0044459,GO:0050776,GO:0007275,GO:0030217,GO:0006954,GO:…	immune system process,immune response,leukocyte activation,cell activation,regulation of immune system process,positive regulation of immune system process,lymphocyte activation,leukocyte differentiation,regulation of cell activation,regulation of leukocyte activation,immune system development,cytokine production,T cell activation,hemopoiesis,hematopoietic or lymphoid organ development,cell surfa…	ocu05322,ocu05323,ocu04514,ocu04672,ocu04660,ocu05330,ocu05162,ocu05320,ocu05332,ocu05416,ocu04940	Systemic lupus erythematosus,Rheumatoid arthritis,Cell adhesion molecules (CAMs),Intestinal immune network for IgA production,T cell receptor signaling pathway,Allograft rejection,Measles,Autoimmune thyroid disease,Graft-versus-host disease,Viral myocarditis,Type I diabetes mellitus
ENSOCUT00000011483	ENSOCUG00000011482	POSTN	GL018719:553829-589016	828.162	18.07	5.51824	5e-05	0.00164462	periostin [Source:HGNC Symbol;Acc:HGNC:16953]	GO:0044421,GO:0005576,GO:0050896,GO:0070887,GO:0010033,GO:0044699,GO:0048856,GO:0031012,GO:0044763,GO:0048583,GO:0032502,GO:0009605,GO:0005575,GO:0005515,GO:0042221,GO:1901700,GO:0005578,GO:0022610,GO:0051716,GO:0007155,GO:0009966,GO:0097367,GO:0023051,GO:0005488,GO:0010646,GO:1901701,GO:0005539,GO:0065007,GO:0050794,GO:0007165,GO:0050789,GO:0030198,GO:0043062,GO:0007154,GO:0044700,GO:0023052,GO:…	extracellular region part,extracellular region,response to stimulus,cellular response to chemical stimulus,response to organic substance,single-organism process,anatomical structure development,extracellular matrix,single-organism cellular process,regulation of response to stimulus,developmental process,response to external stimulus,cellular_component,protein binding,response to chemical stimulus…	--	--
ENSOCUT00000011484	ENSOCUG00000011484	TNFAIP2	GL018751:564393-573633	21.4829	5.60997	1.93713	5e-05	0.00164462	TNF alpha induced protein 2 [Source:HGNC Symbol;Acc:HGNC:11895]	GO:0044699,GO:0044763,GO:0005575,GO:0051179,GO:0032940,GO:0071944,GO:0046903,GO:0044765,GO:0051234,GO:0006810,GO:0051641,GO:0051649,GO:0008150,GO:0006887,GO:0016192,GO:0005623,GO:0044464,GO:0005737,GO:0009987,GO:0044448,GO:0044424,GO:0005938,GO:0005622,GO:0032991,GO:0000145,GO:0044444,GO:0043234	single-organism process,single-organism cellular process,cellular_component,localization,secretion by cell,cell periphery,secretion,single-organism transport,establishment of localization,transport,cellular localization,establishment of localization in cell,biological_process,exocytosis,vesicle-mediated transport,cell,cell part,cytoplasm,cellular process,cell cortex part,intracellular part,cell c…	--	--
ENSOCUT00000010352	ENSOCUG00000010337	DOCK4	7:48656777-48941271	11.9865	3.63523	1.72129	5e-05	0.00164462	dedicator of cytokinesis 4 [Source:HGNC Symbol;Acc:HGNC:19192]	GO:0050896,GO:0070887,GO:0044699,GO:0060326,GO:0044763,GO:0016477,GO:0009605,GO:0005575,GO:0005515,GO:0040011,GO:0042221,GO:0006935,GO:0042330,GO:0048870,GO:0051674,GO:0051179,GO:0006928,GO:0051716,GO:0005102,GO:0005488,GO:0016020,GO:0043228,GO:0043232,GO:0065007,GO:0050794,GO:0035556,GO:0007165,GO:0050789,GO:0007154,GO:0044700,GO:0023052,GO:0019904,GO:0043226,GO:0008150,GO:0032420,GO:0019899,GO:…	response to stimulus,cellular response to chemical stimulus,single-organism process,cell chemotaxis,single-organism cellular process,cell migration,response to external stimulus,cellular_component,protein binding,locomotion,response to chemical stimulus,chemotaxis,taxis,cell motility,localization of cell,localization,cellular component movement,cellular response to stimulus,receptor binding,bindi…	ocu04015	Rap1 signaling pathway
ENSOCUT00000002340	ENSOCUG00000002337	PRR11	19:29119098-29139026	0.748909	4.82384	-2.68732	5e-05	0.00164462	proline rich 11 [Source:HGNC Symbol;Acc:HGNC:25619]	GO:0044699,GO:0044763,GO:0005575,GO:0007049,GO:0016020,GO:0065007,GO:0050794,GO:0051726,GO:0050789,GO:0043226,GO:0008150,GO:0043227,GO:0005623,GO:0044464,GO:0005737,GO:0009987,GO:0044424,GO:0005622,GO:0043229,GO:0043231,GO:0005634	single-organism process,single-organism cellular process,cellular_component,cell cycle,membrane,biological regulation,regulation of cellular process,regulation of cell cycle,regulation of biological process,organelle,biological_process,membrane-bounded organelle,cell,cell part,cytoplasm,cellular process,intracellular part,intracellular,intracellular organelle,intracellular membrane-bounded organe…	--	--
ENSOCUT00000003765	ENSOCUG00000003768	LIF	GL018723:3396571-3404915	12.9709	1.59424	3.02434	5e-05	0.00164462	leukemia inhibitory factor (cholinergic differentiation factor) precursor [Source:RefSeq peptide;Acc:NP_001232852]	GO:0002376,GO:0006955,GO:0002682,GO:0005576,GO:0002521,GO:0002520,GO:0030097,GO:0048534,GO:0051239,GO:0050896,GO:0048584,GO:0048731,GO:0007275,GO:0048518,GO:0044699,GO:0048513,GO:0044767,GO:0048856,GO:0044763,GO:0048522,GO:0048583,GO:0032502,GO:2000026,GO:0005575,GO:0008283,GO:0005515,GO:0048519,GO:0051179,GO:1902105,GO:0030154,GO:1902107,GO:0032940,GO:0042127,GO:0044707,GO:0051704,GO:0032879,GO:…	immune system process,immune response,regulation of immune system process,extracellular region,leukocyte differentiation,immune system development,hemopoiesis,hematopoietic or lymphoid organ development,regulation of multicellular organismal process,response to stimulus,positive regulation of response to stimulus,system development,multicellular organismal development,positive regulation of biolo…	ocu04060,ocu04630,ocu04668,ocu04550	Cytokine-cytokine receptor interaction,Jak-STAT signaling pathway,TNF signaling pathway,Signaling pathways regulating pluripotency of stem cells
ENSOCUT00000029357	ENSOCUG00000000558	MYO1F	GL018767:216416-236994	56.6976	7.43887	2.93013	5e-05	0.00164462	myosin IF [Source:HGNC Symbol;Acc:HGNC:7600]	GO:0005575,GO:0005488,GO:0043228,GO:0043232,GO:0005856,GO:0044430,GO:0003774,GO:0016787,GO:0043226,GO:0043168,GO:0015629,GO:0032559,GO:0030554,GO:0005524,GO:0005623,GO:0044464,GO:0035639,GO:0032555,GO:0032550,GO:0001883,GO:0017076,GO:0032549,GO:0001882,GO:0032553,GO:0017111,GO:0043167,GO:0016462,GO:0016818,GO:0003674,GO:0016817,GO:0044424,GO:0016459,GO:0044422,GO:0044446,GO:0005622,GO:0036094,GO:…	cellular_component,binding,non-membrane-bounded organelle,intracellular non-membrane-bounded organelle,cytoskeleton,cytoskeletal part,motor activity,hydrolase activity,organelle,anion binding,actin cytoskeleton,adenyl ribonucleotide binding,adenyl nucleotide binding,ATP binding,cell,cell part,purine ribonucleoside triphosphate binding,purine ribonucleotide binding,purine ribonucleoside binding,pu…	--	--
ENSOCUT00000012265	ENSOCUG00000012267	GRAP2	GL018734:2375976-2398242	1.00268	51.6543	-5.68696	5e-05	0.00164462	GRB2-related adaptor protein 2 [Source:HGNC Symbol;Acc:HGNC:4563]	GO:0005575,GO:0005515,GO:0005488,GO:0043226,GO:0043227,GO:0005623,GO:0044464,GO:0005737,GO:0005768,GO:0003674,GO:0044424,GO:0044422,GO:0044446,GO:0005622,GO:0043229,GO:0043231,GO:0005634,GO:0044444,GO:0031981,GO:0031974,GO:0070013,GO:0043233,GO:0044428,GO:0005654	cellular_component,protein binding,binding,organelle,membrane-bounded organelle,cell,cell part,cytoplasm,endosome,molecular_function,intracellular part,organelle part,intracellular organelle part,intracellular,intracellular organelle,intracellular membrane-bounded organelle,nucleus,cytoplasmic part,nuclear lumen,membrane-enclosed lumen,intracellular organelle lumen,organelle lumen,nuclear part,nu…	ocu04660	T cell receptor signaling pathway
ENSOCUT00000023473	ENSOCUG00000025064	-	GL018747:375826-376207	38.234	225.737	-2.56171	5e-05	0.00164462	--	GO:0000786,GO:0032993,GO:0046982,GO:0046983,GO:0000785,GO:0044427,GO:0005694,GO:0005575,GO:0005515,GO:0005488,GO:0043228,GO:0043232,GO:0003677,GO:0043226,GO:0043227,GO:0005623,GO:0044464,GO:0003674,GO:0044424,GO:0044422,GO:0044446,GO:0005622,GO:0032991,GO:0043229,GO:0043231,GO:0005634,GO:1901363,GO:0097159,GO:0003676	nucleosome,protein-DNA complex,protein heterodimerization activity,protein dimerization activity,chromatin,chromosomal part,chromosome,cellular_component,protein binding,binding,non-membrane-bounded organelle,intracellular non-membrane-bounded organelle,DNA binding,organelle,membrane-bounded organelle,cell,cell part,molecular_function,intracellular part,organelle part,intracellular organelle part…	ocu05322,ocu05034,ocu05203	Systemic lupus erythematosus,Alcoholism,Viral carcinogenesis
ENSOCUT00000025950	ENSOCUG00000024086	-	12:10849809-10850202	123.609	706.446	-2.5148	5e-05	0.00164462	histone cluster 1, H2ab [Source:HGNC Symbol;Acc:HGNC:4734]	GO:0000786,GO:0032993,GO:0044421,GO:0005576,GO:0046982,GO:0031982,GO:0031988,GO:0046983,GO:0070062,GO:0043230,GO:0065010,GO:0044699,GO:0000785,GO:0044427,GO:0005694,GO:0005575,GO:0008283,GO:0005515,GO:0048519,GO:0042127,GO:0048523,GO:0005488,GO:0043228,GO:0043232,GO:0065007,GO:0050794,GO:0050789,GO:0003677,GO:0008285,GO:0043226,GO:0008150,GO:0043227,GO:0005623,GO:0044464,GO:0009987,GO:0003674,GO:…	nucleosome,protein-DNA complex,extracellular region part,extracellular region,protein heterodimerization activity,vesicle,membrane-bounded vesicle,protein dimerization activity,extracellular vesicular exosome,extracellular organelle,extracellular membrane-bounded organelle,single-organism process,chromatin,chromosomal part,chromosome,cellular_component,cell proliferation,protein binding,negative …	ocu05322,ocu05034	Systemic lupus erythematosus,Alcoholism
ENSOCUT00000027882	ENSOCUG00000022850	-	1:144186488-144194006	33.4705	8.66306	1.94994	5e-05	0.00164462	folate receptor beta [Source:HGNC Symbol;Acc:HGNC:3793]	GO:0009986,GO:0044459,GO:0048518,GO:0044699,GO:0009897,GO:0048522,GO:0005575,GO:0008283,GO:0051179,GO:0042127,GO:0071944,GO:0005886,GO:0008284,GO:0005488,GO:0016020,GO:0065007,GO:0016021,GO:0044765,GO:0031224,GO:0050794,GO:0050789,GO:0044425,GO:0051234,GO:0006810,GO:0015711,GO:0071702,GO:0006820,GO:0015849,GO:0046942,GO:0031226,GO:0008150,GO:0043168,GO:0008144,GO:0006811,GO:0008517,GO:0015884,GO:…	cell surface,plasma membrane part,positive regulation of biological process,single-organism process,external side of plasma membrane,positive regulation of cellular process,cellular_component,cell proliferation,localization,regulation of cell proliferation,cell periphery,plasma membrane,positive regulation of cell proliferation,binding,membrane,biological regulation,integral to membrane,single-or…	ocu04144	Endocytosis
ENSOCUT00000006945	ENSOCUG00000006945	KRT8	4:36813383-36820065	2.25912	38.74	-4.09999	5e-05	0.00164462	keratin 8 [Source:HGNC Symbol;Acc:HGNC:6446]	GO:0044421,GO:0005576,GO:0050896,GO:0070887,GO:0010033,GO:0031982,GO:0031988,GO:0048731,GO:0007275,GO:0070062,GO:0043230,GO:0065010,GO:0044699,GO:0048513,GO:0051707,GO:0044767,GO:0034097,GO:0048856,GO:0009607,GO:0044763,GO:0032502,GO:0005575,GO:0005515,GO:0042221,GO:0071310,GO:0071345,GO:0030154,GO:0044707,GO:0051704,GO:0071944,GO:0032501,GO:0051716,GO:0005886,GO:0048869,GO:0006915,GO:0012501,GO:…	extracellular region part,extracellular region,response to stimulus,cellular response to chemical stimulus,response to organic substance,vesicle,membrane-bounded vesicle,system development,multicellular organismal development,extracellular vesicular exosome,extracellular organelle,extracellular membrane-bounded organelle,single-organism process,organ development,response to other organism,single-…	--	--
ENSOCUT00000017942	ENSOCUG00000024883	-	15:76134213-76135954	278.287	62.0584	2.16488	5e-05	0.00164462	--	GO:0002376,GO:0006955,GO:0044421,GO:0005576,GO:0050896,GO:0070887,GO:0044699,GO:0005615,GO:0060326,GO:0044763,GO:0016477,GO:0009605,GO:0005575,GO:0005515,GO:0040011,GO:0042221,GO:0006935,GO:0042330,GO:0048870,GO:0051674,GO:0051179,GO:0006928,GO:0051716,GO:0005102,GO:0005488,GO:0005125,GO:0008009,GO:0042379,GO:0005126,GO:0001664,GO:0008150,GO:0009987,GO:0003674	immune system process,immune response,extracellular region part,extracellular region,response to stimulus,cellular response to chemical stimulus,single-organism process,extracellular space,cell chemotaxis,single-organism cellular process,cell migration,response to external stimulus,cellular_component,protein binding,locomotion,response to chemical stimulus,chemotaxis,taxis,cell motility,localizat…	ocu05134,ocu04062,ocu05132,ocu04668	Legionellosis,Chemokine signaling pathway,Salmonella infection,TNF signaling pathway
ENSOCUT00000014764	ENSOCUG00000014767	PAG1	3:96655556-96668735	4.98454	28.7939	-2.53023	5e-05	0.00164462	phosphoprotein membrane anchor with glycosphingolipid microdomains 1 [Source:HGNC Symbol;Acc:HGNC:30043]	GO:0002376,GO:0045321,GO:0001775,GO:0002682,GO:0046649,GO:0050865,GO:0002694,GO:0042110,GO:0051249,GO:0050896,GO:0050863,GO:0044699,GO:0044763,GO:0005575,GO:0005515,GO:0048519,GO:0048523,GO:0071944,GO:0051716,GO:0005886,GO:0050866,GO:0002683,GO:0002695,GO:0005488,GO:0016020,GO:0065007,GO:0016021,GO:0031224,GO:0050794,GO:0045121,GO:0035556,GO:0007165,GO:0050789,GO:0044425,GO:0051250,GO:0007154,GO:…	immune system process,leukocyte activation,cell activation,regulation of immune system process,lymphocyte activation,regulation of cell activation,regulation of leukocyte activation,T cell activation,regulation of lymphocyte activation,response to stimulus,regulation of T cell activation,single-organism process,single-organism cellular process,cellular_component,protein binding,negative regulatio…	--	--
ENSOCUT00000022665	ENSOCUG00000026966	SASH3	X:104213657-104227972	13.8784	120.983	-3.12389	5e-05	0.00164462	SAM and SH3 domain containing 3 [Source:HGNC Symbol;Acc:HGNC:15975]	GO:0002376,GO:0006955,GO:0045321,GO:0001775,GO:0002682,GO:0002684,GO:0046649,GO:0002521,GO:0050865,GO:0002694,GO:0002520,GO:0001816,GO:0042110,GO:0030097,GO:0048534,GO:0051249,GO:0001817,GO:0051239,GO:0030098,GO:0051251,GO:0050896,GO:0002696,GO:0050867,GO:0050870,GO:0050863,GO:0048584,GO:0048731,GO:0050778,GO:0050776,GO:0007275,GO:0030217,GO:0048518,GO:0044699,GO:0046651,GO:0032943,GO:0070661,GO:…	immune system process,immune response,leukocyte activation,cell activation,regulation of immune system process,positive regulation of immune system process,lymphocyte activation,leukocyte differentiation,regulation of cell activation,regulation of leukocyte activation,immune system development,cytokine production,T cell activation,hemopoiesis,hematopoietic or lymphoid organ development,regulation…	--	--
ENSOCUT00000005125	ENSOCUG00000005126	RHOH	2:29498138-29498714	2.8713	53.9524	-4.23191	5e-05	0.00164462	ras homolog family member H [Source:HGNC Symbol;Acc:HGNC:686]	GO:0002376,GO:0045321,GO:0001775,GO:0046649,GO:0002521,GO:0002520,GO:0042110,GO:0030097,GO:0048534,GO:0030098,GO:0050896,GO:0048731,GO:0044459,GO:0007275,GO:0030217,GO:0044699,GO:0048513,GO:0044767,GO:0048856,GO:0044763,GO:0048583,GO:0032502,GO:0005575,GO:0005515,GO:0048519,GO:0030154,GO:0044707,GO:0048523,GO:0071944,GO:0032501,GO:0051716,GO:0007243,GO:0005886,GO:0048869,GO:0009966,GO:0010627,GO:…	immune system process,leukocyte activation,cell activation,lymphocyte activation,leukocyte differentiation,immune system development,T cell activation,hemopoiesis,hematopoietic or lymphoid organ development,lymphocyte differentiation,response to stimulus,system development,plasma membrane part,multicellular organismal development,T cell differentiation,single-organism process,organ development,si…	ocu04670	Leukocyte transendothelial migration
ENSOCUT00000004021	ENSOCUG00000004022	-	GL019748:3710-12273	26.0325	2.95992	3.13668	5e-05	0.00164462	--	--	--	--	--
ENSOCUT00000030995	ENSOCUG00000003186	HPRT	X:108767870-108815679	13.9513	4.38843	1.66863	5e-05	0.00164462	hypoxanthine phosphoribosyltransferase 1 [Source:HGNC Symbol;Acc:HGNC:5157]	GO:0002376,GO:0045321,GO:0001775,GO:0044421,GO:0005576,GO:0046649,GO:0050896,GO:0010033,GO:0031982,GO:0031988,GO:0048731,GO:0007275,GO:0046983,GO:0070062,GO:0043230,GO:0065010,GO:0048518,GO:0044699,GO:0046651,GO:0032943,GO:0070661,GO:0048513,GO:0044767,GO:0048856,GO:0044763,GO:0048522,GO:0032502,GO:0005575,GO:0008283,GO:0005515,GO:0042221,GO:0030154,GO:0044707,GO:0032501,GO:0048869,GO:0008219,GO:…	immune system process,leukocyte activation,cell activation,extracellular region part,extracellular region,lymphocyte activation,response to stimulus,response to organic substance,vesicle,membrane-bounded vesicle,system development,multicellular organismal development,protein dimerization activity,extracellular vesicular exosome,extracellular organelle,extracellular membrane-bounded organelle,posi…	ocu00983,ocu00230,ocu01100	Drug metabolism - other enzymes,Purine metabolism,Metabolic pathways
ENSOCUT00000030668	ENSOCUG00000027400	PLAUR	GL018881:85741-98957	38.4756	5.48857	2.80944	5e-05	0.00164462	plasminogen activator, urokinase receptor [Source:HGNC Symbol;Acc:HGNC:9053]	GO:0044421,GO:0005576,GO:0050896,GO:0031982,GO:0031988,GO:0048584,GO:0044459,GO:0070062,GO:0043230,GO:0065010,GO:0048518,GO:0044699,GO:0044763,GO:0048522,GO:0048583,GO:0005575,GO:0005515,GO:0048519,GO:0048523,GO:0071944,GO:0051716,GO:0023056,GO:0009967,GO:0010647,GO:0005886,GO:0043067,GO:0042981,GO:0006915,GO:0009966,GO:0012501,GO:0043066,GO:0008219,GO:0016265,GO:0043069,GO:0010941,GO:0006468,GO:…	extracellular region part,extracellular region,response to stimulus,vesicle,membrane-bounded vesicle,positive regulation of response to stimulus,plasma membrane part,extracellular vesicular exosome,extracellular organelle,extracellular membrane-bounded organelle,positive regulation of biological process,single-organism process,single-organism cellular process,positive regulation of cellular proce…	ocu04610,ocu05205	Complement and coagulation cascades,Proteoglycans in cancer
ENSOCUT00000008473	ENSOCUG00000008464	PRKG2	15:69077234-69185870	0.184123	1.98494	-3.43035	0.0001	0.0029475	protein kinase, cGMP-dependent, type II [Source:HGNC Symbol;Acc:HGNC:9416]	GO:0006468,GO:0005488,GO:0016310,GO:0006793,GO:0008150,GO:0043168,GO:0006796,GO:0032559,GO:0030554,GO:0005524,GO:0004690,GO:0035639,GO:0032555,GO:0032550,GO:0001883,GO:0017076,GO:0032549,GO:0001882,GO:0032553,GO:0009987,GO:0004672,GO:0016773,GO:0006464,GO:0036211,GO:0016301,GO:0043167,GO:0043412,GO:0003674,GO:0004692,GO:0016772,GO:0019538,GO:0030551,GO:0036094,GO:0004674,GO:0003824,GO:0030553,GO:…	protein phosphorylation,binding,phosphorylation,phosphorus metabolic process,biological_process,anion binding,phosphate-containing compound metabolic process,adenyl ribonucleotide binding,adenyl nucleotide binding,ATP binding,cyclic nucleotide-dependent protein kinase activity,purine ribonucleoside triphosphate binding,purine ribonucleotide binding,purine ribonucleoside binding,purine nucleoside …	ocu04730,ocu04540,ocu04611,ocu04970,ocu04713,ocu04022,ocu04740	Long-term depression,Gap junction,Platelet activation,Salivary secretion,Circadian entrainment,cGMP-PKG signaling pathway,Olfactory transduction
ENSOCUT00000014802	ENSOCUG00000014794	ATP2A3	19:14576466-14607282	10.2745	36.8361	-1.84205	0.0001	0.0029475	ATPase sarcoplasmic/endoplasmic reticulum Ca2+ transporting 3 [Source:HGNC Symbol;Acc:HGNC:813]	GO:0044699,GO:0044763,GO:0005575,GO:0005515,GO:0051179,GO:0005488,GO:0016020,GO:0016021,GO:0044765,GO:0031224,GO:0044425,GO:0051234,GO:0006810,GO:0016787,GO:0043226,GO:0008150,GO:0043168,GO:0043227,GO:0032559,GO:0030554,GO:0005524,GO:0006811,GO:0043492,GO:0005623,GO:0044464,GO:0035639,GO:0032555,GO:0005737,GO:0032550,GO:0001883,GO:0017076,GO:0032549,GO:0001882,GO:0032553,GO:0009987,GO:0022804,GO:…	single-organism process,single-organism cellular process,cellular_component,protein binding,localization,binding,membrane,integral to membrane,single-organism transport,intrinsic to membrane,membrane part,establishment of localization,transport,hydrolase activity,organelle,biological_process,anion binding,membrane-bounded organelle,adenyl ribonucleotide binding,adenyl nucleotide binding,ATP bindi…	ocu04020,ocu04022,ocu04972,ocu05010	Calcium signaling pathway,cGMP-PKG signaling pathway,Pancreatic secretion,Alzheimer's disease
ENSOCUT00000031968	ENSOCUG00000021336	TRAV5	17:42101153-42101656	0	14.3027	#NAME?	0.0001	0.0029475	T cell receptor alpha variable 5 [Source:HGNC Symbol;Acc:HGNC:12143]	--	--	--	--
ENSOCUT00000010110	ENSOCUG00000010111	P4HA3	1:142289493-142320062	6.29482	0.775273	3.02139	0.0001	0.0029475	prolyl 4-hydroxylase subunit alpha 3 [Source:HGNC Symbol;Acc:HGNC:30135]	GO:0005575,GO:0005515,GO:0005488,GO:0030246,GO:0018193,GO:0043226,GO:0008150,GO:0043168,GO:0043227,GO:0005623,GO:0044464,GO:0005737,GO:0048029,GO:0044710,GO:0009987,GO:0031406,GO:0019842,GO:0006464,GO:0036211,GO:0031418,GO:0019511,GO:0043167,GO:0043412,GO:0003674,GO:0044424,GO:0004656,GO:0016702,GO:0016701,GO:0019538,GO:0019798,GO:0031545,GO:0005622,GO:0036094,GO:0005783,GO:0043229,GO:0031543,GO:…	cellular_component,protein binding,binding,carbohydrate binding,peptidyl-amino acid modification,organelle,biological_process,anion binding,membrane-bounded organelle,cell,cell part,cytoplasm,monosaccharide binding,single-organism metabolic process,cellular process,carboxylic acid binding,vitamin binding,cellular protein modification process,protein modification process,L-ascorbic acid binding,pe…	ocu00330,ocu01100	Arginine and proline metabolism,Metabolic pathways
ENSOCUT00000027100	ENSOCUG00000025780	CCL25	GL018767:567265-592935	0.52323	35.997	-6.10429	0.0001	0.0029475	C-C motif chemokine ligand 25 [Source:HGNC Symbol;Acc:HGNC:10624]	GO:0002376,GO:0006955,GO:0005576,GO:0050896,GO:0070887,GO:0048518,GO:0044699,GO:0060326,GO:0044763,GO:0016477,GO:0048522,GO:0009605,GO:0005575,GO:0005515,GO:0040011,GO:0042221,GO:0006935,GO:0042330,GO:0048870,GO:0051674,GO:0051179,GO:0006928,GO:0022610,GO:0051716,GO:0007155,GO:0005102,GO:0005488,GO:0005125,GO:0065007,GO:0008009,GO:0030155,GO:0050794,GO:0042379,GO:0007165,GO:0050789,GO:0007154,GO:…	immune system process,immune response,extracellular region,response to stimulus,cellular response to chemical stimulus,positive regulation of biological process,single-organism process,cell chemotaxis,single-organism cellular process,cell migration,positive regulation of cellular process,response to external stimulus,cellular_component,protein binding,locomotion,response to chemical stimulus,chem…	ocu04060,ocu04672,ocu04062	Cytokine-cytokine receptor interaction,Intestinal immune network for IgA production,Chemokine signaling pathway
ENSOCUT00000011778	ENSOCUG00000029244	KRT14	19:42551548-42555707	0.351931	8.28265	-4.55673	0.0001	0.0029475	keratin 14 [Source:HGNC Symbol;Acc:HGNC:6416]	GO:0044421,GO:0005576,GO:0031982,GO:0031988,GO:0070062,GO:0043230,GO:0065010,GO:0044699,GO:0044767,GO:0048856,GO:0044763,GO:0032502,GO:0005575,GO:0005515,GO:0030154,GO:0044707,GO:0071944,GO:0032501,GO:0048869,GO:0005488,GO:0043228,GO:0043232,GO:0005856,GO:0044430,GO:0009888,GO:0016043,GO:0045109,GO:0071840,GO:0043226,GO:0060429,GO:0008150,GO:0043227,GO:0007010,GO:0005882,GO:0005623,GO:0045104,GO:…	extracellular region part,extracellular region,vesicle,membrane-bounded vesicle,extracellular vesicular exosome,extracellular organelle,extracellular membrane-bounded organelle,single-organism process,single-organism developmental process,anatomical structure development,single-organism cellular process,developmental process,cellular_component,protein binding,cell differentiation,single-multicell…	--	--
ENSOCUT00000016710	ENSOCUG00000016706	KIF11	18:40400751-40462364	6.19926	43.5766	-2.81339	0.0001	0.0029475	kinesin family member 11 [Source:HGNC Symbol;Acc:HGNC:6388]	GO:0044699,GO:0044763,GO:0005575,GO:0005515,GO:0006928,GO:0000278,GO:0005488,GO:0022402,GO:0007049,GO:0016020,GO:0000280,GO:0007067,GO:0007346,GO:0043228,GO:0043232,GO:0065007,GO:0050794,GO:0005856,GO:0051726,GO:0050789,GO:0044430,GO:0048285,GO:0003774,GO:0010564,GO:0019900,GO:0003777,GO:0007088,GO:0051783,GO:0019901,GO:0007051,GO:0016787,GO:0005819,GO:0016043,GO:0000226,GO:0071840,GO:0007052,GO:…	single-organism process,single-organism cellular process,cellular_component,protein binding,cellular component movement,mitotic cell cycle,binding,cell cycle process,cell cycle,membrane,nuclear division,mitosis,regulation of mitotic cell cycle,non-membrane-bounded organelle,intracellular non-membrane-bounded organelle,biological regulation,regulation of cellular process,cytoskeleton,regulation of…	--	--
ENSOCUT00000004946	ENSOCUG00000004936	NAV3	4:57006202-57429831	12.1531	3.44572	1.81845	0.0001	0.0029475	neuron navigator 3 [Source:HGNC Symbol;Acc:HGNC:15998]	GO:0005488,GO:0043168,GO:0032559,GO:0030554,GO:0005524,GO:0035639,GO:0032555,GO:0032550,GO:0001883,GO:0017076,GO:0032549,GO:0001882,GO:0032553,GO:0043167,GO:0003674,GO:0036094,GO:0000166,GO:1901265,GO:1901363,GO:0097159	binding,anion binding,adenyl ribonucleotide binding,adenyl nucleotide binding,ATP binding,purine ribonucleoside triphosphate binding,purine ribonucleotide binding,purine ribonucleoside binding,purine nucleoside binding,purine nucleotide binding,ribonucleoside binding,nucleoside binding,ribonucleotide binding,ion binding,molecular_function,small molecule binding,nucleotide binding,nucleoside phosp…	--	--
ENSOCUT00000026179	ENSOCUG00000008500	GRIA2	15:6575418-6738378	0.220858	113.733	-9.00832	0.0001	0.0029475	glutamate ionotropic receptor AMPA type subunit 2 [Source:HGNC Symbol;Acc:HGNC:4572]	GO:0050896,GO:0044699,GO:0044763,GO:0005575,GO:0005515,GO:0051179,GO:0071944,GO:0051716,GO:0005886,GO:0005488,GO:0016020,GO:0065007,GO:0016021,GO:0044765,GO:0031224,GO:0050794,GO:0007165,GO:0050789,GO:0044425,GO:0051234,GO:0006810,GO:0007154,GO:0044700,GO:0023052,GO:0030054,GO:0007166,GO:0008150,GO:0006811,GO:0005623,GO:0044464,GO:0009987,GO:0005215,GO:0003674,GO:0044456,GO:0005231,GO:0004872,GO:…	response to stimulus,single-organism process,single-organism cellular process,cellular_component,protein binding,localization,cell periphery,cellular response to stimulus,plasma membrane,binding,membrane,biological regulation,integral to membrane,single-organism transport,intrinsic to membrane,regulation of cellular process,signal transduction,regulation of biological process,membrane part,establ…	ocu05031,ocu04730,ocu04713,ocu04720,ocu05030,ocu05014,ocu04024,ocu04728,ocu04080,ocu04723,ocu05033,ocu04724	Amphetamine addiction,Long-term depression,Circadian entrainment,Long-term potentiation,Cocaine addiction,Amyotrophic lateral sclerosis (ALS),cAMP signaling pathway,Dopaminergic synapse,Neuroactive ligand-receptor interaction,Retrograde endocannabinoid signaling,Nicotine addiction,Glutamatergic synapse
ENSOCUT00000015765	ENSOCUG00000015756	CASC5	17:31375804-31453375	3.75683	20.5399	-2.45084	0.0001	0.0029475	cancer susceptibility candidate 5 [Source:HGNC Symbol;Acc:HGNC:24054]	GO:0044421,GO:0005576,GO:0031982,GO:0031988,GO:0070062,GO:0043230,GO:0065010,GO:0044699,GO:0044763,GO:0005575,GO:0005515,GO:0048519,GO:0051179,GO:0048523,GO:0007059,GO:0005488,GO:0022402,GO:0007049,GO:0065007,GO:0050794,GO:0051726,GO:0050789,GO:0065009,GO:0010948,GO:1901988,GO:1901987,GO:0010564,GO:0031410,GO:0016023,GO:0071173,GO:0031577,GO:0044770,GO:0033036,GO:0008608,GO:0000075,GO:0051641,GO:…	extracellular region part,extracellular region,vesicle,membrane-bounded vesicle,extracellular vesicular exosome,extracellular organelle,extracellular membrane-bounded organelle,single-organism process,single-organism cellular process,cellular_component,protein binding,negative regulation of biological process,localization,negative regulation of cellular process,chromosome segregation,binding,cell…	--	--
ENSOCUT00000003450	ENSOCUG00000003452	PPM1K	15:61770523-61786327	28.9511	93.0248	-1.684	0.0001	0.0029475	protein phosphatase, Mg2+/Mn2+ dependent 1K [Source:HGNC Symbol;Acc:HGNC:25415]	GO:0005575,GO:0005515,GO:0005488,GO:0016787,GO:0043226,GO:0006793,GO:0008150,GO:0006796,GO:0043227,GO:0005623,GO:0044464,GO:0005737,GO:0009987,GO:0006464,GO:0036211,GO:0043167,GO:0043412,GO:0003674,GO:0044424,GO:0019538,GO:0005622,GO:0043229,GO:0046872,GO:0003824,GO:0004722,GO:0043169,GO:0043231,GO:0016788,GO:0044444,GO:0044267,GO:0042578,GO:0044238,GO:0071704,GO:0006470,GO:0043170,GO:0004721,GO:…	cellular_component,protein binding,binding,hydrolase activity,organelle,phosphorus metabolic process,biological_process,phosphate-containing compound metabolic process,membrane-bounded organelle,cell,cell part,cytoplasm,cellular process,cellular protein modification process,protein modification process,ion binding,macromolecule modification,molecular_function,intracellular part,protein metabolic …	--	--
[truncated: 663 more rows]
