# Supplementary material for: Functional lncRNA-miRNA-mRNA networks in rabbit carotid atherosclerosis
Source: Aging (Albany NY). 2020 Feb 11;12(3):2798–813. doi: 10.18632/aging.102778 (PMC7041763; doi:10.18632/aging.102778)
Supplement: Supplementary Table 4 [file aging-12-102778-s007..xlsx]

## Sheet: 工作表1
Supplementary Table 4. LncRNA-miRNA and miRNA-mRNA interaction pairs.
miRNA id	lncRNA id	cor(miRNAvslncRNA)	pval	mRNA id	cor(miRNAvsmRNA)	pval
ocu-miR-3059-5p	XLOC_060135	-0.834366	0.03888	ENSOCUG00000003303	-0.998368	3.99e-06
ocu-miR-452-5p	XLOC_006635	-0.947799	0.00401627	ENSOCUG00000010384	-0.997566	8.88e-06
ocu-miR-452-5p	XLOC_009780	-0.93166	0.00684589	ENSOCUG00000010384	-0.997566	8.88e-06
ocu-miR-452-5p	XLOC_021856	-0.929046	0.00737304	ENSOCUG00000010384	-0.997566	8.88e-06
ocu-miR-452-5p	XLOC_043244	-0.92865	0.0074547	ENSOCUG00000010384	-0.997566	8.88e-06
ocu-miR-452-5p	XLOC_073374	-0.921147	0.00908164	ENSOCUG00000010384	-0.997566	8.88e-06
ocu-miR-452-5p	XLOC_051904	-0.916691	0.0101215	ENSOCUG00000010384	-0.997566	8.88e-06
ocu-miR-452-5p	XLOC_065311	-0.916623	0.0101377	ENSOCUG00000010384	-0.997566	8.88e-06
ocu-miR-452-5p	XLOC_001389	-0.915868	0.0103194	ENSOCUG00000010384	-0.997566	8.88e-06
ocu-miR-452-5p	XLOC_071014	-0.914692	0.0106058	ENSOCUG00000010384	-0.997566	8.88e-06
ocu-miR-452-5p	XLOC_037129	-0.913867	0.0108088	ENSOCUG00000010384	-0.997566	8.88e-06
ocu-miR-452-5p	XLOC_021929	-0.912998	0.0110247	ENSOCUG00000010384	-0.997566	8.88e-06
ocu-miR-452-5p	XLOC_040461	-0.910543	0.0116459	ENSOCUG00000010384	-0.997566	8.88e-06
ocu-miR-452-5p	XLOC_027971	-0.910418	0.011678	ENSOCUG00000010384	-0.997566	8.88e-06
ocu-miR-452-5p	XLOC_011506	-0.910399	0.0116829	ENSOCUG00000010384	-0.997566	8.88e-06
ocu-miR-452-5p	XLOC_073996	-0.910149	0.011747	ENSOCUG00000010384	-0.997566	8.88e-06
ocu-miR-452-5p	XLOC_062964	-0.90958	0.011894	ENSOCUG00000010384	-0.997566	8.88e-06
ocu-miR-452-5p	XLOC_049214	-0.90804	0.0122962	ENSOCUG00000010384	-0.997566	8.88e-06
ocu-miR-452-5p	XLOC_010558	-0.907689	0.0123886	ENSOCUG00000010384	-0.997566	8.88e-06
ocu-miR-452-5p	XLOC_064790	-0.907349	0.0124785	ENSOCUG00000010384	-0.997566	8.88e-06
ocu-miR-452-5p	XLOC_004699	-0.906619	0.012673	ENSOCUG00000010384	-0.997566	8.88e-06
ocu-miR-452-5p	XLOC_007967	-0.906544	0.012693	ENSOCUG00000010384	-0.997566	8.88e-06
ocu-miR-452-5p	XLOC_039148	-0.905971	0.0128464	ENSOCUG00000010384	-0.997566	8.88e-06
ocu-miR-452-5p	XLOC_073374	-0.904927	0.0131286	ENSOCUG00000010384	-0.997566	8.88e-06
ocu-miR-452-5p	XLOC_015763	-0.904368	0.0132808	ENSOCUG00000010384	-0.997566	8.88e-06
ocu-miR-452-5p	XLOC_038015	-0.904293	0.0133013	ENSOCUG00000010384	-0.997566	8.88e-06
ocu-miR-452-5p	XLOC_022075	-0.904151	0.0133403	ENSOCUG00000010384	-0.997566	8.88e-06
ocu-miR-452-5p	XLOC_005676	-0.903235	0.0135921	ENSOCUG00000010384	-0.997566	8.88e-06
ocu-miR-452-5p	XLOC_049412	-0.902696	0.0137413	ENSOCUG00000010384	-0.997566	8.88e-06
ocu-miR-452-5p	XLOC_000601	-0.900332	0.0144056	ENSOCUG00000010384	-0.997566	8.88e-06
ocu-miR-452-5p	XLOC_047731	-0.897755	0.0151467	ENSOCUG00000010384	-0.997566	8.88e-06
ocu-miR-452-5p	XLOC_045381	-0.896875	0.0154037	ENSOCUG00000010384	-0.997566	8.88e-06
ocu-miR-452-5p	XLOC_019660	-0.89686	0.0154083	ENSOCUG00000010384	-0.997566	8.88e-06
ocu-miR-452-5p	XLOC_025091	-0.895594	0.0157818	ENSOCUG00000010384	-0.997566	8.88e-06
ocu-miR-452-5p	XLOC_035367	-0.895567	0.0157898	ENSOCUG00000010384	-0.997566	8.88e-06
ocu-miR-452-5p	XLOC_009976	-0.895376	0.0158467	ENSOCUG00000010384	-0.997566	8.88e-06
ocu-miR-452-5p	XLOC_024947	-0.895201	0.0158988	ENSOCUG00000010384	-0.997566	8.88e-06
ocu-miR-452-5p	XLOC_012165	-0.894303	0.0161675	ENSOCUG00000010384	-0.997566	8.88e-06
ocu-miR-452-5p	XLOC_052220	-0.890435	0.0173492	ENSOCUG00000010384	-0.997566	8.88e-06
ocu-miR-452-5p	XLOC_044422	-0.8855	0.0189148	ENSOCUG00000010384	-0.997566	8.88e-06
ocu-miR-452-5p	XLOC_053607	-0.885319	0.0189734	ENSOCUG00000010384	-0.997566	8.88e-06
ocu-miR-452-5p	XLOC_038877	-0.885105	0.0190428	ENSOCUG00000010384	-0.997566	8.88e-06
ocu-miR-452-5p	XLOC_061012	-0.883226	0.0196582	ENSOCUG00000010384	-0.997566	8.88e-06
ocu-miR-452-5p	XLOC_057299	-0.88268	0.0198385	ENSOCUG00000010384	-0.997566	8.88e-06
ocu-miR-452-5p	XLOC_069541	-0.882263	0.0199771	ENSOCUG00000010384	-0.997566	8.88e-06
ocu-miR-452-5p	XLOC_047597	-0.880409	0.0205978	ENSOCUG00000010384	-0.997566	8.88e-06
ocu-miR-452-5p	XLOC_072493	-0.87963	0.0208615	ENSOCUG00000010384	-0.997566	8.88e-06
ocu-miR-452-5p	XLOC_048617	-0.878241	0.0213352	ENSOCUG00000010384	-0.997566	8.88e-06
ocu-miR-452-5p	XLOC_009780	-0.876846	0.0218164	ENSOCUG00000010384	-0.997566	8.88e-06
ocu-miR-452-5p	XLOC_062791	-0.876297	0.0220071	ENSOCUG00000010384	-0.997566	8.88e-06
ocu-miR-452-5p	XLOC_041177	-0.874393	0.0226749	ENSOCUG00000010384	-0.997566	8.88e-06
ocu-miR-452-5p	XLOC_010536	-0.873139	0.0231199	ENSOCUG00000010384	-0.997566	8.88e-06
ocu-miR-452-5p	XLOC_001579	-0.872471	0.0233584	ENSOCUG00000010384	-0.997566	8.88e-06
ocu-miR-452-5p	XLOC_058059	-0.872187	0.0234602	ENSOCUG00000010384	-0.997566	8.88e-06
ocu-miR-452-5p	XLOC_006697	-0.871147	0.0238348	ENSOCUG00000010384	-0.997566	8.88e-06
ocu-miR-452-5p	XLOC_010604	-0.870811	0.0239565	ENSOCUG00000010384	-0.997566	8.88e-06
ocu-miR-452-5p	XLOC_076929	-0.870639	0.0240192	ENSOCUG00000010384	-0.997566	8.88e-06
ocu-miR-452-5p	XLOC_048618	-0.870484	0.0240752	ENSOCUG00000010384	-0.997566	8.88e-06
ocu-miR-452-5p	XLOC_071141	-0.869801	0.024324	ENSOCUG00000010384	-0.997566	8.88e-06
ocu-miR-452-5p	XLOC_011751	-0.868799	0.0246914	ENSOCUG00000010384	-0.997566	8.88e-06
ocu-miR-452-5p	XLOC_008325	-0.86796	0.0250008	ENSOCUG00000010384	-0.997566	8.88e-06
ocu-miR-452-5p	XLOC_001389	-0.867498	0.0251719	ENSOCUG00000010384	-0.997566	8.88e-06
ocu-miR-452-5p	XLOC_003345	-0.865234	0.0260189	ENSOCUG00000010384	-0.997566	8.88e-06
ocu-miR-452-5p	XLOC_071014	-0.863461	0.0266917	ENSOCUG00000010384	-0.997566	8.88e-06
ocu-miR-452-5p	XLOC_037129	-0.863452	0.026695	ENSOCUG00000010384	-0.997566	8.88e-06
ocu-miR-452-5p	XLOC_061007	-0.863263	0.0267671	ENSOCUG00000010384	-0.997566	8.88e-06
ocu-miR-452-5p	XLOC_031578	-0.863165	0.0268047	ENSOCUG00000010384	-0.997566	8.88e-06
ocu-miR-452-5p	XLOC_034393	-0.863165	0.0268047	ENSOCUG00000010384	-0.997566	8.88e-06
ocu-miR-452-5p	XLOC_065151	-0.863165	0.0268047	ENSOCUG00000010384	-0.997566	8.88e-06
ocu-miR-452-5p	XLOC_027227	-0.862928	0.0268955	ENSOCUG00000010384	-0.997566	8.88e-06
ocu-miR-452-5p	XLOC_010604	-0.861232	0.0275489	ENSOCUG00000010384	-0.997566	8.88e-06
ocu-miR-452-5p	XLOC_061007	-0.860997	0.0276397	ENSOCUG00000010384	-0.997566	8.88e-06
ocu-miR-452-5p	XLOC_024044	-0.859713	0.0281402	ENSOCUG00000010384	-0.997566	8.88e-06
ocu-miR-452-5p	XLOC_062997	-0.859205	0.0283394	ENSOCUG00000010384	-0.997566	8.88e-06
ocu-miR-452-5p	XLOC_024482	-0.858765	0.0285124	ENSOCUG00000010384	-0.997566	8.88e-06
ocu-miR-452-5p	XLOC_028525	-0.858541	0.0286005	ENSOCUG00000010384	-0.997566	8.88e-06
ocu-miR-452-5p	XLOC_035834	-0.85767	0.0289451	ENSOCUG00000010384	-0.997566	8.88e-06
ocu-miR-452-5p	XLOC_044422	-0.855145	0.0299548	ENSOCUG00000010384	-0.997566	8.88e-06
ocu-miR-452-5p	XLOC_008852	-0.855039	0.0299975	ENSOCUG00000010384	-0.997566	8.88e-06
ocu-miR-452-5p	XLOC_034890	-0.854403	0.0302544	ENSOCUG00000010384	-0.997566	8.88e-06
ocu-miR-452-5p	XLOC_056275	-0.853603	0.0305795	ENSOCUG00000010384	-0.997566	8.88e-06
ocu-miR-452-5p	XLOC_063949	-0.853113	0.0307791	ENSOCUG00000010384	-0.997566	8.88e-06
ocu-miR-452-5p	XLOC_073215	-0.852249	0.0311328	ENSOCUG00000010384	-0.997566	8.88e-06
ocu-miR-452-5p	XLOC_039641	-0.848936	0.0325068	ENSOCUG00000010384	-0.997566	8.88e-06
ocu-miR-452-5p	XLOC_020914	-0.848268	0.0327872	ENSOCUG00000010384	-0.997566	8.88e-06
ocu-miR-452-5p	XLOC_039828	-0.847973	0.0329116	ENSOCUG00000010384	-0.997566	8.88e-06
ocu-miR-452-5p	XLOC_056563	-0.84769	0.0330308	ENSOCUG00000010384	-0.997566	8.88e-06
ocu-miR-452-5p	XLOC_057239	-0.847149	0.0332596	ENSOCUG00000010384	-0.997566	8.88e-06
ocu-miR-452-5p	XLOC_014213	-0.844596	0.034349	ENSOCUG00000010384	-0.997566	8.88e-06
ocu-miR-452-5p	XLOC_065625	-0.843774	0.0347034	ENSOCUG00000010384	-0.997566	8.88e-06
ocu-miR-452-5p	XLOC_031921	-0.839601	0.0365282	ENSOCUG00000010384	-0.997566	8.88e-06
ocu-miR-452-5p	XLOC_063747	-0.838327	0.0370944	ENSOCUG00000010384	-0.997566	8.88e-06
ocu-miR-452-5p	XLOC_069541	-0.835599	0.0383198	ENSOCUG00000010384	-0.997566	8.88e-06
ocu-miR-452-5p	XLOC_069541	-0.833282	0.0393755	ENSOCUG00000010384	-0.997566	8.88e-06
ocu-miR-452-5p	XLOC_010607	-0.827885	0.0418858	ENSOCUG00000010384	-0.997566	8.88e-06
ocu-miR-452-5p	XLOC_047577	-0.827531	0.042053	ENSOCUG00000010384	-0.997566	8.88e-06
ocu-miR-452-5p	XLOC_062893	-0.818915	0.0462188	ENSOCUG00000010384	-0.997566	8.88e-06
ocu-miR-452-5p	XLOC_028030	-0.818534	0.0464069	ENSOCUG00000010384	-0.997566	8.88e-06
ocu-miR-452-5p	XLOC_013546	-0.811441	0.0499799	ENSOCUG00000010384	-0.997566	8.88e-06
ocu-miR-106b-5p	XLOC_055203	-0.882291	0.0199675	ENSOCUG00000008127	-0.995612	2.88e-05
ocu-miR-106b-5p	XLOC_069717	-0.855208	0.0299295	ENSOCUG00000008127	-0.995612	2.88e-05
ocu-miR-106b-5p	XLOC_053429	-0.83222	0.0398635	ENSOCUG00000008127	-0.995612	2.88e-05
ocu-miR-106b-5p	XLOC_061480	-0.83081	0.0405161	ENSOCUG00000008127	-0.995612	2.88e-05
ocu-miR-17-3p	XLOC_055875	-0.990094	0.00014671	ENSOCUG00000000996	-0.995097	3.6e-05
ocu-miR-17-3p	XLOC_027918	-0.956178	0.00283846	ENSOCUG00000000996	-0.995097	3.6e-05
ocu-miR-17-3p	XLOC_068118	-0.942797	0.0048147	ENSOCUG00000000996	-0.995097	3.6e-05
ocu-miR-17-3p	XLOC_069717	-0.931169	0.00694345	ENSOCUG00000000996	-0.995097	3.6e-05
ocu-miR-17-3p	XLOC_077052	-0.907004	0.0125701	ENSOCUG00000000996	-0.995097	3.6e-05
ocu-miR-17-3p	XLOC_070856	-0.90353	0.0135107	ENSOCUG00000000996	-0.995097	3.6e-05
ocu-miR-17-3p	XLOC_072277	-0.892917	0.0165861	ENSOCUG00000000996	-0.995097	3.6e-05
ocu-miR-17-3p	XLOC_013838	-0.872295	0.0234216	ENSOCUG00000000996	-0.995097	3.6e-05
ocu-miR-17-3p	XLOC_015150	-0.856918	0.029244	ENSOCUG00000000996	-0.995097	3.6e-05
ocu-miR-17-3p	XLOC_013786	-0.84656	0.0335095	ENSOCUG00000000996	-0.995097	3.6e-05
ocu-miR-17-3p	XLOC_009948	-0.82133	0.0450327	ENSOCUG00000000996	-0.995097	3.6e-05
ocu-miR-17-3p	XLOC_074522	-0.819535	0.045913	ENSOCUG00000000996	-0.995097	3.6e-05
ocu-miR-17-3p	XLOC_061480	-0.818724	0.046313	ENSOCUG00000000996	-0.995097	3.6e-05
ocu-miR-141-5p	XLOC_069717	-0.879183	0.0210134	ENSOCUG00000002368	-0.99396	5.46e-05
ocu-miR-141-5p	XLOC_037590	-0.855495	0.0298139	ENSOCUG00000002368	-0.99396	5.46e-05
ocu-miR-141-5p	XLOC_052285	-0.854079	0.030386	ENSOCUG00000002368	-0.99396	5.46e-05
ocu-miR-141-5p	XLOC_061480	-0.839912	0.0363908	ENSOCUG00000002368	-0.99396	5.46e-05
ocu-miR-141-5p	XLOC_027918	-0.832755	0.0396172	ENSOCUG00000002368	-0.99396	5.46e-05
ocu-miR-28-5p	XLOC_037416	-0.884519	0.0192336	ENSOCUG00000000049	-0.993455	6.41e-05
ocu-miR-28-5p	XLOC_035393	-0.820622	0.0453787	ENSOCUG00000000049	-0.993455	6.41e-05
ocu-miR-301a-3p	XLOC_013838	-0.844338	0.03446	ENSOCUG00000016002	-0.992999	7.33e-05
ocu-miR-7a-5p	XLOC_061657	-0.907691	0.0123882	ENSOCUG00000005040	-0.992996	7.34e-05
ocu-miR-7a-5p	XLOC_013716	-0.897001	0.0153669	ENSOCUG00000005040	-0.992996	7.34e-05
ocu-miR-7a-5p	XLOC_077052	-0.886539	0.0185799	ENSOCUG00000005040	-0.992996	7.34e-05
ocu-miR-7a-5p	XLOC_071193	-0.875934	0.0221338	ENSOCUG00000005040	-0.992996	7.34e-05
ocu-miR-7a-5p	XLOC_069717	-0.868004	0.0249845	ENSOCUG00000005040	-0.992996	7.34e-05
ocu-miR-7a-5p	XLOC_040494	-0.860638	0.0277792	ENSOCUG00000005040	-0.992996	7.34e-05
ocu-miR-7a-5p	XLOC_006528	-0.849621	0.0322206	ENSOCUG00000005040	-0.992996	7.34e-05
ocu-miR-7a-5p	XLOC_060914	-0.847809	0.0329807	ENSOCUG00000005040	-0.992996	7.34e-05
ocu-miR-7a-5p	XLOC_048607	-0.847796	0.032986	ENSOCUG00000005040	-0.992996	7.34e-05
ocu-miR-7a-5p	XLOC_072331	-0.839228	0.0366937	ENSOCUG00000005040	-0.992996	7.34e-05
ocu-miR-7a-5p	XLOC_015155	-0.835554	0.0383401	ENSOCUG00000005040	-0.992996	7.34e-05
ocu-miR-7a-5p	XLOC_054413	-0.829853	0.040962	ENSOCUG00000005040	-0.992996	7.34e-05
ocu-miR-7a-5p	XLOC_054118	-0.826394	0.0425923	ENSOCUG00000005040	-0.992996	7.34e-05
ocu-miR-7a-5p	XLOC_035023	-0.825393	0.0430696	ENSOCUG00000005040	-0.992996	7.34e-05
ocu-miR-7a-5p	XLOC_047868	-0.819002	0.0461756	ENSOCUG00000005040	-0.992996	7.34e-05
ocu-miR-7a-5p	XLOC_007209	-0.817562	0.0468892	ENSOCUG00000005040	-0.992996	7.34e-05
ocu-miR-1343-3p	XLOC_004142	-0.951923	0.00341155	ENSOCUG00000008915	-0.9929	7.54e-05
ocu-miR-1343-3p	XLOC_016764	-0.859781	0.0281135	ENSOCUG00000008915	-0.9929	7.54e-05
ocu-miR-1343-3p	XLOC_065343	-0.857667	0.0289462	ENSOCUG00000008915	-0.9929	7.54e-05
ocu-miR-1343-3p	XLOC_073875	-0.855536	0.0297972	ENSOCUG00000008915	-0.9929	7.54e-05
ocu-miR-191-3p	XLOC_005253	-0.979536	0.000623888	ENSOCUG00000000227	-0.992808	7.74e-05
ocu-miR-421-3p	XLOC_070856	-0.965365	0.00177862	ENSOCUG00000020935	-0.992797	7.76e-05
ocu-miR-421-3p	XLOC_013716	-0.878767	0.0211554	ENSOCUG00000020935	-0.992797	7.76e-05
ocu-miR-148b-5p	XLOC_032005	-0.970743	0.00127146	ENSOCUG00000023825	-0.991916	9.78e-05
ocu-miR-148b-5p	XLOC_020951	-0.966101	0.00170419	ENSOCUG00000023825	-0.991916	9.78e-05
ocu-miR-148b-5p	XLOC_033782	-0.960439	0.00231667	ENSOCUG00000023825	-0.991916	9.78e-05
ocu-miR-148b-5p	XLOC_021052	-0.959944	0.00237455	ENSOCUG00000023825	-0.991916	9.78e-05
ocu-miR-148b-5p	XLOC_030906	-0.957471	0.00267467	ENSOCUG00000023825	-0.991916	9.78e-05
ocu-miR-148b-5p	XLOC_025564	-0.947854	0.00400787	ENSOCUG00000023825	-0.991916	9.78e-05
ocu-miR-148b-5p	XLOC_032005	-0.896198	0.0156031	ENSOCUG00000023825	-0.991916	9.78e-05
ocu-miR-148b-5p	XLOC_025564	-0.878273	0.0213244	ENSOCUG00000023825	-0.991916	9.78e-05
ocu-miR-148b-5p	XLOC_073502	-0.844475	0.0344011	ENSOCUG00000023825	-0.991916	9.78e-05
ocu-miR-148b-5p	XLOC_057581	-0.841859	0.0355356	ENSOCUG00000023825	-0.991916	9.78e-05
ocu-miR-148b-5p	XLOC_050476	-0.817007	0.0471656	ENSOCUG00000023825	-0.991916	9.78e-05
ocu-miR-1249-5p	XLOC_071193	-0.985509	0.000313471	ENSOCUG00000000540	-0.991822	0.000100034
ocu-miR-1249-5p	XLOC_035023	-0.984673	0.000350573	ENSOCUG00000000540	-0.991822	0.000100034
ocu-miR-1249-5p	XLOC_062719	-0.96251	0.00208195	ENSOCUG00000000540	-0.991822	0.000100034
ocu-miR-1249-5p	XLOC_069852	-0.935212	0.00616019	ENSOCUG00000000540	-0.991822	0.000100034
ocu-miR-1249-5p	XLOC_034563	-0.90874	0.0121125	ENSOCUG00000000540	-0.991822	0.000100034
ocu-miR-1249-5p	XLOC_054413	-0.905965	0.012848	ENSOCUG00000000540	-0.991822	0.000100034
ocu-miR-1249-5p	XLOC_058032	-0.879771	0.0208136	ENSOCUG00000000540	-0.991822	0.000100034
ocu-miR-1249-5p	XLOC_044121	-0.868488	0.0248057	ENSOCUG00000000540	-0.991822	0.000100034
ocu-miR-1249-5p	XLOC_061493	-0.862947	0.0268882	ENSOCUG00000000540	-0.991822	0.000100034
ocu-miR-1249-5p	XLOC_040494	-0.862537	0.0270454	ENSOCUG00000000540	-0.991822	0.000100034
ocu-miR-1249-5p	XLOC_042760	-0.857471	0.0290239	ENSOCUG00000000540	-0.991822	0.000100034
ocu-miR-1249-5p	XLOC_004867	-0.852802	0.0309061	ENSOCUG00000000540	-0.991822	0.000100034
ocu-miR-1249-5p	XLOC_034563	-0.839953	0.036373	ENSOCUG00000000540	-0.991822	0.000100034
ocu-miR-1249-5p	XLOC_013716	-0.814239	0.0485559	ENSOCUG00000000540	-0.991822	0.000100034
ocu-miR-1249-5p	XLOC_013716	-0.812106	0.0496397	ENSOCUG00000000540	-0.991822	0.000100034
ocu-miR-185-3p	XLOC_066658	-0.928236	0.00754023	ENSOCUG00000005897	-0.991756	0.000101653
ocu-miR-185-3p	XLOC_025346	-0.89677	0.0154347	ENSOCUG00000005897	-0.991756	0.000101653
ocu-miR-185-3p	XLOC_040494	-0.885277	0.0189872	ENSOCUG00000005897	-0.991756	0.000101653
ocu-miR-185-3p	XLOC_015737	-0.875587	0.0222551	ENSOCUG00000005897	-0.991756	0.000101653
ocu-miR-185-3p	XLOC_013910	-0.873362	0.0230402	ENSOCUG00000005897	-0.991756	0.000101653
ocu-miR-185-3p	XLOC_061480	-0.857699	0.0289336	ENSOCUG00000005897	-0.991756	0.000101653
ocu-miR-185-3p	XLOC_040494	-0.816567	0.0473856	ENSOCUG00000005897	-0.991756	0.000101653
ocu-miR-449a-5p	XLOC_073275	-0.903942	0.0133976	ENSOCUG00000029430	-0.991734	0.000102205
ocu-miR-449a-5p	XLOC_050476	-0.888607	0.0179216	ENSOCUG00000029430	-0.991734	0.000102205
ocu-miR-449a-5p	XLOC_070374	-0.887582	0.0182464	ENSOCUG00000029430	-0.991734	0.000102205
ocu-miR-16b-5p	XLOC_069717	-0.909033	0.0120361	ENSOCUG00000012633	-0.991646	0.000104398
ocu-miR-16b-5p	XLOC_048321	-0.881793	0.0201335	ENSOCUG00000012633	-0.991646	0.000104398
ocu-miR-16b-5p	XLOC_052285	-0.87254	0.0233339	ENSOCUG00000012633	-0.991646	0.000104398
ocu-miR-16b-5p	XLOC_061480	-0.856909	0.0292476	ENSOCUG00000012633	-0.991646	0.000104398
ocu-miR-16b-5p	XLOC_037590	-0.844571	0.0343596	ENSOCUG00000012633	-0.991646	0.000104398
ocu-miR-16b-5p	XLOC_060914	-0.82013	0.0456203	ENSOCUG00000012633	-0.991646	0.000104398
ocu-miR-148b-5p	XLOC_032005	-0.970743	0.00127146	ENSOCUG00000003144	-0.991634	0.000104694
ocu-miR-148b-5p	XLOC_020951	-0.966101	0.00170419	ENSOCUG00000003144	-0.991634	0.000104694
ocu-miR-148b-5p	XLOC_033782	-0.960439	0.00231667	ENSOCUG00000003144	-0.991634	0.000104694
ocu-miR-148b-5p	XLOC_021052	-0.959944	0.00237455	ENSOCUG00000003144	-0.991634	0.000104694
ocu-miR-148b-5p	XLOC_030906	-0.957471	0.00267467	ENSOCUG00000003144	-0.991634	0.000104694
ocu-miR-148b-5p	XLOC_025564	-0.947854	0.00400787	ENSOCUG00000003144	-0.991634	0.000104694
ocu-miR-148b-5p	XLOC_032005	-0.896198	0.0156031	ENSOCUG00000003144	-0.991634	0.000104694
ocu-miR-148b-5p	XLOC_025564	-0.878273	0.0213244	ENSOCUG00000003144	-0.991634	0.000104694
ocu-miR-148b-5p	XLOC_073502	-0.844475	0.0344011	ENSOCUG00000003144	-0.991634	0.000104694
ocu-miR-148b-5p	XLOC_057581	-0.841859	0.0355356	ENSOCUG00000003144	-0.991634	0.000104694
ocu-miR-148b-5p	XLOC_050476	-0.817007	0.0471656	ENSOCUG00000003144	-0.991634	0.000104694
ocu-miR-146b-3p	XLOC_070856	-0.953833	0.00314789	ENSOCUG00000004837	-0.991501	0.000108039
ocu-miR-146b-3p	XLOC_061480	-0.921357	0.00903394	ENSOCUG00000004837	-0.991501	0.000108039
ocu-miR-146b-3p	XLOC_005253	-0.903626	0.0134845	ENSOCUG00000004837	-0.991501	0.000108039
ocu-miR-146b-3p	XLOC_069717	-0.884073	0.0193796	ENSOCUG00000004837	-0.991501	0.000108039
ocu-miR-146b-3p	XLOC_074984	-0.878152	0.0213658	ENSOCUG00000004837	-0.991501	0.000108039
ocu-miR-146b-3p	XLOC_061469	-0.857372	0.0290635	ENSOCUG00000004837	-0.991501	0.000108039
ocu-miR-146b-3p	XLOC_013716	-0.857312	0.0290871	ENSOCUG00000004837	-0.991501	0.000108039
ocu-miR-146b-3p	XLOC_074487	-0.821036	0.0451762	ENSOCUG00000004837	-0.991501	0.000108039
ocu-miR-146b-3p	XLOC_077469	-0.813776	0.0487901	ENSOCUG00000004837	-0.991501	0.000108039
ocu-miR-7180-5p	XLOC_005253	-0.93706	0.00581743	ENSOCUG00000015035	-0.990935	0.000122882
ocu-miR-7180-5p	XLOC_069717	-0.848735	0.0325911	ENSOCUG00000015035	-0.990935	0.000122882
ocu-miR-146b-3p	XLOC_070856	-0.953833	0.00314789	ENSOCUG00000021527	-0.990426	0.000137054
ocu-miR-146b-3p	XLOC_061480	-0.921357	0.00903394	ENSOCUG00000021527	-0.990426	0.000137054
ocu-miR-146b-3p	XLOC_005253	-0.903626	0.0134845	ENSOCUG00000021527	-0.990426	0.000137054
ocu-miR-146b-3p	XLOC_069717	-0.884073	0.0193796	ENSOCUG00000021527	-0.990426	0.000137054
ocu-miR-146b-3p	XLOC_074984	-0.878152	0.0213658	ENSOCUG00000021527	-0.990426	0.000137054
ocu-miR-146b-3p	XLOC_061469	-0.857372	0.0290635	ENSOCUG00000021527	-0.990426	0.000137054
ocu-miR-146b-3p	XLOC_013716	-0.857312	0.0290871	ENSOCUG00000021527	-0.990426	0.000137054
ocu-miR-146b-3p	XLOC_074487	-0.821036	0.0451762	ENSOCUG00000021527	-0.990426	0.000137054
ocu-miR-146b-3p	XLOC_077469	-0.813776	0.0487901	ENSOCUG00000021527	-0.990426	0.000137054
ocu-miR-153-3p	XLOC_052285	-0.910585	0.0116352	ENSOCUG00000005778	-0.99031	0.000140384
ocu-miR-153-3p	XLOC_021459	-0.868624	0.0247559	ENSOCUG00000005778	-0.99031	0.000140384
ocu-miR-153-3p	XLOC_014121	-0.859865	0.0280807	ENSOCUG00000005778	-0.99031	0.000140384
ocu-miR-146a-5p	XLOC_057306	-0.964536	0.00186427	ENSOCUG00000007943	-0.990264	0.000141715
ocu-miR-146a-5p	XLOC_021052	-0.93083	0.00701125	ENSOCUG00000007943	-0.990264	0.000141715
ocu-miR-146a-5p	XLOC_071900	-0.831193	0.0403386	ENSOCUG00000007943	-0.990264	0.000141715
ocu-miR-146a-5p	XLOC_004522	-0.825559	0.0429903	ENSOCUG00000007943	-0.990264	0.000141715
ocu-miR-146b-5p	XLOC_009948	-0.956762	0.00276392	ENSOCUG00000017640	-0.990196	0.000143707
ocu-miR-146b-5p	XLOC_004522	-0.925082	0.00820873	ENSOCUG00000017640	-0.990196	0.000143707
ocu-miR-146b-5p	XLOC_028715	-0.920292	0.00927682	ENSOCUG00000017640	-0.990196	0.000143707
ocu-miR-146b-5p	XLOC_077136	-0.910173	0.0117409	ENSOCUG00000017640	-0.990196	0.000143707
ocu-miR-146b-5p	XLOC_028672	-0.899653	0.0145989	ENSOCUG00000017640	-0.990196	0.000143707
ocu-miR-146b-5p	XLOC_073384	-0.892841	0.0166093	ENSOCUG00000017640	-0.990196	0.000143707
ocu-miR-146b-5p	XLOC_057306	-0.83477	0.0386958	ENSOCUG00000017640	-0.990196	0.000143707
ocu-miR-146b-5p	XLOC_038520	-0.831562	0.0401674	ENSOCUG00000017640	-0.990196	0.000143707
ocu-miR-146b-5p	XLOC_018562	-0.817779	0.0467816	ENSOCUG00000017640	-0.990196	0.000143707
ocu-miR-146b-5p	XLOC_071900	-0.817604	0.0468682	ENSOCUG00000017640	-0.990196	0.000143707
ocu-miR-186-3p	XLOC_008201	-0.884515	0.0192352	ENSOCUG00000004114	-0.990182	0.000144121
ocu-miR-186-3p	XLOC_055203	-0.838003	0.0372391	ENSOCUG00000004114	-0.990182	0.000144121
ocu-miR-186-3p	XLOC_046949	-0.816407	0.0474654	ENSOCUG00000004114	-0.990182	0.000144121
ocu-miR-181d-5p	XLOC_065024	-0.963484	0.00197575	ENSOCUG00000023884	-0.989543	0.000163465
ocu-miR-181d-5p	XLOC_066879	-0.907554	0.0124244	ENSOCUG00000023884	-0.989543	0.000163465
ocu-miR-181d-5p	XLOC_022364	-0.863062	0.0268442	ENSOCUG00000023884	-0.989543	0.000163465
ocu-miR-181d-5p	XLOC_010690	-0.863046	0.0268503	ENSOCUG00000023884	-0.989543	0.000163465
ocu-miR-181d-5p	XLOC_050476	-0.861369	0.0274955	ENSOCUG00000023884	-0.989543	0.000163465
ocu-miR-376a-3p	XLOC_042055	-0.869196	0.0245454	ENSOCUG00000008480	-0.988283	0.00020512
ocu-miR-450a-2-3p	XLOC_028407	-0.974433	0.000972164	ENSOCUG00000012915	-0.987998	0.000215216
ocu-miR-450a-2-3p	XLOC_004535	-0.86404	0.0264712	ENSOCUG00000012915	-0.987998	0.000215216
ocu-miR-450a-2-3p	XLOC_002773	-0.843257	0.0349272	ENSOCUG00000012915	-0.987998	0.000215216
ocu-miR-450a-2-3p	XLOC_050476	-0.823058	0.044193	ENSOCUG00000012915	-0.987998	0.000215216
ocu-miR-146b-3p	XLOC_070856	-0.953833	0.00314789	ENSOCUG00000027275	-0.98782	0.000221611
ocu-miR-146b-3p	XLOC_061480	-0.921357	0.00903394	ENSOCUG00000027275	-0.98782	0.000221611
ocu-miR-146b-3p	XLOC_005253	-0.903626	0.0134845	ENSOCUG00000027275	-0.98782	0.000221611
ocu-miR-146b-3p	XLOC_069717	-0.884073	0.0193796	ENSOCUG00000027275	-0.98782	0.000221611
ocu-miR-146b-3p	XLOC_074984	-0.878152	0.0213658	ENSOCUG00000027275	-0.98782	0.000221611
ocu-miR-146b-3p	XLOC_061469	-0.857372	0.0290635	ENSOCUG00000027275	-0.98782	0.000221611
ocu-miR-146b-3p	XLOC_013716	-0.857312	0.0290871	ENSOCUG00000027275	-0.98782	0.000221611
ocu-miR-146b-3p	XLOC_074487	-0.821036	0.0451762	ENSOCUG00000027275	-0.98782	0.000221611
ocu-miR-146b-3p	XLOC_077469	-0.813776	0.0487901	ENSOCUG00000027275	-0.98782	0.000221611
ocu-miR-1343-3p	XLOC_004142	-0.951923	0.00341155	ENSOCUG00000007039	-0.987805	0.000222157
ocu-miR-1343-3p	XLOC_016764	-0.859781	0.0281135	ENSOCUG00000007039	-0.987805	0.000222157
ocu-miR-1343-3p	XLOC_065343	-0.857667	0.0289462	ENSOCUG00000007039	-0.987805	0.000222157
ocu-miR-1343-3p	XLOC_073875	-0.855536	0.0297972	ENSOCUG00000007039	-0.987805	0.000222157
ocu-miR-29a-5p	XLOC_030906	-0.952261	0.00336413	ENSOCUG00000009346	-0.987735	0.000224738
ocu-miR-29a-5p	XLOC_033714	-0.901081	0.0141935	ENSOCUG00000009346	-0.987735	0.000224738
ocu-miR-29a-5p	XLOC_067465	-0.833469	0.0392897	ENSOCUG00000009346	-0.987735	0.000224738
ocu-miR-29a-5p	XLOC_064183	-0.827436	0.0420983	ENSOCUG00000009346	-0.987735	0.000224738
ocu-miR-29a-5p	XLOC_050476	-0.82441	0.0435407	ENSOCUG00000009346	-0.987735	0.000224738
ocu-miR-200c-3p	XLOC_061480	-0.815581	0.0478793	ENSOCUG00000016267	-0.987407	0.000236873
ocu-miR-106b-3p	XLOC_074984	-0.934286	0.00633552	ENSOCUG00000014493	-0.987067	0.000249823
novel_156	XLOC_028502	-0.888068	0.0180919	ENSOCUG00000013782	-0.986884	0.000256925
novel_156	XLOC_055203	-0.886649	0.0185443	ENSOCUG00000013782	-0.986884	0.000256925
novel_156	XLOC_024587	-0.885756	0.018832	ENSOCUG00000013782	-0.986884	0.000256925
novel_156	XLOC_061318	-0.874433	0.0226608	ENSOCUG00000013782	-0.986884	0.000256925
novel_156	XLOC_021459	-0.869596	0.0243992	ENSOCUG00000013782	-0.986884	0.000256925
novel_156	XLOC_031915	-0.862892	0.0269093	ENSOCUG00000013782	-0.986884	0.000256925
novel_156	XLOC_055203	-0.838313	0.0371005	ENSOCUG00000013782	-0.986884	0.000256925
novel_156	XLOC_046949	-0.831662	0.0401214	ENSOCUG00000013782	-0.986884	0.000256925
novel_156	XLOC_055203	-0.822725	0.0443539	ENSOCUG00000013782	-0.986884	0.000256925
novel_156	XLOC_022876	-0.814282	0.048534	ENSOCUG00000013782	-0.986884	0.000256925
ocu-miR-1249-5p	XLOC_071193	-0.985509	0.000313471	ENSOCUG00000026988	-0.986874	0.000257288
ocu-miR-1249-5p	XLOC_035023	-0.984673	0.000350573	ENSOCUG00000026988	-0.986874	0.000257288
ocu-miR-1249-5p	XLOC_062719	-0.96251	0.00208195	ENSOCUG00000026988	-0.986874	0.000257288
ocu-miR-1249-5p	XLOC_069852	-0.935212	0.00616019	ENSOCUG00000026988	-0.986874	0.000257288
ocu-miR-1249-5p	XLOC_034563	-0.90874	0.0121125	ENSOCUG00000026988	-0.986874	0.000257288
ocu-miR-1249-5p	XLOC_054413	-0.905965	0.012848	ENSOCUG00000026988	-0.986874	0.000257288
ocu-miR-1249-5p	XLOC_058032	-0.879771	0.0208136	ENSOCUG00000026988	-0.986874	0.000257288
ocu-miR-1249-5p	XLOC_044121	-0.868488	0.0248057	ENSOCUG00000026988	-0.986874	0.000257288
ocu-miR-1249-5p	XLOC_061493	-0.862947	0.0268882	ENSOCUG00000026988	-0.986874	0.000257288
ocu-miR-1249-5p	XLOC_040494	-0.862537	0.0270454	ENSOCUG00000026988	-0.986874	0.000257288
ocu-miR-1249-5p	XLOC_042760	-0.857471	0.0290239	ENSOCUG00000026988	-0.986874	0.000257288
ocu-miR-1249-5p	XLOC_004867	-0.852802	0.0309061	ENSOCUG00000026988	-0.986874	0.000257288
ocu-miR-1249-5p	XLOC_034563	-0.839953	0.036373	ENSOCUG00000026988	-0.986874	0.000257288
ocu-miR-1249-5p	XLOC_013716	-0.814239	0.0485559	ENSOCUG00000026988	-0.986874	0.000257288
ocu-miR-1249-5p	XLOC_013716	-0.812106	0.0496397	ENSOCUG00000026988	-0.986874	0.000257288
ocu-miR-146b-5p	XLOC_009948	-0.956762	0.00276392	ENSOCUG00000003908	-0.986496	0.000272287
ocu-miR-146b-5p	XLOC_004522	-0.925082	0.00820873	ENSOCUG00000003908	-0.986496	0.000272287
ocu-miR-146b-5p	XLOC_028715	-0.920292	0.00927682	ENSOCUG00000003908	-0.986496	0.000272287
ocu-miR-146b-5p	XLOC_077136	-0.910173	0.0117409	ENSOCUG00000003908	-0.986496	0.000272287
ocu-miR-146b-5p	XLOC_028672	-0.899653	0.0145989	ENSOCUG00000003908	-0.986496	0.000272287
ocu-miR-146b-5p	XLOC_073384	-0.892841	0.0166093	ENSOCUG00000003908	-0.986496	0.000272287
ocu-miR-146b-5p	XLOC_057306	-0.83477	0.0386958	ENSOCUG00000003908	-0.986496	0.000272287
ocu-miR-146b-5p	XLOC_038520	-0.831562	0.0401674	ENSOCUG00000003908	-0.986496	0.000272287
ocu-miR-146b-5p	XLOC_018562	-0.817779	0.0467816	ENSOCUG00000003908	-0.986496	0.000272287
ocu-miR-146b-5p	XLOC_071900	-0.817604	0.0468682	ENSOCUG00000003908	-0.986496	0.000272287
ocu-miR-17-5p	XLOC_005253	-0.949251	0.00379781	ENSOCUG00000008127	-0.986471	0.000273308
ocu-miR-17-5p	XLOC_069717	-0.894175	0.0162058	ENSOCUG00000008127	-0.986471	0.000273308
ocu-miR-17-5p	XLOC_053429	-0.852249	0.0311327	ENSOCUG00000008127	-0.986471	0.000273308
ocu-miR-17-5p	XLOC_055203	-0.847994	0.0329027	ENSOCUG00000008127	-0.986471	0.000273308
ocu-miR-17-5p	XLOC_061480	-0.836424	0.0379472	ENSOCUG00000008127	-0.986471	0.000273308
ocu-miR-350-5p	XLOC_052285	-0.985977	0.000293603	ENSOCUG00000026068	-0.986227	0.000283222
ocu-miR-350-5p	XLOC_055203	-0.940865	0.00514206	ENSOCUG00000026068	-0.986227	0.000283222
ocu-miR-350-5p	XLOC_008201	-0.879447	0.0209236	ENSOCUG00000026068	-0.986227	0.000283222
ocu-miR-350-5p	XLOC_053429	-0.850195	0.0319815	ENSOCUG00000026068	-0.986227	0.000283222
ocu-miR-350-5p	XLOC_047308	-0.820731	0.0453254	ENSOCUG00000026068	-0.986227	0.000283222
ocu-miR-350-5p	XLOC_020951	-0.816242	0.0475483	ENSOCUG00000026068	-0.986227	0.000283222
ocu-miR-329-3p	XLOC_076872	-0.916661	0.0101286	ENSOCUG00000002695	-0.986159	0.00028603
ocu-miR-329-3p	XLOC_035834	-0.907028	0.0125638	ENSOCUG00000002695	-0.986159	0.00028603
ocu-miR-329-3p	XLOC_025813	-0.886787	0.0185003	ENSOCUG00000002695	-0.986159	0.00028603
ocu-miR-329-3p	XLOC_066722	-0.874609	0.0225986	ENSOCUG00000002695	-0.986159	0.00028603
ocu-miR-329-3p	XLOC_034563	-0.866235	0.0256429	ENSOCUG00000002695	-0.986159	0.00028603
ocu-miR-329-3p	XLOC_069960	-0.854119	0.0303697	ENSOCUG00000002695	-0.986159	0.00028603
ocu-miR-329-3p	XLOC_069960	-0.833012	0.0394995	ENSOCUG00000002695	-0.986159	0.00028603
ocu-miR-329-3p	XLOC_072977	-0.816374	0.0474822	ENSOCUG00000002695	-0.986159	0.00028603
ocu-miR-146b-3p	XLOC_070856	-0.953833	0.00314789	ENSOCUG00000020935	-0.986094	0.000288716
ocu-miR-146b-3p	XLOC_061480	-0.921357	0.00903394	ENSOCUG00000020935	-0.986094	0.000288716
ocu-miR-146b-3p	XLOC_005253	-0.903626	0.0134845	ENSOCUG00000020935	-0.986094	0.000288716
ocu-miR-146b-3p	XLOC_069717	-0.884073	0.0193796	ENSOCUG00000020935	-0.986094	0.000288716
ocu-miR-146b-3p	XLOC_074984	-0.878152	0.0213658	ENSOCUG00000020935	-0.986094	0.000288716
ocu-miR-146b-3p	XLOC_061469	-0.857372	0.0290635	ENSOCUG00000020935	-0.986094	0.000288716
ocu-miR-146b-3p	XLOC_013716	-0.857312	0.0290871	ENSOCUG00000020935	-0.986094	0.000288716
ocu-miR-146b-3p	XLOC_074487	-0.821036	0.0451762	ENSOCUG00000020935	-0.986094	0.000288716
ocu-miR-146b-3p	XLOC_077469	-0.813776	0.0487901	ENSOCUG00000020935	-0.986094	0.000288716
ocu-miR-30c-3p	XLOC_045965	-0.906911	0.012595	ENSOCUG00000016945	-0.985933	0.000295443
ocu-miR-30c-3p	XLOC_055203	-0.873095	0.0231356	ENSOCUG00000016945	-0.985933	0.000295443
ocu-miR-130a-3p	XLOC_001329	-0.951735	0.0034381	ENSOCUG00000001302	-0.985917	0.000296121
ocu-miR-130a-3p	XLOC_069317	-0.875618	0.0222442	ENSOCUG00000001302	-0.985917	0.000296121
ocu-miR-130a-3p	XLOC_050476	-0.86457	0.0262701	ENSOCUG00000001302	-0.985917	0.000296121
ocu-miR-130a-3p	XLOC_058286	-0.858568	0.0285901	ENSOCUG00000001302	-0.985917	0.000296121
ocu-miR-502a-5p	XLOC_073502	-0.958178	0.00258708	ENSOCUG00000012530	-0.985849	0.000298948
ocu-miR-502a-5p	XLOC_025564	-0.936596	0.00590269	ENSOCUG00000012530	-0.985849	0.000298948
ocu-miR-502a-5p	XLOC_016565	-0.91539	0.0104353	ENSOCUG00000012530	-0.985849	0.000298948
ocu-miR-502a-5p	XLOC_001329	-0.884646	0.0191924	ENSOCUG00000012530	-0.985849	0.000298948
ocu-miR-424-3p	XLOC_068118	-0.897064	0.0153485	ENSOCUG00000004135	-0.98574	0.000303583
ocu-miR-424-3p	XLOC_050476	-0.866691	0.0254725	ENSOCUG00000004135	-0.98574	0.000303583
ocu-miR-424-3p	XLOC_037342	-0.859252	0.0283211	ENSOCUG00000004135	-0.98574	0.000303583
ocu-miR-214-3p	XLOC_002773	-0.919426	0.00947674	ENSOCUG00000016823	-0.985501	0.00031379
ocu-miR-214-3p	XLOC_058242	-0.918474	0.00969879	ENSOCUG00000016823	-0.985501	0.00031379
ocu-miR-214-3p	XLOC_062854	-0.891979	0.0168725	ENSOCUG00000016823	-0.985501	0.00031379
ocu-miR-214-3p	XLOC_072231	-0.872262	0.0234332	ENSOCUG00000016823	-0.985501	0.00031379
ocu-miR-214-3p	XLOC_065024	-0.826519	0.0425328	ENSOCUG00000016823	-0.985501	0.00031379
ocu-miR-214-3p	XLOC_039828	-0.813141	0.0491124	ENSOCUG00000016823	-0.985501	0.00031379
ocu-miR-495-3p	XLOC_010450	-0.914971	0.0105376	ENSOCUG00000005919	-0.985385	0.000318825
ocu-miR-495-3p	XLOC_036516	-0.907114	0.0125409	ENSOCUG00000005919	-0.985385	0.000318825
ocu-miR-495-3p	XLOC_057299	-0.870471	0.0240799	ENSOCUG00000005919	-0.985385	0.000318825
ocu-miR-495-3p	XLOC_068275	-0.864738	0.0262063	ENSOCUG00000005919	-0.985385	0.000318825
ocu-miR-495-3p	XLOC_028680	-0.857154	0.0291502	ENSOCUG00000005919	-0.985385	0.000318825
ocu-miR-495-3p	XLOC_051131	-0.847162	0.0332542	ENSOCUG00000005919	-0.985385	0.000318825
ocu-miR-495-3p	XLOC_007967	-0.830443	0.040687	ENSOCUG00000005919	-0.985385	0.000318825
ocu-miR-495-3p	XLOC_069159	-0.817461	0.0469395	ENSOCUG00000005919	-0.985385	0.000318825
ocu-miR-423-5p	XLOC_070856	-0.925975	0.00801665	ENSOCUG00000013146	-0.984796	0.00034498
ocu-miR-423-5p	XLOC_006528	-0.904819	0.013158	ENSOCUG00000013146	-0.984796	0.00034498
ocu-miR-423-5p	XLOC_040494	-0.884102	0.0193702	ENSOCUG00000013146	-0.984796	0.00034498
ocu-miR-423-5p	XLOC_013482	-0.864242	0.0263942	ENSOCUG00000013146	-0.984796	0.00034498
ocu-miR-423-5p	XLOC_034223	-0.86299	0.0268715	ENSOCUG00000013146	-0.984796	0.00034498
ocu-miR-423-5p	XLOC_015737	-0.858863	0.0284738	ENSOCUG00000013146	-0.984796	0.00034498
ocu-miR-423-5p	XLOC_072277	-0.827545	0.0420466	ENSOCUG00000013146	-0.984796	0.00034498
ocu-miR-423-5p	XLOC_020404	-0.81657	0.0473841	ENSOCUG00000013146	-0.984796	0.00034498
ocu-miR-424-5p	XLOC_058242	-0.874414	0.0226675	ENSOCUG00000027132	-0.98479	0.000345258
ocu-miR-424-5p	XLOC_050476	-0.855486	0.0298173	ENSOCUG00000027132	-0.98479	0.000345258
ocu-miR-424-5p	XLOC_039828	-0.82015	0.0456105	ENSOCUG00000027132	-0.98479	0.000345258
ocu-miR-424-5p	XLOC_029150	-0.813394	0.0489837	ENSOCUG00000027132	-0.98479	0.000345258
ocu-miR-424-5p	XLOC_072231	-0.812212	0.0495854	ENSOCUG00000027132	-0.98479	0.000345258
ocu-miR-491-5p	XLOC_007521	-0.932556	0.00666969	ENSOCUG00000015987	-0.984768	0.000346241
ocu-miR-491-5p	XLOC_074487	-0.918783	0.00962634	ENSOCUG00000015987	-0.984768	0.000346241
ocu-miR-491-5p	XLOC_061469	-0.874571	0.0226118	ENSOCUG00000015987	-0.984768	0.000346241
ocu-miR-491-5p	XLOC_015331	-0.831888	0.0400168	ENSOCUG00000015987	-0.984768	0.000346241
ocu-miR-491-5p	XLOC_072277	-0.81837	0.0464883	ENSOCUG00000015987	-0.984768	0.000346241
ocu-miR-222-5p	XLOC_052285	-0.957191	0.00270974	ENSOCUG00000007442	-0.984687	0.000349951
ocu-miR-222-5p	XLOC_015331	-0.824931	0.0432909	ENSOCUG00000007442	-0.984687	0.000349951
ocu-miR-324-3p	XLOC_052285	-0.986484	0.000272805	ENSOCUG00000005785	-0.984684	0.000350095
ocu-miR-324-3p	XLOC_058334	-0.88	0.0207359	ENSOCUG00000005785	-0.984684	0.000350095
ocu-miR-324-3p	XLOC_052494	-0.854751	0.0301138	ENSOCUG00000005785	-0.984684	0.000350095
ocu-miR-324-3p	XLOC_069317	-0.831904	0.0400093	ENSOCUG00000005785	-0.984684	0.000350095
ocu-miR-324-3p	XLOC_015331	-0.812247	0.0495673	ENSOCUG00000005785	-0.984684	0.000350095
ocu-let-7f-3p	XLOC_013838	-0.933304	0.00652409	ENSOCUG00000010051	-0.984543	0.000356545
ocu-let-7f-3p	XLOC_061469	-0.931951	0.00678838	ENSOCUG00000010051	-0.984543	0.000356545
ocu-let-7f-3p	XLOC_070856	-0.830591	0.0406181	ENSOCUG00000010051	-0.984543	0.000356545
ocu-miR-219a-3p	XLOC_073384	-0.901483	0.0140803	ENSOCUG00000005187	-0.984114	0.00037654
ocu-miR-219a-3p	XLOC_035753	-0.870664	0.02401	ENSOCUG00000005187	-0.984114	0.00037654
ocu-miR-219a-3p	XLOC_005570	-0.868208	0.0249091	ENSOCUG00000005187	-0.984114	0.00037654
ocu-miR-219a-3p	XLOC_029032	-0.865376	0.0259656	ENSOCUG00000005187	-0.984114	0.00037654
ocu-miR-219a-3p	XLOC_019478	-0.819134	0.0461106	ENSOCUG00000005187	-0.984114	0.00037654
ocu-miR-138-5p	XLOC_020771	-0.968101	0.00151013	ENSOCUG00000029328	-0.984108	0.000376837
ocu-miR-138-5p	XLOC_058820	-0.933628	0.00646163	ENSOCUG00000029328	-0.984108	0.000376837
ocu-miR-138-5p	XLOC_066888	-0.933305	0.00652406	ENSOCUG00000029328	-0.984108	0.000376837
ocu-miR-138-5p	XLOC_076894	-0.932173	0.00674481	ENSOCUG00000029328	-0.984108	0.000376837
ocu-miR-138-5p	XLOC_039779	-0.929198	0.00734188	ENSOCUG00000029328	-0.984108	0.000376837
ocu-miR-138-5p	XLOC_065024	-0.925653	0.00808571	ENSOCUG00000029328	-0.984108	0.000376837
ocu-miR-138-5p	XLOC_028030	-0.92077	0.00916744	ENSOCUG00000029328	-0.984108	0.000376837
ocu-miR-138-5p	XLOC_069541	-0.916252	0.0102268	ENSOCUG00000029328	-0.984108	0.000376837
ocu-miR-138-5p	XLOC_050476	-0.911835	0.011317	ENSOCUG00000029328	-0.984108	0.000376837
ocu-miR-138-5p	XLOC_015746	-0.911542	0.0113912	ENSOCUG00000029328	-0.984108	0.000376837
ocu-miR-138-5p	XLOC_069355	-0.907756	0.012371	ENSOCUG00000029328	-0.984108	0.000376837
ocu-miR-138-5p	XLOC_047577	-0.899623	0.0146075	ENSOCUG00000029328	-0.984108	0.000376837
ocu-miR-138-5p	XLOC_030128	-0.895073	0.0159369	ENSOCUG00000029328	-0.984108	0.000376837
ocu-miR-138-5p	XLOC_014687	-0.894855	0.016002	ENSOCUG00000029328	-0.984108	0.000376837
ocu-miR-138-5p	XLOC_024816	-0.889516	0.0176357	ENSOCUG00000029328	-0.984108	0.000376837
ocu-miR-138-5p	XLOC_017389	-0.884003	0.0194024	ENSOCUG00000029328	-0.984108	0.000376837
ocu-miR-138-5p	XLOC_047983	-0.883083	0.0197053	ENSOCUG00000029328	-0.984108	0.000376837
ocu-miR-138-5p	XLOC_011750	-0.882734	0.0198206	ENSOCUG00000029328	-0.984108	0.000376837
ocu-miR-138-5p	XLOC_072915	-0.881988	0.0200686	ENSOCUG00000029328	-0.984108	0.000376837
ocu-miR-138-5p	XLOC_069541	-0.881938	0.0200852	ENSOCUG00000029328	-0.984108	0.000376837
ocu-miR-138-5p	XLOC_007203	-0.880576	0.0205417	ENSOCUG00000029328	-0.984108	0.000376837
ocu-miR-138-5p	XLOC_035968	-0.880354	0.0206164	ENSOCUG00000029328	-0.984108	0.000376837
ocu-miR-138-5p	XLOC_075791	-0.879089	0.0210455	ENSOCUG00000029328	-0.984108	0.000376837
ocu-miR-138-5p	XLOC_057188	-0.877836	0.0214746	ENSOCUG00000029328	-0.984108	0.000376837
ocu-miR-138-5p	XLOC_060100	-0.877574	0.0215647	ENSOCUG00000029328	-0.984108	0.000376837
ocu-miR-138-5p	XLOC_024816	-0.875754	0.0221967	ENSOCUG00000029328	-0.984108	0.000376837
ocu-miR-138-5p	XLOC_047597	-0.87373	0.0229095	ENSOCUG00000029328	-0.984108	0.000376837
ocu-miR-138-5p	XLOC_008325	-0.870216	0.0241729	ENSOCUG00000029328	-0.984108	0.000376837
ocu-miR-138-5p	XLOC_056593	-0.867058	0.0253354	ENSOCUG00000029328	-0.984108	0.000376837
ocu-miR-138-5p	XLOC_069541	-0.865663	0.0258574	ENSOCUG00000029328	-0.984108	0.000376837
ocu-miR-138-5p	XLOC_053871	-0.865556	0.0258977	ENSOCUG00000029328	-0.984108	0.000376837
ocu-miR-138-5p	XLOC_046127	-0.865047	0.0260895	ENSOCUG00000029328	-0.984108	0.000376837
ocu-miR-138-5p	XLOC_065625	-0.864477	0.0263051	ENSOCUG00000029328	-0.984108	0.000376837
ocu-miR-138-5p	XLOC_000180	-0.863678	0.026609	ENSOCUG00000029328	-0.984108	0.000376837
ocu-miR-138-5p	XLOC_073489	-0.863417	0.0267083	ENSOCUG00000029328	-0.984108	0.000376837
ocu-miR-138-5p	XLOC_010965	-0.863092	0.0268328	ENSOCUG00000029328	-0.984108	0.000376837
ocu-miR-138-5p	XLOC_020385	-0.861269	0.0275342	ENSOCUG00000029328	-0.984108	0.000376837
ocu-miR-138-5p	XLOC_009780	-0.860922	0.0276688	ENSOCUG00000029328	-0.984108	0.000376837
ocu-miR-138-5p	XLOC_063944	-0.859937	0.0280527	ENSOCUG00000029328	-0.984108	0.000376837
ocu-miR-138-5p	XLOC_009780	-0.858173	0.028746	ENSOCUG00000029328	-0.984108	0.000376837
ocu-miR-138-5p	XLOC_012209	-0.858171	0.0287468	ENSOCUG00000029328	-0.984108	0.000376837
ocu-miR-138-5p	XLOC_045973	-0.857785	0.0288996	ENSOCUG00000029328	-0.984108	0.000376837
ocu-miR-138-5p	XLOC_044422	-0.857618	0.0289659	ENSOCUG00000029328	-0.984108	0.000376837
ocu-miR-138-5p	XLOC_024947	-0.857596	0.0289744	ENSOCUG00000029328	-0.984108	0.000376837
ocu-miR-138-5p	XLOC_028491	-0.856203	0.0295298	ENSOCUG00000029328	-0.984108	0.000376837
ocu-miR-138-5p	XLOC_052729	-0.85609	0.0295749	ENSOCUG00000029328	-0.984108	0.000376837
ocu-miR-138-5p	XLOC_040116	-0.855691	0.0297351	ENSOCUG00000029328	-0.984108	0.000376837
ocu-miR-138-5p	XLOC_049906	-0.85548	0.0298198	ENSOCUG00000029328	-0.984108	0.000376837
ocu-miR-138-5p	XLOC_051617	-0.85548	0.02982	ENSOCUG00000029328	-0.984108	0.000376837
ocu-miR-138-5p	XLOC_047862	-0.855355	0.02987	ENSOCUG00000029328	-0.984108	0.000376837
ocu-miR-138-5p	XLOC_061007	-0.855328	0.029881	ENSOCUG00000029328	-0.984108	0.000376837
ocu-miR-138-5p	XLOC_061007	-0.85507	0.0299849	ENSOCUG00000029328	-0.984108	0.000376837
ocu-miR-138-5p	XLOC_066722	-0.854785	0.0301	ENSOCUG00000029328	-0.984108	0.000376837
ocu-miR-138-5p	XLOC_065201	-0.854103	0.0303762	ENSOCUG00000029328	-0.984108	0.000376837
ocu-miR-138-5p	XLOC_069210	-0.854042	0.0304008	ENSOCUG00000029328	-0.984108	0.000376837
ocu-miR-138-5p	XLOC_065201	-0.853888	0.0304635	ENSOCUG00000029328	-0.984108	0.000376837
ocu-miR-138-5p	XLOC_039593	-0.853458	0.0306382	ENSOCUG00000029328	-0.984108	0.000376837
ocu-miR-138-5p	XLOC_073215	-0.85312	0.0307764	ENSOCUG00000029328	-0.984108	0.000376837
ocu-miR-138-5p	XLOC_010965	-0.852913	0.0308608	ENSOCUG00000029328	-0.984108	0.000376837
ocu-miR-138-5p	XLOC_049412	-0.852658	0.0309651	ENSOCUG00000029328	-0.984108	0.000376837
ocu-miR-138-5p	XLOC_009039	-0.852395	0.0310727	ENSOCUG00000029328	-0.984108	0.000376837
ocu-miR-138-5p	XLOC_009976	-0.851703	0.0313575	ENSOCUG00000029328	-0.984108	0.000376837
ocu-miR-138-5p	XLOC_065556	-0.851326	0.0315128	ENSOCUG00000029328	-0.984108	0.000376837
ocu-miR-138-5p	XLOC_027382	-0.850885	0.0316952	ENSOCUG00000029328	-0.984108	0.000376837
ocu-miR-138-5p	XLOC_044422	-0.850542	0.0318374	ENSOCUG00000029328	-0.984108	0.000376837
ocu-miR-138-5p	XLOC_020385	-0.848754	0.0325832	ENSOCUG00000029328	-0.984108	0.000376837
ocu-miR-138-5p	XLOC_022126	-0.84869	0.0326098	ENSOCUG00000029328	-0.984108	0.000376837
ocu-miR-138-5p	XLOC_037195	-0.848622	0.0326384	ENSOCUG00000029328	-0.984108	0.000376837
ocu-miR-138-5p	XLOC_063895	-0.847965	0.032915	ENSOCUG00000029328	-0.984108	0.000376837
ocu-miR-138-5p	XLOC_047983	-0.847943	0.032924	ENSOCUG00000029328	-0.984108	0.000376837
ocu-miR-138-5p	XLOC_022075	-0.847644	0.0330503	ENSOCUG00000029328	-0.984108	0.000376837
ocu-miR-138-5p	XLOC_012300	-0.846576	0.0335027	ENSOCUG00000029328	-0.984108	0.000376837
ocu-miR-138-5p	XLOC_017347	-0.846009	0.0337441	ENSOCUG00000029328	-0.984108	0.000376837
ocu-miR-138-5p	XLOC_008833	-0.843691	0.0347393	ENSOCUG00000029328	-0.984108	0.000376837
ocu-miR-138-5p	XLOC_069960	-0.843249	0.0349307	ENSOCUG00000029328	-0.984108	0.000376837
ocu-miR-138-5p	XLOC_009780	-0.843205	0.0349496	ENSOCUG00000029328	-0.984108	0.000376837
ocu-miR-138-5p	XLOC_076872	-0.842689	0.0351735	ENSOCUG00000029328	-0.984108	0.000376837
ocu-miR-138-5p	XLOC_000601	-0.841721	0.0355957	ENSOCUG00000029328	-0.984108	0.000376837
ocu-miR-138-5p	XLOC_049214	-0.841465	0.0357078	ENSOCUG00000029328	-0.984108	0.000376837
ocu-miR-138-5p	XLOC_049430	-0.84106	0.0358854	ENSOCUG00000029328	-0.984108	0.000376837
ocu-miR-138-5p	XLOC_005858	-0.838919	0.0368309	ENSOCUG00000029328	-0.984108	0.000376837
ocu-miR-138-5p	XLOC_024044	-0.838878	0.0368489	ENSOCUG00000029328	-0.984108	0.000376837
ocu-miR-138-5p	XLOC_028715	-0.836914	0.0377268	ENSOCUG00000029328	-0.984108	0.000376837
ocu-miR-138-5p	XLOC_008320	-0.836755	0.0377983	ENSOCUG00000029328	-0.984108	0.000376837
ocu-miR-138-5p	XLOC_006794	-0.836511	0.0379081	ENSOCUG00000029328	-0.984108	0.000376837
ocu-miR-138-5p	XLOC_020385	-0.836155	0.0380686	ENSOCUG00000029328	-0.984108	0.000376837
ocu-miR-138-5p	XLOC_034235	-0.83604	0.0381205	ENSOCUG00000029328	-0.984108	0.000376837
ocu-miR-138-5p	XLOC_011506	-0.835992	0.038142	ENSOCUG00000029328	-0.984108	0.000376837
ocu-miR-138-5p	XLOC_028715	-0.835074	0.0385578	ENSOCUG00000029328	-0.984108	0.000376837
ocu-miR-138-5p	XLOC_023875	-0.833729	0.0391709	ENSOCUG00000029328	-0.984108	0.000376837
ocu-miR-138-5p	XLOC_036283	-0.83359	0.0392345	ENSOCUG00000029328	-0.984108	0.000376837
ocu-miR-138-5p	XLOC_052982	-0.833483	0.0392831	ENSOCUG00000029328	-0.984108	0.000376837
ocu-miR-138-5p	XLOC_057571	-0.833305	0.039365	ENSOCUG00000029328	-0.984108	0.000376837
ocu-miR-138-5p	XLOC_012300	-0.832996	0.0395065	ENSOCUG00000029328	-0.984108	0.000376837
ocu-miR-138-5p	XLOC_039828	-0.832103	0.0399179	ENSOCUG00000029328	-0.984108	0.000376837
ocu-miR-138-5p	XLOC_061006	-0.832065	0.039935	ENSOCUG00000029328	-0.984108	0.000376837
ocu-miR-138-5p	XLOC_051335	-0.831653	0.0401254	ENSOCUG00000029328	-0.984108	0.000376837
ocu-miR-138-5p	XLOC_010604	-0.829761	0.041005	ENSOCUG00000029328	-0.984108	0.000376837
ocu-miR-138-5p	XLOC_005858	-0.826508	0.0425383	ENSOCUG00000029328	-0.984108	0.000376837
ocu-miR-138-5p	XLOC_056387	-0.82613	0.0427181	ENSOCUG00000029328	-0.984108	0.000376837
ocu-miR-138-5p	XLOC_065428	-0.82605	0.0427563	ENSOCUG00000029328	-0.984108	0.000376837
ocu-miR-138-5p	XLOC_051968	-0.825865	0.0428445	ENSOCUG00000029328	-0.984108	0.000376837
ocu-miR-138-5p	XLOC_028030	-0.825316	0.0431065	ENSOCUG00000029328	-0.984108	0.000376837
ocu-miR-138-5p	XLOC_062893	-0.823643	0.0439103	ENSOCUG00000029328	-0.984108	0.000376837
ocu-miR-138-5p	XLOC_017205	-0.822123	0.0446464	ENSOCUG00000029328	-0.984108	0.000376837
ocu-miR-138-5p	XLOC_015763	-0.820944	0.0452213	ENSOCUG00000029328	-0.984108	0.000376837
ocu-miR-138-5p	XLOC_075851	-0.819716	0.0458238	ENSOCUG00000029328	-0.984108	0.000376837
ocu-miR-138-5p	XLOC_057325	-0.816396	0.0474712	ENSOCUG00000029328	-0.984108	0.000376837
ocu-miR-138-5p	XLOC_056275	-0.813622	0.0488678	ENSOCUG00000029328	-0.984108	0.000376837
ocu-miR-138-5p	XLOC_021856	-0.813121	0.0491222	ENSOCUG00000029328	-0.984108	0.000376837
ocu-miR-138-5p	XLOC_055394	-0.812556	0.0494101	ENSOCUG00000029328	-0.984108	0.000376837
ocu-miR-153-3p	XLOC_052285	-0.910585	0.0116352	ENSOCUG00000001034	-0.983971	0.000383313
ocu-miR-153-3p	XLOC_021459	-0.868624	0.0247559	ENSOCUG00000001034	-0.983971	0.000383313
ocu-miR-153-3p	XLOC_014121	-0.859865	0.0280807	ENSOCUG00000001034	-0.983971	0.000383313
ocu-miR-148b-5p	XLOC_032005	-0.970743	0.00127146	ENSOCUG00000006884	-0.983965	0.000383602
ocu-miR-148b-5p	XLOC_020951	-0.966101	0.00170419	ENSOCUG00000006884	-0.983965	0.000383602
ocu-miR-148b-5p	XLOC_033782	-0.960439	0.00231667	ENSOCUG00000006884	-0.983965	0.000383602
ocu-miR-148b-5p	XLOC_021052	-0.959944	0.00237455	ENSOCUG00000006884	-0.983965	0.000383602
ocu-miR-148b-5p	XLOC_030906	-0.957471	0.00267467	ENSOCUG00000006884	-0.983965	0.000383602
ocu-miR-148b-5p	XLOC_025564	-0.947854	0.00400787	ENSOCUG00000006884	-0.983965	0.000383602
ocu-miR-148b-5p	XLOC_032005	-0.896198	0.0156031	ENSOCUG00000006884	-0.983965	0.000383602
ocu-miR-148b-5p	XLOC_025564	-0.878273	0.0213244	ENSOCUG00000006884	-0.983965	0.000383602
ocu-miR-148b-5p	XLOC_073502	-0.844475	0.0344011	ENSOCUG00000006884	-0.983965	0.000383602
ocu-miR-148b-5p	XLOC_057581	-0.841859	0.0355356	ENSOCUG00000006884	-0.983965	0.000383602
ocu-miR-148b-5p	XLOC_050476	-0.817007	0.0471656	ENSOCUG00000006884	-0.983965	0.000383602
ocu-miR-130b-3p	XLOC_060914	-0.830578	0.0406242	ENSOCUG00000016267	-0.983582	0.000402115
ocu-miR-130b-5p	XLOC_005253	-0.968705	0.00145378	ENSOCUG00000008127	-0.983522	0.000405057
ocu-miR-130b-5p	XLOC_070856	-0.958099	0.00259681	ENSOCUG00000008127	-0.983522	0.000405057
ocu-miR-130b-5p	XLOC_052285	-0.89307	0.0165398	ENSOCUG00000008127	-0.983522	0.000405057
ocu-miR-130b-5p	XLOC_069717	-0.878012	0.0214139	ENSOCUG00000008127	-0.983522	0.000405057
ocu-miR-370-3p	XLOC_062986	-0.925807	0.00805262	ENSOCUG00000029211	-0.983406	0.000410733
ocu-miR-370-3p	XLOC_039036	-0.85243	0.0310585	ENSOCUG00000029211	-0.983406	0.000410733
ocu-miR-370-3p	XLOC_062854	-0.839345	0.0366419	ENSOCUG00000029211	-0.983406	0.000410733
ocu-miR-370-3p	XLOC_069159	-0.837261	0.0375711	ENSOCUG00000029211	-0.983406	0.000410733
ocu-miR-370-3p	XLOC_058744	-0.830545	0.0406395	ENSOCUG00000029211	-0.983406	0.000410733
ocu-miR-370-3p	XLOC_059754	-0.818329	0.0465084	ENSOCUG00000029211	-0.983406	0.000410733
ocu-miR-185-3p	XLOC_066658	-0.928236	0.00754023	ENSOCUG00000015389	-0.983404	0.00041086
ocu-miR-185-3p	XLOC_025346	-0.89677	0.0154347	ENSOCUG00000015389	-0.983404	0.00041086
ocu-miR-185-3p	XLOC_040494	-0.885277	0.0189872	ENSOCUG00000015389	-0.983404	0.00041086
ocu-miR-185-3p	XLOC_015737	-0.875587	0.0222551	ENSOCUG00000015389	-0.983404	0.00041086
ocu-miR-185-3p	XLOC_013910	-0.873362	0.0230402	ENSOCUG00000015389	-0.983404	0.00041086
ocu-miR-185-3p	XLOC_061480	-0.857699	0.0289336	ENSOCUG00000015389	-0.983404	0.00041086
ocu-miR-185-3p	XLOC_040494	-0.816567	0.0473856	ENSOCUG00000015389	-0.983404	0.00041086
ocu-miR-671-5p	XLOC_061480	-0.938204	0.00561008	ENSOCUG00000012320	-0.982993	0.0004314
ocu-miR-671-5p	XLOC_070856	-0.917661	0.00989053	ENSOCUG00000012320	-0.982993	0.0004314
ocu-miR-671-5p	XLOC_047114	-0.852211	0.0311483	ENSOCUG00000012320	-0.982993	0.0004314
ocu-miR-671-5p	XLOC_069717	-0.83249	0.0397392	ENSOCUG00000012320	-0.982993	0.0004314
ocu-let-7f-3p	XLOC_013838	-0.933304	0.00652409	ENSOCUG00000001825	-0.982886	0.000436822
ocu-let-7f-3p	XLOC_061469	-0.931951	0.00678838	ENSOCUG00000001825	-0.982886	0.000436822
ocu-let-7f-3p	XLOC_070856	-0.830591	0.0406181	ENSOCUG00000001825	-0.982886	0.000436822
ocu-miR-760-3p	XLOC_037590	-0.88008	0.0207091	ENSOCUG00000011972	-0.98274	0.000444296
ocu-miR-760-3p	XLOC_052285	-0.845563	0.0339345	ENSOCUG00000011972	-0.98274	0.000444296
ocu-miR-758-3p	XLOC_010346	-0.991438	0.00010966	ENSOCUG00000012640	-0.982412	0.000461273
ocu-miR-758-3p	XLOC_057299	-0.936724	0.00587915	ENSOCUG00000012640	-0.982412	0.000461273
ocu-miR-758-3p	XLOC_047355	-0.923969	0.00845133	ENSOCUG00000012640	-0.982412	0.000461273
ocu-miR-758-3p	XLOC_036134	-0.916287	0.0102185	ENSOCUG00000012640	-0.982412	0.000461273
ocu-miR-758-3p	XLOC_028787	-0.895366	0.0158496	ENSOCUG00000012640	-0.982412	0.000461273
ocu-miR-758-3p	XLOC_001880	-0.883668	0.0195126	ENSOCUG00000012640	-0.982412	0.000461273
ocu-miR-758-3p	XLOC_062997	-0.876574	0.0219109	ENSOCUG00000012640	-0.982412	0.000461273
ocu-miR-758-3p	XLOC_043423	-0.845885	0.033797	ENSOCUG00000012640	-0.982412	0.000461273
ocu-miR-758-3p	XLOC_014980	-0.843186	0.0349581	ENSOCUG00000012640	-0.982412	0.000461273
ocu-miR-758-3p	XLOC_033505	-0.842385	0.0353062	ENSOCUG00000012640	-0.982412	0.000461273
ocu-miR-758-3p	XLOC_061708	-0.841324	0.0357696	ENSOCUG00000012640	-0.982412	0.000461273
ocu-miR-758-3p	XLOC_028715	-0.833487	0.0392813	ENSOCUG00000012640	-0.982412	0.000461273
ocu-miR-758-3p	XLOC_045973	-0.830392	0.0407109	ENSOCUG00000012640	-0.982412	0.000461273
ocu-miR-758-3p	XLOC_004037	-0.830224	0.040789	ENSOCUG00000012640	-0.982412	0.000461273
ocu-miR-758-3p	XLOC_000180	-0.829732	0.0410189	ENSOCUG00000012640	-0.982412	0.000461273
ocu-miR-758-3p	XLOC_024203	-0.826485	0.0425493	ENSOCUG00000012640	-0.982412	0.000461273
ocu-miR-758-3p	XLOC_065024	-0.821173	0.0451093	ENSOCUG00000012640	-0.982412	0.000461273
ocu-miR-758-3p	XLOC_055200	-0.814201	0.0485749	ENSOCUG00000012640	-0.982412	0.000461273
ocu-miR-758-3p	XLOC_015839	-0.812001	0.0496933	ENSOCUG00000012640	-0.982412	0.000461273
ocu-miR-185-5p	XLOC_034223	-0.904242	0.0133152	ENSOCUG00000014370	-0.98228	0.000468203
ocu-miR-185-5p	XLOC_035023	-0.90363	0.0134832	ENSOCUG00000014370	-0.98228	0.000468203
ocu-miR-185-5p	XLOC_010627	-0.88118	0.0203387	ENSOCUG00000014370	-0.98228	0.000468203
ocu-miR-185-5p	XLOC_062719	-0.879786	0.0208086	ENSOCUG00000014370	-0.98228	0.000468203
ocu-miR-185-5p	XLOC_013716	-0.872101	0.0234912	ENSOCUG00000014370	-0.98228	0.000468203
ocu-miR-185-5p	XLOC_063297	-0.840278	0.0362294	ENSOCUG00000014370	-0.98228	0.000468203
ocu-miR-185-5p	XLOC_048607	-0.838396	0.0370634	ENSOCUG00000014370	-0.98228	0.000468203
ocu-miR-185-5p	XLOC_061493	-0.825854	0.0428496	ENSOCUG00000014370	-0.98228	0.000468203
ocu-miR-185-5p	XLOC_010497	-0.822809	0.0443132	ENSOCUG00000014370	-0.98228	0.000468203
ocu-miR-491-5p	XLOC_007521	-0.932556	0.00666969	ENSOCUG00000004837	-0.982262	0.000469182
ocu-miR-491-5p	XLOC_074487	-0.918783	0.00962634	ENSOCUG00000004837	-0.982262	0.000469182
ocu-miR-491-5p	XLOC_061469	-0.874571	0.0226118	ENSOCUG00000004837	-0.982262	0.000469182
ocu-miR-491-5p	XLOC_015331	-0.831888	0.0400168	ENSOCUG00000004837	-0.982262	0.000469182
ocu-miR-491-5p	XLOC_072277	-0.81837	0.0464883	ENSOCUG00000004837	-0.982262	0.000469182
ocu-miR-29c-3p	XLOC_049008	-0.832753	0.0396184	ENSOCUG00000011742	-0.982239	0.000470404
ocu-miR-491-5p	XLOC_007521	-0.932556	0.00666969	ENSOCUG00000011808	-0.982111	0.000477169
ocu-miR-491-5p	XLOC_074487	-0.918783	0.00962634	ENSOCUG00000011808	-0.982111	0.000477169
ocu-miR-491-5p	XLOC_061469	-0.874571	0.0226118	ENSOCUG00000011808	-0.982111	0.000477169
ocu-miR-491-5p	XLOC_015331	-0.831888	0.0400168	ENSOCUG00000011808	-0.982111	0.000477169
ocu-miR-491-5p	XLOC_072277	-0.81837	0.0464883	ENSOCUG00000011808	-0.982111	0.000477169
ocu-miR-15b-5p	XLOC_069717	-0.898085	0.0150508	ENSOCUG00000012633	-0.98205	0.000480395
ocu-miR-15b-5p	XLOC_037590	-0.875827	0.0221709	ENSOCUG00000012633	-0.98205	0.000480395
ocu-miR-15b-5p	XLOC_048321	-0.86484	0.0261679	ENSOCUG00000012633	-0.98205	0.000480395
ocu-miR-15b-5p	XLOC_052285	-0.864066	0.026461	ENSOCUG00000012633	-0.98205	0.000480395
ocu-miR-15b-5p	XLOC_060914	-0.83529	0.03846	ENSOCUG00000012633	-0.98205	0.000480395
ocu-miR-15b-5p	XLOC_061480	-0.823632	0.0439157	ENSOCUG00000012633	-0.98205	0.000480395
ocu-miR-93-5p	XLOC_005253	-0.928257	0.00753598	ENSOCUG00000016936	-0.981322	0.000520054
ocu-miR-93-5p	XLOC_069717	-0.926957	0.00780804	ENSOCUG00000016936	-0.981322	0.000520054
ocu-miR-93-5p	XLOC_061480	-0.862262	0.0271509	ENSOCUG00000016936	-0.981322	0.000520054
ocu-miR-93-5p	XLOC_053429	-0.845714	0.0338701	ENSOCUG00000016936	-0.981322	0.000520054
ocu-miR-18a-3p	XLOC_069717	-0.864407	0.0263318	ENSOCUG00000003217	-0.981267	0.000523105
ocu-miR-18a-3p	XLOC_013482	-0.863771	0.0265734	ENSOCUG00000003217	-0.981267	0.000523105
ocu-miR-18a-3p	XLOC_071077	-0.811591	0.0499031	ENSOCUG00000003217	-0.981267	0.000523105
ocu-miR-138-3p	XLOC_009606	-0.985829	0.000299804	ENSOCUG00000014994	-0.98103	0.000536358
ocu-miR-138-3p	XLOC_063387	-0.974519	0.000965628	ENSOCUG00000014994	-0.98103	0.000536358
ocu-miR-138-3p	XLOC_072383	-0.965475	0.00176735	ENSOCUG00000014994	-0.98103	0.000536358
ocu-miR-138-3p	XLOC_061708	-0.964454	0.00187279	ENSOCUG00000014994	-0.98103	0.000536358
ocu-miR-138-3p	XLOC_066722	-0.959324	0.00244811	ENSOCUG00000014994	-0.98103	0.000536358
ocu-miR-138-3p	XLOC_048275	-0.953616	0.00317725	ENSOCUG00000014994	-0.98103	0.000536358
ocu-miR-138-3p	XLOC_024127	-0.951405	0.00348479	ENSOCUG00000014994	-0.98103	0.000536358
ocu-miR-138-3p	XLOC_006130	-0.947694	0.00403239	ENSOCUG00000014994	-0.98103	0.000536358
ocu-miR-138-3p	XLOC_013862	-0.939778	0.0053309	ENSOCUG00000014994	-0.98103	0.000536358
ocu-miR-138-3p	XLOC_044210	-0.935304	0.00614288	ENSOCUG00000014994	-0.98103	0.000536358
ocu-miR-138-3p	XLOC_014980	-0.932314	0.00671701	ENSOCUG00000014994	-0.98103	0.000536358
ocu-miR-138-3p	XLOC_014687	-0.930522	0.00707314	ENSOCUG00000014994	-0.98103	0.000536358
ocu-miR-138-3p	XLOC_014213	-0.929625	0.00725474	ENSOCUG00000014994	-0.98103	0.000536358
ocu-miR-138-3p	XLOC_050476	-0.928359	0.00751471	ENSOCUG00000014994	-0.98103	0.000536358
ocu-miR-138-3p	XLOC_008833	-0.925373	0.00814608	ENSOCUG00000014994	-0.98103	0.000536358
ocu-miR-138-3p	XLOC_034235	-0.92428	0.00838315	ENSOCUG00000014994	-0.98103	0.000536358
ocu-miR-138-3p	XLOC_062893	-0.918006	0.00980879	ENSOCUG00000014994	-0.98103	0.000536358
ocu-miR-138-3p	XLOC_076872	-0.916144	0.0102529	ENSOCUG00000014994	-0.98103	0.000536358
ocu-miR-138-3p	XLOC_029150	-0.910275	0.0117147	ENSOCUG00000014994	-0.98103	0.000536358
ocu-miR-138-3p	XLOC_076872	-0.907214	0.0125144	ENSOCUG00000014994	-0.98103	0.000536358
ocu-miR-138-3p	XLOC_023883	-0.906422	0.0127256	ENSOCUG00000014994	-0.98103	0.000536358
ocu-miR-138-3p	XLOC_028787	-0.897184	0.0153133	ENSOCUG00000014994	-0.98103	0.000536358
ocu-miR-138-3p	XLOC_053520	-0.887697	0.0182097	ENSOCUG00000014994	-0.98103	0.000536358
ocu-miR-138-3p	XLOC_024312	-0.885822	0.0188106	ENSOCUG00000014994	-0.98103	0.000536358
ocu-miR-138-3p	XLOC_069760	-0.884257	0.0193194	ENSOCUG00000014994	-0.98103	0.000536358
ocu-miR-138-3p	XLOC_052982	-0.872912	0.0232008	ENSOCUG00000014994	-0.98103	0.000536358
ocu-miR-138-3p	XLOC_062997	-0.86991	0.0242842	ENSOCUG00000014994	-0.98103	0.000536358
ocu-miR-138-3p	XLOC_022135	-0.860314	0.0279055	ENSOCUG00000014994	-0.98103	0.000536358
ocu-miR-138-3p	XLOC_067311	-0.856013	0.0296056	ENSOCUG00000014994	-0.98103	0.000536358
ocu-miR-138-3p	XLOC_057299	-0.851111	0.0316016	ENSOCUG00000014994	-0.98103	0.000536358
ocu-miR-138-3p	XLOC_071960	-0.839175	0.036717	ENSOCUG00000014994	-0.98103	0.000536358
ocu-miR-138-3p	XLOC_039075	-0.829173	0.0412804	ENSOCUG00000014994	-0.98103	0.000536358
ocu-miR-138-3p	XLOC_066888	-0.826008	0.0427763	ENSOCUG00000014994	-0.98103	0.000536358
ocu-miR-138-3p	XLOC_033505	-0.822463	0.0444813	ENSOCUG00000014994	-0.98103	0.000536358
ocu-miR-138-3p	XLOC_019793	-0.82194	0.0447352	ENSOCUG00000014994	-0.98103	0.000536358
ocu-miR-138-3p	XLOC_028715	-0.82097	0.0452087	ENSOCUG00000014994	-0.98103	0.000536358
ocu-miR-138-3p	XLOC_058523	-0.81697	0.0471845	ENSOCUG00000014994	-0.98103	0.000536358
ocu-miR-138-3p	XLOC_031456	-0.814065	0.0486438	ENSOCUG00000014994	-0.98103	0.000536358
ocu-miR-138-3p	XLOC_070876	-0.813508	0.048926	ENSOCUG00000014994	-0.98103	0.000536358
ocu-miR-138-3p	XLOC_022364	-0.812981	0.0491936	ENSOCUG00000014994	-0.98103	0.000536358
ocu-miR-185-3p	XLOC_066658	-0.928236	0.00754023	ENSOCUG00000023917	-0.981005	0.000537778
ocu-miR-185-3p	XLOC_025346	-0.89677	0.0154347	ENSOCUG00000023917	-0.981005	0.000537778
ocu-miR-185-3p	XLOC_040494	-0.885277	0.0189872	ENSOCUG00000023917	-0.981005	0.000537778
ocu-miR-185-3p	XLOC_015737	-0.875587	0.0222551	ENSOCUG00000023917	-0.981005	0.000537778
ocu-miR-185-3p	XLOC_013910	-0.873362	0.0230402	ENSOCUG00000023917	-0.981005	0.000537778
ocu-miR-185-3p	XLOC_061480	-0.857699	0.0289336	ENSOCUG00000023917	-0.981005	0.000537778
ocu-miR-185-3p	XLOC_040494	-0.816567	0.0473856	ENSOCUG00000023917	-0.981005	0.000537778
ocu-miR-30b-3p	XLOC_055203	-0.938202	0.00561055	ENSOCUG00000002522	-0.980997	0.000538257
ocu-miR-30b-3p	XLOC_052285	-0.874334	0.0226956	ENSOCUG00000002522	-0.980997	0.000538257
ocu-miR-30b-3p	XLOC_069717	-0.827383	0.0421231	ENSOCUG00000002522	-0.980997	0.000538257
ocu-miR-30b-3p	XLOC_021052	-0.814619	0.0483639	ENSOCUG00000002522	-0.980997	0.000538257
ocu-miR-182-5p	XLOC_073045	-0.846384	0.0335844	ENSOCUG00000000638	-0.980994	0.000538427
ocu-miR-182-5p	XLOC_068665	-0.846243	0.0336444	ENSOCUG00000000638	-0.980994	0.000538427
ocu-miR-182-5p	XLOC_043669	-0.813899	0.0487277	ENSOCUG00000000638	-0.980994	0.000538427
ocu-miR-93-5p	XLOC_005253	-0.928257	0.00753598	ENSOCUG00000007211	-0.980716	0.000554217
ocu-miR-93-5p	XLOC_069717	-0.926957	0.00780804	ENSOCUG00000007211	-0.980716	0.000554217
ocu-miR-93-5p	XLOC_061480	-0.862262	0.0271509	ENSOCUG00000007211	-0.980716	0.000554217
ocu-miR-93-5p	XLOC_053429	-0.845714	0.0338701	ENSOCUG00000007211	-0.980716	0.000554217
novel_152	XLOC_072277	-0.897753	0.0151473	ENSOCUG00000013466	-0.980643	0.000558439
novel_152	XLOC_013482	-0.857989	0.0288188	ENSOCUG00000013466	-0.980643	0.000558439
ocu-miR-3059-5p	XLOC_060135	-0.834366	0.03888	ENSOCUG00000013072	-0.980472	0.000568273
ocu-miR-20a-5p	XLOC_005253	-0.956391	0.00281116	ENSOCUG00000008127	-0.980375	0.000573912
ocu-miR-20a-5p	XLOC_069717	-0.883813	0.0194648	ENSOCUG00000008127	-0.980375	0.000573912
ocu-miR-20a-5p	XLOC_055203	-0.858516	0.0286103	ENSOCUG00000008127	-0.980375	0.000573912
ocu-miR-20a-5p	XLOC_053429	-0.846051	0.0337263	ENSOCUG00000008127	-0.980375	0.000573912
novel_152	XLOC_072277	-0.897753	0.0151473	ENSOCUG00000016925	-0.980256	0.000580904
novel_152	XLOC_013482	-0.857989	0.0288188	ENSOCUG00000016925	-0.980256	0.000580904
ocu-miR-153-3p	XLOC_052285	-0.910585	0.0116352	ENSOCUG00000005958	-0.980112	0.00058934
ocu-miR-153-3p	XLOC_021459	-0.868624	0.0247559	ENSOCUG00000005958	-0.980112	0.00058934
ocu-miR-153-3p	XLOC_014121	-0.859865	0.0280807	ENSOCUG00000005958	-0.980112	0.00058934
ocu-miR-146b-3p	XLOC_070856	-0.953833	0.00314789	ENSOCUG00000027387	-0.9801	0.000590055
ocu-miR-146b-3p	XLOC_061480	-0.921357	0.00903394	ENSOCUG00000027387	-0.9801	0.000590055
ocu-miR-146b-3p	XLOC_005253	-0.903626	0.0134845	ENSOCUG00000027387	-0.9801	0.000590055
ocu-miR-146b-3p	XLOC_069717	-0.884073	0.0193796	ENSOCUG00000027387	-0.9801	0.000590055
ocu-miR-146b-3p	XLOC_074984	-0.878152	0.0213658	ENSOCUG00000027387	-0.9801	0.000590055
ocu-miR-146b-3p	XLOC_061469	-0.857372	0.0290635	ENSOCUG00000027387	-0.9801	0.000590055
ocu-miR-146b-3p	XLOC_013716	-0.857312	0.0290871	ENSOCUG00000027387	-0.9801	0.000590055
ocu-miR-146b-3p	XLOC_074487	-0.821036	0.0451762	ENSOCUG00000027387	-0.9801	0.000590055
ocu-miR-146b-3p	XLOC_077469	-0.813776	0.0487901	ENSOCUG00000027387	-0.9801	0.000590055
ocu-miR-452-5p	XLOC_006635	-0.947799	0.00401627	ENSOCUG00000007979	-0.980096	0.000590322
ocu-miR-452-5p	XLOC_009780	-0.93166	0.00684589	ENSOCUG00000007979	-0.980096	0.000590322
ocu-miR-452-5p	XLOC_021856	-0.929046	0.00737304	ENSOCUG00000007979	-0.980096	0.000590322
ocu-miR-452-5p	XLOC_043244	-0.92865	0.0074547	ENSOCUG00000007979	-0.980096	0.000590322
ocu-miR-452-5p	XLOC_073374	-0.921147	0.00908164	ENSOCUG00000007979	-0.980096	0.000590322
ocu-miR-452-5p	XLOC_051904	-0.916691	0.0101215	ENSOCUG00000007979	-0.980096	0.000590322
ocu-miR-452-5p	XLOC_065311	-0.916623	0.0101377	ENSOCUG00000007979	-0.980096	0.000590322
ocu-miR-452-5p	XLOC_001389	-0.915868	0.0103194	ENSOCUG00000007979	-0.980096	0.000590322
ocu-miR-452-5p	XLOC_071014	-0.914692	0.0106058	ENSOCUG00000007979	-0.980096	0.000590322
ocu-miR-452-5p	XLOC_037129	-0.913867	0.0108088	ENSOCUG00000007979	-0.980096	0.000590322
ocu-miR-452-5p	XLOC_021929	-0.912998	0.0110247	ENSOCUG00000007979	-0.980096	0.000590322
ocu-miR-452-5p	XLOC_040461	-0.910543	0.0116459	ENSOCUG00000007979	-0.980096	0.000590322
ocu-miR-452-5p	XLOC_027971	-0.910418	0.011678	ENSOCUG00000007979	-0.980096	0.000590322
ocu-miR-452-5p	XLOC_011506	-0.910399	0.0116829	ENSOCUG00000007979	-0.980096	0.000590322
ocu-miR-452-5p	XLOC_073996	-0.910149	0.011747	ENSOCUG00000007979	-0.980096	0.000590322
ocu-miR-452-5p	XLOC_062964	-0.90958	0.011894	ENSOCUG00000007979	-0.980096	0.000590322
ocu-miR-452-5p	XLOC_049214	-0.90804	0.0122962	ENSOCUG00000007979	-0.980096	0.000590322
ocu-miR-452-5p	XLOC_010558	-0.907689	0.0123886	ENSOCUG00000007979	-0.980096	0.000590322
ocu-miR-452-5p	XLOC_064790	-0.907349	0.0124785	ENSOCUG00000007979	-0.980096	0.000590322
ocu-miR-452-5p	XLOC_004699	-0.906619	0.012673	ENSOCUG00000007979	-0.980096	0.000590322
ocu-miR-452-5p	XLOC_007967	-0.906544	0.012693	ENSOCUG00000007979	-0.980096	0.000590322
ocu-miR-452-5p	XLOC_039148	-0.905971	0.0128464	ENSOCUG00000007979	-0.980096	0.000590322
ocu-miR-452-5p	XLOC_073374	-0.904927	0.0131286	ENSOCUG00000007979	-0.980096	0.000590322
ocu-miR-452-5p	XLOC_015763	-0.904368	0.0132808	ENSOCUG00000007979	-0.980096	0.000590322
ocu-miR-452-5p	XLOC_038015	-0.904293	0.0133013	ENSOCUG00000007979	-0.980096	0.000590322
ocu-miR-452-5p	XLOC_022075	-0.904151	0.0133403	ENSOCUG00000007979	-0.980096	0.000590322
ocu-miR-452-5p	XLOC_005676	-0.903235	0.0135921	ENSOCUG00000007979	-0.980096	0.000590322
ocu-miR-452-5p	XLOC_049412	-0.902696	0.0137413	ENSOCUG00000007979	-0.980096	0.000590322
ocu-miR-452-5p	XLOC_000601	-0.900332	0.0144056	ENSOCUG00000007979	-0.980096	0.000590322
ocu-miR-452-5p	XLOC_047731	-0.897755	0.0151467	ENSOCUG00000007979	-0.980096	0.000590322
ocu-miR-452-5p	XLOC_045381	-0.896875	0.0154037	ENSOCUG00000007979	-0.980096	0.000590322
ocu-miR-452-5p	XLOC_019660	-0.89686	0.0154083	ENSOCUG00000007979	-0.980096	0.000590322
ocu-miR-452-5p	XLOC_025091	-0.895594	0.0157818	ENSOCUG00000007979	-0.980096	0.000590322
ocu-miR-452-5p	XLOC_035367	-0.895567	0.0157898	ENSOCUG00000007979	-0.980096	0.000590322
ocu-miR-452-5p	XLOC_009976	-0.895376	0.0158467	ENSOCUG00000007979	-0.980096	0.000590322
ocu-miR-452-5p	XLOC_024947	-0.895201	0.0158988	ENSOCUG00000007979	-0.980096	0.000590322
ocu-miR-452-5p	XLOC_012165	-0.894303	0.0161675	ENSOCUG00000007979	-0.980096	0.000590322
ocu-miR-452-5p	XLOC_052220	-0.890435	0.0173492	ENSOCUG00000007979	-0.980096	0.000590322
ocu-miR-452-5p	XLOC_044422	-0.8855	0.0189148	ENSOCUG00000007979	-0.980096	0.000590322
ocu-miR-452-5p	XLOC_053607	-0.885319	0.0189734	ENSOCUG00000007979	-0.980096	0.000590322
ocu-miR-452-5p	XLOC_038877	-0.885105	0.0190428	ENSOCUG00000007979	-0.980096	0.000590322
ocu-miR-452-5p	XLOC_061012	-0.883226	0.0196582	ENSOCUG00000007979	-0.980096	0.000590322
ocu-miR-452-5p	XLOC_057299	-0.88268	0.0198385	ENSOCUG00000007979	-0.980096	0.000590322
ocu-miR-452-5p	XLOC_069541	-0.882263	0.0199771	ENSOCUG00000007979	-0.980096	0.000590322
ocu-miR-452-5p	XLOC_047597	-0.880409	0.0205978	ENSOCUG00000007979	-0.980096	0.000590322
ocu-miR-452-5p	XLOC_072493	-0.87963	0.0208615	ENSOCUG00000007979	-0.980096	0.000590322
ocu-miR-452-5p	XLOC_048617	-0.878241	0.0213352	ENSOCUG00000007979	-0.980096	0.000590322
ocu-miR-452-5p	XLOC_009780	-0.876846	0.0218164	ENSOCUG00000007979	-0.980096	0.000590322
ocu-miR-452-5p	XLOC_062791	-0.876297	0.0220071	ENSOCUG00000007979	-0.980096	0.000590322
ocu-miR-452-5p	XLOC_041177	-0.874393	0.0226749	ENSOCUG00000007979	-0.980096	0.000590322
ocu-miR-452-5p	XLOC_010536	-0.873139	0.0231199	ENSOCUG00000007979	-0.980096	0.000590322
ocu-miR-452-5p	XLOC_001579	-0.872471	0.0233584	ENSOCUG00000007979	-0.980096	0.000590322
ocu-miR-452-5p	XLOC_058059	-0.872187	0.0234602	ENSOCUG00000007979	-0.980096	0.000590322
ocu-miR-452-5p	XLOC_006697	-0.871147	0.0238348	ENSOCUG00000007979	-0.980096	0.000590322
ocu-miR-452-5p	XLOC_010604	-0.870811	0.0239565	ENSOCUG00000007979	-0.980096	0.000590322
ocu-miR-452-5p	XLOC_076929	-0.870639	0.0240192	ENSOCUG00000007979	-0.980096	0.000590322
ocu-miR-452-5p	XLOC_048618	-0.870484	0.0240752	ENSOCUG00000007979	-0.980096	0.000590322
ocu-miR-452-5p	XLOC_071141	-0.869801	0.024324	ENSOCUG00000007979	-0.980096	0.000590322
ocu-miR-452-5p	XLOC_011751	-0.868799	0.0246914	ENSOCUG00000007979	-0.980096	0.000590322
ocu-miR-452-5p	XLOC_008325	-0.86796	0.0250008	ENSOCUG00000007979	-0.980096	0.000590322
ocu-miR-452-5p	XLOC_001389	-0.867498	0.0251719	ENSOCUG00000007979	-0.980096	0.000590322
ocu-miR-452-5p	XLOC_003345	-0.865234	0.0260189	ENSOCUG00000007979	-0.980096	0.000590322
ocu-miR-452-5p	XLOC_071014	-0.863461	0.0266917	ENSOCUG00000007979	-0.980096	0.000590322
ocu-miR-452-5p	XLOC_037129	-0.863452	0.026695	ENSOCUG00000007979	-0.980096	0.000590322
ocu-miR-452-5p	XLOC_061007	-0.863263	0.0267671	ENSOCUG00000007979	-0.980096	0.000590322
ocu-miR-452-5p	XLOC_031578	-0.863165	0.0268047	ENSOCUG00000007979	-0.980096	0.000590322
ocu-miR-452-5p	XLOC_034393	-0.863165	0.0268047	ENSOCUG00000007979	-0.980096	0.000590322
ocu-miR-452-5p	XLOC_065151	-0.863165	0.0268047	ENSOCUG00000007979	-0.980096	0.000590322
ocu-miR-452-5p	XLOC_027227	-0.862928	0.0268955	ENSOCUG00000007979	-0.980096	0.000590322
ocu-miR-452-5p	XLOC_010604	-0.861232	0.0275489	ENSOCUG00000007979	-0.980096	0.000590322
ocu-miR-452-5p	XLOC_061007	-0.860997	0.0276397	ENSOCUG00000007979	-0.980096	0.000590322
ocu-miR-452-5p	XLOC_024044	-0.859713	0.0281402	ENSOCUG00000007979	-0.980096	0.000590322
ocu-miR-452-5p	XLOC_062997	-0.859205	0.0283394	ENSOCUG00000007979	-0.980096	0.000590322
ocu-miR-452-5p	XLOC_024482	-0.858765	0.0285124	ENSOCUG00000007979	-0.980096	0.000590322
ocu-miR-452-5p	XLOC_028525	-0.858541	0.0286005	ENSOCUG00000007979	-0.980096	0.000590322
ocu-miR-452-5p	XLOC_035834	-0.85767	0.0289451	ENSOCUG00000007979	-0.980096	0.000590322
ocu-miR-452-5p	XLOC_044422	-0.855145	0.0299548	ENSOCUG00000007979	-0.980096	0.000590322
ocu-miR-452-5p	XLOC_008852	-0.855039	0.0299975	ENSOCUG00000007979	-0.980096	0.000590322
ocu-miR-452-5p	XLOC_034890	-0.854403	0.0302544	ENSOCUG00000007979	-0.980096	0.000590322
ocu-miR-452-5p	XLOC_056275	-0.853603	0.0305795	ENSOCUG00000007979	-0.980096	0.000590322
ocu-miR-452-5p	XLOC_063949	-0.853113	0.0307791	ENSOCUG00000007979	-0.980096	0.000590322
ocu-miR-452-5p	XLOC_073215	-0.852249	0.0311328	ENSOCUG00000007979	-0.980096	0.000590322
ocu-miR-452-5p	XLOC_039641	-0.848936	0.0325068	ENSOCUG00000007979	-0.980096	0.000590322
ocu-miR-452-5p	XLOC_020914	-0.848268	0.0327872	ENSOCUG00000007979	-0.980096	0.000590322
ocu-miR-452-5p	XLOC_039828	-0.847973	0.0329116	ENSOCUG00000007979	-0.980096	0.000590322
ocu-miR-452-5p	XLOC_056563	-0.84769	0.0330308	ENSOCUG00000007979	-0.980096	0.000590322
ocu-miR-452-5p	XLOC_057239	-0.847149	0.0332596	ENSOCUG00000007979	-0.980096	0.000590322
ocu-miR-452-5p	XLOC_014213	-0.844596	0.034349	ENSOCUG00000007979	-0.980096	0.000590322
ocu-miR-452-5p	XLOC_065625	-0.843774	0.0347034	ENSOCUG00000007979	-0.980096	0.000590322
ocu-miR-452-5p	XLOC_031921	-0.839601	0.0365282	ENSOCUG00000007979	-0.980096	0.000590322
ocu-miR-452-5p	XLOC_063747	-0.838327	0.0370944	ENSOCUG00000007979	-0.980096	0.000590322
ocu-miR-452-5p	XLOC_069541	-0.835599	0.0383198	ENSOCUG00000007979	-0.980096	0.000590322
ocu-miR-452-5p	XLOC_069541	-0.833282	0.0393755	ENSOCUG00000007979	-0.980096	0.000590322
ocu-miR-452-5p	XLOC_010607	-0.827885	0.0418858	ENSOCUG00000007979	-0.980096	0.000590322
ocu-miR-452-5p	XLOC_047577	-0.827531	0.042053	ENSOCUG00000007979	-0.980096	0.000590322
ocu-miR-452-5p	XLOC_062893	-0.818915	0.0462188	ENSOCUG00000007979	-0.980096	0.000590322
ocu-miR-452-5p	XLOC_028030	-0.818534	0.0464069	ENSOCUG00000007979	-0.980096	0.000590322
ocu-miR-452-5p	XLOC_013546	-0.811441	0.0499799	ENSOCUG00000007979	-0.980096	0.000590322
ocu-miR-7a-5p	XLOC_061657	-0.907691	0.0123882	ENSOCUG00000013996	-0.979851	0.000604861
ocu-miR-7a-5p	XLOC_013716	-0.897001	0.0153669	ENSOCUG00000013996	-0.979851	0.000604861
ocu-miR-7a-5p	XLOC_077052	-0.886539	0.0185799	ENSOCUG00000013996	-0.979851	0.000604861
ocu-miR-7a-5p	XLOC_071193	-0.875934	0.0221338	ENSOCUG00000013996	-0.979851	0.000604861
ocu-miR-7a-5p	XLOC_069717	-0.868004	0.0249845	ENSOCUG00000013996	-0.979851	0.000604861
ocu-miR-7a-5p	XLOC_040494	-0.860638	0.0277792	ENSOCUG00000013996	-0.979851	0.000604861
ocu-miR-7a-5p	XLOC_006528	-0.849621	0.0322206	ENSOCUG00000013996	-0.979851	0.000604861
ocu-miR-7a-5p	XLOC_060914	-0.847809	0.0329807	ENSOCUG00000013996	-0.979851	0.000604861
ocu-miR-7a-5p	XLOC_048607	-0.847796	0.032986	ENSOCUG00000013996	-0.979851	0.000604861
ocu-miR-7a-5p	XLOC_072331	-0.839228	0.0366937	ENSOCUG00000013996	-0.979851	0.000604861
ocu-miR-7a-5p	XLOC_015155	-0.835554	0.0383401	ENSOCUG00000013996	-0.979851	0.000604861
ocu-miR-7a-5p	XLOC_054413	-0.829853	0.040962	ENSOCUG00000013996	-0.979851	0.000604861
ocu-miR-7a-5p	XLOC_054118	-0.826394	0.0425923	ENSOCUG00000013996	-0.979851	0.000604861
ocu-miR-7a-5p	XLOC_035023	-0.825393	0.0430696	ENSOCUG00000013996	-0.979851	0.000604861
ocu-miR-7a-5p	XLOC_047868	-0.819002	0.0461756	ENSOCUG00000013996	-0.979851	0.000604861
ocu-miR-7a-5p	XLOC_007209	-0.817562	0.0468892	ENSOCUG00000013996	-0.979851	0.000604861
ocu-miR-17-3p	XLOC_055875	-0.990094	0.00014671	ENSOCUG00000003098	-0.979822	0.000606633
ocu-miR-17-3p	XLOC_027918	-0.956178	0.00283846	ENSOCUG00000003098	-0.979822	0.000606633
ocu-miR-17-3p	XLOC_068118	-0.942797	0.0048147	ENSOCUG00000003098	-0.979822	0.000606633
ocu-miR-17-3p	XLOC_069717	-0.931169	0.00694345	ENSOCUG00000003098	-0.979822	0.000606633
ocu-miR-17-3p	XLOC_077052	-0.907004	0.0125701	ENSOCUG00000003098	-0.979822	0.000606633
ocu-miR-17-3p	XLOC_070856	-0.90353	0.0135107	ENSOCUG00000003098	-0.979822	0.000606633
ocu-miR-17-3p	XLOC_072277	-0.892917	0.0165861	ENSOCUG00000003098	-0.979822	0.000606633
ocu-miR-17-3p	XLOC_013838	-0.872295	0.0234216	ENSOCUG00000003098	-0.979822	0.000606633
ocu-miR-17-3p	XLOC_015150	-0.856918	0.029244	ENSOCUG00000003098	-0.979822	0.000606633
ocu-miR-17-3p	XLOC_013786	-0.84656	0.0335095	ENSOCUG00000003098	-0.979822	0.000606633
ocu-miR-17-3p	XLOC_009948	-0.82133	0.0450327	ENSOCUG00000003098	-0.979822	0.000606633
ocu-miR-17-3p	XLOC_074522	-0.819535	0.045913	ENSOCUG00000003098	-0.979822	0.000606633
ocu-miR-17-3p	XLOC_061480	-0.818724	0.046313	ENSOCUG00000003098	-0.979822	0.000606633
ocu-miR-370-3p	XLOC_062986	-0.925807	0.00805262	ENSOCUG00000027132	-0.979726	0.000612368
ocu-miR-370-3p	XLOC_039036	-0.85243	0.0310585	ENSOCUG00000027132	-0.979726	0.000612368
ocu-miR-370-3p	XLOC_062854	-0.839345	0.0366419	ENSOCUG00000027132	-0.979726	0.000612368
ocu-miR-370-3p	XLOC_069159	-0.837261	0.0375711	ENSOCUG00000027132	-0.979726	0.000612368
ocu-miR-370-3p	XLOC_058744	-0.830545	0.0406395	ENSOCUG00000027132	-0.979726	0.000612368
ocu-miR-370-3p	XLOC_059754	-0.818329	0.0465084	ENSOCUG00000027132	-0.979726	0.000612368
ocu-miR-185-3p	XLOC_066658	-0.928236	0.00754023	ENSOCUG00000015837	-0.979674	0.000615502
ocu-miR-185-3p	XLOC_025346	-0.89677	0.0154347	ENSOCUG00000015837	-0.979674	0.000615502
ocu-miR-185-3p	XLOC_040494	-0.885277	0.0189872	ENSOCUG00000015837	-0.979674	0.000615502
ocu-miR-185-3p	XLOC_015737	-0.875587	0.0222551	ENSOCUG00000015837	-0.979674	0.000615502
ocu-miR-185-3p	XLOC_013910	-0.873362	0.0230402	ENSOCUG00000015837	-0.979674	0.000615502
ocu-miR-185-3p	XLOC_061480	-0.857699	0.0289336	ENSOCUG00000015837	-0.979674	0.000615502
ocu-miR-185-3p	XLOC_040494	-0.816567	0.0473856	ENSOCUG00000015837	-0.979674	0.000615502
ocu-miR-1343-3p	XLOC_004142	-0.951923	0.00341155	ENSOCUG00000005669	-0.979187	0.000645285
ocu-miR-1343-3p	XLOC_016764	-0.859781	0.0281135	ENSOCUG00000005669	-0.979187	0.000645285
ocu-miR-1343-3p	XLOC_065343	-0.857667	0.0289462	ENSOCUG00000005669	-0.979187	0.000645285
ocu-miR-1343-3p	XLOC_073875	-0.855536	0.0297972	ENSOCUG00000005669	-0.979187	0.000645285
ocu-miR-17-3p	XLOC_055875	-0.990094	0.00014671	ENSOCUG00000000097	-0.979145	0.000647885
ocu-miR-17-3p	XLOC_027918	-0.956178	0.00283846	ENSOCUG00000000097	-0.979145	0.000647885
ocu-miR-17-3p	XLOC_068118	-0.942797	0.0048147	ENSOCUG00000000097	-0.979145	0.000647885
ocu-miR-17-3p	XLOC_069717	-0.931169	0.00694345	ENSOCUG00000000097	-0.979145	0.000647885
ocu-miR-17-3p	XLOC_077052	-0.907004	0.0125701	ENSOCUG00000000097	-0.979145	0.000647885
ocu-miR-17-3p	XLOC_070856	-0.90353	0.0135107	ENSOCUG00000000097	-0.979145	0.000647885
ocu-miR-17-3p	XLOC_072277	-0.892917	0.0165861	ENSOCUG00000000097	-0.979145	0.000647885
ocu-miR-17-3p	XLOC_013838	-0.872295	0.0234216	ENSOCUG00000000097	-0.979145	0.000647885
ocu-miR-17-3p	XLOC_015150	-0.856918	0.029244	ENSOCUG00000000097	-0.979145	0.000647885
ocu-miR-17-3p	XLOC_013786	-0.84656	0.0335095	ENSOCUG00000000097	-0.979145	0.000647885
ocu-miR-17-3p	XLOC_009948	-0.82133	0.0450327	ENSOCUG00000000097	-0.979145	0.000647885
ocu-miR-17-3p	XLOC_074522	-0.819535	0.045913	ENSOCUG00000000097	-0.979145	0.000647885
ocu-miR-17-3p	XLOC_061480	-0.818724	0.046313	ENSOCUG00000000097	-0.979145	0.000647885
ocu-miR-34c-5p	XLOC_052285	-0.979926	0.000600376	ENSOCUG00000005785	-0.978973	0.000658535
ocu-miR-34c-5p	XLOC_015331	-0.92583	0.00804777	ENSOCUG00000005785	-0.978973	0.000658535
ocu-miR-34c-5p	XLOC_014121	-0.924116	0.00841914	ENSOCUG00000005785	-0.978973	0.000658535
ocu-miR-34c-5p	XLOC_016645	-0.889531	0.017631	ENSOCUG00000005785	-0.978973	0.000658535
ocu-miR-34c-5p	XLOC_013838	-0.873458	0.0230063	ENSOCUG00000005785	-0.978973	0.000658535
ocu-miR-34c-5p	XLOC_058334	-0.817265	0.0470373	ENSOCUG00000005785	-0.978973	0.000658535
ocu-miR-30d-5p	XLOC_055203	-0.986691	0.0002645	ENSOCUG00000024108	-0.978858	0.000665754
ocu-miR-30d-5p	XLOC_052285	-0.932024	0.00677399	ENSOCUG00000024108	-0.978858	0.000665754
ocu-miR-30d-5p	XLOC_021052	-0.87669	0.0218704	ENSOCUG00000024108	-0.978858	0.000665754
ocu-miR-1249-5p	XLOC_071193	-0.985509	0.000313471	ENSOCUG00000010843	-0.978729	0.000673871
ocu-miR-1249-5p	XLOC_035023	-0.984673	0.000350573	ENSOCUG00000010843	-0.978729	0.000673871
ocu-miR-1249-5p	XLOC_062719	-0.96251	0.00208195	ENSOCUG00000010843	-0.978729	0.000673871
ocu-miR-1249-5p	XLOC_069852	-0.935212	0.00616019	ENSOCUG00000010843	-0.978729	0.000673871
ocu-miR-1249-5p	XLOC_034563	-0.90874	0.0121125	ENSOCUG00000010843	-0.978729	0.000673871
ocu-miR-1249-5p	XLOC_054413	-0.905965	0.012848	ENSOCUG00000010843	-0.978729	0.000673871
ocu-miR-1249-5p	XLOC_058032	-0.879771	0.0208136	ENSOCUG00000010843	-0.978729	0.000673871
ocu-miR-1249-5p	XLOC_044121	-0.868488	0.0248057	ENSOCUG00000010843	-0.978729	0.000673871
ocu-miR-1249-5p	XLOC_061493	-0.862947	0.0268882	ENSOCUG00000010843	-0.978729	0.000673871
ocu-miR-1249-5p	XLOC_040494	-0.862537	0.0270454	ENSOCUG00000010843	-0.978729	0.000673871
ocu-miR-1249-5p	XLOC_042760	-0.857471	0.0290239	ENSOCUG00000010843	-0.978729	0.000673871
ocu-miR-1249-5p	XLOC_004867	-0.852802	0.0309061	ENSOCUG00000010843	-0.978729	0.000673871
ocu-miR-1249-5p	XLOC_034563	-0.839953	0.036373	ENSOCUG00000010843	-0.978729	0.000673871
ocu-miR-1249-5p	XLOC_013716	-0.814239	0.0485559	ENSOCUG00000010843	-0.978729	0.000673871
ocu-miR-1249-5p	XLOC_013716	-0.812106	0.0496397	ENSOCUG00000010843	-0.978729	0.000673871
ocu-miR-130b-5p	XLOC_005253	-0.968705	0.00145378	ENSOCUG00000012633	-0.978608	0.00068153
ocu-miR-130b-5p	XLOC_070856	-0.958099	0.00259681	ENSOCUG00000012633	-0.978608	0.00068153
ocu-miR-130b-5p	XLOC_052285	-0.89307	0.0165398	ENSOCUG00000012633	-0.978608	0.00068153
ocu-miR-130b-5p	XLOC_069717	-0.878012	0.0214139	ENSOCUG00000012633	-0.978608	0.00068153
ocu-miR-92a-2-5p	XLOC_055203	-0.887362	0.0183163	ENSOCUG00000015499	-0.978542	0.000685754
ocu-miR-92a-2-5p	XLOC_037590	-0.877833	0.0214755	ENSOCUG00000015499	-0.978542	0.000685754
ocu-miR-92a-2-5p	XLOC_014121	-0.855797	0.0296926	ENSOCUG00000015499	-0.978542	0.000685754
ocu-miR-92a-2-5p	XLOC_038340	-0.85172	0.0313504	ENSOCUG00000015499	-0.978542	0.000685754
ocu-miR-92a-2-5p	XLOC_069717	-0.84387	0.0346619	ENSOCUG00000015499	-0.978542	0.000685754
ocu-miR-652-3p	XLOC_031915	-0.970657	0.00127892	ENSOCUG00000013563	-0.978225	0.000706069
ocu-miR-652-3p	XLOC_074487	-0.812015	0.0496861	ENSOCUG00000013563	-0.978225	0.000706069
novel_233	XLOC_070856	-0.970663	0.00127838	ENSOCUG00000016267	-0.978171	0.000709528
novel_233	XLOC_069717	-0.904419	0.0132669	ENSOCUG00000016267	-0.978171	0.000709528
novel_233	XLOC_055203	-0.861879	0.0272988	ENSOCUG00000016267	-0.978171	0.000709528
novel_233	XLOC_061480	-0.820568	0.0454055	ENSOCUG00000016267	-0.978171	0.000709528
novel_1	XLOC_058032	-0.899647	0.0146008	ENSOCUG00000014596	-0.978093	0.000714623
novel_1	XLOC_013910	-0.895188	0.0159025	ENSOCUG00000014596	-0.978093	0.000714623
novel_1	XLOC_040494	-0.862358	0.0271141	ENSOCUG00000014596	-0.978093	0.000714623
novel_1	XLOC_040494	-0.859919	0.0280596	ENSOCUG00000014596	-0.978093	0.000714623
novel_1	XLOC_075233	-0.817244	0.0470477	ENSOCUG00000014596	-0.978093	0.000714623
ocu-miR-92a-2-5p	XLOC_055203	-0.887362	0.0183163	ENSOCUG00000012670	-0.978007	0.000720203
ocu-miR-92a-2-5p	XLOC_037590	-0.877833	0.0214755	ENSOCUG00000012670	-0.978007	0.000720203
ocu-miR-92a-2-5p	XLOC_014121	-0.855797	0.0296926	ENSOCUG00000012670	-0.978007	0.000720203
ocu-miR-92a-2-5p	XLOC_038340	-0.85172	0.0313504	ENSOCUG00000012670	-0.978007	0.000720203
ocu-miR-92a-2-5p	XLOC_069717	-0.84387	0.0346619	ENSOCUG00000012670	-0.978007	0.000720203
ocu-miR-103a-3p	XLOC_052285	-0.935218	0.00615911	ENSOCUG00000026068	-0.978006	0.000720278
ocu-miR-103a-3p	XLOC_021052	-0.859835	0.0280926	ENSOCUG00000026068	-0.978006	0.000720278
ocu-miR-103a-3p	XLOC_004142	-0.816707	0.0473156	ENSOCUG00000026068	-0.978006	0.000720278
ocu-miR-652-5p	XLOC_052285	-0.815138	0.0481024	ENSOCUG00000013393	-0.977783	0.000734929
ocu-miR-424-5p	XLOC_058242	-0.874414	0.0226675	ENSOCUG00000029529	-0.977701	0.000740315
ocu-miR-424-5p	XLOC_050476	-0.855486	0.0298173	ENSOCUG00000029529	-0.977701	0.000740315
ocu-miR-424-5p	XLOC_039828	-0.82015	0.0456105	ENSOCUG00000029529	-0.977701	0.000740315
ocu-miR-424-5p	XLOC_029150	-0.813394	0.0489837	ENSOCUG00000029529	-0.977701	0.000740315
ocu-miR-424-5p	XLOC_072231	-0.812212	0.0495854	ENSOCUG00000029529	-0.977701	0.000740315
ocu-miR-19a-3p	XLOC_070856	-0.951364	0.00349073	ENSOCUG00000012633	-0.977661	0.000742961
ocu-miR-19a-3p	XLOC_037590	-0.831128	0.0403688	ENSOCUG00000012633	-0.977661	0.000742961
ocu-let-7f-5p	XLOC_052494	-0.848947	0.0325022	ENSOCUG00000024108	-0.977635	0.000744728
ocu-let-7f-5p	XLOC_046949	-0.822209	0.0446044	ENSOCUG00000024108	-0.977635	0.000744728
ocu-miR-541-3p	XLOC_057908	-0.878169	0.02136	ENSOCUG00000015880	-0.977568	0.000749119
ocu-miR-541-3p	XLOC_062854	-0.866325	0.0256092	ENSOCUG00000015880	-0.977568	0.000749119
ocu-miR-302a-5p	XLOC_064410	-0.881533	0.0202203	ENSOCUG00000005295	-0.977543	0.000750793
ocu-miR-302a-5p	XLOC_041827	-0.862287	0.0271416	ENSOCUG00000005295	-0.977543	0.000750793
ocu-miR-302a-5p	XLOC_060462	-0.849913	0.0320989	ENSOCUG00000005295	-0.977543	0.000750793
ocu-miR-302a-5p	XLOC_043669	-0.813225	0.0490696	ENSOCUG00000005295	-0.977543	0.000750793
ocu-miR-302a-5p	XLOC_050625	-0.811973	0.0497076	ENSOCUG00000005295	-0.977543	0.000750793
ocu-miR-708-5p	XLOC_050476	-0.931544	0.00686897	ENSOCUG00000023588	-0.977434	0.000758074
ocu-miR-708-5p	XLOC_069250	-0.902162	0.0138902	ENSOCUG00000023588	-0.977434	0.000758074
ocu-miR-708-5p	XLOC_046675	-0.881734	0.0201532	ENSOCUG00000023588	-0.977434	0.000758074
ocu-miR-708-5p	XLOC_077233	-0.878314	0.0213104	ENSOCUG00000023588	-0.977434	0.000758074
ocu-miR-708-5p	XLOC_030356	-0.865032	0.0260954	ENSOCUG00000023588	-0.977434	0.000758074
ocu-miR-708-5p	XLOC_058286	-0.860224	0.0279407	ENSOCUG00000023588	-0.977434	0.000758074
ocu-miR-708-5p	XLOC_050514	-0.858304	0.0286941	ENSOCUG00000023588	-0.977434	0.000758074
ocu-miR-708-5p	XLOC_072231	-0.846808	0.033404	ENSOCUG00000023588	-0.977434	0.000758074
ocu-miR-708-5p	XLOC_005377	-0.845462	0.0339776	ENSOCUG00000023588	-0.977434	0.000758074
ocu-miR-708-5p	XLOC_069960	-0.837882	0.0372931	ENSOCUG00000023588	-0.977434	0.000758074
ocu-miR-708-5p	XLOC_022364	-0.834333	0.038895	ENSOCUG00000023588	-0.977434	0.000758074
ocu-miR-708-5p	XLOC_055553	-0.832476	0.0397459	ENSOCUG00000023588	-0.977434	0.000758074
ocu-miR-708-5p	XLOC_065024	-0.831369	0.0402572	ENSOCUG00000023588	-0.977434	0.000758074
ocu-miR-708-5p	XLOC_034251	-0.824792	0.0433577	ENSOCUG00000023588	-0.977434	0.000758074
ocu-miR-708-5p	XLOC_069317	-0.818144	0.0466004	ENSOCUG00000023588	-0.977434	0.000758074
ocu-miR-452-5p	XLOC_006635	-0.947799	0.00401627	ENSOCUG00000015277	-0.977307	0.000766589
ocu-miR-452-5p	XLOC_009780	-0.93166	0.00684589	ENSOCUG00000015277	-0.977307	0.000766589
ocu-miR-452-5p	XLOC_021856	-0.929046	0.00737304	ENSOCUG00000015277	-0.977307	0.000766589
ocu-miR-452-5p	XLOC_043244	-0.92865	0.0074547	ENSOCUG00000015277	-0.977307	0.000766589
ocu-miR-452-5p	XLOC_073374	-0.921147	0.00908164	ENSOCUG00000015277	-0.977307	0.000766589
ocu-miR-452-5p	XLOC_051904	-0.916691	0.0101215	ENSOCUG00000015277	-0.977307	0.000766589
ocu-miR-452-5p	XLOC_065311	-0.916623	0.0101377	ENSOCUG00000015277	-0.977307	0.000766589
ocu-miR-452-5p	XLOC_001389	-0.915868	0.0103194	ENSOCUG00000015277	-0.977307	0.000766589
ocu-miR-452-5p	XLOC_071014	-0.914692	0.0106058	ENSOCUG00000015277	-0.977307	0.000766589
ocu-miR-452-5p	XLOC_037129	-0.913867	0.0108088	ENSOCUG00000015277	-0.977307	0.000766589
ocu-miR-452-5p	XLOC_021929	-0.912998	0.0110247	ENSOCUG00000015277	-0.977307	0.000766589
ocu-miR-452-5p	XLOC_040461	-0.910543	0.0116459	ENSOCUG00000015277	-0.977307	0.000766589
ocu-miR-452-5p	XLOC_027971	-0.910418	0.011678	ENSOCUG00000015277	-0.977307	0.000766589
ocu-miR-452-5p	XLOC_011506	-0.910399	0.0116829	ENSOCUG00000015277	-0.977307	0.000766589
ocu-miR-452-5p	XLOC_073996	-0.910149	0.011747	ENSOCUG00000015277	-0.977307	0.000766589
ocu-miR-452-5p	XLOC_062964	-0.90958	0.011894	ENSOCUG00000015277	-0.977307	0.000766589
ocu-miR-452-5p	XLOC_049214	-0.90804	0.0122962	ENSOCUG00000015277	-0.977307	0.000766589
ocu-miR-452-5p	XLOC_010558	-0.907689	0.0123886	ENSOCUG00000015277	-0.977307	0.000766589
ocu-miR-452-5p	XLOC_064790	-0.907349	0.0124785	ENSOCUG00000015277	-0.977307	0.000766589
ocu-miR-452-5p	XLOC_004699	-0.906619	0.012673	ENSOCUG00000015277	-0.977307	0.000766589
ocu-miR-452-5p	XLOC_007967	-0.906544	0.012693	ENSOCUG00000015277	-0.977307	0.000766589
ocu-miR-452-5p	XLOC_039148	-0.905971	0.0128464	ENSOCUG00000015277	-0.977307	0.000766589
ocu-miR-452-5p	XLOC_073374	-0.904927	0.0131286	ENSOCUG00000015277	-0.977307	0.000766589
ocu-miR-452-5p	XLOC_015763	-0.904368	0.0132808	ENSOCUG00000015277	-0.977307	0.000766589
ocu-miR-452-5p	XLOC_038015	-0.904293	0.0133013	ENSOCUG00000015277	-0.977307	0.000766589
ocu-miR-452-5p	XLOC_022075	-0.904151	0.0133403	ENSOCUG00000015277	-0.977307	0.000766589
ocu-miR-452-5p	XLOC_005676	-0.903235	0.0135921	ENSOCUG00000015277	-0.977307	0.000766589
ocu-miR-452-5p	XLOC_049412	-0.902696	0.0137413	ENSOCUG00000015277	-0.977307	0.000766589
ocu-miR-452-5p	XLOC_000601	-0.900332	0.0144056	ENSOCUG00000015277	-0.977307	0.000766589
ocu-miR-452-5p	XLOC_047731	-0.897755	0.0151467	ENSOCUG00000015277	-0.977307	0.000766589
ocu-miR-452-5p	XLOC_045381	-0.896875	0.0154037	ENSOCUG00000015277	-0.977307	0.000766589
ocu-miR-452-5p	XLOC_019660	-0.89686	0.0154083	ENSOCUG00000015277	-0.977307	0.000766589
ocu-miR-452-5p	XLOC_025091	-0.895594	0.0157818	ENSOCUG00000015277	-0.977307	0.000766589
ocu-miR-452-5p	XLOC_035367	-0.895567	0.0157898	ENSOCUG00000015277	-0.977307	0.000766589
ocu-miR-452-5p	XLOC_009976	-0.895376	0.0158467	ENSOCUG00000015277	-0.977307	0.000766589
ocu-miR-452-5p	XLOC_024947	-0.895201	0.0158988	ENSOCUG00000015277	-0.977307	0.000766589
ocu-miR-452-5p	XLOC_012165	-0.894303	0.0161675	ENSOCUG00000015277	-0.977307	0.000766589
ocu-miR-452-5p	XLOC_052220	-0.890435	0.0173492	ENSOCUG00000015277	-0.977307	0.000766589
ocu-miR-452-5p	XLOC_044422	-0.8855	0.0189148	ENSOCUG00000015277	-0.977307	0.000766589
ocu-miR-452-5p	XLOC_053607	-0.885319	0.0189734	ENSOCUG00000015277	-0.977307	0.000766589
ocu-miR-452-5p	XLOC_038877	-0.885105	0.0190428	ENSOCUG00000015277	-0.977307	0.000766589
ocu-miR-452-5p	XLOC_061012	-0.883226	0.0196582	ENSOCUG00000015277	-0.977307	0.000766589
ocu-miR-452-5p	XLOC_057299	-0.88268	0.0198385	ENSOCUG00000015277	-0.977307	0.000766589
ocu-miR-452-5p	XLOC_069541	-0.882263	0.0199771	ENSOCUG00000015277	-0.977307	0.000766589
ocu-miR-452-5p	XLOC_047597	-0.880409	0.0205978	ENSOCUG00000015277	-0.977307	0.000766589
ocu-miR-452-5p	XLOC_072493	-0.87963	0.0208615	ENSOCUG00000015277	-0.977307	0.000766589
ocu-miR-452-5p	XLOC_048617	-0.878241	0.0213352	ENSOCUG00000015277	-0.977307	0.000766589
ocu-miR-452-5p	XLOC_009780	-0.876846	0.0218164	ENSOCUG00000015277	-0.977307	0.000766589
ocu-miR-452-5p	XLOC_062791	-0.876297	0.0220071	ENSOCUG00000015277	-0.977307	0.000766589
ocu-miR-452-5p	XLOC_041177	-0.874393	0.0226749	ENSOCUG00000015277	-0.977307	0.000766589
ocu-miR-452-5p	XLOC_010536	-0.873139	0.0231199	ENSOCUG00000015277	-0.977307	0.000766589
ocu-miR-452-5p	XLOC_001579	-0.872471	0.0233584	ENSOCUG00000015277	-0.977307	0.000766589
ocu-miR-452-5p	XLOC_058059	-0.872187	0.0234602	ENSOCUG00000015277	-0.977307	0.000766589
ocu-miR-452-5p	XLOC_006697	-0.871147	0.0238348	ENSOCUG00000015277	-0.977307	0.000766589
ocu-miR-452-5p	XLOC_010604	-0.870811	0.0239565	ENSOCUG00000015277	-0.977307	0.000766589
ocu-miR-452-5p	XLOC_076929	-0.870639	0.0240192	ENSOCUG00000015277	-0.977307	0.000766589
ocu-miR-452-5p	XLOC_048618	-0.870484	0.0240752	ENSOCUG00000015277	-0.977307	0.000766589
ocu-miR-452-5p	XLOC_071141	-0.869801	0.024324	ENSOCUG00000015277	-0.977307	0.000766589
ocu-miR-452-5p	XLOC_011751	-0.868799	0.0246914	ENSOCUG00000015277	-0.977307	0.000766589
ocu-miR-452-5p	XLOC_008325	-0.86796	0.0250008	ENSOCUG00000015277	-0.977307	0.000766589
ocu-miR-452-5p	XLOC_001389	-0.867498	0.0251719	ENSOCUG00000015277	-0.977307	0.000766589
ocu-miR-452-5p	XLOC_003345	-0.865234	0.0260189	ENSOCUG00000015277	-0.977307	0.000766589
ocu-miR-452-5p	XLOC_071014	-0.863461	0.0266917	ENSOCUG00000015277	-0.977307	0.000766589
ocu-miR-452-5p	XLOC_037129	-0.863452	0.026695	ENSOCUG00000015277	-0.977307	0.000766589
ocu-miR-452-5p	XLOC_061007	-0.863263	0.0267671	ENSOCUG00000015277	-0.977307	0.000766589
ocu-miR-452-5p	XLOC_031578	-0.863165	0.0268047	ENSOCUG00000015277	-0.977307	0.000766589
ocu-miR-452-5p	XLOC_034393	-0.863165	0.0268047	ENSOCUG00000015277	-0.977307	0.000766589
ocu-miR-452-5p	XLOC_065151	-0.863165	0.0268047	ENSOCUG00000015277	-0.977307	0.000766589
ocu-miR-452-5p	XLOC_027227	-0.862928	0.0268955	ENSOCUG00000015277	-0.977307	0.000766589
ocu-miR-452-5p	XLOC_010604	-0.861232	0.0275489	ENSOCUG00000015277	-0.977307	0.000766589
ocu-miR-452-5p	XLOC_061007	-0.860997	0.0276397	ENSOCUG00000015277	-0.977307	0.000766589
ocu-miR-452-5p	XLOC_024044	-0.859713	0.0281402	ENSOCUG00000015277	-0.977307	0.000766589
ocu-miR-452-5p	XLOC_062997	-0.859205	0.0283394	ENSOCUG00000015277	-0.977307	0.000766589
ocu-miR-452-5p	XLOC_024482	-0.858765	0.0285124	ENSOCUG00000015277	-0.977307	0.000766589
ocu-miR-452-5p	XLOC_028525	-0.858541	0.0286005	ENSOCUG00000015277	-0.977307	0.000766589
ocu-miR-452-5p	XLOC_035834	-0.85767	0.0289451	ENSOCUG00000015277	-0.977307	0.000766589
ocu-miR-452-5p	XLOC_044422	-0.855145	0.0299548	ENSOCUG00000015277	-0.977307	0.000766589
ocu-miR-452-5p	XLOC_008852	-0.855039	0.0299975	ENSOCUG00000015277	-0.977307	0.000766589
ocu-miR-452-5p	XLOC_034890	-0.854403	0.0302544	ENSOCUG00000015277	-0.977307	0.000766589
ocu-miR-452-5p	XLOC_056275	-0.853603	0.0305795	ENSOCUG00000015277	-0.977307	0.000766589
ocu-miR-452-5p	XLOC_063949	-0.853113	0.0307791	ENSOCUG00000015277	-0.977307	0.000766589
ocu-miR-452-5p	XLOC_073215	-0.852249	0.0311328	ENSOCUG00000015277	-0.977307	0.000766589
ocu-miR-452-5p	XLOC_039641	-0.848936	0.0325068	ENSOCUG00000015277	-0.977307	0.000766589
ocu-miR-452-5p	XLOC_020914	-0.848268	0.0327872	ENSOCUG00000015277	-0.977307	0.000766589
ocu-miR-452-5p	XLOC_039828	-0.847973	0.0329116	ENSOCUG00000015277	-0.977307	0.000766589
ocu-miR-452-5p	XLOC_056563	-0.84769	0.0330308	ENSOCUG00000015277	-0.977307	0.000766589
ocu-miR-452-5p	XLOC_057239	-0.847149	0.0332596	ENSOCUG00000015277	-0.977307	0.000766589
ocu-miR-452-5p	XLOC_014213	-0.844596	0.034349	ENSOCUG00000015277	-0.977307	0.000766589
ocu-miR-452-5p	XLOC_065625	-0.843774	0.0347034	ENSOCUG00000015277	-0.977307	0.000766589
ocu-miR-452-5p	XLOC_031921	-0.839601	0.0365282	ENSOCUG00000015277	-0.977307	0.000766589
ocu-miR-452-5p	XLOC_063747	-0.838327	0.0370944	ENSOCUG00000015277	-0.977307	0.000766589
ocu-miR-452-5p	XLOC_069541	-0.835599	0.0383198	ENSOCUG00000015277	-0.977307	0.000766589
ocu-miR-452-5p	XLOC_069541	-0.833282	0.0393755	ENSOCUG00000015277	-0.977307	0.000766589
ocu-miR-452-5p	XLOC_010607	-0.827885	0.0418858	ENSOCUG00000015277	-0.977307	0.000766589
ocu-miR-452-5p	XLOC_047577	-0.827531	0.042053	ENSOCUG00000015277	-0.977307	0.000766589
ocu-miR-452-5p	XLOC_062893	-0.818915	0.0462188	ENSOCUG00000015277	-0.977307	0.000766589
ocu-miR-452-5p	XLOC_028030	-0.818534	0.0464069	ENSOCUG00000015277	-0.977307	0.000766589
ocu-miR-452-5p	XLOC_013546	-0.811441	0.0499799	ENSOCUG00000015277	-0.977307	0.000766589
ocu-miR-182-5p	XLOC_073045	-0.846384	0.0335844	ENSOCUG00000009956	-0.977268	0.000769246
ocu-miR-182-5p	XLOC_068665	-0.846243	0.0336444	ENSOCUG00000009956	-0.977268	0.000769246
ocu-miR-182-5p	XLOC_043669	-0.813899	0.0487277	ENSOCUG00000009956	-0.977268	0.000769246
ocu-miR-33a-3p	XLOC_061480	-0.826328	0.0426239	ENSOCUG00000001175	-0.977238	0.000771274
ocu-miR-16b-5p	XLOC_069717	-0.909033	0.0120361	ENSOCUG00000014159	-0.977091	0.000781214
ocu-miR-16b-5p	XLOC_048321	-0.881793	0.0201335	ENSOCUG00000014159	-0.977091	0.000781214
ocu-miR-16b-5p	XLOC_052285	-0.87254	0.0233339	ENSOCUG00000014159	-0.977091	0.000781214
ocu-miR-16b-5p	XLOC_061480	-0.856909	0.0292476	ENSOCUG00000014159	-0.977091	0.000781214
ocu-miR-16b-5p	XLOC_037590	-0.844571	0.0343596	ENSOCUG00000014159	-0.977091	0.000781214
ocu-miR-16b-5p	XLOC_060914	-0.82013	0.0456203	ENSOCUG00000014159	-0.977091	0.000781214
ocu-miR-509b-5p	XLOC_028715	-0.988366	0.000202231	ENSOCUG00000004458	-0.976846	0.000797956
ocu-miR-509b-5p	XLOC_072283	-0.957549	0.00266487	ENSOCUG00000004458	-0.976846	0.000797956
ocu-miR-509b-5p	XLOC_037669	-0.952747	0.00329655	ENSOCUG00000004458	-0.976846	0.000797956
ocu-miR-509b-5p	XLOC_071615	-0.951262	0.00350524	ENSOCUG00000004458	-0.976846	0.000797956
ocu-miR-509b-5p	XLOC_048275	-0.926604	0.00788282	ENSOCUG00000004458	-0.976846	0.000797956
ocu-miR-509b-5p	XLOC_076014	-0.918722	0.00964062	ENSOCUG00000004458	-0.976846	0.000797956
ocu-miR-509b-5p	XLOC_009780	-0.871175	0.023825	ENSOCUG00000004458	-0.976846	0.000797956
ocu-miR-509b-5p	XLOC_022876	-0.857174	0.0291421	ENSOCUG00000004458	-0.976846	0.000797956
ocu-miR-509b-5p	XLOC_063387	-0.832514	0.0397284	ENSOCUG00000004458	-0.976846	0.000797956
ocu-miR-509b-5p	XLOC_072743	-0.824833	0.0433379	ENSOCUG00000004458	-0.976846	0.000797956
ocu-miR-509b-5p	XLOC_047355	-0.824275	0.0436058	ENSOCUG00000004458	-0.976846	0.000797956
ocu-miR-509b-5p	XLOC_060459	-0.816999	0.0471698	ENSOCUG00000004458	-0.976846	0.000797956
ocu-miR-432-5p	XLOC_039828	-0.86822	0.0249047	ENSOCUG00000004135	-0.976792	0.000801679
ocu-miR-432-5p	XLOC_070374	-0.833244	0.0393928	ENSOCUG00000004135	-0.976792	0.000801679
ocu-miR-150-3p	XLOC_052285	-0.922809	0.00870763	ENSOCUG00000012633	-0.976751	0.000804506
ocu-miR-150-3p	XLOC_055203	-0.873287	0.023067	ENSOCUG00000012633	-0.976751	0.000804506
ocu-miR-150-3p	XLOC_055875	-0.868708	0.0247248	ENSOCUG00000012633	-0.976751	0.000804506
ocu-miR-93-5p	XLOC_005253	-0.928257	0.00753598	ENSOCUG00000010587	-0.976737	0.000805474
ocu-miR-93-5p	XLOC_069717	-0.926957	0.00780804	ENSOCUG00000010587	-0.976737	0.000805474
ocu-miR-93-5p	XLOC_061480	-0.862262	0.0271509	ENSOCUG00000010587	-0.976737	0.000805474
ocu-miR-93-5p	XLOC_053429	-0.845714	0.0338701	ENSOCUG00000010587	-0.976737	0.000805474
ocu-miR-6529-3p	XLOC_055203	-0.872627	0.0233027	ENSOCUG00000005669	-0.976635	0.000812473
ocu-miR-6529-3p	XLOC_052494	-0.821413	0.0449921	ENSOCUG00000005669	-0.976635	0.000812473
ocu-miR-6529-3p	XLOC_047024	-0.81633	0.047504	ENSOCUG00000005669	-0.976635	0.000812473
ocu-miR-17-5p	XLOC_005253	-0.949251	0.00379781	ENSOCUG00000007211	-0.976584	0.000816018
ocu-miR-17-5p	XLOC_069717	-0.894175	0.0162058	ENSOCUG00000007211	-0.976584	0.000816018
ocu-miR-17-5p	XLOC_053429	-0.852249	0.0311327	ENSOCUG00000007211	-0.976584	0.000816018
ocu-miR-17-5p	XLOC_055203	-0.847994	0.0329027	ENSOCUG00000007211	-0.976584	0.000816018
ocu-miR-17-5p	XLOC_061480	-0.836424	0.0379472	ENSOCUG00000007211	-0.976584	0.000816018
ocu-miR-12090-5p	XLOC_055875	-0.928953	0.0073922	ENSOCUG00000001175	-0.976542	0.000818934
ocu-miR-12090-5p	XLOC_013838	-0.856424	0.0294412	ENSOCUG00000001175	-0.976542	0.000818934
ocu-miR-25-5p	XLOC_038340	-0.879715	0.0208326	ENSOCUG00000016002	-0.976312	0.00083504
ocu-miR-25-5p	XLOC_055203	-0.868884	0.0246601	ENSOCUG00000016002	-0.976312	0.00083504
ocu-miR-25-5p	XLOC_069717	-0.856965	0.0292255	ENSOCUG00000016002	-0.976312	0.00083504
ocu-miR-25-5p	XLOC_037590	-0.853034	0.0308115	ENSOCUG00000016002	-0.976312	0.00083504
ocu-miR-25-5p	XLOC_015331	-0.825787	0.0428814	ENSOCUG00000016002	-0.976312	0.00083504
ocu-miR-25-5p	XLOC_053429	-0.821231	0.0450809	ENSOCUG00000016002	-0.976312	0.00083504
ocu-miR-350-5p	XLOC_052285	-0.985977	0.000293603	ENSOCUG00000005474	-0.976288	0.000836691
ocu-miR-350-5p	XLOC_055203	-0.940865	0.00514206	ENSOCUG00000005474	-0.976288	0.000836691
ocu-miR-350-5p	XLOC_008201	-0.879447	0.0209236	ENSOCUG00000005474	-0.976288	0.000836691
ocu-miR-350-5p	XLOC_053429	-0.850195	0.0319815	ENSOCUG00000005474	-0.976288	0.000836691
ocu-miR-350-5p	XLOC_047308	-0.820731	0.0453254	ENSOCUG00000005474	-0.976288	0.000836691
ocu-miR-350-5p	XLOC_020951	-0.816242	0.0475483	ENSOCUG00000005474	-0.976288	0.000836691
ocu-miR-19b-3p	XLOC_070856	-0.954134	0.00310727	ENSOCUG00000016267	-0.97609	0.00085068
ocu-miR-19b-3p	XLOC_037590	-0.866413	0.0255764	ENSOCUG00000016267	-0.97609	0.00085068
ocu-miR-12093-3p	XLOC_069865	-0.975703	0.000878329	ENSOCUG00000029494	-0.976029	0.000855052
ocu-miR-12093-3p	XLOC_066879	-0.939294	0.00541601	ENSOCUG00000029494	-0.976029	0.000855052
ocu-miR-12093-3p	XLOC_069424	-0.917753	0.00986867	ENSOCUG00000029494	-0.976029	0.000855052
ocu-miR-12093-3p	XLOC_071014	-0.914501	0.0106527	ENSOCUG00000029494	-0.976029	0.000855052
ocu-miR-12093-3p	XLOC_047983	-0.895248	0.0158847	ENSOCUG00000029494	-0.976029	0.000855052
ocu-miR-12093-3p	XLOC_017486	-0.848605	0.0326455	ENSOCUG00000029494	-0.976029	0.000855052
ocu-miR-12093-3p	XLOC_030356	-0.847022	0.0333135	ENSOCUG00000029494	-0.976029	0.000855052
ocu-miR-12093-3p	XLOC_050514	-0.84123	0.0358108	ENSOCUG00000029494	-0.976029	0.000855052
ocu-miR-505-3p	XLOC_005253	-0.948503	0.00390961	ENSOCUG00000008681	-0.975977	0.000858744
ocu-miR-505-3p	XLOC_055203	-0.849748	0.0321674	ENSOCUG00000008681	-0.975977	0.000858744
ocu-miR-505-3p	XLOC_071077	-0.839921	0.0363869	ENSOCUG00000008681	-0.975977	0.000858744
ocu-miR-106a-5p	XLOC_005253	-0.963986	0.00192219	ENSOCUG00000008127	-0.975847	0.000868035
ocu-miR-106a-5p	XLOC_055203	-0.876656	0.0218825	ENSOCUG00000008127	-0.975847	0.000868035
ocu-miR-106a-5p	XLOC_069717	-0.863926	0.0265146	ENSOCUG00000008127	-0.975847	0.000868035
ocu-miR-106a-5p	XLOC_053429	-0.83303	0.0394909	ENSOCUG00000008127	-0.975847	0.000868035
ocu-miR-25-5p	XLOC_038340	-0.879715	0.0208326	ENSOCUG00000000227	-0.975841	0.000868458
ocu-miR-25-5p	XLOC_055203	-0.868884	0.0246601	ENSOCUG00000000227	-0.975841	0.000868458
ocu-miR-25-5p	XLOC_069717	-0.856965	0.0292255	ENSOCUG00000000227	-0.975841	0.000868458
ocu-miR-25-5p	XLOC_037590	-0.853034	0.0308115	ENSOCUG00000000227	-0.975841	0.000868458
ocu-miR-25-5p	XLOC_015331	-0.825787	0.0428814	ENSOCUG00000000227	-0.975841	0.000868458
ocu-miR-25-5p	XLOC_053429	-0.821231	0.0450809	ENSOCUG00000000227	-0.975841	0.000868458
ocu-miR-200c-3p	XLOC_061480	-0.815581	0.0478793	ENSOCUG00000008127	-0.975629	0.000883652
ocu-miR-12090-3p	XLOC_005253	-0.975487	0.000893953	ENSOCUG00000005008	-0.975581	0.000887158
ocu-miR-12090-3p	XLOC_070856	-0.931707	0.00683661	ENSOCUG00000005008	-0.975581	0.000887158
ocu-miR-363-5p	XLOC_038340	-0.942769	0.00481929	ENSOCUG00000005579	-0.975283	0.000908847
ocu-miR-363-5p	XLOC_073119	-0.873238	0.0230845	ENSOCUG00000005579	-0.975283	0.000908847
ocu-miR-363-5p	XLOC_053429	-0.827378	0.0421257	ENSOCUG00000005579	-0.975283	0.000908847
ocu-miR-363-5p	XLOC_045965	-0.81299	0.0491888	ENSOCUG00000005579	-0.975283	0.000908847
ocu-miR-1249-5p	XLOC_071193	-0.985509	0.000313471	ENSOCUG00000004001	-0.975233	0.000912477
ocu-miR-1249-5p	XLOC_035023	-0.984673	0.000350573	ENSOCUG00000004001	-0.975233	0.000912477
ocu-miR-1249-5p	XLOC_062719	-0.96251	0.00208195	ENSOCUG00000004001	-0.975233	0.000912477
ocu-miR-1249-5p	XLOC_069852	-0.935212	0.00616019	ENSOCUG00000004001	-0.975233	0.000912477
ocu-miR-1249-5p	XLOC_034563	-0.90874	0.0121125	ENSOCUG00000004001	-0.975233	0.000912477
ocu-miR-1249-5p	XLOC_054413	-0.905965	0.012848	ENSOCUG00000004001	-0.975233	0.000912477
ocu-miR-1249-5p	XLOC_058032	-0.879771	0.0208136	ENSOCUG00000004001	-0.975233	0.000912477
ocu-miR-1249-5p	XLOC_044121	-0.868488	0.0248057	ENSOCUG00000004001	-0.975233	0.000912477
ocu-miR-1249-5p	XLOC_061493	-0.862947	0.0268882	ENSOCUG00000004001	-0.975233	0.000912477
ocu-miR-1249-5p	XLOC_040494	-0.862537	0.0270454	ENSOCUG00000004001	-0.975233	0.000912477
ocu-miR-1249-5p	XLOC_042760	-0.857471	0.0290239	ENSOCUG00000004001	-0.975233	0.000912477
ocu-miR-1249-5p	XLOC_004867	-0.852802	0.0309061	ENSOCUG00000004001	-0.975233	0.000912477
ocu-miR-1249-5p	XLOC_034563	-0.839953	0.036373	ENSOCUG00000004001	-0.975233	0.000912477
ocu-miR-1249-5p	XLOC_013716	-0.814239	0.0485559	ENSOCUG00000004001	-0.975233	0.000912477
ocu-miR-1249-5p	XLOC_013716	-0.812106	0.0496397	ENSOCUG00000004001	-0.975233	0.000912477
ocu-miR-22-3p	XLOC_073311	-0.88312	0.0196932	ENSOCUG00000001954	-0.975212	0.000914018
ocu-miR-22-3p	XLOC_042685	-0.876752	0.021849	ENSOCUG00000001954	-0.975212	0.000914018
ocu-miR-22-3p	XLOC_069960	-0.845171	0.0341021	ENSOCUG00000001954	-0.975212	0.000914018
ocu-miR-22-3p	XLOC_010690	-0.842907	0.035079	ENSOCUG00000001954	-0.975212	0.000914018
ocu-miR-22-3p	XLOC_071014	-0.842891	0.0350859	ENSOCUG00000001954	-0.975212	0.000914018
ocu-miR-22-3p	XLOC_069865	-0.830758	0.0405403	ENSOCUG00000001954	-0.975212	0.000914018
ocu-miR-22-3p	XLOC_068665	-0.824088	0.0436957	ENSOCUG00000001954	-0.975212	0.000914018
ocu-miR-138-5p	XLOC_020771	-0.968101	0.00151013	ENSOCUG00000008117	-0.975033	0.000927279
ocu-miR-138-5p	XLOC_058820	-0.933628	0.00646163	ENSOCUG00000008117	-0.975033	0.000927279
ocu-miR-138-5p	XLOC_066888	-0.933305	0.00652406	ENSOCUG00000008117	-0.975033	0.000927279
ocu-miR-138-5p	XLOC_076894	-0.932173	0.00674481	ENSOCUG00000008117	-0.975033	0.000927279
ocu-miR-138-5p	XLOC_039779	-0.929198	0.00734188	ENSOCUG00000008117	-0.975033	0.000927279
ocu-miR-138-5p	XLOC_065024	-0.925653	0.00808571	ENSOCUG00000008117	-0.975033	0.000927279
ocu-miR-138-5p	XLOC_028030	-0.92077	0.00916744	ENSOCUG00000008117	-0.975033	0.000927279
ocu-miR-138-5p	XLOC_069541	-0.916252	0.0102268	ENSOCUG00000008117	-0.975033	0.000927279
ocu-miR-138-5p	XLOC_050476	-0.911835	0.011317	ENSOCUG00000008117	-0.975033	0.000927279
ocu-miR-138-5p	XLOC_015746	-0.911542	0.0113912	ENSOCUG00000008117	-0.975033	0.000927279
ocu-miR-138-5p	XLOC_069355	-0.907756	0.012371	ENSOCUG00000008117	-0.975033	0.000927279
ocu-miR-138-5p	XLOC_047577	-0.899623	0.0146075	ENSOCUG00000008117	-0.975033	0.000927279
ocu-miR-138-5p	XLOC_030128	-0.895073	0.0159369	ENSOCUG00000008117	-0.975033	0.000927279
ocu-miR-138-5p	XLOC_014687	-0.894855	0.016002	ENSOCUG00000008117	-0.975033	0.000927279
ocu-miR-138-5p	XLOC_024816	-0.889516	0.0176357	ENSOCUG00000008117	-0.975033	0.000927279
ocu-miR-138-5p	XLOC_017389	-0.884003	0.0194024	ENSOCUG00000008117	-0.975033	0.000927279
ocu-miR-138-5p	XLOC_047983	-0.883083	0.0197053	ENSOCUG00000008117	-0.975033	0.000927279
ocu-miR-138-5p	XLOC_011750	-0.882734	0.0198206	ENSOCUG00000008117	-0.975033	0.000927279
ocu-miR-138-5p	XLOC_072915	-0.881988	0.0200686	ENSOCUG00000008117	-0.975033	0.000927279
ocu-miR-138-5p	XLOC_069541	-0.881938	0.0200852	ENSOCUG00000008117	-0.975033	0.000927279
ocu-miR-138-5p	XLOC_007203	-0.880576	0.0205417	ENSOCUG00000008117	-0.975033	0.000927279
ocu-miR-138-5p	XLOC_035968	-0.880354	0.0206164	ENSOCUG00000008117	-0.975033	0.000927279
ocu-miR-138-5p	XLOC_075791	-0.879089	0.0210455	ENSOCUG00000008117	-0.975033	0.000927279
ocu-miR-138-5p	XLOC_057188	-0.877836	0.0214746	ENSOCUG00000008117	-0.975033	0.000927279
ocu-miR-138-5p	XLOC_060100	-0.877574	0.0215647	ENSOCUG00000008117	-0.975033	0.000927279
ocu-miR-138-5p	XLOC_024816	-0.875754	0.0221967	ENSOCUG00000008117	-0.975033	0.000927279
ocu-miR-138-5p	XLOC_047597	-0.87373	0.0229095	ENSOCUG00000008117	-0.975033	0.000927279
ocu-miR-138-5p	XLOC_008325	-0.870216	0.0241729	ENSOCUG00000008117	-0.975033	0.000927279
ocu-miR-138-5p	XLOC_056593	-0.867058	0.0253354	ENSOCUG00000008117	-0.975033	0.000927279
ocu-miR-138-5p	XLOC_069541	-0.865663	0.0258574	ENSOCUG00000008117	-0.975033	0.000927279
ocu-miR-138-5p	XLOC_053871	-0.865556	0.0258977	ENSOCUG00000008117	-0.975033	0.000927279
ocu-miR-138-5p	XLOC_046127	-0.865047	0.0260895	ENSOCUG00000008117	-0.975033	0.000927279
ocu-miR-138-5p	XLOC_065625	-0.864477	0.0263051	ENSOCUG00000008117	-0.975033	0.000927279
ocu-miR-138-5p	XLOC_000180	-0.863678	0.026609	ENSOCUG00000008117	-0.975033	0.000927279
ocu-miR-138-5p	XLOC_073489	-0.863417	0.0267083	ENSOCUG00000008117	-0.975033	0.000927279
ocu-miR-138-5p	XLOC_010965	-0.863092	0.0268328	ENSOCUG00000008117	-0.975033	0.000927279
ocu-miR-138-5p	XLOC_020385	-0.861269	0.0275342	ENSOCUG00000008117	-0.975033	0.000927279
ocu-miR-138-5p	XLOC_009780	-0.860922	0.0276688	ENSOCUG00000008117	-0.975033	0.000927279
ocu-miR-138-5p	XLOC_063944	-0.859937	0.0280527	ENSOCUG00000008117	-0.975033	0.000927279
ocu-miR-138-5p	XLOC_009780	-0.858173	0.028746	ENSOCUG00000008117	-0.975033	0.000927279
ocu-miR-138-5p	XLOC_012209	-0.858171	0.0287468	ENSOCUG00000008117	-0.975033	0.000927279
ocu-miR-138-5p	XLOC_045973	-0.857785	0.0288996	ENSOCUG00000008117	-0.975033	0.000927279
ocu-miR-138-5p	XLOC_044422	-0.857618	0.0289659	ENSOCUG00000008117	-0.975033	0.000927279
ocu-miR-138-5p	XLOC_024947	-0.857596	0.0289744	ENSOCUG00000008117	-0.975033	0.000927279
ocu-miR-138-5p	XLOC_028491	-0.856203	0.0295298	ENSOCUG00000008117	-0.975033	0.000927279
ocu-miR-138-5p	XLOC_052729	-0.85609	0.0295749	ENSOCUG00000008117	-0.975033	0.000927279
ocu-miR-138-5p	XLOC_040116	-0.855691	0.0297351	ENSOCUG00000008117	-0.975033	0.000927279
ocu-miR-138-5p	XLOC_049906	-0.85548	0.0298198	ENSOCUG00000008117	-0.975033	0.000927279
ocu-miR-138-5p	XLOC_051617	-0.85548	0.02982	ENSOCUG00000008117	-0.975033	0.000927279
ocu-miR-138-5p	XLOC_047862	-0.855355	0.02987	ENSOCUG00000008117	-0.975033	0.000927279
ocu-miR-138-5p	XLOC_061007	-0.855328	0.029881	ENSOCUG00000008117	-0.975033	0.000927279
ocu-miR-138-5p	XLOC_061007	-0.85507	0.0299849	ENSOCUG00000008117	-0.975033	0.000927279
ocu-miR-138-5p	XLOC_066722	-0.854785	0.0301	ENSOCUG00000008117	-0.975033	0.000927279
ocu-miR-138-5p	XLOC_065201	-0.854103	0.0303762	ENSOCUG00000008117	-0.975033	0.000927279
ocu-miR-138-5p	XLOC_069210	-0.854042	0.0304008	ENSOCUG00000008117	-0.975033	0.000927279
ocu-miR-138-5p	XLOC_065201	-0.853888	0.0304635	ENSOCUG00000008117	-0.975033	0.000927279
ocu-miR-138-5p	XLOC_039593	-0.853458	0.0306382	ENSOCUG00000008117	-0.975033	0.000927279
ocu-miR-138-5p	XLOC_073215	-0.85312	0.0307764	ENSOCUG00000008117	-0.975033	0.000927279
ocu-miR-138-5p	XLOC_010965	-0.852913	0.0308608	ENSOCUG00000008117	-0.975033	0.000927279
ocu-miR-138-5p	XLOC_049412	-0.852658	0.0309651	ENSOCUG00000008117	-0.975033	0.000927279
ocu-miR-138-5p	XLOC_009039	-0.852395	0.0310727	ENSOCUG00000008117	-0.975033	0.000927279
ocu-miR-138-5p	XLOC_009976	-0.851703	0.0313575	ENSOCUG00000008117	-0.975033	0.000927279
ocu-miR-138-5p	XLOC_065556	-0.851326	0.0315128	ENSOCUG00000008117	-0.975033	0.000927279
ocu-miR-138-5p	XLOC_027382	-0.850885	0.0316952	ENSOCUG00000008117	-0.975033	0.000927279
ocu-miR-138-5p	XLOC_044422	-0.850542	0.0318374	ENSOCUG00000008117	-0.975033	0.000927279
ocu-miR-138-5p	XLOC_020385	-0.848754	0.0325832	ENSOCUG00000008117	-0.975033	0.000927279
ocu-miR-138-5p	XLOC_022126	-0.84869	0.0326098	ENSOCUG00000008117	-0.975033	0.000927279
ocu-miR-138-5p	XLOC_037195	-0.848622	0.0326384	ENSOCUG00000008117	-0.975033	0.000927279
ocu-miR-138-5p	XLOC_063895	-0.847965	0.032915	ENSOCUG00000008117	-0.975033	0.000927279
ocu-miR-138-5p	XLOC_047983	-0.847943	0.032924	ENSOCUG00000008117	-0.975033	0.000927279
ocu-miR-138-5p	XLOC_022075	-0.847644	0.0330503	ENSOCUG00000008117	-0.975033	0.000927279
ocu-miR-138-5p	XLOC_012300	-0.846576	0.0335027	ENSOCUG00000008117	-0.975033	0.000927279
ocu-miR-138-5p	XLOC_017347	-0.846009	0.0337441	ENSOCUG00000008117	-0.975033	0.000927279
ocu-miR-138-5p	XLOC_008833	-0.843691	0.0347393	ENSOCUG00000008117	-0.975033	0.000927279
ocu-miR-138-5p	XLOC_069960	-0.843249	0.0349307	ENSOCUG00000008117	-0.975033	0.000927279
ocu-miR-138-5p	XLOC_009780	-0.843205	0.0349496	ENSOCUG00000008117	-0.975033	0.000927279
ocu-miR-138-5p	XLOC_076872	-0.842689	0.0351735	ENSOCUG00000008117	-0.975033	0.000927279
ocu-miR-138-5p	XLOC_000601	-0.841721	0.0355957	ENSOCUG00000008117	-0.975033	0.000927279
ocu-miR-138-5p	XLOC_049214	-0.841465	0.0357078	ENSOCUG00000008117	-0.975033	0.000927279
ocu-miR-138-5p	XLOC_049430	-0.84106	0.0358854	ENSOCUG00000008117	-0.975033	0.000927279
ocu-miR-138-5p	XLOC_005858	-0.838919	0.0368309	ENSOCUG00000008117	-0.975033	0.000927279
ocu-miR-138-5p	XLOC_024044	-0.838878	0.0368489	ENSOCUG00000008117	-0.975033	0.000927279
ocu-miR-138-5p	XLOC_028715	-0.836914	0.0377268	ENSOCUG00000008117	-0.975033	0.000927279
ocu-miR-138-5p	XLOC_008320	-0.836755	0.0377983	ENSOCUG00000008117	-0.975033	0.000927279
ocu-miR-138-5p	XLOC_006794	-0.836511	0.0379081	ENSOCUG00000008117	-0.975033	0.000927279
ocu-miR-138-5p	XLOC_020385	-0.836155	0.0380686	ENSOCUG00000008117	-0.975033	0.000927279
ocu-miR-138-5p	XLOC_034235	-0.83604	0.0381205	ENSOCUG00000008117	-0.975033	0.000927279
ocu-miR-138-5p	XLOC_011506	-0.835992	0.038142	ENSOCUG00000008117	-0.975033	0.000927279
ocu-miR-138-5p	XLOC_028715	-0.835074	0.0385578	ENSOCUG00000008117	-0.975033	0.000927279
ocu-miR-138-5p	XLOC_023875	-0.833729	0.0391709	ENSOCUG00000008117	-0.975033	0.000927279
ocu-miR-138-5p	XLOC_036283	-0.83359	0.0392345	ENSOCUG00000008117	-0.975033	0.000927279
ocu-miR-138-5p	XLOC_052982	-0.833483	0.0392831	ENSOCUG00000008117	-0.975033	0.000927279
ocu-miR-138-5p	XLOC_057571	-0.833305	0.039365	ENSOCUG00000008117	-0.975033	0.000927279
ocu-miR-138-5p	XLOC_012300	-0.832996	0.0395065	ENSOCUG00000008117	-0.975033	0.000927279
ocu-miR-138-5p	XLOC_039828	-0.832103	0.0399179	ENSOCUG00000008117	-0.975033	0.000927279
ocu-miR-138-5p	XLOC_061006	-0.832065	0.039935	ENSOCUG00000008117	-0.975033	0.000927279
ocu-miR-138-5p	XLOC_051335	-0.831653	0.0401254	ENSOCUG00000008117	-0.975033	0.000927279
ocu-miR-138-5p	XLOC_010604	-0.829761	0.041005	ENSOCUG00000008117	-0.975033	0.000927279
ocu-miR-138-5p	XLOC_005858	-0.826508	0.0425383	ENSOCUG00000008117	-0.975033	0.000927279
ocu-miR-138-5p	XLOC_056387	-0.82613	0.0427181	ENSOCUG00000008117	-0.975033	0.000927279
ocu-miR-138-5p	XLOC_065428	-0.82605	0.0427563	ENSOCUG00000008117	-0.975033	0.000927279
ocu-miR-138-5p	XLOC_051968	-0.825865	0.0428445	ENSOCUG00000008117	-0.975033	0.000927279
ocu-miR-138-5p	XLOC_028030	-0.825316	0.0431065	ENSOCUG00000008117	-0.975033	0.000927279
ocu-miR-138-5p	XLOC_062893	-0.823643	0.0439103	ENSOCUG00000008117	-0.975033	0.000927279
ocu-miR-138-5p	XLOC_017205	-0.822123	0.0446464	ENSOCUG00000008117	-0.975033	0.000927279
ocu-miR-138-5p	XLOC_015763	-0.820944	0.0452213	ENSOCUG00000008117	-0.975033	0.000927279
ocu-miR-138-5p	XLOC_075851	-0.819716	0.0458238	ENSOCUG00000008117	-0.975033	0.000927279
ocu-miR-138-5p	XLOC_057325	-0.816396	0.0474712	ENSOCUG00000008117	-0.975033	0.000927279
ocu-miR-138-5p	XLOC_056275	-0.813622	0.0488678	ENSOCUG00000008117	-0.975033	0.000927279
ocu-miR-138-5p	XLOC_021856	-0.813121	0.0491222	ENSOCUG00000008117	-0.975033	0.000927279
ocu-miR-138-5p	XLOC_055394	-0.812556	0.0494101	ENSOCUG00000008117	-0.975033	0.000927279
ocu-miR-141-3p	XLOC_069717	-0.883578	0.0195422	ENSOCUG00000008127	-0.975022	0.000928055
ocu-miR-141-3p	XLOC_052285	-0.875461	0.0222993	ENSOCUG00000008127	-0.975022	0.000928055
ocu-miR-141-3p	XLOC_027918	-0.836904	0.0377314	ENSOCUG00000008127	-0.975022	0.000928055
ocu-miR-93-3p	XLOC_020384	-0.943976	0.00462015	ENSOCUG00000015408	-0.974944	0.000933873
ocu-miR-93-3p	XLOC_021052	-0.877621	0.0215485	ENSOCUG00000015408	-0.974944	0.000933873
ocu-miR-93-3p	XLOC_053431	-0.841262	0.0357968	ENSOCUG00000015408	-0.974944	0.000933873
ocu-miR-193a-3p	XLOC_045915	-0.820546	0.0454163	ENSOCUG00000016001	-0.97483	0.000942294
ocu-miR-193a-3p	XLOC_055338	-0.817266	0.0470369	ENSOCUG00000016001	-0.97483	0.000942294
ocu-miR-193a-3p	XLOC_055338	-0.81634	0.0474989	ENSOCUG00000016001	-0.97483	0.000942294
ocu-miR-23b-3p	XLOC_056075	-0.898373	0.0149673	ENSOCUG00000008221	-0.974577	0.000961292
ocu-miR-23b-3p	XLOC_058059	-0.892585	0.0166873	ENSOCUG00000008221	-0.974577	0.000961292
ocu-miR-23b-3p	XLOC_062893	-0.887056	0.0184141	ENSOCUG00000008221	-0.974577	0.000961292
ocu-miR-23b-3p	XLOC_020784	-0.885461	0.0189273	ENSOCUG00000008221	-0.974577	0.000961292
ocu-miR-23b-3p	XLOC_057188	-0.884131	0.0193606	ENSOCUG00000008221	-0.974577	0.000961292
ocu-miR-23b-3p	XLOC_062861	-0.881284	0.0203037	ENSOCUG00000008221	-0.974577	0.000961292
ocu-miR-23b-3p	XLOC_004037	-0.880633	0.0205224	ENSOCUG00000008221	-0.974577	0.000961292
ocu-miR-23b-3p	XLOC_053499	-0.880297	0.0206355	ENSOCUG00000008221	-0.974577	0.000961292
ocu-miR-23b-3p	XLOC_066722	-0.877624	0.0215475	ENSOCUG00000008221	-0.974577	0.000961292
ocu-miR-23b-3p	XLOC_020771	-0.877195	0.0216956	ENSOCUG00000008221	-0.974577	0.000961292
ocu-miR-23b-3p	XLOC_038340	-0.876955	0.0217785	ENSOCUG00000008221	-0.974577	0.000961292
ocu-miR-23b-3p	XLOC_062997	-0.870402	0.0241053	ENSOCUG00000008221	-0.974577	0.000961292
ocu-miR-23b-3p	XLOC_014307	-0.864071	0.0264591	ENSOCUG00000008221	-0.974577	0.000961292
ocu-miR-23b-3p	XLOC_017157	-0.863614	0.0266332	ENSOCUG00000008221	-0.974577	0.000961292
ocu-miR-23b-3p	XLOC_056075	-0.86208	0.027221	ENSOCUG00000008221	-0.974577	0.000961292
ocu-miR-23b-3p	XLOC_037129	-0.861102	0.0275991	ENSOCUG00000008221	-0.974577	0.000961292
ocu-miR-23b-3p	XLOC_065625	-0.860698	0.027756	ENSOCUG00000008221	-0.974577	0.000961292
ocu-miR-23b-3p	XLOC_010756	-0.85773	0.0289211	ENSOCUG00000008221	-0.974577	0.000961292
ocu-miR-23b-3p	XLOC_038877	-0.857076	0.0291812	ENSOCUG00000008221	-0.974577	0.000961292
ocu-miR-23b-3p	XLOC_051424	-0.854846	0.0300754	ENSOCUG00000008221	-0.974577	0.000961292
ocu-miR-23b-3p	XLOC_047577	-0.851901	0.031276	ENSOCUG00000008221	-0.974577	0.000961292
ocu-miR-23b-3p	XLOC_035834	-0.850413	0.0318907	ENSOCUG00000008221	-0.974577	0.000961292
ocu-miR-23b-3p	XLOC_015763	-0.845766	0.0338478	ENSOCUG00000008221	-0.974577	0.000961292
ocu-miR-23b-3p	XLOC_048723	-0.845601	0.0339181	ENSOCUG00000008221	-0.974577	0.000961292
ocu-miR-23b-3p	XLOC_004699	-0.843801	0.0346918	ENSOCUG00000008221	-0.974577	0.000961292
ocu-miR-23b-3p	XLOC_049214	-0.84204	0.0354563	ENSOCUG00000008221	-0.974577	0.000961292
ocu-miR-23b-3p	XLOC_027804	-0.842009	0.0354699	ENSOCUG00000008221	-0.974577	0.000961292
ocu-miR-23b-3p	XLOC_059754	-0.83836	0.0370797	ENSOCUG00000008221	-0.974577	0.000961292
ocu-miR-23b-3p	XLOC_052233	-0.835607	0.0383163	ENSOCUG00000008221	-0.974577	0.000961292
ocu-miR-23b-3p	XLOC_008325	-0.832618	0.0396803	ENSOCUG00000008221	-0.974577	0.000961292
ocu-miR-23b-3p	XLOC_005995	-0.831798	0.0400584	ENSOCUG00000008221	-0.974577	0.000961292
ocu-miR-23b-3p	XLOC_015839	-0.830609	0.0406098	ENSOCUG00000008221	-0.974577	0.000961292
ocu-miR-23b-3p	XLOC_053871	-0.830504	0.0406587	ENSOCUG00000008221	-0.974577	0.000961292
ocu-miR-23b-3p	XLOC_044490	-0.829398	0.0411749	ENSOCUG00000008221	-0.974577	0.000961292
ocu-miR-23b-3p	XLOC_048275	-0.825697	0.0429246	ENSOCUG00000008221	-0.974577	0.000961292
ocu-miR-23b-3p	XLOC_003039	-0.82352	0.0439694	ENSOCUG00000008221	-0.974577	0.000961292
ocu-miR-23b-3p	XLOC_009232	-0.821557	0.044922	ENSOCUG00000008221	-0.974577	0.000961292
ocu-miR-23b-3p	XLOC_024947	-0.820836	0.0452742	ENSOCUG00000008221	-0.974577	0.000961292
ocu-miR-23b-3p	XLOC_050473	-0.820089	0.0456404	ENSOCUG00000008221	-0.974577	0.000961292
ocu-miR-23b-3p	XLOC_050089	-0.819869	0.0457485	ENSOCUG00000008221	-0.974577	0.000961292
ocu-miR-23b-3p	XLOC_049412	-0.818476	0.0464358	ENSOCUG00000008221	-0.974577	0.000961292
ocu-miR-23b-3p	XLOC_064457	-0.817891	0.0467259	ENSOCUG00000008221	-0.974577	0.000961292
ocu-miR-23b-3p	XLOC_069541	-0.814846	0.0482491	ENSOCUG00000008221	-0.974577	0.000961292
ocu-miR-23b-3p	XLOC_010604	-0.814574	0.0483865	ENSOCUG00000008221	-0.974577	0.000961292
ocu-miR-23b-3p	XLOC_053607	-0.813609	0.0488745	ENSOCUG00000008221	-0.974577	0.000961292
ocu-miR-23b-3p	XLOC_074819	-0.812904	0.049233	ENSOCUG00000008221	-0.974577	0.000961292
ocu-miR-23b-3p	XLOC_056420	-0.811965	0.0497117	ENSOCUG00000008221	-0.974577	0.000961292
ocu-miR-23b-3p	XLOC_010536	-0.811777	0.0498076	ENSOCUG00000008221	-0.974577	0.000961292
ocu-miR-383-3p	XLOC_037590	-0.88093	0.0204225	ENSOCUG00000008127	-0.974572	0.000961634
ocu-miR-346-5p	XLOC_069717	-0.876241	0.0220268	ENSOCUG00000008127	-0.974572	0.000961634
ocu-miR-383-3p	XLOC_069717	-0.876241	0.0220268	ENSOCUG00000008127	-0.974572	0.000961634
ocu-miR-383-3p	XLOC_055203	-0.866811	0.0254275	ENSOCUG00000008127	-0.974572	0.000961634
ocu-miR-346-5p	XLOC_053429	-0.827449	0.0420922	ENSOCUG00000008127	-0.974572	0.000961634
ocu-miR-199a-5p	XLOC_062986	-0.846308	0.0336166	ENSOCUG00000027132	-0.974409	0.00097398
ocu-miR-185-5p	XLOC_034223	-0.904242	0.0133152	ENSOCUG00000013996	-0.974349	0.000978544
ocu-miR-185-5p	XLOC_035023	-0.90363	0.0134832	ENSOCUG00000013996	-0.974349	0.000978544
ocu-miR-185-5p	XLOC_010627	-0.88118	0.0203387	ENSOCUG00000013996	-0.974349	0.000978544
ocu-miR-185-5p	XLOC_062719	-0.879786	0.0208086	ENSOCUG00000013996	-0.974349	0.000978544
ocu-miR-185-5p	XLOC_013716	-0.872101	0.0234912	ENSOCUG00000013996	-0.974349	0.000978544
ocu-miR-185-5p	XLOC_063297	-0.840278	0.0362294	ENSOCUG00000013996	-0.974349	0.000978544
ocu-miR-185-5p	XLOC_048607	-0.838396	0.0370634	ENSOCUG00000013996	-0.974349	0.000978544
ocu-miR-185-5p	XLOC_061493	-0.825854	0.0428496	ENSOCUG00000013996	-0.974349	0.000978544
ocu-miR-185-5p	XLOC_010497	-0.822809	0.0443132	ENSOCUG00000013996	-0.974349	0.000978544
ocu-miR-142-3p	XLOC_005253	-0.954547	0.00305197	ENSOCUG00000016002	-0.974301	0.000982165
ocu-miR-142-3p	XLOC_061480	-0.820493	0.045442	ENSOCUG00000016002	-0.974301	0.000982165
ocu-miR-421-3p	XLOC_070856	-0.965365	0.00177862	ENSOCUG00000000163	-0.974295	0.000982612
ocu-miR-421-3p	XLOC_013716	-0.878767	0.0211554	ENSOCUG00000000163	-0.974295	0.000982612
ocu-miR-138-5p	XLOC_020771	-0.968101	0.00151013	ENSOCUG00000029308	-0.974282	0.000983652
ocu-miR-138-5p	XLOC_058820	-0.933628	0.00646163	ENSOCUG00000029308	-0.974282	0.000983652
ocu-miR-138-5p	XLOC_066888	-0.933305	0.00652406	ENSOCUG00000029308	-0.974282	0.000983652
ocu-miR-138-5p	XLOC_076894	-0.932173	0.00674481	ENSOCUG00000029308	-0.974282	0.000983652
ocu-miR-138-5p	XLOC_039779	-0.929198	0.00734188	ENSOCUG00000029308	-0.974282	0.000983652
ocu-miR-138-5p	XLOC_065024	-0.925653	0.00808571	ENSOCUG00000029308	-0.974282	0.000983652
ocu-miR-138-5p	XLOC_028030	-0.92077	0.00916744	ENSOCUG00000029308	-0.974282	0.000983652
ocu-miR-138-5p	XLOC_069541	-0.916252	0.0102268	ENSOCUG00000029308	-0.974282	0.000983652
ocu-miR-138-5p	XLOC_050476	-0.911835	0.011317	ENSOCUG00000029308	-0.974282	0.000983652
ocu-miR-138-5p	XLOC_015746	-0.911542	0.0113912	ENSOCUG00000029308	-0.974282	0.000983652
ocu-miR-138-5p	XLOC_069355	-0.907756	0.012371	ENSOCUG00000029308	-0.974282	0.000983652
ocu-miR-138-5p	XLOC_047577	-0.899623	0.0146075	ENSOCUG00000029308	-0.974282	0.000983652
ocu-miR-138-5p	XLOC_030128	-0.895073	0.0159369	ENSOCUG00000029308	-0.974282	0.000983652
ocu-miR-138-5p	XLOC_014687	-0.894855	0.016002	ENSOCUG00000029308	-0.974282	0.000983652
ocu-miR-138-5p	XLOC_024816	-0.889516	0.0176357	ENSOCUG00000029308	-0.974282	0.000983652
ocu-miR-138-5p	XLOC_017389	-0.884003	0.0194024	ENSOCUG00000029308	-0.974282	0.000983652
ocu-miR-138-5p	XLOC_047983	-0.883083	0.0197053	ENSOCUG00000029308	-0.974282	0.000983652
ocu-miR-138-5p	XLOC_011750	-0.882734	0.0198206	ENSOCUG00000029308	-0.974282	0.000983652
ocu-miR-138-5p	XLOC_072915	-0.881988	0.0200686	ENSOCUG00000029308	-0.974282	0.000983652
ocu-miR-138-5p	XLOC_069541	-0.881938	0.0200852	ENSOCUG00000029308	-0.974282	0.000983652
ocu-miR-138-5p	XLOC_007203	-0.880576	0.0205417	ENSOCUG00000029308	-0.974282	0.000983652
ocu-miR-138-5p	XLOC_035968	-0.880354	0.0206164	ENSOCUG00000029308	-0.974282	0.000983652
ocu-miR-138-5p	XLOC_075791	-0.879089	0.0210455	ENSOCUG00000029308	-0.974282	0.000983652
ocu-miR-138-5p	XLOC_057188	-0.877836	0.0214746	ENSOCUG00000029308	-0.974282	0.000983652
ocu-miR-138-5p	XLOC_060100	-0.877574	0.0215647	ENSOCUG00000029308	-0.974282	0.000983652
ocu-miR-138-5p	XLOC_024816	-0.875754	0.0221967	ENSOCUG00000029308	-0.974282	0.000983652
ocu-miR-138-5p	XLOC_047597	-0.87373	0.0229095	ENSOCUG00000029308	-0.974282	0.000983652
ocu-miR-138-5p	XLOC_008325	-0.870216	0.0241729	ENSOCUG00000029308	-0.974282	0.000983652
ocu-miR-138-5p	XLOC_056593	-0.867058	0.0253354	ENSOCUG00000029308	-0.974282	0.000983652
ocu-miR-138-5p	XLOC_069541	-0.865663	0.0258574	ENSOCUG00000029308	-0.974282	0.000983652
ocu-miR-138-5p	XLOC_053871	-0.865556	0.0258977	ENSOCUG00000029308	-0.974282	0.000983652
ocu-miR-138-5p	XLOC_046127	-0.865047	0.0260895	ENSOCUG00000029308	-0.974282	0.000983652
ocu-miR-138-5p	XLOC_065625	-0.864477	0.0263051	ENSOCUG00000029308	-0.974282	0.000983652
ocu-miR-138-5p	XLOC_000180	-0.863678	0.026609	ENSOCUG00000029308	-0.974282	0.000983652
ocu-miR-138-5p	XLOC_073489	-0.863417	0.0267083	ENSOCUG00000029308	-0.974282	0.000983652
ocu-miR-138-5p	XLOC_010965	-0.863092	0.0268328	ENSOCUG00000029308	-0.974282	0.000983652
ocu-miR-138-5p	XLOC_020385	-0.861269	0.0275342	ENSOCUG00000029308	-0.974282	0.000983652
ocu-miR-138-5p	XLOC_009780	-0.860922	0.0276688	ENSOCUG00000029308	-0.974282	0.000983652
ocu-miR-138-5p	XLOC_063944	-0.859937	0.0280527	ENSOCUG00000029308	-0.974282	0.000983652
ocu-miR-138-5p	XLOC_009780	-0.858173	0.028746	ENSOCUG00000029308	-0.974282	0.000983652
ocu-miR-138-5p	XLOC_012209	-0.858171	0.0287468	ENSOCUG00000029308	-0.974282	0.000983652
ocu-miR-138-5p	XLOC_045973	-0.857785	0.0288996	ENSOCUG00000029308	-0.974282	0.000983652
ocu-miR-138-5p	XLOC_044422	-0.857618	0.0289659	ENSOCUG00000029308	-0.974282	0.000983652
ocu-miR-138-5p	XLOC_024947	-0.857596	0.0289744	ENSOCUG00000029308	-0.974282	0.000983652
ocu-miR-138-5p	XLOC_028491	-0.856203	0.0295298	ENSOCUG00000029308	-0.974282	0.000983652
ocu-miR-138-5p	XLOC_052729	-0.85609	0.0295749	ENSOCUG00000029308	-0.974282	0.000983652
ocu-miR-138-5p	XLOC_040116	-0.855691	0.0297351	ENSOCUG00000029308	-0.974282	0.000983652
ocu-miR-138-5p	XLOC_049906	-0.85548	0.0298198	ENSOCUG00000029308	-0.974282	0.000983652
ocu-miR-138-5p	XLOC_051617	-0.85548	0.02982	ENSOCUG00000029308	-0.974282	0.000983652
ocu-miR-138-5p	XLOC_047862	-0.855355	0.02987	ENSOCUG00000029308	-0.974282	0.000983652
ocu-miR-138-5p	XLOC_061007	-0.855328	0.029881	ENSOCUG00000029308	-0.974282	0.000983652
ocu-miR-138-5p	XLOC_061007	-0.85507	0.0299849	ENSOCUG00000029308	-0.974282	0.000983652
ocu-miR-138-5p	XLOC_066722	-0.854785	0.0301	ENSOCUG00000029308	-0.974282	0.000983652
ocu-miR-138-5p	XLOC_065201	-0.854103	0.0303762	ENSOCUG00000029308	-0.974282	0.000983652
ocu-miR-138-5p	XLOC_069210	-0.854042	0.0304008	ENSOCUG00000029308	-0.974282	0.000983652
ocu-miR-138-5p	XLOC_065201	-0.853888	0.0304635	ENSOCUG00000029308	-0.974282	0.000983652
ocu-miR-138-5p	XLOC_039593	-0.853458	0.0306382	ENSOCUG00000029308	-0.974282	0.000983652
ocu-miR-138-5p	XLOC_073215	-0.85312	0.0307764	ENSOCUG00000029308	-0.974282	0.000983652
ocu-miR-138-5p	XLOC_010965	-0.852913	0.0308608	ENSOCUG00000029308	-0.974282	0.000983652
ocu-miR-138-5p	XLOC_049412	-0.852658	0.0309651	ENSOCUG00000029308	-0.974282	0.000983652
ocu-miR-138-5p	XLOC_009039	-0.852395	0.0310727	ENSOCUG00000029308	-0.974282	0.000983652
ocu-miR-138-5p	XLOC_009976	-0.851703	0.0313575	ENSOCUG00000029308	-0.974282	0.000983652
ocu-miR-138-5p	XLOC_065556	-0.851326	0.0315128	ENSOCUG00000029308	-0.974282	0.000983652
ocu-miR-138-5p	XLOC_027382	-0.850885	0.0316952	ENSOCUG00000029308	-0.974282	0.000983652
ocu-miR-138-5p	XLOC_044422	-0.850542	0.0318374	ENSOCUG00000029308	-0.974282	0.000983652
ocu-miR-138-5p	XLOC_020385	-0.848754	0.0325832	ENSOCUG00000029308	-0.974282	0.000983652
ocu-miR-138-5p	XLOC_022126	-0.84869	0.0326098	ENSOCUG00000029308	-0.974282	0.000983652
ocu-miR-138-5p	XLOC_037195	-0.848622	0.0326384	ENSOCUG00000029308	-0.974282	0.000983652
ocu-miR-138-5p	XLOC_063895	-0.847965	0.032915	ENSOCUG00000029308	-0.974282	0.000983652
ocu-miR-138-5p	XLOC_047983	-0.847943	0.032924	ENSOCUG00000029308	-0.974282	0.000983652
ocu-miR-138-5p	XLOC_022075	-0.847644	0.0330503	ENSOCUG00000029308	-0.974282	0.000983652
ocu-miR-138-5p	XLOC_012300	-0.846576	0.0335027	ENSOCUG00000029308	-0.974282	0.000983652
ocu-miR-138-5p	XLOC_017347	-0.846009	0.0337441	ENSOCUG00000029308	-0.974282	0.000983652
ocu-miR-138-5p	XLOC_008833	-0.843691	0.0347393	ENSOCUG00000029308	-0.974282	0.000983652
ocu-miR-138-5p	XLOC_069960	-0.843249	0.0349307	ENSOCUG00000029308	-0.974282	0.000983652
ocu-miR-138-5p	XLOC_009780	-0.843205	0.0349496	ENSOCUG00000029308	-0.974282	0.000983652
ocu-miR-138-5p	XLOC_076872	-0.842689	0.0351735	ENSOCUG00000029308	-0.974282	0.000983652
ocu-miR-138-5p	XLOC_000601	-0.841721	0.0355957	ENSOCUG00000029308	-0.974282	0.000983652
ocu-miR-138-5p	XLOC_049214	-0.841465	0.0357078	ENSOCUG00000029308	-0.974282	0.000983652
ocu-miR-138-5p	XLOC_049430	-0.84106	0.0358854	ENSOCUG00000029308	-0.974282	0.000983652
ocu-miR-138-5p	XLOC_005858	-0.838919	0.0368309	ENSOCUG00000029308	-0.974282	0.000983652
ocu-miR-138-5p	XLOC_024044	-0.838878	0.0368489	ENSOCUG00000029308	-0.974282	0.000983652
ocu-miR-138-5p	XLOC_028715	-0.836914	0.0377268	ENSOCUG00000029308	-0.974282	0.000983652
ocu-miR-138-5p	XLOC_008320	-0.836755	0.0377983	ENSOCUG00000029308	-0.974282	0.000983652
ocu-miR-138-5p	XLOC_006794	-0.836511	0.0379081	ENSOCUG00000029308	-0.974282	0.000983652
ocu-miR-138-5p	XLOC_020385	-0.836155	0.0380686	ENSOCUG00000029308	-0.974282	0.000983652
ocu-miR-138-5p	XLOC_034235	-0.83604	0.0381205	ENSOCUG00000029308	-0.974282	0.000983652
ocu-miR-138-5p	XLOC_011506	-0.835992	0.038142	ENSOCUG00000029308	-0.974282	0.000983652
ocu-miR-138-5p	XLOC_028715	-0.835074	0.0385578	ENSOCUG00000029308	-0.974282	0.000983652
ocu-miR-138-5p	XLOC_023875	-0.833729	0.0391709	ENSOCUG00000029308	-0.974282	0.000983652
ocu-miR-138-5p	XLOC_036283	-0.83359	0.0392345	ENSOCUG00000029308	-0.974282	0.000983652
ocu-miR-138-5p	XLOC_052982	-0.833483	0.0392831	ENSOCUG00000029308	-0.974282	0.000983652
ocu-miR-138-5p	XLOC_057571	-0.833305	0.039365	ENSOCUG00000029308	-0.974282	0.000983652
ocu-miR-138-5p	XLOC_012300	-0.832996	0.0395065	ENSOCUG00000029308	-0.974282	0.000983652
ocu-miR-138-5p	XLOC_039828	-0.832103	0.0399179	ENSOCUG00000029308	-0.974282	0.000983652
ocu-miR-138-5p	XLOC_061006	-0.832065	0.039935	ENSOCUG00000029308	-0.974282	0.000983652
ocu-miR-138-5p	XLOC_051335	-0.831653	0.0401254	ENSOCUG00000029308	-0.974282	0.000983652
ocu-miR-138-5p	XLOC_010604	-0.829761	0.041005	ENSOCUG00000029308	-0.974282	0.000983652
ocu-miR-138-5p	XLOC_005858	-0.826508	0.0425383	ENSOCUG00000029308	-0.974282	0.000983652
ocu-miR-138-5p	XLOC_056387	-0.82613	0.0427181	ENSOCUG00000029308	-0.974282	0.000983652
ocu-miR-138-5p	XLOC_065428	-0.82605	0.0427563	ENSOCUG00000029308	-0.974282	0.000983652
ocu-miR-138-5p	XLOC_051968	-0.825865	0.0428445	ENSOCUG00000029308	-0.974282	0.000983652
ocu-miR-138-5p	XLOC_028030	-0.825316	0.0431065	ENSOCUG00000029308	-0.974282	0.000983652
ocu-miR-138-5p	XLOC_062893	-0.823643	0.0439103	ENSOCUG00000029308	-0.974282	0.000983652
ocu-miR-138-5p	XLOC_017205	-0.822123	0.0446464	ENSOCUG00000029308	-0.974282	0.000983652
ocu-miR-138-5p	XLOC_015763	-0.820944	0.0452213	ENSOCUG00000029308	-0.974282	0.000983652
ocu-miR-138-5p	XLOC_075851	-0.819716	0.0458238	ENSOCUG00000029308	-0.974282	0.000983652
ocu-miR-138-5p	XLOC_057325	-0.816396	0.0474712	ENSOCUG00000029308	-0.974282	0.000983652
ocu-miR-138-5p	XLOC_056275	-0.813622	0.0488678	ENSOCUG00000029308	-0.974282	0.000983652
ocu-miR-138-5p	XLOC_021856	-0.813121	0.0491222	ENSOCUG00000029308	-0.974282	0.000983652
ocu-miR-138-5p	XLOC_055394	-0.812556	0.0494101	ENSOCUG00000029308	-0.974282	0.000983652
ocu-miR-148a-5p	XLOC_038081	-0.874396	0.0226737	ENSOCUG00000016221	-0.974061	0.00100053
ocu-miR-148a-5p	XLOC_018111	-0.861484	0.0274511	ENSOCUG00000016221	-0.974061	0.00100053
ocu-miR-148a-5p	XLOC_073502	-0.844035	0.0345908	ENSOCUG00000016221	-0.974061	0.00100053
ocu-miR-148a-5p	XLOC_030906	-0.842621	0.0352031	ENSOCUG00000016221	-0.974061	0.00100053
ocu-miR-148a-5p	XLOC_050476	-0.831188	0.040341	ENSOCUG00000016221	-0.974061	0.00100053
ocu-miR-148a-5p	XLOC_016645	-0.830253	0.0407756	ENSOCUG00000016221	-0.974061	0.00100053
ocu-miR-148a-5p	XLOC_030906	-0.822051	0.0446814	ENSOCUG00000016221	-0.974061	0.00100053
ocu-miR-30e-5p	XLOC_070856	-0.927909	0.00760824	ENSOCUG00000016002	-0.974049	0.00100143
ocu-miR-30e-5p	XLOC_061480	-0.906218	0.0127802	ENSOCUG00000016002	-0.974049	0.00100143
ocu-miR-30e-5p	XLOC_069717	-0.867606	0.0251318	ENSOCUG00000016002	-0.974049	0.00100143
ocu-miR-30e-5p	XLOC_052285	-0.860539	0.027818	ENSOCUG00000016002	-0.974049	0.00100143
ocu-miR-30e-5p	XLOC_060914	-0.835956	0.0381584	ENSOCUG00000016002	-0.974049	0.00100143
ocu-miR-128b-5p	XLOC_070856	-0.966452	0.00166937	ENSOCUG00000007211	-0.973955	0.0010087
ocu-miR-128b-5p	XLOC_005253	-0.960499	0.00230964	ENSOCUG00000007211	-0.973955	0.0010087
ocu-miR-128b-5p	XLOC_060914	-0.846896	0.033367	ENSOCUG00000007211	-0.973955	0.0010087
ocu-miR-128b-5p	XLOC_055203	-0.845959	0.0337652	ENSOCUG00000007211	-0.973955	0.0010087
ocu-miR-128b-5p	XLOC_055875	-0.824031	0.0437231	ENSOCUG00000007211	-0.973955	0.0010087
ocu-miR-128b-5p	XLOC_015331	-0.81424	0.0485549	ENSOCUG00000007211	-0.973955	0.0010087
ocu-miR-378-3p	XLOC_048321	-0.908729	0.0121155	ENSOCUG00000016606	-0.973951	0.001009
ocu-miR-378-3p	XLOC_069717	-0.889468	0.0176508	ENSOCUG00000016606	-0.973951	0.001009
ocu-miR-378-3p	XLOC_055203	-0.820599	0.04539	ENSOCUG00000016606	-0.973951	0.001009
ocu-miR-324-5p	XLOC_064183	-0.927925	0.00760505	ENSOCUG00000029183	-0.973873	0.001015
ocu-miR-324-5p	XLOC_073502	-0.901209	0.0141573	ENSOCUG00000029183	-0.973873	0.001015
ocu-miR-324-5p	XLOC_017511	-0.864486	0.0263019	ENSOCUG00000029183	-0.973873	0.001015
ocu-miR-324-5p	XLOC_047308	-0.862963	0.0268821	ENSOCUG00000029183	-0.973873	0.001015
ocu-miR-324-5p	XLOC_024725	-0.85762	0.0289649	ENSOCUG00000029183	-0.973873	0.001015
ocu-miR-324-5p	XLOC_059629	-0.856829	0.0292797	ENSOCUG00000029183	-0.973873	0.001015
ocu-miR-324-5p	XLOC_021017	-0.826873	0.0423651	ENSOCUG00000029183	-0.973873	0.001015
ocu-miR-324-5p	XLOC_052285	-0.816081	0.0476285	ENSOCUG00000029183	-0.973873	0.001015
ocu-miR-449a-5p	XLOC_073275	-0.903942	0.0133976	ENSOCUG00000029529	-0.973757	0.001024
ocu-miR-449a-5p	XLOC_050476	-0.888607	0.0179216	ENSOCUG00000029529	-0.973757	0.001024
ocu-miR-449a-5p	XLOC_070374	-0.887582	0.0182464	ENSOCUG00000029529	-0.973757	0.001024
ocu-miR-221-5p	XLOC_015828	-0.937436	0.00574901	ENSOCUG00000007569	-0.973736	0.00102562
ocu-miR-221-5p	XLOC_066879	-0.930559	0.00706566	ENSOCUG00000007569	-0.973736	0.00102562
ocu-miR-221-5p	XLOC_030906	-0.912053	0.011262	ENSOCUG00000007569	-0.973736	0.00102562
ocu-miR-221-5p	XLOC_040008	-0.90348	0.0135245	ENSOCUG00000007569	-0.973736	0.00102562
ocu-miR-221-5p	XLOC_021052	-0.892622	0.0166759	ENSOCUG00000007569	-0.973736	0.00102562
ocu-miR-221-5p	XLOC_055203	-0.867628	0.0251238	ENSOCUG00000007569	-0.973736	0.00102562
ocu-miR-221-5p	XLOC_046675	-0.859344	0.0282846	ENSOCUG00000007569	-0.973736	0.00102562
ocu-miR-221-5p	XLOC_028737	-0.852259	0.0311285	ENSOCUG00000007569	-0.973736	0.00102562
ocu-miR-221-5p	XLOC_067302	-0.842137	0.0354139	ENSOCUG00000007569	-0.973736	0.00102562
ocu-miR-191-3p	XLOC_005253	-0.979536	0.000623888	ENSOCUG00000014993	-0.973727	0.00102633
ocu-miR-152-3p	XLOC_065024	-0.88565	0.0188664	ENSOCUG00000009833	-0.973725	0.00102648
ocu-miR-152-3p	XLOC_071062	-0.839423	0.0366072	ENSOCUG00000009833	-0.973725	0.00102648
ocu-miR-152-3p	XLOC_002773	-0.836516	0.0379059	ENSOCUG00000009833	-0.973725	0.00102648
ocu-miR-152-3p	XLOC_062986	-0.835796	0.0382307	ENSOCUG00000009833	-0.973725	0.00102648
ocu-miR-152-3p	XLOC_073674	-0.830696	0.0405694	ENSOCUG00000009833	-0.973725	0.00102648
ocu-miR-152-3p	XLOC_047983	-0.821691	0.0448568	ENSOCUG00000009833	-0.973725	0.00102648
ocu-miR-128a-3p	XLOC_070856	-0.966824	0.0016327	ENSOCUG00000012633	-0.973688	0.00102941
ocu-miR-128a-3p	XLOC_069717	-0.8938	0.0163189	ENSOCUG00000012633	-0.973688	0.00102941
ocu-miR-128a-3p	XLOC_052285	-0.863156	0.0268081	ENSOCUG00000012633	-0.973688	0.00102941
ocu-miR-128a-3p	XLOC_048321	-0.853101	0.030784	ENSOCUG00000012633	-0.973688	0.00102941
ocu-miR-128a-3p	XLOC_027918	-0.842394	0.0353022	ENSOCUG00000012633	-0.973688	0.00102941
ocu-miR-128a-3p	XLOC_055203	-0.841438	0.0357197	ENSOCUG00000012633	-0.973688	0.00102941
ocu-miR-128a-3p	XLOC_013838	-0.811681	0.0498568	ENSOCUG00000012633	-0.973688	0.00102941
ocu-miR-18a-3p	XLOC_069717	-0.864407	0.0263318	ENSOCUG00000010173	-0.973666	0.0010311
ocu-miR-18a-3p	XLOC_013482	-0.863771	0.0265734	ENSOCUG00000010173	-0.973666	0.0010311
ocu-miR-18a-3p	XLOC_071077	-0.811591	0.0499031	ENSOCUG00000010173	-0.973666	0.0010311
ocu-miR-30d-5p	XLOC_055203	-0.986691	0.0002645	ENSOCUG00000008424	-0.973532	0.00104152
ocu-miR-30d-5p	XLOC_052285	-0.932024	0.00677399	ENSOCUG00000008424	-0.973532	0.00104152
ocu-miR-30d-5p	XLOC_021052	-0.87669	0.0218704	ENSOCUG00000008424	-0.973532	0.00104152
ocu-miR-324-3p	XLOC_052285	-0.986484	0.000272805	ENSOCUG00000010372	-0.973429	0.00104967
ocu-miR-324-3p	XLOC_058334	-0.88	0.0207359	ENSOCUG00000010372	-0.973429	0.00104967
ocu-miR-324-3p	XLOC_052494	-0.854751	0.0301138	ENSOCUG00000010372	-0.973429	0.00104967
ocu-miR-324-3p	XLOC_069317	-0.831904	0.0400093	ENSOCUG00000010372	-0.973429	0.00104967
ocu-miR-324-3p	XLOC_015331	-0.812247	0.0495673	ENSOCUG00000010372	-0.973429	0.00104967
ocu-miR-421-3p	XLOC_070856	-0.965365	0.00177862	ENSOCUG00000005929	-0.973412	0.00105095
ocu-miR-421-3p	XLOC_013716	-0.878767	0.0211554	ENSOCUG00000005929	-0.973412	0.00105095
ocu-miR-504-5p	XLOC_072383	-0.932328	0.00671434	ENSOCUG00000014107	-0.973355	0.00105544
ocu-miR-504-5p	XLOC_053520	-0.890742	0.0172539	ENSOCUG00000014107	-0.973355	0.00105544
ocu-miR-504-5p	XLOC_058611	-0.878275	0.0213235	ENSOCUG00000014107	-0.973355	0.00105544
ocu-miR-504-5p	XLOC_028577	-0.855544	0.0297939	ENSOCUG00000014107	-0.973355	0.00105544
ocu-miR-504-5p	XLOC_058523	-0.82822	0.0417283	ENSOCUG00000014107	-0.973355	0.00105544
ocu-miR-504-5p	XLOC_013302	-0.823769	0.0438492	ENSOCUG00000014107	-0.973355	0.00105544
ocu-miR-504-5p	XLOC_063387	-0.82277	0.0443324	ENSOCUG00000014107	-0.973355	0.00105544
ocu-miR-504-5p	XLOC_041556	-0.817255	0.0470423	ENSOCUG00000014107	-0.973355	0.00105544
ocu-miR-504-5p	XLOC_028715	-0.816838	0.0472501	ENSOCUG00000014107	-0.973355	0.00105544
ocu-miR-504-5p	XLOC_066722	-0.81268	0.0493468	ENSOCUG00000014107	-0.973355	0.00105544
ocu-miR-30e-3p	XLOC_070856	-0.982748	0.000443872	ENSOCUG00000013185	-0.973351	0.00105582
ocu-miR-30e-3p	XLOC_037590	-0.91254	0.0111394	ENSOCUG00000013185	-0.973351	0.00105582
ocu-miR-30e-3p	XLOC_060914	-0.862465	0.0270732	ENSOCUG00000013185	-0.973351	0.00105582
ocu-miR-30e-3p	XLOC_038340	-0.849965	0.0320772	ENSOCUG00000013185	-0.973351	0.00105582
ocu-miR-30e-3p	XLOC_045965	-0.812267	0.0495574	ENSOCUG00000013185	-0.973351	0.00105582
novel_233	XLOC_070856	-0.970663	0.00127838	ENSOCUG00000013133	-0.973329	0.00105756
novel_233	XLOC_069717	-0.904419	0.0132669	ENSOCUG00000013133	-0.973329	0.00105756
novel_233	XLOC_055203	-0.861879	0.0272988	ENSOCUG00000013133	-0.973329	0.00105756
novel_233	XLOC_061480	-0.820568	0.0454055	ENSOCUG00000013133	-0.973329	0.00105756
ocu-miR-141-3p	XLOC_069717	-0.883578	0.0195422	ENSOCUG00000012633	-0.973305	0.00105943
ocu-miR-141-3p	XLOC_052285	-0.875461	0.0222993	ENSOCUG00000012633	-0.973305	0.00105943
ocu-miR-141-3p	XLOC_027918	-0.836904	0.0377314	ENSOCUG00000012633	-0.973305	0.00105943
ocu-miR-423-5p	XLOC_070856	-0.925975	0.00801665	ENSOCUG00000016641	-0.97311	0.0010749
ocu-miR-423-5p	XLOC_006528	-0.904819	0.013158	ENSOCUG00000016641	-0.97311	0.0010749
ocu-miR-423-5p	XLOC_040494	-0.884102	0.0193702	ENSOCUG00000016641	-0.97311	0.0010749
ocu-miR-423-5p	XLOC_013482	-0.864242	0.0263942	ENSOCUG00000016641	-0.97311	0.0010749
ocu-miR-423-5p	XLOC_034223	-0.86299	0.0268715	ENSOCUG00000016641	-0.97311	0.0010749
ocu-miR-423-5p	XLOC_015737	-0.858863	0.0284738	ENSOCUG00000016641	-0.97311	0.0010749
ocu-miR-423-5p	XLOC_072277	-0.827545	0.0420466	ENSOCUG00000016641	-0.97311	0.0010749
ocu-miR-423-5p	XLOC_020404	-0.81657	0.0473841	ENSOCUG00000016641	-0.97311	0.0010749
novel_122	XLOC_028680	-0.822037	0.0446883	ENSOCUG00000012276	-0.973019	0.00108214
ocu-miR-185-3p	XLOC_066658	-0.928236	0.00754023	ENSOCUG00000027474	-0.973005	0.00108328
ocu-miR-185-3p	XLOC_025346	-0.89677	0.0154347	ENSOCUG00000027474	-0.973005	0.00108328
ocu-miR-185-3p	XLOC_040494	-0.885277	0.0189872	ENSOCUG00000027474	-0.973005	0.00108328
ocu-miR-185-3p	XLOC_015737	-0.875587	0.0222551	ENSOCUG00000027474	-0.973005	0.00108328
ocu-miR-185-3p	XLOC_013910	-0.873362	0.0230402	ENSOCUG00000027474	-0.973005	0.00108328
ocu-miR-185-3p	XLOC_061480	-0.857699	0.0289336	ENSOCUG00000027474	-0.973005	0.00108328
ocu-miR-185-3p	XLOC_040494	-0.816567	0.0473856	ENSOCUG00000027474	-0.973005	0.00108328
ocu-miR-376a-5p	XLOC_039828	-0.841088	0.0358729	ENSOCUG00000005919	-0.972984	0.00108492
ocu-miR-361-3p	XLOC_046764	-0.933166	0.00655089	ENSOCUG00000000049	-0.972763	0.00110266
ocu-miR-361-3p	XLOC_037416	-0.85425	0.0303164	ENSOCUG00000000049	-0.972763	0.00110266
ocu-miR-361-3p	XLOC_024108	-0.821751	0.0448272	ENSOCUG00000000049	-0.972763	0.00110266
ocu-miR-361-3p	XLOC_030118	-0.812973	0.0491974	ENSOCUG00000000049	-0.972763	0.00110266
ocu-miR-378-3p	XLOC_048321	-0.908729	0.0121155	ENSOCUG00000000163	-0.972759	0.00110297
ocu-miR-378-3p	XLOC_069717	-0.889468	0.0176508	ENSOCUG00000000163	-0.972759	0.00110297
ocu-miR-378-3p	XLOC_055203	-0.820599	0.04539	ENSOCUG00000000163	-0.972759	0.00110297
ocu-miR-324-3p	XLOC_052285	-0.986484	0.000272805	ENSOCUG00000007959	-0.972752	0.00110355
ocu-miR-324-3p	XLOC_058334	-0.88	0.0207359	ENSOCUG00000007959	-0.972752	0.00110355
ocu-miR-324-3p	XLOC_052494	-0.854751	0.0301138	ENSOCUG00000007959	-0.972752	0.00110355
ocu-miR-324-3p	XLOC_069317	-0.831904	0.0400093	ENSOCUG00000007959	-0.972752	0.00110355
ocu-miR-324-3p	XLOC_015331	-0.812247	0.0495673	ENSOCUG00000007959	-0.972752	0.00110355
ocu-miR-20a-5p	XLOC_005253	-0.956391	0.00281116	ENSOCUG00000007211	-0.972724	0.00110586
ocu-miR-20a-5p	XLOC_069717	-0.883813	0.0194648	ENSOCUG00000007211	-0.972724	0.00110586
ocu-miR-20a-5p	XLOC_055203	-0.858516	0.0286103	ENSOCUG00000007211	-0.972724	0.00110586
ocu-miR-20a-5p	XLOC_053429	-0.846051	0.0337263	ENSOCUG00000007211	-0.972724	0.00110586
ocu-miR-350-3p	XLOC_021052	-0.865143	0.0260535	ENSOCUG00000021290	-0.972722	0.00110601
ocu-miR-350-3p	XLOC_073875	-0.813346	0.0490083	ENSOCUG00000021290	-0.972722	0.00110601
ocu-miR-153-3p	XLOC_052285	-0.910585	0.0116352	ENSOCUG00000007339	-0.972695	0.00110815
ocu-miR-153-3p	XLOC_021459	-0.868624	0.0247559	ENSOCUG00000007339	-0.972695	0.00110815
ocu-miR-153-3p	XLOC_014121	-0.859865	0.0280807	ENSOCUG00000007339	-0.972695	0.00110815
ocu-miR-23b-3p	XLOC_056075	-0.898373	0.0149673	ENSOCUG00000017650	-0.972599	0.00111594
ocu-miR-23b-3p	XLOC_058059	-0.892585	0.0166873	ENSOCUG00000017650	-0.972599	0.00111594
ocu-miR-23b-3p	XLOC_062893	-0.887056	0.0184141	ENSOCUG00000017650	-0.972599	0.00111594
ocu-miR-23b-3p	XLOC_020784	-0.885461	0.0189273	ENSOCUG00000017650	-0.972599	0.00111594
ocu-miR-23b-3p	XLOC_057188	-0.884131	0.0193606	ENSOCUG00000017650	-0.972599	0.00111594
ocu-miR-23b-3p	XLOC_062861	-0.881284	0.0203037	ENSOCUG00000017650	-0.972599	0.00111594
ocu-miR-23b-3p	XLOC_004037	-0.880633	0.0205224	ENSOCUG00000017650	-0.972599	0.00111594
ocu-miR-23b-3p	XLOC_053499	-0.880297	0.0206355	ENSOCUG00000017650	-0.972599	0.00111594
ocu-miR-23b-3p	XLOC_066722	-0.877624	0.0215475	ENSOCUG00000017650	-0.972599	0.00111594
ocu-miR-23b-3p	XLOC_020771	-0.877195	0.0216956	ENSOCUG00000017650	-0.972599	0.00111594
ocu-miR-23b-3p	XLOC_038340	-0.876955	0.0217785	ENSOCUG00000017650	-0.972599	0.00111594
ocu-miR-23b-3p	XLOC_062997	-0.870402	0.0241053	ENSOCUG00000017650	-0.972599	0.00111594
ocu-miR-23b-3p	XLOC_014307	-0.864071	0.0264591	ENSOCUG00000017650	-0.972599	0.00111594
ocu-miR-23b-3p	XLOC_017157	-0.863614	0.0266332	ENSOCUG00000017650	-0.972599	0.00111594
ocu-miR-23b-3p	XLOC_056075	-0.86208	0.027221	ENSOCUG00000017650	-0.972599	0.00111594
ocu-miR-23b-3p	XLOC_037129	-0.861102	0.0275991	ENSOCUG00000017650	-0.972599	0.00111594
ocu-miR-23b-3p	XLOC_065625	-0.860698	0.027756	ENSOCUG00000017650	-0.972599	0.00111594
ocu-miR-23b-3p	XLOC_010756	-0.85773	0.0289211	ENSOCUG00000017650	-0.972599	0.00111594
ocu-miR-23b-3p	XLOC_038877	-0.857076	0.0291812	ENSOCUG00000017650	-0.972599	0.00111594
ocu-miR-23b-3p	XLOC_051424	-0.854846	0.0300754	ENSOCUG00000017650	-0.972599	0.00111594
ocu-miR-23b-3p	XLOC_047577	-0.851901	0.031276	ENSOCUG00000017650	-0.972599	0.00111594
ocu-miR-23b-3p	XLOC_035834	-0.850413	0.0318907	ENSOCUG00000017650	-0.972599	0.00111594
ocu-miR-23b-3p	XLOC_015763	-0.845766	0.0338478	ENSOCUG00000017650	-0.972599	0.00111594
ocu-miR-23b-3p	XLOC_048723	-0.845601	0.0339181	ENSOCUG00000017650	-0.972599	0.00111594
ocu-miR-23b-3p	XLOC_004699	-0.843801	0.0346918	ENSOCUG00000017650	-0.972599	0.00111594
ocu-miR-23b-3p	XLOC_049214	-0.84204	0.0354563	ENSOCUG00000017650	-0.972599	0.00111594
ocu-miR-23b-3p	XLOC_027804	-0.842009	0.0354699	ENSOCUG00000017650	-0.972599	0.00111594
ocu-miR-23b-3p	XLOC_059754	-0.83836	0.0370797	ENSOCUG00000017650	-0.972599	0.00111594
ocu-miR-23b-3p	XLOC_052233	-0.835607	0.0383163	ENSOCUG00000017650	-0.972599	0.00111594
ocu-miR-23b-3p	XLOC_008325	-0.832618	0.0396803	ENSOCUG00000017650	-0.972599	0.00111594
ocu-miR-23b-3p	XLOC_005995	-0.831798	0.0400584	ENSOCUG00000017650	-0.972599	0.00111594
ocu-miR-23b-3p	XLOC_015839	-0.830609	0.0406098	ENSOCUG00000017650	-0.972599	0.00111594
ocu-miR-23b-3p	XLOC_053871	-0.830504	0.0406587	ENSOCUG00000017650	-0.972599	0.00111594
ocu-miR-23b-3p	XLOC_044490	-0.829398	0.0411749	ENSOCUG00000017650	-0.972599	0.00111594
ocu-miR-23b-3p	XLOC_048275	-0.825697	0.0429246	ENSOCUG00000017650	-0.972599	0.00111594
ocu-miR-23b-3p	XLOC_003039	-0.82352	0.0439694	ENSOCUG00000017650	-0.972599	0.00111594
ocu-miR-23b-3p	XLOC_009232	-0.821557	0.044922	ENSOCUG00000017650	-0.972599	0.00111594
ocu-miR-23b-3p	XLOC_024947	-0.820836	0.0452742	ENSOCUG00000017650	-0.972599	0.00111594
ocu-miR-23b-3p	XLOC_050473	-0.820089	0.0456404	ENSOCUG00000017650	-0.972599	0.00111594
ocu-miR-23b-3p	XLOC_050089	-0.819869	0.0457485	ENSOCUG00000017650	-0.972599	0.00111594
ocu-miR-23b-3p	XLOC_049412	-0.818476	0.0464358	ENSOCUG00000017650	-0.972599	0.00111594
ocu-miR-23b-3p	XLOC_064457	-0.817891	0.0467259	ENSOCUG00000017650	-0.972599	0.00111594
ocu-miR-23b-3p	XLOC_069541	-0.814846	0.0482491	ENSOCUG00000017650	-0.972599	0.00111594
ocu-miR-23b-3p	XLOC_010604	-0.814574	0.0483865	ENSOCUG00000017650	-0.972599	0.00111594
ocu-miR-23b-3p	XLOC_053607	-0.813609	0.0488745	ENSOCUG00000017650	-0.972599	0.00111594
ocu-miR-23b-3p	XLOC_074819	-0.812904	0.049233	ENSOCUG00000017650	-0.972599	0.00111594
ocu-miR-23b-3p	XLOC_056420	-0.811965	0.0497117	ENSOCUG00000017650	-0.972599	0.00111594
ocu-miR-23b-3p	XLOC_010536	-0.811777	0.0498076	ENSOCUG00000017650	-0.972599	0.00111594
ocu-miR-671-5p	XLOC_061480	-0.938204	0.00561008	ENSOCUG00000005369	-0.972509	0.00112323
ocu-miR-671-5p	XLOC_070856	-0.917661	0.00989053	ENSOCUG00000005369	-0.972509	0.00112323
ocu-miR-671-5p	XLOC_047114	-0.852211	0.0311483	ENSOCUG00000005369	-0.972509	0.00112323
ocu-miR-671-5p	XLOC_069717	-0.83249	0.0397392	ENSOCUG00000005369	-0.972509	0.00112323
ocu-miR-185-5p	XLOC_034223	-0.904242	0.0133152	ENSOCUG00000012883	-0.972298	0.00114044
ocu-miR-185-5p	XLOC_035023	-0.90363	0.0134832	ENSOCUG00000012883	-0.972298	0.00114044
ocu-miR-185-5p	XLOC_010627	-0.88118	0.0203387	ENSOCUG00000012883	-0.972298	0.00114044
ocu-miR-185-5p	XLOC_062719	-0.879786	0.0208086	ENSOCUG00000012883	-0.972298	0.00114044
ocu-miR-185-5p	XLOC_013716	-0.872101	0.0234912	ENSOCUG00000012883	-0.972298	0.00114044
ocu-miR-185-5p	XLOC_063297	-0.840278	0.0362294	ENSOCUG00000012883	-0.972298	0.00114044
ocu-miR-185-5p	XLOC_048607	-0.838396	0.0370634	ENSOCUG00000012883	-0.972298	0.00114044
ocu-miR-185-5p	XLOC_061493	-0.825854	0.0428496	ENSOCUG00000012883	-0.972298	0.00114044
ocu-miR-185-5p	XLOC_010497	-0.822809	0.0443132	ENSOCUG00000012883	-0.972298	0.00114044
ocu-miR-17-3p	XLOC_055875	-0.990094	0.00014671	ENSOCUG00000001136	-0.97227	0.0011428
ocu-miR-17-3p	XLOC_027918	-0.956178	0.00283846	ENSOCUG00000001136	-0.97227	0.0011428
ocu-miR-17-3p	XLOC_068118	-0.942797	0.0048147	ENSOCUG00000001136	-0.97227	0.0011428
ocu-miR-17-3p	XLOC_069717	-0.931169	0.00694345	ENSOCUG00000001136	-0.97227	0.0011428
ocu-miR-17-3p	XLOC_077052	-0.907004	0.0125701	ENSOCUG00000001136	-0.97227	0.0011428
ocu-miR-17-3p	XLOC_070856	-0.90353	0.0135107	ENSOCUG00000001136	-0.97227	0.0011428
ocu-miR-17-3p	XLOC_072277	-0.892917	0.0165861	ENSOCUG00000001136	-0.97227	0.0011428
ocu-miR-17-3p	XLOC_013838	-0.872295	0.0234216	ENSOCUG00000001136	-0.97227	0.0011428
ocu-miR-17-3p	XLOC_015150	-0.856918	0.029244	ENSOCUG00000001136	-0.97227	0.0011428
ocu-miR-17-3p	XLOC_013786	-0.84656	0.0335095	ENSOCUG00000001136	-0.97227	0.0011428
ocu-miR-17-3p	XLOC_009948	-0.82133	0.0450327	ENSOCUG00000001136	-0.97227	0.0011428
ocu-miR-17-3p	XLOC_074522	-0.819535	0.045913	ENSOCUG00000001136	-0.97227	0.0011428
ocu-miR-17-3p	XLOC_061480	-0.818724	0.046313	ENSOCUG00000001136	-0.97227	0.0011428
ocu-miR-378-3p	XLOC_048321	-0.908729	0.0121155	ENSOCUG00000009655	-0.972058	0.00116025
ocu-miR-378-3p	XLOC_069717	-0.889468	0.0176508	ENSOCUG00000009655	-0.972058	0.00116025
ocu-miR-378-3p	XLOC_055203	-0.820599	0.04539	ENSOCUG00000009655	-0.972058	0.00116025
ocu-miR-205-5p	XLOC_069717	-0.896029	0.0156529	ENSOCUG00000012457	-0.97196	0.00116833
ocu-miR-205-5p	XLOC_053429	-0.836072	0.0381062	ENSOCUG00000012457	-0.97196	0.00116833
ocu-miR-205-5p	XLOC_055875	-0.826901	0.0423518	ENSOCUG00000012457	-0.97196	0.00116833
ocu-miR-582-3p	XLOC_055203	-0.928815	0.00742062	ENSOCUG00000015532	-0.971927	0.00117105
ocu-miR-30c-3p	XLOC_045965	-0.906911	0.012595	ENSOCUG00000000227	-0.971788	0.00118267
ocu-miR-30c-3p	XLOC_055203	-0.873095	0.0231356	ENSOCUG00000000227	-0.971788	0.00118267
ocu-miR-324-3p	XLOC_052285	-0.986484	0.000272805	ENSOCUG00000003513	-0.971774	0.00118385
ocu-miR-324-3p	XLOC_058334	-0.88	0.0207359	ENSOCUG00000003513	-0.971774	0.00118385
ocu-miR-324-3p	XLOC_052494	-0.854751	0.0301138	ENSOCUG00000003513	-0.971774	0.00118385
ocu-miR-324-3p	XLOC_069317	-0.831904	0.0400093	ENSOCUG00000003513	-0.971774	0.00118385
ocu-miR-324-3p	XLOC_015331	-0.812247	0.0495673	ENSOCUG00000003513	-0.971774	0.00118385
ocu-miR-652-5p	XLOC_052285	-0.815138	0.0481024	ENSOCUG00000016267	-0.971737	0.00118693
ocu-miR-138-3p	XLOC_009606	-0.985829	0.000299804	ENSOCUG00000000557	-0.971691	0.00119075
ocu-miR-138-3p	XLOC_063387	-0.974519	0.000965628	ENSOCUG00000000557	-0.971691	0.00119075
ocu-miR-138-3p	XLOC_072383	-0.965475	0.00176735	ENSOCUG00000000557	-0.971691	0.00119075
ocu-miR-138-3p	XLOC_061708	-0.964454	0.00187279	ENSOCUG00000000557	-0.971691	0.00119075
ocu-miR-138-3p	XLOC_066722	-0.959324	0.00244811	ENSOCUG00000000557	-0.971691	0.00119075
ocu-miR-138-3p	XLOC_048275	-0.953616	0.00317725	ENSOCUG00000000557	-0.971691	0.00119075
ocu-miR-138-3p	XLOC_024127	-0.951405	0.00348479	ENSOCUG00000000557	-0.971691	0.00119075
ocu-miR-138-3p	XLOC_006130	-0.947694	0.00403239	ENSOCUG00000000557	-0.971691	0.00119075
ocu-miR-138-3p	XLOC_013862	-0.939778	0.0053309	ENSOCUG00000000557	-0.971691	0.00119075
ocu-miR-138-3p	XLOC_044210	-0.935304	0.00614288	ENSOCUG00000000557	-0.971691	0.00119075
ocu-miR-138-3p	XLOC_014980	-0.932314	0.00671701	ENSOCUG00000000557	-0.971691	0.00119075
ocu-miR-138-3p	XLOC_014687	-0.930522	0.00707314	ENSOCUG00000000557	-0.971691	0.00119075
ocu-miR-138-3p	XLOC_014213	-0.929625	0.00725474	ENSOCUG00000000557	-0.971691	0.00119075
ocu-miR-138-3p	XLOC_050476	-0.928359	0.00751471	ENSOCUG00000000557	-0.971691	0.00119075
ocu-miR-138-3p	XLOC_008833	-0.925373	0.00814608	ENSOCUG00000000557	-0.971691	0.00119075
ocu-miR-138-3p	XLOC_034235	-0.92428	0.00838315	ENSOCUG00000000557	-0.971691	0.00119075
ocu-miR-138-3p	XLOC_062893	-0.918006	0.00980879	ENSOCUG00000000557	-0.971691	0.00119075
ocu-miR-138-3p	XLOC_076872	-0.916144	0.0102529	ENSOCUG00000000557	-0.971691	0.00119075
ocu-miR-138-3p	XLOC_029150	-0.910275	0.0117147	ENSOCUG00000000557	-0.971691	0.00119075
ocu-miR-138-3p	XLOC_076872	-0.907214	0.0125144	ENSOCUG00000000557	-0.971691	0.00119075
ocu-miR-138-3p	XLOC_023883	-0.906422	0.0127256	ENSOCUG00000000557	-0.971691	0.00119075
ocu-miR-138-3p	XLOC_028787	-0.897184	0.0153133	ENSOCUG00000000557	-0.971691	0.00119075
ocu-miR-138-3p	XLOC_053520	-0.887697	0.0182097	ENSOCUG00000000557	-0.971691	0.00119075
ocu-miR-138-3p	XLOC_024312	-0.885822	0.0188106	ENSOCUG00000000557	-0.971691	0.00119075
ocu-miR-138-3p	XLOC_069760	-0.884257	0.0193194	ENSOCUG00000000557	-0.971691	0.00119075
ocu-miR-138-3p	XLOC_052982	-0.872912	0.0232008	ENSOCUG00000000557	-0.971691	0.00119075
ocu-miR-138-3p	XLOC_062997	-0.86991	0.0242842	ENSOCUG00000000557	-0.971691	0.00119075
ocu-miR-138-3p	XLOC_022135	-0.860314	0.0279055	ENSOCUG00000000557	-0.971691	0.00119075
ocu-miR-138-3p	XLOC_067311	-0.856013	0.0296056	ENSOCUG00000000557	-0.971691	0.00119075
ocu-miR-138-3p	XLOC_057299	-0.851111	0.0316016	ENSOCUG00000000557	-0.971691	0.00119075
ocu-miR-138-3p	XLOC_071960	-0.839175	0.036717	ENSOCUG00000000557	-0.971691	0.00119075
ocu-miR-138-3p	XLOC_039075	-0.829173	0.0412804	ENSOCUG00000000557	-0.971691	0.00119075
ocu-miR-138-3p	XLOC_066888	-0.826008	0.0427763	ENSOCUG00000000557	-0.971691	0.00119075
ocu-miR-138-3p	XLOC_033505	-0.822463	0.0444813	ENSOCUG00000000557	-0.971691	0.00119075
ocu-miR-138-3p	XLOC_019793	-0.82194	0.0447352	ENSOCUG00000000557	-0.971691	0.00119075
ocu-miR-138-3p	XLOC_028715	-0.82097	0.0452087	ENSOCUG00000000557	-0.971691	0.00119075
ocu-miR-138-3p	XLOC_058523	-0.81697	0.0471845	ENSOCUG00000000557	-0.971691	0.00119075
ocu-miR-138-3p	XLOC_031456	-0.814065	0.0486438	ENSOCUG00000000557	-0.971691	0.00119075
ocu-miR-138-3p	XLOC_070876	-0.813508	0.048926	ENSOCUG00000000557	-0.971691	0.00119075
ocu-miR-138-3p	XLOC_022364	-0.812981	0.0491936	ENSOCUG00000000557	-0.971691	0.00119075
ocu-miR-3059-5p	XLOC_060135	-0.834366	0.03888	ENSOCUG00000007699	-0.971612	0.00119735
ocu-miR-18a-3p	XLOC_069717	-0.864407	0.0263318	ENSOCUG00000005579	-0.971516	0.00120544
ocu-miR-18a-3p	XLOC_013482	-0.863771	0.0265734	ENSOCUG00000005579	-0.971516	0.00120544
ocu-miR-18a-3p	XLOC_071077	-0.811591	0.0499031	ENSOCUG00000005579	-0.971516	0.00120544
novel_189	XLOC_015331	-0.929428	0.0072948	ENSOCUG00000003448	-0.971477	0.00120878
novel_189	XLOC_066586	-0.918587	0.00967224	ENSOCUG00000003448	-0.971477	0.00120878
novel_189	XLOC_058334	-0.900405	0.0143849	ENSOCUG00000003448	-0.971477	0.00120878
novel_189	XLOC_051895	-0.884268	0.0193157	ENSOCUG00000003448	-0.971477	0.00120878
novel_189	XLOC_074522	-0.879012	0.0210718	ENSOCUG00000003448	-0.971477	0.00120878
novel_189	XLOC_052285	-0.860404	0.0278703	ENSOCUG00000003448	-0.971477	0.00120878
novel_189	XLOC_068118	-0.845578	0.033928	ENSOCUG00000003448	-0.971477	0.00120878
novel_189	XLOC_013838	-0.835796	0.0382308	ENSOCUG00000003448	-0.971477	0.00120878
novel_189	XLOC_001139	-0.813209	0.0490775	ENSOCUG00000003448	-0.971477	0.00120878
novel_189	XLOC_072131	-0.812376	0.0495018	ENSOCUG00000003448	-0.971477	0.00120878
ocu-miR-107-3p	XLOC_004142	-0.853833	0.0304858	ENSOCUG00000016227	-0.971405	0.00121479
ocu-miR-423-5p	XLOC_070856	-0.925975	0.00801665	ENSOCUG00000013700	-0.971234	0.00122936
ocu-miR-423-5p	XLOC_006528	-0.904819	0.013158	ENSOCUG00000013700	-0.971234	0.00122936
ocu-miR-423-5p	XLOC_040494	-0.884102	0.0193702	ENSOCUG00000013700	-0.971234	0.00122936
ocu-miR-423-5p	XLOC_013482	-0.864242	0.0263942	ENSOCUG00000013700	-0.971234	0.00122936
ocu-miR-423-5p	XLOC_034223	-0.86299	0.0268715	ENSOCUG00000013700	-0.971234	0.00122936
ocu-miR-423-5p	XLOC_015737	-0.858863	0.0284738	ENSOCUG00000013700	-0.971234	0.00122936
ocu-miR-423-5p	XLOC_072277	-0.827545	0.0420466	ENSOCUG00000013700	-0.971234	0.00122936
ocu-miR-423-5p	XLOC_020404	-0.81657	0.0473841	ENSOCUG00000013700	-0.971234	0.00122936
ocu-miR-1197-3p	XLOC_062986	-0.963315	0.00199396	ENSOCUG00000002842	-0.971034	0.00124643
ocu-miR-1197-3p	XLOC_010346	-0.961527	0.0021918	ENSOCUG00000002842	-0.971034	0.00124643
ocu-miR-1197-3p	XLOC_052982	-0.933734	0.00644135	ENSOCUG00000002842	-0.971034	0.00124643
ocu-miR-1197-3p	XLOC_048275	-0.93316	0.00655214	ENSOCUG00000002842	-0.971034	0.00124643
ocu-miR-1197-3p	XLOC_028715	-0.90862	0.0121439	ENSOCUG00000002842	-0.971034	0.00124643
ocu-miR-1197-3p	XLOC_063387	-0.905033	0.0130999	ENSOCUG00000002842	-0.971034	0.00124643
ocu-miR-1197-3p	XLOC_036516	-0.893115	0.0165259	ENSOCUG00000002842	-0.971034	0.00124643
ocu-miR-1197-3p	XLOC_010450	-0.890488	0.0173325	ENSOCUG00000002842	-0.971034	0.00124643
ocu-miR-1197-3p	XLOC_047355	-0.88795	0.0181294	ENSOCUG00000002842	-0.971034	0.00124643
ocu-miR-1197-3p	XLOC_013302	-0.876174	0.0220499	ENSOCUG00000002842	-0.971034	0.00124643
ocu-miR-1197-3p	XLOC_071105	-0.874075	0.0227872	ENSOCUG00000002842	-0.971034	0.00124643
ocu-miR-1197-3p	XLOC_057299	-0.873135	0.0231212	ENSOCUG00000002842	-0.971034	0.00124643
ocu-miR-1197-3p	XLOC_048275	-0.850122	0.0320116	ENSOCUG00000002842	-0.971034	0.00124643
ocu-miR-1197-3p	XLOC_068118	-0.848727	0.0325943	ENSOCUG00000002842	-0.971034	0.00124643
ocu-miR-1197-3p	XLOC_069760	-0.845369	0.0340174	ENSOCUG00000002842	-0.971034	0.00124643
ocu-miR-1197-3p	XLOC_025714	-0.833049	0.0394824	ENSOCUG00000002842	-0.971034	0.00124643
ocu-miR-1197-3p	XLOC_037669	-0.831024	0.0404168	ENSOCUG00000002842	-0.971034	0.00124643
ocu-miR-1197-3p	XLOC_058083	-0.830652	0.0405895	ENSOCUG00000002842	-0.971034	0.00124643
ocu-miR-1197-3p	XLOC_006697	-0.823099	0.0441728	ENSOCUG00000002842	-0.971034	0.00124643
ocu-miR-1197-3p	XLOC_072977	-0.816636	0.0473511	ENSOCUG00000002842	-0.971034	0.00124643
ocu-miR-1197-3p	XLOC_013391	-0.813899	0.0487278	ENSOCUG00000002842	-0.971034	0.00124643
ocu-miR-19b-3p	XLOC_070856	-0.954134	0.00310727	ENSOCUG00000012633	-0.970921	0.00125611
ocu-miR-19b-3p	XLOC_037590	-0.866413	0.0255764	ENSOCUG00000012633	-0.970921	0.00125611
ocu-miR-541-5p	XLOC_039828	-0.852239	0.0311369	ENSOCUG00000004135	-0.970885	0.00125922
ocu-miR-541-5p	XLOC_002773	-0.84927	0.0323672	ENSOCUG00000004135	-0.970885	0.00125922
ocu-miR-541-5p	XLOC_037342	-0.829758	0.0410064	ENSOCUG00000004135	-0.970885	0.00125922
ocu-miR-541-5p	XLOC_068275	-0.816234	0.0475519	ENSOCUG00000004135	-0.970885	0.00125922
ocu-miR-181b-3p	XLOC_052285	-0.906166	0.0127941	ENSOCUG00000016002	-0.970716	0.00127373
ocu-miR-181b-3p	XLOC_069717	-0.851709	0.031355	ENSOCUG00000016002	-0.970716	0.00127373
ocu-miR-181b-3p	XLOC_013838	-0.830453	0.0406825	ENSOCUG00000016002	-0.970716	0.00127373
ocu-miR-128a-3p	XLOC_070856	-0.966824	0.0016327	ENSOCUG00000012457	-0.970585	0.0012851
ocu-miR-128a-3p	XLOC_069717	-0.8938	0.0163189	ENSOCUG00000012457	-0.970585	0.0012851
ocu-miR-128a-3p	XLOC_052285	-0.863156	0.0268081	ENSOCUG00000012457	-0.970585	0.0012851
ocu-miR-128a-3p	XLOC_048321	-0.853101	0.030784	ENSOCUG00000012457	-0.970585	0.0012851
ocu-miR-128a-3p	XLOC_027918	-0.842394	0.0353022	ENSOCUG00000012457	-0.970585	0.0012851
ocu-miR-128a-3p	XLOC_055203	-0.841438	0.0357197	ENSOCUG00000012457	-0.970585	0.0012851
ocu-miR-128a-3p	XLOC_013838	-0.811681	0.0498568	ENSOCUG00000012457	-0.970585	0.0012851
ocu-miR-138-3p	XLOC_009606	-0.985829	0.000299804	ENSOCUG00000015722	-0.970414	0.00130003
ocu-miR-138-3p	XLOC_063387	-0.974519	0.000965628	ENSOCUG00000015722	-0.970414	0.00130003
ocu-miR-138-3p	XLOC_072383	-0.965475	0.00176735	ENSOCUG00000015722	-0.970414	0.00130003
ocu-miR-138-3p	XLOC_061708	-0.964454	0.00187279	ENSOCUG00000015722	-0.970414	0.00130003
ocu-miR-138-3p	XLOC_066722	-0.959324	0.00244811	ENSOCUG00000015722	-0.970414	0.00130003
ocu-miR-138-3p	XLOC_048275	-0.953616	0.00317725	ENSOCUG00000015722	-0.970414	0.00130003
ocu-miR-138-3p	XLOC_024127	-0.951405	0.00348479	ENSOCUG00000015722	-0.970414	0.00130003
ocu-miR-138-3p	XLOC_006130	-0.947694	0.00403239	ENSOCUG00000015722	-0.970414	0.00130003
ocu-miR-138-3p	XLOC_013862	-0.939778	0.0053309	ENSOCUG00000015722	-0.970414	0.00130003
ocu-miR-138-3p	XLOC_044210	-0.935304	0.00614288	ENSOCUG00000015722	-0.970414	0.00130003
ocu-miR-138-3p	XLOC_014980	-0.932314	0.00671701	ENSOCUG00000015722	-0.970414	0.00130003
ocu-miR-138-3p	XLOC_014687	-0.930522	0.00707314	ENSOCUG00000015722	-0.970414	0.00130003
ocu-miR-138-3p	XLOC_014213	-0.929625	0.00725474	ENSOCUG00000015722	-0.970414	0.00130003
ocu-miR-138-3p	XLOC_050476	-0.928359	0.00751471	ENSOCUG00000015722	-0.970414	0.00130003
ocu-miR-138-3p	XLOC_008833	-0.925373	0.00814608	ENSOCUG00000015722	-0.970414	0.00130003
ocu-miR-138-3p	XLOC_034235	-0.92428	0.00838315	ENSOCUG00000015722	-0.970414	0.00130003
ocu-miR-138-3p	XLOC_062893	-0.918006	0.00980879	ENSOCUG00000015722	-0.970414	0.00130003
ocu-miR-138-3p	XLOC_076872	-0.916144	0.0102529	ENSOCUG00000015722	-0.970414	0.00130003
ocu-miR-138-3p	XLOC_029150	-0.910275	0.0117147	ENSOCUG00000015722	-0.970414	0.00130003
ocu-miR-138-3p	XLOC_076872	-0.907214	0.0125144	ENSOCUG00000015722	-0.970414	0.00130003
ocu-miR-138-3p	XLOC_023883	-0.906422	0.0127256	ENSOCUG00000015722	-0.970414	0.00130003
ocu-miR-138-3p	XLOC_028787	-0.897184	0.0153133	ENSOCUG00000015722	-0.970414	0.00130003
ocu-miR-138-3p	XLOC_053520	-0.887697	0.0182097	ENSOCUG00000015722	-0.970414	0.00130003
ocu-miR-138-3p	XLOC_024312	-0.885822	0.0188106	ENSOCUG00000015722	-0.970414	0.00130003
ocu-miR-138-3p	XLOC_069760	-0.884257	0.0193194	ENSOCUG00000015722	-0.970414	0.00130003
ocu-miR-138-3p	XLOC_052982	-0.872912	0.0232008	ENSOCUG00000015722	-0.970414	0.00130003
ocu-miR-138-3p	XLOC_062997	-0.86991	0.0242842	ENSOCUG00000015722	-0.970414	0.00130003
ocu-miR-138-3p	XLOC_022135	-0.860314	0.0279055	ENSOCUG00000015722	-0.970414	0.00130003
ocu-miR-138-3p	XLOC_067311	-0.856013	0.0296056	ENSOCUG00000015722	-0.970414	0.00130003
ocu-miR-138-3p	XLOC_057299	-0.851111	0.0316016	ENSOCUG00000015722	-0.970414	0.00130003
ocu-miR-138-3p	XLOC_071960	-0.839175	0.036717	ENSOCUG00000015722	-0.970414	0.00130003
ocu-miR-138-3p	XLOC_039075	-0.829173	0.0412804	ENSOCUG00000015722	-0.970414	0.00130003
ocu-miR-138-3p	XLOC_066888	-0.826008	0.0427763	ENSOCUG00000015722	-0.970414	0.00130003
ocu-miR-138-3p	XLOC_033505	-0.822463	0.0444813	ENSOCUG00000015722	-0.970414	0.00130003
ocu-miR-138-3p	XLOC_019793	-0.82194	0.0447352	ENSOCUG00000015722	-0.970414	0.00130003
ocu-miR-138-3p	XLOC_028715	-0.82097	0.0452087	ENSOCUG00000015722	-0.970414	0.00130003
ocu-miR-138-3p	XLOC_058523	-0.81697	0.0471845	ENSOCUG00000015722	-0.970414	0.00130003
ocu-miR-138-3p	XLOC_031456	-0.814065	0.0486438	ENSOCUG00000015722	-0.970414	0.00130003
ocu-miR-138-3p	XLOC_070876	-0.813508	0.048926	ENSOCUG00000015722	-0.970414	0.00130003
ocu-miR-138-3p	XLOC_022364	-0.812981	0.0491936	ENSOCUG00000015722	-0.970414	0.00130003
ocu-miR-140-3p	XLOC_068193	-0.903882	0.013414	ENSOCUG00000016164	-0.97035	0.00130561
ocu-miR-140-3p	XLOC_049008	-0.878419	0.0212744	ENSOCUG00000016164	-0.97035	0.00130561
ocu-miR-140-3p	XLOC_010611	-0.853096	0.0307859	ENSOCUG00000016164	-0.97035	0.00130561
ocu-miR-140-3p	XLOC_061287	-0.833697	0.0391852	ENSOCUG00000016164	-0.97035	0.00130561
ocu-miR-342-3p	XLOC_005253	-0.947138	0.00411767	ENSOCUG00000014159	-0.970337	0.00130682
ocu-miR-342-3p	XLOC_055203	-0.843157	0.0349706	ENSOCUG00000014159	-0.970337	0.00130682
ocu-miR-342-3p	XLOC_060914	-0.838476	0.0370279	ENSOCUG00000014159	-0.970337	0.00130682
ocu-miR-20b-5p	XLOC_005253	-0.956055	0.00285433	ENSOCUG00000008127	-0.970333	0.00130715
ocu-miR-20b-5p	XLOC_069717	-0.871293	0.0237822	ENSOCUG00000008127	-0.970333	0.00130715
ocu-miR-20b-5p	XLOC_055203	-0.866049	0.0257125	ENSOCUG00000008127	-0.970333	0.00130715
ocu-miR-20b-5p	XLOC_053429	-0.846954	0.0333423	ENSOCUG00000008127	-0.970333	0.00130715
ocu-miR-33a-5p	XLOC_014208	-0.837993	0.0372432	ENSOCUG00000015312	-0.97031	0.00130913
ocu-miR-33a-5p	XLOC_052285	-0.81495	0.048197	ENSOCUG00000015312	-0.97031	0.00130913
ocu-miR-28-3p	XLOC_061502	-0.876104	0.0220745	ENSOCUG00000010148	-0.970099	0.00132771
ocu-miR-28-3p	XLOC_015155	-0.813121	0.0491222	ENSOCUG00000010148	-0.970099	0.00132771
ocu-miR-106a-3p	XLOC_055203	-0.838003	0.0372391	ENSOCUG00000015035	-0.969979	0.0013384
ocu-miR-106a-3p	XLOC_061318	-0.825712	0.0429173	ENSOCUG00000015035	-0.969979	0.0013384
ocu-miR-599-5p	XLOC_061318	-0.825712	0.0429173	ENSOCUG00000015035	-0.969979	0.0013384
ocu-miR-106a-3p	XLOC_046949	-0.816407	0.0474654	ENSOCUG00000015035	-0.969979	0.0013384
ocu-miR-155-3p	XLOC_052285	-0.884951	0.0190931	ENSOCUG00000012633	-0.96997	0.00133914
ocu-miR-383-3p	XLOC_037590	-0.88093	0.0204225	ENSOCUG00000012633	-0.96997	0.00133914
ocu-miR-383-3p	XLOC_069717	-0.876241	0.0220268	ENSOCUG00000012633	-0.96997	0.00133914
ocu-miR-155-3p	XLOC_055203	-0.866811	0.0254275	ENSOCUG00000012633	-0.96997	0.00133914
ocu-miR-383-3p	XLOC_055203	-0.866811	0.0254275	ENSOCUG00000012633	-0.96997	0.00133914
ocu-miR-155-3p	XLOC_048321	-0.831511	0.0401911	ENSOCUG00000012633	-0.96997	0.00133914
ocu-miR-155-3p	XLOC_013838	-0.812072	0.0496568	ENSOCUG00000012633	-0.96997	0.00133914
ocu-miR-423-5p	XLOC_070856	-0.925975	0.00801665	ENSOCUG00000015049	-0.969784	0.00135571
ocu-miR-423-5p	XLOC_006528	-0.904819	0.013158	ENSOCUG00000015049	-0.969784	0.00135571
ocu-miR-423-5p	XLOC_040494	-0.884102	0.0193702	ENSOCUG00000015049	-0.969784	0.00135571
ocu-miR-423-5p	XLOC_013482	-0.864242	0.0263942	ENSOCUG00000015049	-0.969784	0.00135571
ocu-miR-423-5p	XLOC_034223	-0.86299	0.0268715	ENSOCUG00000015049	-0.969784	0.00135571
ocu-miR-423-5p	XLOC_015737	-0.858863	0.0284738	ENSOCUG00000015049	-0.969784	0.00135571
ocu-miR-423-5p	XLOC_072277	-0.827545	0.0420466	ENSOCUG00000015049	-0.969784	0.00135571
ocu-miR-423-5p	XLOC_020404	-0.81657	0.0473841	ENSOCUG00000015049	-0.969784	0.00135571
ocu-miR-20a-3p	XLOC_013838	-0.880597	0.0205345	ENSOCUG00000016945	-0.969648	0.00136789
ocu-miR-20a-3p	XLOC_052285	-0.83564	0.0383012	ENSOCUG00000016945	-0.969648	0.00136789
ocu-miR-20a-3p	XLOC_048321	-0.817777	0.0467822	ENSOCUG00000016945	-0.969648	0.00136789
ocu-miR-30e-3p	XLOC_070856	-0.982748	0.000443872	ENSOCUG00000005409	-0.969405	0.00138976
ocu-miR-30e-3p	XLOC_037590	-0.91254	0.0111394	ENSOCUG00000005409	-0.969405	0.00138976
ocu-miR-30e-3p	XLOC_060914	-0.862465	0.0270732	ENSOCUG00000005409	-0.969405	0.00138976
ocu-miR-30e-3p	XLOC_038340	-0.849965	0.0320772	ENSOCUG00000005409	-0.969405	0.00138976
ocu-miR-30e-3p	XLOC_045965	-0.812267	0.0495574	ENSOCUG00000005409	-0.969405	0.00138976
ocu-miR-350-3p	XLOC_021052	-0.865143	0.0260535	ENSOCUG00000007249	-0.969389	0.00139122
ocu-miR-350-3p	XLOC_073875	-0.813346	0.0490083	ENSOCUG00000007249	-0.969389	0.00139122
ocu-miR-181b-2-3p	XLOC_052285	-0.879939	0.0207565	ENSOCUG00000000271	-0.969374	0.00139255
ocu-miR-200c-3p	XLOC_061480	-0.815581	0.0478793	ENSOCUG00000005409	-0.969126	0.00141507
ocu-miR-1197-3p	XLOC_062986	-0.963315	0.00199396	ENSOCUG00000004325	-0.969115	0.00141607
ocu-miR-1197-3p	XLOC_010346	-0.961527	0.0021918	ENSOCUG00000004325	-0.969115	0.00141607
ocu-miR-1197-3p	XLOC_052982	-0.933734	0.00644135	ENSOCUG00000004325	-0.969115	0.00141607
ocu-miR-1197-3p	XLOC_048275	-0.93316	0.00655214	ENSOCUG00000004325	-0.969115	0.00141607
ocu-miR-1197-3p	XLOC_028715	-0.90862	0.0121439	ENSOCUG00000004325	-0.969115	0.00141607
ocu-miR-1197-3p	XLOC_063387	-0.905033	0.0130999	ENSOCUG00000004325	-0.969115	0.00141607
ocu-miR-1197-3p	XLOC_036516	-0.893115	0.0165259	ENSOCUG00000004325	-0.969115	0.00141607
ocu-miR-1197-3p	XLOC_010450	-0.890488	0.0173325	ENSOCUG00000004325	-0.969115	0.00141607
ocu-miR-1197-3p	XLOC_047355	-0.88795	0.0181294	ENSOCUG00000004325	-0.969115	0.00141607
ocu-miR-1197-3p	XLOC_013302	-0.876174	0.0220499	ENSOCUG00000004325	-0.969115	0.00141607
ocu-miR-1197-3p	XLOC_071105	-0.874075	0.0227872	ENSOCUG00000004325	-0.969115	0.00141607
ocu-miR-1197-3p	XLOC_057299	-0.873135	0.0231212	ENSOCUG00000004325	-0.969115	0.00141607
ocu-miR-1197-3p	XLOC_048275	-0.850122	0.0320116	ENSOCUG00000004325	-0.969115	0.00141607
ocu-miR-1197-3p	XLOC_068118	-0.848727	0.0325943	ENSOCUG00000004325	-0.969115	0.00141607
ocu-miR-1197-3p	XLOC_069760	-0.845369	0.0340174	ENSOCUG00000004325	-0.969115	0.00141607
ocu-miR-1197-3p	XLOC_025714	-0.833049	0.0394824	ENSOCUG00000004325	-0.969115	0.00141607
ocu-miR-1197-3p	XLOC_037669	-0.831024	0.0404168	ENSOCUG00000004325	-0.969115	0.00141607
ocu-miR-1197-3p	XLOC_058083	-0.830652	0.0405895	ENSOCUG00000004325	-0.969115	0.00141607
ocu-miR-1197-3p	XLOC_006697	-0.823099	0.0441728	ENSOCUG00000004325	-0.969115	0.00141607
ocu-miR-1197-3p	XLOC_072977	-0.816636	0.0473511	ENSOCUG00000004325	-0.969115	0.00141607
ocu-miR-1197-3p	XLOC_013391	-0.813899	0.0487278	ENSOCUG00000004325	-0.969115	0.00141607
ocu-miR-193a-5p	XLOC_065024	-0.873855	0.022865	ENSOCUG00000022347	-0.968825	0.00144266
ocu-miR-24-2-5p	XLOC_028680	-0.918134	0.00977881	ENSOCUG00000026184	-0.968808	0.00144427
ocu-miR-24-2-5p	XLOC_028680	-0.906721	0.0126458	ENSOCUG00000026184	-0.968808	0.00144427
ocu-miR-24-2-5p	XLOC_010756	-0.843382	0.0348729	ENSOCUG00000026184	-0.968808	0.00144427
ocu-miR-134-5p	XLOC_069159	-0.869442	0.0244553	ENSOCUG00000016645	-0.968755	0.00144911
ocu-miR-134-5p	XLOC_028407	-0.857066	0.0291851	ENSOCUG00000016645	-0.968755	0.00144911
ocu-miR-12090-5p	XLOC_055875	-0.928953	0.0073922	ENSOCUG00000006382	-0.968735	0.00145101
ocu-miR-12090-5p	XLOC_013838	-0.856424	0.0294412	ENSOCUG00000006382	-0.968735	0.00145101
ocu-miR-30c-3p	XLOC_045965	-0.906911	0.012595	ENSOCUG00000016088	-0.968575	0.00146578
ocu-miR-30c-3p	XLOC_055203	-0.873095	0.0231356	ENSOCUG00000016088	-0.968575	0.00146578
ocu-miR-148b-5p	XLOC_032005	-0.970743	0.00127146	ENSOCUG00000012071	-0.968535	0.00146953
ocu-miR-148b-5p	XLOC_020951	-0.966101	0.00170419	ENSOCUG00000012071	-0.968535	0.00146953
ocu-miR-148b-5p	XLOC_033782	-0.960439	0.00231667	ENSOCUG00000012071	-0.968535	0.00146953
ocu-miR-148b-5p	XLOC_021052	-0.959944	0.00237455	ENSOCUG00000012071	-0.968535	0.00146953
ocu-miR-148b-5p	XLOC_030906	-0.957471	0.00267467	ENSOCUG00000012071	-0.968535	0.00146953
ocu-miR-148b-5p	XLOC_025564	-0.947854	0.00400787	ENSOCUG00000012071	-0.968535	0.00146953
ocu-miR-148b-5p	XLOC_032005	-0.896198	0.0156031	ENSOCUG00000012071	-0.968535	0.00146953
ocu-miR-148b-5p	XLOC_025564	-0.878273	0.0213244	ENSOCUG00000012071	-0.968535	0.00146953
ocu-miR-148b-5p	XLOC_073502	-0.844475	0.0344011	ENSOCUG00000012071	-0.968535	0.00146953
ocu-miR-148b-5p	XLOC_057581	-0.841859	0.0355356	ENSOCUG00000012071	-0.968535	0.00146953
ocu-miR-148b-5p	XLOC_050476	-0.817007	0.0471656	ENSOCUG00000012071	-0.968535	0.00146953
ocu-miR-671-5p	XLOC_061480	-0.938204	0.00561008	ENSOCUG00000027387	-0.968487	0.001474
ocu-miR-671-5p	XLOC_070856	-0.917661	0.00989053	ENSOCUG00000027387	-0.968487	0.001474
ocu-miR-671-5p	XLOC_047114	-0.852211	0.0311483	ENSOCUG00000027387	-0.968487	0.001474
ocu-miR-671-5p	XLOC_069717	-0.83249	0.0397392	ENSOCUG00000027387	-0.968487	0.001474
ocu-miR-185-3p	XLOC_066658	-0.928236	0.00754023	ENSOCUG00000005305	-0.968425	0.00147976
ocu-miR-185-3p	XLOC_025346	-0.89677	0.0154347	ENSOCUG00000005305	-0.968425	0.00147976
ocu-miR-185-3p	XLOC_040494	-0.885277	0.0189872	ENSOCUG00000005305	-0.968425	0.00147976
ocu-miR-185-3p	XLOC_015737	-0.875587	0.0222551	ENSOCUG00000005305	-0.968425	0.00147976
ocu-miR-185-3p	XLOC_013910	-0.873362	0.0230402	ENSOCUG00000005305	-0.968425	0.00147976
ocu-miR-185-3p	XLOC_061480	-0.857699	0.0289336	ENSOCUG00000005305	-0.968425	0.00147976
ocu-miR-185-3p	XLOC_040494	-0.816567	0.0473856	ENSOCUG00000005305	-0.968425	0.00147976
ocu-miR-128a-3p	XLOC_070856	-0.966824	0.0016327	ENSOCUG00000005409	-0.968379	0.00148398
ocu-miR-128a-3p	XLOC_069717	-0.8938	0.0163189	ENSOCUG00000005409	-0.968379	0.00148398
ocu-miR-128a-3p	XLOC_052285	-0.863156	0.0268081	ENSOCUG00000005409	-0.968379	0.00148398
ocu-miR-128a-3p	XLOC_048321	-0.853101	0.030784	ENSOCUG00000005409	-0.968379	0.00148398
ocu-miR-128a-3p	XLOC_027918	-0.842394	0.0353022	ENSOCUG00000005409	-0.968379	0.00148398
ocu-miR-128a-3p	XLOC_055203	-0.841438	0.0357197	ENSOCUG00000005409	-0.968379	0.00148398
ocu-miR-128a-3p	XLOC_013838	-0.811681	0.0498568	ENSOCUG00000005409	-0.968379	0.00148398
ocu-miR-6529-5p	XLOC_021052	-0.848056	0.0328766	ENSOCUG00000005958	-0.968302	0.00149125
ocu-miR-6529-5p	XLOC_052285	-0.836171	0.0380615	ENSOCUG00000005958	-0.968302	0.00149125
ocu-miR-6529-5p	XLOC_020951	-0.833131	0.0394446	ENSOCUG00000005958	-0.968302	0.00149125
ocu-miR-212-3p	XLOC_010923	-0.984297	0.000367921	ENSOCUG00000012527	-0.968291	0.00149229
ocu-miR-212-3p	XLOC_025564	-0.976648	0.000811576	ENSOCUG00000012527	-0.968291	0.00149229
ocu-miR-212-3p	XLOC_010923	-0.954708	0.00303064	ENSOCUG00000012527	-0.968291	0.00149229
ocu-miR-212-3p	XLOC_025564	-0.830715	0.0405606	ENSOCUG00000012527	-0.968291	0.00149229
ocu-miR-212-3p	XLOC_021052	-0.829739	0.0410156	ENSOCUG00000012527	-0.968291	0.00149229
ocu-miR-212-3p	XLOC_071014	-0.827637	0.0420033	ENSOCUG00000012527	-0.968291	0.00149229
ocu-miR-212-3p	XLOC_010690	-0.821672	0.044866	ENSOCUG00000012527	-0.968291	0.00149229
ocu-miR-17-5p	XLOC_005253	-0.949251	0.00379781	ENSOCUG00000016002	-0.968282	0.0014931
ocu-miR-17-5p	XLOC_069717	-0.894175	0.0162058	ENSOCUG00000016002	-0.968282	0.0014931
ocu-miR-17-5p	XLOC_053429	-0.852249	0.0311327	ENSOCUG00000016002	-0.968282	0.0014931
ocu-miR-17-5p	XLOC_055203	-0.847994	0.0329027	ENSOCUG00000016002	-0.968282	0.0014931
ocu-miR-17-5p	XLOC_061480	-0.836424	0.0379472	ENSOCUG00000016002	-0.968282	0.0014931
ocu-miR-30e-5p	XLOC_070856	-0.927909	0.00760824	ENSOCUG00000004574	-0.968248	0.00149628
ocu-miR-30e-5p	XLOC_061480	-0.906218	0.0127802	ENSOCUG00000004574	-0.968248	0.00149628
ocu-miR-30e-5p	XLOC_069717	-0.867606	0.0251318	ENSOCUG00000004574	-0.968248	0.00149628
ocu-miR-30e-5p	XLOC_052285	-0.860539	0.027818	ENSOCUG00000004574	-0.968248	0.00149628
ocu-miR-30e-5p	XLOC_060914	-0.835956	0.0381584	ENSOCUG00000004574	-0.968248	0.00149628
ocu-miR-106a-5p	XLOC_005253	-0.963986	0.00192219	ENSOCUG00000016002	-0.968243	0.00149672
ocu-miR-106a-5p	XLOC_055203	-0.876656	0.0218825	ENSOCUG00000016002	-0.968243	0.00149672
ocu-miR-106a-5p	XLOC_069717	-0.863926	0.0265146	ENSOCUG00000016002	-0.968243	0.00149672
ocu-miR-106a-5p	XLOC_053429	-0.83303	0.0394909	ENSOCUG00000016002	-0.968243	0.00149672
ocu-miR-200c-3p	XLOC_061480	-0.815581	0.0478793	ENSOCUG00000012457	-0.968224	0.00149849
ocu-miR-20a-5p	XLOC_005253	-0.956391	0.00281116	ENSOCUG00000016002	-0.968175	0.00150317
ocu-miR-20a-5p	XLOC_069717	-0.883813	0.0194648	ENSOCUG00000016002	-0.968175	0.00150317
ocu-miR-20a-5p	XLOC_055203	-0.858516	0.0286103	ENSOCUG00000016002	-0.968175	0.00150317
ocu-miR-20a-5p	XLOC_053429	-0.846051	0.0337263	ENSOCUG00000016002	-0.968175	0.00150317
ocu-let-7f-3p	XLOC_013838	-0.933304	0.00652409	ENSOCUG00000001842	-0.968133	0.00150704
ocu-let-7f-3p	XLOC_061469	-0.931951	0.00678838	ENSOCUG00000001842	-0.968133	0.00150704
ocu-let-7f-3p	XLOC_070856	-0.830591	0.0406181	ENSOCUG00000001842	-0.968133	0.00150704
ocu-miR-424-3p	XLOC_068118	-0.897064	0.0153485	ENSOCUG00000012915	-0.968121	0.00150822
ocu-miR-424-3p	XLOC_050476	-0.866691	0.0254725	ENSOCUG00000012915	-0.968121	0.00150822
ocu-miR-424-3p	XLOC_037342	-0.859252	0.0283211	ENSOCUG00000012915	-0.968121	0.00150822
ocu-miR-1249-5p	XLOC_071193	-0.985509	0.000313471	ENSOCUG00000006444	-0.968103	0.00150989
ocu-miR-1249-5p	XLOC_035023	-0.984673	0.000350573	ENSOCUG00000006444	-0.968103	0.00150989
ocu-miR-1249-5p	XLOC_062719	-0.96251	0.00208195	ENSOCUG00000006444	-0.968103	0.00150989
ocu-miR-1249-5p	XLOC_069852	-0.935212	0.00616019	ENSOCUG00000006444	-0.968103	0.00150989
ocu-miR-1249-5p	XLOC_034563	-0.90874	0.0121125	ENSOCUG00000006444	-0.968103	0.00150989
ocu-miR-1249-5p	XLOC_054413	-0.905965	0.012848	ENSOCUG00000006444	-0.968103	0.00150989
ocu-miR-1249-5p	XLOC_058032	-0.879771	0.0208136	ENSOCUG00000006444	-0.968103	0.00150989
ocu-miR-1249-5p	XLOC_044121	-0.868488	0.0248057	ENSOCUG00000006444	-0.968103	0.00150989
ocu-miR-1249-5p	XLOC_061493	-0.862947	0.0268882	ENSOCUG00000006444	-0.968103	0.00150989
ocu-miR-1249-5p	XLOC_040494	-0.862537	0.0270454	ENSOCUG00000006444	-0.968103	0.00150989
ocu-miR-1249-5p	XLOC_042760	-0.857471	0.0290239	ENSOCUG00000006444	-0.968103	0.00150989
ocu-miR-1249-5p	XLOC_004867	-0.852802	0.0309061	ENSOCUG00000006444	-0.968103	0.00150989
ocu-miR-1249-5p	XLOC_034563	-0.839953	0.036373	ENSOCUG00000006444	-0.968103	0.00150989
ocu-miR-1249-5p	XLOC_013716	-0.814239	0.0485559	ENSOCUG00000006444	-0.968103	0.00150989
ocu-miR-1249-5p	XLOC_013716	-0.812106	0.0496397	ENSOCUG00000006444	-0.968103	0.00150989
ocu-miR-24-5p	XLOC_065024	-0.858098	0.0287754	ENSOCUG00000000444	-0.968006	0.00151902
ocu-miR-24-5p	XLOC_022364	-0.848845	0.0325451	ENSOCUG00000000444	-0.968006	0.00151902
ocu-miR-128a-3p	XLOC_070856	-0.966824	0.0016327	ENSOCUG00000003217	-0.967984	0.00152117
ocu-miR-128a-3p	XLOC_069717	-0.8938	0.0163189	ENSOCUG00000003217	-0.967984	0.00152117
ocu-miR-128a-3p	XLOC_052285	-0.863156	0.0268081	ENSOCUG00000003217	-0.967984	0.00152117
ocu-miR-128a-3p	XLOC_048321	-0.853101	0.030784	ENSOCUG00000003217	-0.967984	0.00152117
ocu-miR-128a-3p	XLOC_027918	-0.842394	0.0353022	ENSOCUG00000003217	-0.967984	0.00152117
ocu-miR-128a-3p	XLOC_055203	-0.841438	0.0357197	ENSOCUG00000003217	-0.967984	0.00152117
ocu-miR-128a-3p	XLOC_013838	-0.811681	0.0498568	ENSOCUG00000003217	-0.967984	0.00152117
ocu-miR-128a-3p	XLOC_070856	-0.966824	0.0016327	ENSOCUG00000001467	-0.967977	0.00152179
ocu-miR-128a-3p	XLOC_069717	-0.8938	0.0163189	ENSOCUG00000001467	-0.967977	0.00152179
ocu-miR-128a-3p	XLOC_052285	-0.863156	0.0268081	ENSOCUG00000001467	-0.967977	0.00152179
ocu-miR-128a-3p	XLOC_048321	-0.853101	0.030784	ENSOCUG00000001467	-0.967977	0.00152179
ocu-miR-128a-3p	XLOC_027918	-0.842394	0.0353022	ENSOCUG00000001467	-0.967977	0.00152179
ocu-miR-128a-3p	XLOC_055203	-0.841438	0.0357197	ENSOCUG00000001467	-0.967977	0.00152179
ocu-miR-128a-3p	XLOC_013838	-0.811681	0.0498568	ENSOCUG00000001467	-0.967977	0.00152179
ocu-miR-200c-3p	XLOC_061480	-0.815581	0.0478793	ENSOCUG00000016329	-0.967754	0.00154294
novel_119	XLOC_005253	-0.963309	0.00199468	ENSOCUG00000014993	-0.967696	0.00154843
novel_119	XLOC_070856	-0.906467	0.0127134	ENSOCUG00000014993	-0.967696	0.00154843
novel_119	XLOC_071077	-0.833956	0.0390671	ENSOCUG00000014993	-0.967696	0.00154843
ocu-miR-20b-5p	XLOC_005253	-0.956055	0.00285433	ENSOCUG00000007211	-0.967537	0.00156364
ocu-miR-20b-5p	XLOC_069717	-0.871293	0.0237822	ENSOCUG00000007211	-0.967537	0.00156364
ocu-miR-20b-5p	XLOC_055203	-0.866049	0.0257125	ENSOCUG00000007211	-0.967537	0.00156364
ocu-miR-20b-5p	XLOC_053429	-0.846954	0.0333423	ENSOCUG00000007211	-0.967537	0.00156364
ocu-miR-141-3p	XLOC_069717	-0.883578	0.0195422	ENSOCUG00000016329	-0.967537	0.0015637
ocu-miR-141-3p	XLOC_052285	-0.875461	0.0222993	ENSOCUG00000016329	-0.967537	0.0015637
ocu-miR-141-3p	XLOC_027918	-0.836904	0.0377314	ENSOCUG00000016329	-0.967537	0.0015637
ocu-miR-409-3p	XLOC_057299	-0.963683	0.00195441	ENSOCUG00000008373	-0.967507	0.00156651
ocu-miR-409-3p	XLOC_007967	-0.956388	0.00281152	ENSOCUG00000008373	-0.967507	0.00156651
ocu-miR-409-3p	XLOC_062893	-0.920169	0.00930508	ENSOCUG00000008373	-0.967507	0.00156651
ocu-miR-409-3p	XLOC_051022	-0.910018	0.0117808	ENSOCUG00000008373	-0.967507	0.00156651
ocu-miR-409-3p	XLOC_062997	-0.906843	0.0126131	ENSOCUG00000008373	-0.967507	0.00156651
ocu-miR-409-3p	XLOC_066722	-0.903802	0.013436	ENSOCUG00000008373	-0.967507	0.00156651
ocu-miR-409-3p	XLOC_037195	-0.886983	0.0184375	ENSOCUG00000008373	-0.967507	0.00156651
ocu-miR-409-3p	XLOC_052920	-0.88686	0.018477	ENSOCUG00000008373	-0.967507	0.00156651
ocu-miR-409-3p	XLOC_017246	-0.876432	0.02196	ENSOCUG00000008373	-0.967507	0.00156651
ocu-miR-409-3p	XLOC_010558	-0.871727	0.0236258	ENSOCUG00000008373	-0.967507	0.00156651
ocu-miR-409-3p	XLOC_028680	-0.871587	0.0236762	ENSOCUG00000008373	-0.967507	0.00156651
ocu-miR-409-3p	XLOC_031921	-0.869349	0.0244893	ENSOCUG00000008373	-0.967507	0.00156651
ocu-miR-409-3p	XLOC_038015	-0.869149	0.0245626	ENSOCUG00000008373	-0.967507	0.00156651
ocu-miR-409-3p	XLOC_016048	-0.861208	0.0275582	ENSOCUG00000008373	-0.967507	0.00156651
ocu-miR-409-3p	XLOC_056387	-0.857885	0.0288599	ENSOCUG00000008373	-0.967507	0.00156651
ocu-miR-409-3p	XLOC_012639	-0.857209	0.0291283	ENSOCUG00000008373	-0.967507	0.00156651
ocu-miR-409-3p	XLOC_017205	-0.853629	0.0305687	ENSOCUG00000008373	-0.967507	0.00156651
ocu-miR-409-3p	XLOC_050211	-0.849544	0.0322528	ENSOCUG00000008373	-0.967507	0.00156651
ocu-miR-409-3p	XLOC_033257	-0.833082	0.039467	ENSOCUG00000008373	-0.967507	0.00156651
ocu-miR-409-3p	XLOC_010756	-0.831724	0.0400928	ENSOCUG00000008373	-0.967507	0.00156651
ocu-miR-409-3p	XLOC_027971	-0.830479	0.0406704	ENSOCUG00000008373	-0.967507	0.00156651
ocu-miR-409-3p	XLOC_005858	-0.825192	0.0431661	ENSOCUG00000008373	-0.967507	0.00156651
ocu-miR-409-3p	XLOC_056420	-0.822382	0.0445204	ENSOCUG00000008373	-0.967507	0.00156651
ocu-miR-409-3p	XLOC_028787	-0.819972	0.0456975	ENSOCUG00000008373	-0.967507	0.00156651
ocu-miR-409-3p	XLOC_010604	-0.819899	0.0457334	ENSOCUG00000008373	-0.967507	0.00156651
ocu-miR-409-3p	XLOC_046127	-0.818289	0.0465282	ENSOCUG00000008373	-0.967507	0.00156651
ocu-miR-409-3p	XLOC_049214	-0.815978	0.0476803	ENSOCUG00000008373	-0.967507	0.00156651
ocu-miR-409-3p	XLOC_004699	-0.815404	0.0479683	ENSOCUG00000008373	-0.967507	0.00156651
ocu-miR-219b-3p	XLOC_070856	-0.890551	0.0173132	ENSOCUG00000008499	-0.967482	0.0015689
ocu-miR-34c-5p	XLOC_052285	-0.979926	0.000600376	ENSOCUG00000025830	-0.967461	0.00157097
ocu-miR-34c-5p	XLOC_015331	-0.92583	0.00804777	ENSOCUG00000025830	-0.967461	0.00157097
ocu-miR-34c-5p	XLOC_014121	-0.924116	0.00841914	ENSOCUG00000025830	-0.967461	0.00157097
ocu-miR-34c-5p	XLOC_016645	-0.889531	0.017631	ENSOCUG00000025830	-0.967461	0.00157097
ocu-miR-34c-5p	XLOC_013838	-0.873458	0.0230063	ENSOCUG00000025830	-0.967461	0.00157097
ocu-miR-34c-5p	XLOC_058334	-0.817265	0.0470373	ENSOCUG00000025830	-0.967461	0.00157097
ocu-let-7f-2-3p	XLOC_013838	-0.820351	0.0455114	ENSOCUG00000003039	-0.967363	0.00158035
ocu-miR-139-5p	XLOC_074548	-0.852375	0.031081	ENSOCUG00000024509	-0.967306	0.00158583
ocu-miR-139-5p	XLOC_010756	-0.850381	0.031904	ENSOCUG00000024509	-0.967306	0.00158583
ocu-miR-139-5p	XLOC_028680	-0.815833	0.0477528	ENSOCUG00000024509	-0.967306	0.00158583
ocu-miR-323a-3p	XLOC_008833	-0.953642	0.00317372	ENSOCUG00000007732	-0.967235	0.0015927
[truncated: 88,668 more rows]
