# Supplementary material for: Functional lncRNA-miRNA-mRNA networks in rabbit carotid atherosclerosis
Source: Aging (Albany NY). 2020 Feb 11;12(3):2798–813. doi: 10.18632/aging.102778 (PMC7041763; doi:10.18632/aging.102778)
Supplement: Supplementary Table 5 [file aging-12-102778-s004..xls]

## Sheet: Sheet1
Supplementary Table 5. GO enrichment analysis of the lncRNA-miRNA-mRNA-targeted genes.
GO_accession	Description	Term_type	Over_represented_pValue	Corrected_pValue	DEG_item	DEG_list	Bg_item
GO:0002376	immune system process	biological_process	1.1276e-20	2.0198e-16	91	384	1406
GO:0001775	cell activation	biological_process	5.1705e-17	4.4107e-13	49	384	535
GO:0022610	biological adhesion	biological_process	7.3873e-17	4.4107e-13	63	384	859
GO:0002684	positive regulation of immune system process	biological_process	5.5519e-16	2.4686e-12	45	384	483
GO:0045321	leukocyte activation	biological_process	6.9882e-16	2.4686e-12	44	384	465
GO:0007155	cell adhesion	biological_process	8.269e-16	2.4686e-12	61	384	854
GO:0006955	immune response	biological_process	2.0833e-15	5.3308e-12	54	384	702
GO:0044421	extracellular region part	cellular_component	5.0169e-15	1.1233e-11	118	384	2580
GO:0002682	regulation of immune system process	biological_process	1.2619e-14	2.5115e-11	56	384	782
GO:0046649	lymphocyte activation	biological_process	5.5115e-14	9.8722e-11	38	384	398
GO:0005576	extracellular region	cellular_component	1.4822e-13	2.4136e-10	122	384	2843
GO:0007275	multicellular organismal development	biological_process	1.5338e-12	2.1009e-09	122	384	2939
GO:0030155	regulation of cell adhesion	biological_process	1.6731e-12	2.1009e-09	37	384	423
GO:0016337	single organismal cell-cell adhesion	biological_process	1.7172e-12	2.1009e-09	39	384	467
GO:0031012	extracellular matrix	cellular_component	1.7594e-12	2.1009e-09	30	384	282
GO:0048731	system development	biological_process	3.1234e-12	3.4966e-09	115	384	2726
GO:0002521	leukocyte differentiation	biological_process	3.481e-12	3.6678e-09	32	384	329
GO:0002520	immune system development	biological_process	5.1889e-12	5.0755e-09	44	384	601
GO:0098609	cell-cell adhesion	biological_process	5.3838e-12	5.0755e-09	42	384	554
GO:0007166	cell surface receptor signaling pathway	biological_process	5.8278e-12	5.2194e-09	73	384	1392
GO:0048513	organ development	biological_process	1.0618e-11	9.0566e-09	94	384	2069
GO:0030097	hemopoiesis	biological_process	1.8003e-11	1.4329e-08	40	384	528
GO:0098602	single organism cell adhesion	biological_process	1.84e-11	1.4329e-08	39	384	505
GO:0034109	homotypic cell-cell adhesion	biological_process	2.0164e-11	1.5049e-08	31	384	331
GO:0009986	cell surface	cellular_component	2.6186e-11	1.8762e-08	37	384	465
GO:0048534	hematopoietic or lymphoid organ development	biological_process	4.4071e-11	3.0362e-08	41	384	568
GO:0048856	anatomical structure development	biological_process	5.1164e-11	3.3942e-08	127	384	3277
GO:0010033	response to organic substance	biological_process	7.9787e-11	5.0749e-08	69	384	1352
GO:0044459	plasma membrane part	cellular_component	8.2165e-11	5.0749e-08	61	384	1117
GO:0022407	regulation of cell-cell adhesion	biological_process	8.85e-11	5.2841e-08	26	384	250
GO:0005578	proteinaceous extracellular matrix	cellular_component	1.6686e-10	9.6413e-08	23	384	201
GO:0048518	positive regulation of biological process	biological_process	1.807e-10	1.0115e-07	132	384	3524
GO:0042110	T cell activation	biological_process	2.2991e-10	1.2112e-07	27	384	281
GO:0070489	T cell aggregation	biological_process	2.2991e-10	1.2112e-07	27	384	281
GO:0050865	regulation of cell activation	biological_process	2.4148e-10	1.2358e-07	28	384	302
GO:0071593	lymphocyte aggregation	biological_process	2.488e-10	1.2379e-07	27	384	282
GO:0044767	single-organism developmental process	biological_process	4.0243e-10	1.9482e-07	131	384	3529
GO:0070486	leukocyte aggregation	biological_process	4.2797e-10	2.0173e-07	27	384	289
GO:0007159	leukocyte cell-cell adhesion	biological_process	4.7007e-10	2.1589e-07	28	384	311
GO:0051239	regulation of multicellular organismal process	biological_process	4.8268e-10	2.1615e-07	79	384	1726
GO:0034110	regulation of homotypic cell-cell adhesion	biological_process	6.3242e-10	2.731e-07	22	384	195
GO:0032502	developmental process	biological_process	6.4038e-10	2.731e-07	131	384	3554
GO:0051240	positive regulation of multicellular organismal process	biological_process	7.3751e-10	3.0722e-07	53	384	949
GO:0044699	single-organism process	biological_process	7.9176e-10	3.2232e-07	290	384	10358
GO:0030154	cell differentiation	biological_process	1.0827e-09	4.3098e-07	94	384	2257
GO:0070887	cellular response to chemical stimulus	biological_process	1.2697e-09	4.9439e-07	66	384	1351
GO:0048522	positive regulation of cellular process	biological_process	1.3722e-09	5.2294e-07	117	384	3080
GO:0032633	interleukin-4 production	biological_process	2.1469e-09	8.0116e-07	9	384	25
GO:0008283	cell proliferation	biological_process	3.6022e-09	1.3168e-06	57	384	1112
GO:0050863	regulation of T cell activation	biological_process	4.6679e-09	1.6722e-06	20	384	179
GO:0050870	positive regulation of T cell activation	biological_process	5.4523e-09	1.9149e-06	16	384	113
GO:0002694	regulation of leukocyte activation	biological_process	6.6653e-09	2.2959e-06	25	384	282
GO:1903039	positive regulation of leukocyte cell-cell adhesion	biological_process	8.0455e-09	2.7191e-06	16	384	116
GO:0034112	positive regulation of homotypic cell-cell adhesion	biological_process	9.1297e-09	2.9286e-06	16	384	117
GO:0044763	single-organism cellular process	biological_process	9.1835e-09	2.9286e-06	260	384	9122
GO:0051249	regulation of lymphocyte activation	biological_process	9.2533e-09	2.9286e-06	23	384	245
GO:0046651	lymphocyte proliferation	biological_process	9.3196e-09	2.9286e-06	19	384	168
GO:1903037	regulation of leukocyte cell-cell adhesion	biological_process	9.9574e-09	3.02e-06	20	384	187
GO:0006950	response to stress	biological_process	9.9947e-09	3.02e-06	85	384	2050
GO:0050776	regulation of immune response	biological_process	1.0159e-08	3.02e-06	29	384	377
GO:0032943	mononuclear cell proliferation	biological_process	1.0285e-08	3.02e-06	19	384	169
GO:0048869	cellular developmental process	biological_process	1.05e-08	3.0335e-06	97	384	2468
GO:0051251	positive regulation of lymphocyte activation	biological_process	1.1098e-08	3.1552e-06	18	384	152
GO:0002696	positive regulation of leukocyte activation	biological_process	1.1361e-08	3.1797e-06	19	384	170
GO:0050778	positive regulation of immune response	biological_process	1.702e-08	4.6901e-06	25	384	295
GO:0071310	cellular response to organic substance	biological_process	1.8142e-08	4.9235e-06	54	384	1074
GO:0050867	positive regulation of cell activation	biological_process	2.0123e-08	5.3798e-06	19	384	176
GO:0098552	side of membrane	cellular_component	2.107e-08	5.55e-06	22	384	235
GO:0009897	external side of plasma membrane	cellular_component	2.243e-08	5.8228e-06	18	384	159
GO:0045785	positive regulation of cell adhesion	biological_process	2.2939e-08	5.8698e-06	22	384	236
GO:0070661	leukocyte proliferation	biological_process	2.4173e-08	6.0984e-06	19	384	178
GO:2000026	regulation of multicellular organismal development	biological_process	3.1438e-08	7.8212e-06	55	384	1123
GO:0032496	response to lipopolysaccharide	biological_process	3.6579e-08	8.9753e-06	17	384	146
GO:0005509	calcium ion binding	molecular_function	7.1681e-08	1.7351e-05	33	384	511
GO:1903708	positive regulation of hemopoiesis	biological_process	8.0364e-08	1.9071e-05	15	384	119
GO:0006952	defense response	biological_process	8.0916e-08	1.9071e-05	41	384	731
GO:0048584	positive regulation of response to stimulus	biological_process	8.2104e-08	1.9099e-05	56	384	1188
GO:0022409	positive regulation of cell-cell adhesion	biological_process	8.8901e-08	2.0415e-05	16	384	137
GO:0002237	response to molecule of bacterial origin	biological_process	1.0754e-07	2.4383e-05	17	384	157
GO:0002764	immune response-regulating signaling pathway	biological_process	1.1912e-07	2.6445e-05	18	384	177
GO:0001816	cytokine production	biological_process	1.1959e-07	2.6445e-05	29	384	421
GO:0030098	lymphocyte differentiation	biological_process	1.2168e-07	2.6579e-05	20	384	217
GO:0050896	response to stimulus	biological_process	1.3921e-07	3.0042e-05	182	384	5929
GO:0048583	regulation of response to stimulus	biological_process	1.4192e-07	3.0262e-05	86	384	2214
GO:1902107	positive regulation of leukocyte differentiation	biological_process	1.9818e-07	4.1652e-05	13	384	94
GO:0051179	localization	biological_process	1.9998e-07	4.1652e-05	129	384	3827
GO:0009605	response to external stimulus	biological_process	2.408e-07	4.9577e-05	59	384	1325
GO:0032673	regulation of interleukin-4 production	biological_process	2.5846e-07	5.2176e-05	7	384	21
GO:0031988	membrane-bounded vesicle	cellular_component	2.5925e-07	5.2176e-05	88	384	2317
GO:0042127	regulation of cell proliferation	biological_process	2.6247e-07	5.2237e-05	45	384	881
GO:0051094	positive regulation of developmental process	biological_process	3.6292e-07	7.1435e-05	42	384	800
GO:0050670	regulation of lymphocyte proliferation	biological_process	3.9295e-07	7.6506e-05	15	384	134
GO:0001819	positive regulation of cytokine production	biological_process	4.1832e-07	8.057e-05	21	384	256
GO:0032944	regulation of mononuclear cell proliferation	biological_process	4.3308e-07	8.2444e-05	15	384	135
GO:0002253	activation of immune response	biological_process	4.3726e-07	8.2444e-05	18	384	193
GO:0002573	myeloid leukocyte differentiation	biological_process	4.7487e-07	8.8602e-05	15	384	136
GO:0031982	vesicle	cellular_component	5.4854e-07	0.00010129	89	384	2395
GO:0040017	positive regulation of locomotion	biological_process	5.7642e-07	0.00010536	21	384	261
GO:0050839	cell adhesion molecule binding	molecular_function	5.9036e-07	0.00010681	13	384	103
GO:0070663	regulation of leukocyte proliferation	biological_process	6.3322e-07	0.00011342	15	384	139
GO:0005764	lysosome	cellular_component	7.0468e-07	0.00012497	20	384	242
GO:0000323	lytic vacuole	cellular_component	7.5215e-07	0.00013208	20	384	243
GO:0045597	positive regulation of cell differentiation	biological_process	8.5194e-07	0.00014815	32	384	542
GO:1903561	extracellular vesicle	cellular_component	9.259e-07	0.00015947	78	384	2010
GO:0043230	extracellular organelle	cellular_component	9.4367e-07	0.00016098	78	384	2011
GO:1901700	response to oxygen-containing compound	biological_process	1.091e-06	0.00018436	36	384	659
GO:0042113	B cell activation	biological_process	1.3004e-06	0.00021708	15	384	147
GO:0032753	positive regulation of interleukin-4 production	biological_process	1.3089e-06	0.00021708	6	384	17
GO:0002757	immune response-activating signal transduction	biological_process	1.4592e-06	0.00023979	16	384	168
GO:0070062	extracellular exosome	cellular_component	1.4841e-06	0.00024166	77	384	2000
GO:0065010	extracellular membrane-bounded organelle	cellular_component	1.512e-06	0.00024399	77	384	2001
GO:1903706	regulation of hemopoiesis	biological_process	1.5322e-06	0.00024505	19	384	232
GO:0051272	positive regulation of cellular component movement	biological_process	1.5971e-06	0.00025316	20	384	255
GO:1902105	regulation of leukocyte differentiation	biological_process	1.6999e-06	0.00026709	16	384	170
GO:0009617	response to bacterium	biological_process	1.8074e-06	0.00028151	20	384	257
GO:0005515	protein binding	molecular_function	1.8681e-06	0.00028846	238	384	8534
GO:0042102	positive regulation of T cell proliferation	biological_process	1.9057e-06	0.00028872	10	384	65
GO:0001817	regulation of cytokine production	biological_process	1.9094e-06	0.00028872	25	384	378
GO:0048661	positive regulation of smooth muscle cell proliferation	biological_process	1.9181e-06	0.00028872	6	384	18
GO:0005615	extracellular space	cellular_component	1.9566e-06	0.00029206	38	384	734
GO:0002768	immune response-regulating cell surface receptor signaling pathway	biological_process	2.2118e-06	0.00032743	12	384	98
GO:0000779	condensed chromosome, centromeric region	cellular_component	2.3062e-06	0.0003386	7	384	28
GO:0030217	T cell differentiation	biological_process	2.3455e-06	0.00034156	15	384	154
GO:0030335	positive regulation of cell migration	biological_process	3.2368e-06	0.00046756	19	384	244
GO:0042129	regulation of T cell proliferation	biological_process	3.3952e-06	0.00048652	12	384	102
GO:0030099	myeloid cell differentiation	biological_process	3.4396e-06	0.00048896	19	384	245
GO:0050663	cytokine secretion	biological_process	3.6968e-06	0.00052139	13	384	121
GO:0005773	vacuole	cellular_component	3.9115e-06	0.00054737	21	384	294
GO:0050793	regulation of developmental process	biological_process	4.0144e-06	0.00055741	61	384	1492
GO:0000780	condensed nuclear chromosome, centromeric region	cellular_component	4.0587e-06	0.00055922	5	384	12
GO:2000147	positive regulation of cell motility	biological_process	4.1082e-06	0.00056172	19	384	248
GO:0050671	positive regulation of lymphocyte proliferation	biological_process	4.2813e-06	0.00058096	11	384	87
GO:0032879	regulation of localization	biological_process	4.3837e-06	0.00059039	62	384	1527
GO:0032946	positive regulation of mononuclear cell proliferation	biological_process	4.7949e-06	0.00064094	11	384	88
GO:0009719	response to endogenous stimulus	biological_process	5.0446e-06	0.00066933	37	384	734
GO:0044707	single-multicellular organism process	biological_process	5.9231e-06	0.00078011	143	384	4575
GO:0051241	negative regulation of multicellular organismal process	biological_process	6.43e-06	0.00084069	34	384	654
GO:0009888	tissue development	biological_process	6.9433e-06	0.00090121	53	384	1247
GO:0070665	positive regulation of leukocyte proliferation	biological_process	7.427e-06	0.00095706	11	384	92
GO:0071363	cellular response to growth factor stimulus	biological_process	7.659e-06	0.00097991	23	384	357
GO:0005581	collagen trimer	cellular_component	8.0459e-06	0.0010221	8	384	46
GO:0031349	positive regulation of defense response	biological_process	8.5436e-06	0.0010777	15	384	171
GO:0002250	adaptive immune response	biological_process	1.0519e-05	0.0013176	14	384	153
GO:0032501	multicellular organismal process	biological_process	1.072e-05	0.0013335	146	384	4740
GO:0034097	response to cytokine	biological_process	1.0804e-05	0.0013346	21	384	314
GO:0070848	response to growth factor	biological_process	1.0978e-05	0.0013468	23	384	365
GO:0048585	negative regulation of response to stimulus	biological_process	1.1203e-05	0.0013611	41	384	883
GO:0071222	cellular response to lipopolysaccharide	biological_process	1.1246e-05	0.0013611	11	384	96
GO:0071216	cellular response to biotic stimulus	biological_process	1.3033e-05	0.0015667	12	384	116
GO:0051301	cell division	biological_process	1.6294e-05	0.0019458	19	384	273
GO:0043207	response to external biotic stimulus	biological_process	1.7457e-05	0.0020572	27	384	484
GO:0051707	response to other organism	biological_process	1.7457e-05	0.0020572	27	384	484
GO:0050851	antigen receptor-mediated signaling pathway	biological_process	1.8063e-05	0.0021146	10	384	83
GO:0006810	transport	biological_process	1.9768e-05	0.0022966	97	384	2869
GO:0042098	T cell proliferation	biological_process	1.9997e-05	0.0022966	12	384	121
GO:0071219	cellular response to molecule of bacterial origin	biological_process	2.0123e-05	0.0022966	11	384	102
GO:0005539	glycosaminoglycan binding	molecular_function	2.013e-05	0.0022966	11	384	102
GO:0009611	response to wounding	biological_process	2.1128e-05	0.0023952	24	384	407
GO:0008284	positive regulation of cell proliferation	biological_process	2.2547e-05	0.00254	27	384	491
GO:0035987	endodermal cell differentiation	biological_process	2.4272e-05	0.0027173	7	384	39
GO:0032640	tumor necrosis factor production	biological_process	2.4863e-05	0.0027491	9	384	69
GO:0032680	regulation of tumor necrosis factor production	biological_process	2.4863e-05	0.0027491	9	384	69
GO:0051270	regulation of cellular component movement	biological_process	2.559e-05	0.002812	28	384	523
GO:0051234	establishment of localization	biological_process	2.7051e-05	0.0029545	100	384	3005
GO:0032102	negative regulation of response to external stimulus	biological_process	2.8251e-05	0.0030669	15	384	189
GO:0030334	regulation of cell migration	biological_process	2.9506e-05	0.0031838	25	384	443
GO:0000940	condensed chromosome outer kinetochore	cellular_component	3.0052e-05	0.0032233	4	384	9
GO:0050707	regulation of cytokine secretion	biological_process	3.1307e-05	0.0033278	11	384	107
GO:1903555	regulation of tumor necrosis factor superfamily cytokine production	biological_process	3.1398e-05	0.0033278	9	384	71
GO:0035850	epithelial cell differentiation involved in kidney development	biological_process	3.2556e-05	0.0034018	6	384	28
GO:0030199	collagen fibril organization	biological_process	3.259e-05	0.0034018	6	384	28
GO:0051704	multi-organism process	biological_process	3.2665e-05	0.0034018	46	384	1086
GO:0007167	enzyme linked receptor protein signaling pathway	biological_process	3.3748e-05	0.0034922	28	384	531
GO:0032835	glomerulus development	biological_process	3.4091e-05	0.0034922	7	384	41
GO:0001706	endoderm formation	biological_process	3.4119e-05	0.0034922	7	384	41
GO:0060326	cell chemotaxis	biological_process	3.4385e-05	0.0034995	14	384	170
GO:0071706	tumor necrosis factor superfamily cytokine production	biological_process	3.5176e-05	0.0035545	9	384	72
GO:0032940	secretion by cell	biological_process	3.5323e-05	0.0035545	27	384	504
GO:0048519	negative regulation of biological process	biological_process	3.6064e-05	0.0036088	97	384	2911
GO:0016477	cell migration	biological_process	3.7112e-05	0.0036931	37	384	804
GO:0051050	positive regulation of transport	biological_process	3.8186e-05	0.0037758	29	384	564
GO:0032101	regulation of response to external stimulus	biological_process	3.8365e-05	0.0037758	29	384	564
GO:0072358	cardiovascular system development	biological_process	4.0163e-05	0.0039098	32	384	654
GO:0072359	circulatory system development	biological_process	4.0163e-05	0.0039098	32	384	654
GO:0009607	response to biotic stimulus	biological_process	4.0604e-05	0.0039139	27	384	508
GO:0002429	immune response-activating cell surface receptor signaling pathway	biological_process	4.0642e-05	0.0039139	10	384	91
GO:0051222	positive regulation of protein transport	biological_process	4.2892e-05	0.0041085	19	384	293
GO:0000942	condensed nuclear chromosome outer kinetochore	cellular_component	4.5418e-05	0.0043273	3	384	4
GO:0040012	regulation of locomotion	biological_process	4.6298e-05	0.0043877	27	384	512
GO:0050840	extracellular matrix binding	molecular_function	4.6986e-05	0.0044296	7	384	43
GO:0071702	organic substance transport	biological_process	4.7487e-05	0.004433	53	384	1337
GO:0051246	regulation of protein metabolic process	biological_process	4.7518e-05	0.004433	60	384	1578
GO:0018193	peptidyl-amino acid modification	biological_process	4.8841e-05	0.0045329	33	384	691
GO:0005518	collagen binding	molecular_function	5.4523e-05	0.0050096	7	384	44
GO:0006897	endocytosis	biological_process	5.4538e-05	0.0050096	19	384	298
GO:0050708	regulation of protein secretion	biological_process	5.8055e-05	0.0053055	16	384	225
GO:0002252	immune effector process	biological_process	5.8674e-05	0.0053349	24	384	434
GO:0006468	protein phosphorylation	biological_process	5.9922e-05	0.0054208	50	384	1247
GO:0044420	extracellular matrix component	cellular_component	6.0475e-05	0.0054279	9	384	77
GO:2000145	regulation of cell motility	biological_process	6.0606e-05	0.0054279	25	384	463
GO:0044765	single-organism transport	biological_process	6.2384e-05	0.0055593	84	384	2461
GO:0009306	protein secretion	biological_process	6.6297e-05	0.0058788	18	384	277
GO:0002460	adaptive immune response based on somatic recombination of immune receptors built from immunoglobulin superfamily domains	biological_process	6.8746e-05	0.0060659	12	384	137
GO:0033993	response to lipid	biological_process	7.1464e-05	0.0062748	21	384	357
GO:0071495	cellular response to endogenous stimulus	biological_process	7.2247e-05	0.0063088	30	384	614
GO:0043534	blood vessel endothelial cell migration	biological_process	7.2555e-05	0.0063088	7	384	46
GO:1903034	regulation of response to wounding	biological_process	7.7519e-05	0.0067078	17	384	255
GO:0045639	positive regulation of myeloid cell differentiation	biological_process	8.4519e-05	0.0072409	8	384	63
GO:0006959	humoral immune response	biological_process	8.4788e-05	0.0072409	8	384	63
GO:0035710	CD4-positive, alpha-beta T cell activation	biological_process	8.4892e-05	0.0072409	7	384	47
GO:0005102	receptor binding	molecular_function	8.6088e-05	0.0073081	38	384	869
GO:0001934	positive regulation of protein phosphorylation	biological_process	9.14e-05	0.0077225	27	384	533
GO:0045087	innate immune response	biological_process	9.3811e-05	0.0078889	17	384	259
GO:0045595	regulation of cell differentiation	biological_process	9.5211e-05	0.0079091	42	384	1003
GO:0065009	regulation of molecular function	biological_process	9.5352e-05	0.0079091	59	384	1582
GO:0008037	cell recognition	biological_process	9.5593e-05	0.0079091	8	384	64
GO:0051347	positive regulation of transferase activity	biological_process	9.5817e-05	0.0079091	19	384	311
GO:0010631	epithelial cell migration	biological_process	0.00010254	0.0083984	13	384	165
GO:0018209	peptidyl-serine modification	biological_process	0.0001028	0.0083984	13	384	165
GO:0061045	negative regulation of wound healing	biological_process	0.00010338	0.0083984	6	384	34
GO:0005201	extracellular matrix structural constituent	molecular_function	0.00010362	0.0083984	6	384	34
GO:0070492	oligosaccharide binding	molecular_function	0.00011121	0.0089339	3	384	5
GO:0009966	regulation of signal transduction	biological_process	0.00011123	0.0089339	60	384	1626
GO:0072160	nephron tubule epithelial cell differentiation	biological_process	0.00011229	0.0089794	4	384	12
GO:0051247	positive regulation of protein metabolic process	biological_process	0.00011447	0.0091125	38	384	881
GO:0090132	epithelium migration	biological_process	0.00011584	0.0091813	13	384	167
GO:0018108	peptidyl-tyrosine phosphorylation	biological_process	0.00011654	0.0091831	15	384	214
GO:0007179	transforming growth factor beta receptor signaling pathway	biological_process	0.00011717	0.0091831	10	384	103
GO:0032880	regulation of protein localization	biological_process	0.0001174	0.0091831	29	384	601
GO:0050715	positive regulation of cytokine secretion	biological_process	0.00011806	0.0091942	8	384	66
GO:0046631	alpha-beta T cell activation	biological_process	0.00012016	0.0093171	9	384	84
GO:0040011	locomotion	biological_process	0.00012912	0.0099343	42	384	1017
GO:0018212	peptidyl-tyrosine modification	biological_process	0.00012923	0.0099343	15	384	216
GO:0001944	vasculature development	biological_process	0.00013279	0.010142	23	384	429
GO:1902578	single-organism localization	biological_process	0.00013306	0.010142	87	384	2628
GO:0000775	chromosome, centromeric region	cellular_component	0.00013776	0.010456	10	384	105
GO:0050714	positive regulation of protein secretion	biological_process	0.0001398	0.010566	11	384	126
GO:0071560	cellular response to transforming growth factor beta stimulus	biological_process	0.00014135	0.010638	11	384	126
GO:0051784	negative regulation of nuclear division	biological_process	0.00014213	0.010646	6	384	36
GO:0032615	interleukin-12 production	biological_process	0.00014336	0.010646	6	384	36
GO:0048660	regulation of smooth muscle cell proliferation	biological_process	0.00014354	0.010646	6	384	36
GO:0032760	positive regulation of tumor necrosis factor production	biological_process	0.00014389	0.010646	6	384	36
GO:0061005	cell differentiation involved in kidney development	biological_process	0.00014442	0.010646	6	384	36
GO:0071559	response to transforming growth factor beta	biological_process	0.00015167	0.011101	11	384	127
GO:0051049	regulation of transport	biological_process	0.00015184	0.011101	43	384	1058
GO:0090130	tissue migration	biological_process	0.0001558	0.011298	13	384	172
GO:0051302	regulation of cell division	biological_process	0.0001558	0.011298	13	384	172
GO:0002822	regulation of adaptive immune response based on somatic recombination of immune receptors built from immunoglobulin superfamily domains	biological_process	0.00015771	0.011391	9	384	87
GO:1903557	positive regulation of tumor necrosis factor superfamily cytokine production	biological_process	0.00016851	0.01208	6	384	37
GO:0097285	cell-type specific apoptotic process	biological_process	0.0001686	0.01208	17	384	272
GO:0031347	regulation of defense response	biological_process	0.00017137	0.012229	21	384	380
GO:0080134	regulation of response to stress	biological_process	0.00017549	0.01244	36	384	835
GO:0048523	negative regulation of cellular process	biological_process	0.00017572	0.01244	88	384	2687
GO:0005886	plasma membrane	cellular_component	0.00018129	0.012784	95	384	2957
GO:0030198	extracellular matrix organization	biological_process	0.00018488	0.012982	12	384	152
GO:0051223	regulation of protein transport	biological_process	0.00018554	0.012982	24	384	468
GO:0048870	cell motility	biological_process	0.00019065	0.013236	37	384	871
GO:0051674	localization of cell	biological_process	0.00019065	0.013236	37	384	871
GO:0042327	positive regulation of phosphorylation	biological_process	0.00019337	0.013373	27	384	558
GO:0071944	cell periphery	cellular_component	0.0001953	0.013441	97	384	3040
GO:0048659	smooth muscle cell proliferation	biological_process	0.00019589	0.013441	6	384	38
GO:0043062	extracellular structure organization	biological_process	0.00019661	0.013441	12	384	153
GO:0043542	endothelial cell migration	biological_process	0.00020126	0.013707	10	384	110
GO:0001568	blood vessel development	biological_process	0.00020978	0.014233	22	384	414
GO:0043537	negative regulation of blood vessel endothelial cell migration	biological_process	0.00021377	0.01445	4	384	14
GO:0051783	regulation of nuclear division	biological_process	0.00021681	0.01456	10	384	111
GO:0051716	cellular response to stimulus	biological_process	0.00021813	0.01456	149	384	5132
GO:0032656	regulation of interleukin-13 production	biological_process	0.00021904	0.01456	4	384	14
GO:0042221	response to chemical	biological_process	0.00021912	0.01456	85	384	2590
GO:0000778	condensed nuclear chromosome kinetochore	cellular_component	0.00022002	0.01456	3	384	6
GO:0007059	chromosome segregation	biological_process	0.00022028	0.01456	14	384	202
GO:0006954	inflammatory response	biological_process	0.00022347	0.014716	18	384	305
GO:0023056	positive regulation of signaling	biological_process	0.00022502	0.014764	39	384	944
GO:0002763	positive regulation of myeloid leukocyte differentiation	biological_process	0.00022639	0.0148	6	384	39
GO:0002292	T cell differentiation involved in immune response	biological_process	0.00022791	0.014845	6	384	39
GO:0008150	biological_process	biological_process	0.00022969	0.014907	333	384	13493
GO:0042100	B cell proliferation	biological_process	0.00023337	0.01505	7	384	55
GO:0038024	cargo receptor activity	molecular_function	0.00023381	0.01505	7	384	55
GO:0045621	positive regulation of lymphocyte differentiation	biological_process	0.00023442	0.01505	7	384	55
GO:0044877	macromolecular complex binding	molecular_function	0.00025627	0.016372	38	384	917
GO:0032103	positive regulation of response to external stimulus	biological_process	0.00025742	0.016372	13	384	181
GO:0045637	regulation of myeloid cell differentiation	biological_process	0.00025775	0.016372	11	384	135
GO:2000514	regulation of CD4-positive, alpha-beta T cell activation	biological_process	0.00026144	0.016548	5	384	26
GO:0070613	regulation of protein processing	biological_process	0.00026335	0.016609	6	384	40
GO:0000776	kinetochore	cellular_component	0.00026808	0.016848	8	384	74
GO:0030162	regulation of proteolysis	biological_process	0.00027002	0.0169	21	384	393
GO:0050866	negative regulation of cell activation	biological_process	0.00027078	0.0169	10	384	114
GO:0006928	movement of cell or subcellular component	biological_process	0.0002738	0.017029	44	384	1121
GO:0065007	biological regulation	biological_process	0.00027755	0.017203	220	384	8195
GO:0002819	regulation of adaptive immune response	biological_process	0.00028458	0.017577	9	384	94
GO:0030574	collagen catabolic process	biological_process	0.00029026	0.01766	4	384	15
GO:0010562	positive regulation of phosphorus metabolic process	biological_process	0.00029033	0.01766	29	384	634
GO:0045937	positive regulation of phosphate metabolic process	biological_process	0.00029033	0.01766	29	384	634
GO:0051897	positive regulation of protein kinase B signaling	biological_process	0.00029163	0.01766	7	384	57
GO:0044712	single-organism catabolic process	biological_process	0.0002931	0.01766	31	384	697
GO:0032616	interleukin-13 production	biological_process	0.00029335	0.01766	4	384	15
GO:0098644	complex of collagen trimers	cellular_component	0.00029335	0.01766	4	384	15
GO:0007492	endoderm development	biological_process	0.00029381	0.01766	7	384	57
GO:0031401	positive regulation of protein modification process	biological_process	0.0002964	0.017756	30	384	666
GO:1903317	regulation of protein maturation	biological_process	0.00030267	0.018035	6	384	41
GO:0032403	protein complex binding	molecular_function	0.00030306	0.018035	27	384	574
GO:0030195	negative regulation of blood coagulation	biological_process	0.00031397	0.018561	5	384	27
GO:1900047	negative regulation of hemostasis	biological_process	0.00031397	0.018561	5	384	27
GO:0010647	positive regulation of cell communication	biological_process	0.00031503	0.018562	39	384	960
GO:0010634	positive regulation of epithelial cell migration	biological_process	0.0003227	0.018951	8	384	76
GO:0001655	urogenital system development	biological_process	0.00032415	0.018975	15	384	235
GO:0046903	secretion	biological_process	0.00032822	0.01915	27	384	577
GO:0009967	positive regulation of signal transduction	biological_process	0.00032931	0.019151	36	384	863
GO:0002366	leukocyte activation involved in immune response	biological_process	0.00033376	0.019347	11	384	139
GO:0050789	regulation of biological process	biological_process	0.00034064	0.019682	212	384	7866
GO:0043367	CD4-positive, alpha-beta T cell differentiation	biological_process	0.00034704	0.019988	6	384	42
GO:0032609	interferon-gamma production	biological_process	0.00035234	0.020228	8	384	77
GO:0060429	epithelium development	biological_process	0.00036621	0.020957	33	384	770
GO:0071345	cellular response to cytokine stimulus	biological_process	0.0003677	0.020975	16	384	264
GO:0002263	cell activation involved in immune response	biological_process	0.0003774	0.021409	11	384	141
GO:0007178	transmembrane receptor protein serine/threonine kinase signaling pathway	biological_process	0.00037788	0.021409	14	384	213
GO:0001771	immunological synapse formation	biological_process	0.0003789	0.021409	3	384	7
GO:0002761	regulation of myeloid leukocyte differentiation	biological_process	0.00038311	0.02158	8	384	78
GO:0048646	anatomical structure formation involved in morphogenesis	biological_process	0.00040853	0.022875	35	384	840
GO:0044093	positive regulation of molecular function	biological_process	0.00040867	0.022875	37	384	906
GO:0032268	regulation of cellular protein metabolic process	biological_process	0.00041298	0.023044	53	384	1457
GO:0010604	positive regulation of macromolecule metabolic process	biological_process	0.00041678	0.023184	64	384	1854
GO:0005488	binding	molecular_function	0.00042019	0.023297	288	384	11349
GO:0050673	epithelial cell proliferation	biological_process	0.00042141	0.023297	15	384	241
GO:0009968	negative regulation of signal transduction	biological_process	0.00043046	0.023724	30	384	681
GO:0016042	lipid catabolic process	biological_process	0.00046583	0.025595	12	384	168
GO:0033674	positive regulation of kinase activity	biological_process	0.00047113	0.025807	16	384	270
GO:0045860	positive regulation of protein kinase activity	biological_process	0.00047978	0.026201	15	384	244
GO:0031295	T cell costimulation	biological_process	0.00049254	0.02662	4	384	17
GO:0014910	regulation of smooth muscle cell migration	biological_process	0.00049256	0.02662	4	384	17
GO:2000516	positive regulation of CD4-positive, alpha-beta T cell activation	biological_process	0.00049329	0.02662	4	384	17
GO:0032674	regulation of interleukin-5 production	biological_process	0.0004934	0.02662	4	384	17
GO:0046632	alpha-beta T cell differentiation	biological_process	0.00049593	0.026676	7	384	62
GO:0061041	regulation of wound healing	biological_process	0.00049833	0.026725	8	384	81
GO:0031399	regulation of protein modification process	biological_process	0.00050384	0.026878	42	384	1085
GO:0014012	peripheral nervous system axon regeneration	biological_process	0.00051469	0.026878	2	384	2
GO:0035712	T-helper 2 cell activation	biological_process	0.00051469	0.026878	2	384	2
GO:2000569	regulation of T-helper 2 cell activation	biological_process	0.00051469	0.026878	2	384	2
GO:2000570	positive regulation of T-helper 2 cell activation	biological_process	0.00051469	0.026878	2	384	2
GO:0004720	protein-lysine 6-oxidase activity	molecular_function	0.00051469	0.026878	2	384	2
GO:0038085	vascular endothelial growth factor binding	molecular_function	0.00051469	0.026878	2	384	2
GO:0005588	collagen type V trimer	cellular_component	0.00051469	0.026878	2	384	2
GO:0046098	guanine metabolic process	biological_process	0.00051469	0.026878	2	384	2
GO:0032653	regulation of interleukin-10 production	biological_process	0.00052202	0.027063	5	384	30
GO:0072006	nephron development	biological_process	0.00052268	0.027063	9	384	102
GO:0031577	spindle checkpoint	biological_process	0.00052415	0.027063	5	384	30
GO:0050819	negative regulation of coagulation	biological_process	0.00052428	0.027063	5	384	30
GO:0032270	positive regulation of cellular protein metabolic process	biological_process	0.00052672	0.027111	34	384	819
GO:0048520	positive regulation of behavior	biological_process	0.00053789	0.027528	8	384	82
GO:0015849	organic acid transport	biological_process	0.0005379	0.027528	11	384	147
GO:0050794	regulation of cellular process	biological_process	0.00054151	0.027634	202	384	7483
GO:0030316	osteoclast differentiation	biological_process	0.00054378	0.027671	7	384	63
GO:0008285	negative regulation of cell proliferation	biological_process	0.00055531	0.028178	20	384	386
GO:0070201	regulation of establishment of protein localization	biological_process	0.00056033	0.028352	24	384	505
GO:0010632	regulation of epithelial cell migration	biological_process	0.00056499	0.028494	10	384	125
GO:1903530	regulation of secretion by cell	biological_process	0.00056659	0.028494	19	384	358
GO:1901701	cellular response to oxygen-containing compound	biological_process	0.00056791	0.028494	23	384	475
GO:2000353	positive regulation of endothelial cell apoptotic process	biological_process	0.00057261	0.02865	3	384	8
GO:0009653	anatomical structure morphogenesis	biological_process	0.00057915	0.028896	61	384	1767
GO:0044706	multi-multicellular organism process	biological_process	0.00058768	0.029241	8	384	83
GO:0014911	positive regulation of smooth muscle cell migration	biological_process	0.00059819	0.029681	3	384	8
GO:0002504	antigen processing and presentation of peptide or polysaccharide antigen via MHC class II	biological_process	0.0006078	0.030074	4	384	18
GO:0044243	multicellular organismal catabolic process	biological_process	0.00061767	0.030478	4	384	18
GO:0031294	lymphocyte costimulation	biological_process	0.00062205	0.030493	4	384	18
GO:0010800	positive regulation of peptidyl-threonine phosphorylation	biological_process	0.00062304	0.030493	4	384	18
GO:0032634	interleukin-5 production	biological_process	0.00062307	0.030493	4	384	18
GO:0051782	negative regulation of cell division	biological_process	0.00063788	0.031133	6	384	47
GO:0000793	condensed chromosome	cellular_component	0.00064552	0.031346	9	384	105
GO:0045582	positive regulation of T cell differentiation	biological_process	0.00064575	0.031346	6	384	47
GO:0006935	chemotaxis	biological_process	0.0006602	0.031961	18	384	334
GO:0042330	taxis	biological_process	0.00068351	0.032963	18	384	335
GO:0023057	negative regulation of signaling	biological_process	0.00068483	0.032963	31	384	733
GO:0010243	response to organonitrogen compound	biological_process	0.00068643	0.032963	17	384	307
GO:1902533	positive regulation of intracellular signal transduction	biological_process	0.00070314	0.033638	26	384	575
GO:0051604	protein maturation	biological_process	0.00070614	0.033638	12	384	176
GO:0043535	regulation of blood vessel endothelial cell migration	biological_process	0.00070694	0.033638	5	384	32
GO:0023051	regulation of signaling	biological_process	0.00070798	0.033638	62	384	1818
GO:0002286	T cell activation involved in immune response	biological_process	0.00072243	0.034194	6	384	48
GO:0030054	cell junction	cellular_component	0.00072351	0.034194	28	384	639
GO:0010646	regulation of cell communication	biological_process	0.0007295	0.034386	63	384	1857
GO:0015711	organic anion transport	biological_process	0.00073688	0.034643	13	384	202
GO:0031325	positive regulation of cellular metabolic process	biological_process	0.00076156	0.035625	63	384	1860
GO:0043066	negative regulation of apoptotic process	biological_process	0.00076174	0.035625	24	384	516
GO:0010543	regulation of platelet activation	biological_process	0.0007734	0.036055	4	384	19
GO:0048485	sympathetic nervous system development	biological_process	0.00077496	0.036055	4	384	19
GO:0035295	tube development	biological_process	0.00078128	0.036255	22	384	456
GO:0050731	positive regulation of peptidyl-tyrosine phosphorylation	biological_process	0.00078973	0.036552	9	384	108
GO:0046634	regulation of alpha-beta T cell activation	biological_process	0.00080955	0.037373	6	384	49
GO:0097367	carbohydrate derivative binding	molecular_function	0.00081211	0.037394	60	384	1754
GO:0032613	interleukin-10 production	biological_process	0.0008228	0.037743	5	384	33
GO:0030071	regulation of mitotic metaphase/anaphase transition	biological_process	0.00082673	0.037743	5	384	33
GO:1902099	regulation of metaphase/anaphase transition of cell cycle	biological_process	0.00082673	0.037743	5	384	33
GO:0042093	T-helper cell differentiation	biological_process	0.00082811	0.037743	5	384	33
GO:0018105	peptidyl-serine phosphorylation	biological_process	0.00083722	0.038062	11	384	155
GO:0043085	positive regulation of catalytic activity	biological_process	0.00084513	0.038324	30	384	710
GO:0010544	negative regulation of platelet activation	biological_process	0.00087902	0.039609	3	384	9
GO:0045295	gamma-catenin binding	molecular_function	0.00088232	0.039609	3	384	9
GO:0005583	fibrillar collagen trimer	cellular_component	0.00088232	0.039609	3	384	9
GO:0098643	banded collagen fibril	cellular_component	0.00088232	0.039609	3	384	9
GO:0033044	regulation of chromosome organization	biological_process	0.00088569	0.039661	13	384	206
GO:0043069	negative regulation of programmed cell death	biological_process	0.00091739	0.040978	24	384	523
GO:0032963	collagen metabolic process	biological_process	0.0009368	0.041741	5	384	34
GO:0032655	regulation of interleukin-12 production	biological_process	0.00094624	0.041905	5	384	34
GO:0007091	metaphase/anaphase transition of mitotic cell cycle	biological_process	0.00095148	0.041905	5	384	34
GO:0010965	regulation of mitotic sister chromatid separation	biological_process	0.00095148	0.041905	5	384	34
GO:0044784	metaphase/anaphase transition of cell cycle	biological_process	0.00095148	0.041905	5	384	34
GO:0002294	CD4-positive, alpha-beta T cell differentiation involved in immune response	biological_process	0.00095301	0.041905	5	384	34
GO:0001667	ameboidal-type cell migration	biological_process	0.00095452	0.041905	14	384	234
GO:0010648	negative regulation of cell communication	biological_process	0.00097273	0.0426	31	384	749
GO:0050790	regulation of catalytic activity	biological_process	0.00099669	0.043543	45	384	1228
GO:0060548	negative regulation of cell death	biological_process	0.0010125	0.044126	25	384	558
GO:0001935	endothelial cell proliferation	biological_process	0.0010258	0.044598	7	384	70
GO:0050900	leukocyte migration	biological_process	0.0010359	0.044927	12	384	184
GO:0044259	multicellular organismal macromolecule metabolic process	biological_process	0.0010734	0.046442	5	384	35
GO:0002287	alpha-beta T cell activation involved in immune response	biological_process	0.0010914	0.046992	5	384	35
GO:0002293	alpha-beta T cell differentiation involved in immune response	biological_process	0.0010914	0.046992	5	384	35
GO:0071241	cellular response to inorganic substance	biological_process	0.0011162	0.047945	7	384	71
GO:0033002	muscle cell proliferation	biological_process	0.0011225	0.048019	7	384	71
GO:0032649	regulation of interferon-gamma production	biological_process	0.0011233	0.048019	7	384	71
GO:0032735	positive regulation of interleukin-12 production	biological_process	0.0011438	0.048689	4	384	21
GO:0051180	vitamin transport	biological_process	0.0011444	0.048689	4	384	21
GO:0000777	condensed chromosome kinetochore	cellular_component	0.0011528	0.048833	4	384	21
GO:0014909	smooth muscle cell migration	biological_process	0.0011532	0.048833	4	384	21
GO:0010038	response to metal ion	biological_process	0.0011586	0.048947	9	384	114
