# Supplementary material for: Functional lncRNA-miRNA-mRNA networks in rabbit carotid atherosclerosis
Source: Aging (Albany NY). 2020 Feb 11;12(3):2798–813. doi: 10.18632/aging.102778 (PMC7041763; doi:10.18632/aging.102778)
Supplement: Supplementary Table 6 [file aging-12-102778-s002..xls]

## Sheet: Sheet1
Supplementary Table 6. KEGG enrichment analysis of the lncRNA-miRNA-mRNA-targeted genes.
#Term	Database	ID	Input number	Background number	P-Value	Corrected P-Value
Cell adhesion molecules (CAMs)	KEGG PATHWAY	ocu04514	18	144	3.23e-05	0.0034065
Hematopoietic cell lineage	KEGG PATHWAY	ocu04640	13	79	3.28e-05	0.0034065
Asthma	KEGG PATHWAY	ocu05310	7	28	0.000248535	0.0152593
Staphylococcus aureus infection	KEGG PATHWAY	ocu05150	9	50	0.000293448	0.0152593
Autoimmune thyroid disease	KEGG PATHWAY	ocu05320	9	54	0.000484663	0.015939
Allograft rejection	KEGG PATHWAY	ocu05330	8	43	0.000521193	0.015939
Rheumatoid arthritis	KEGG PATHWAY	ocu05323	12	94	0.000544065	0.015939
Intestinal immune network for IgA production	KEGG PATHWAY	ocu04672	9	56	0.00061304	0.015939
T cell receptor signaling pathway	KEGG PATHWAY	ocu04660	12	103	0.00112791	0.0260673
Viral myocarditis	KEGG PATHWAY	ocu05416	9	71	0.00272402	0.0566597
Primary immunodeficiency	KEGG PATHWAY	ocu05340	6	35	0.00371244	0.0701988
Cytokine-cytokine receptor interaction	KEGG PATHWAY	ocu04060	18	229	0.00492556	0.078875
Amoebiasis	KEGG PATHWAY	ocu05146	11	110	0.00522628	0.078875
Graft-versus-host disease	KEGG PATHWAY	ocu05332	6	38	0.00530889	0.078875
Lysosome	KEGG PATHWAY	ocu04142	11	116	0.00747279	0.103623
Tuberculosis	KEGG PATHWAY	ocu05152	15	188	0.0086124	0.108332
ECM-receptor interaction	KEGG PATHWAY	ocu04512	9	87	0.00906407	0.108332
Natural killer cell mediated cytotoxicity	KEGG PATHWAY	ocu04650	10	104	0.00963414	0.108332
African trypanosomiasis	KEGG PATHWAY	ocu05143	5	31	0.00989568	0.108332
Leishmaniasis	KEGG PATHWAY	ocu05140	8	76	0.0123426	0.128363
Measles	KEGG PATHWAY	ocu05162	11	127	0.0134709	0.130545
Bladder cancer	KEGG PATHWAY	ocu05219	5	34	0.0138076	0.130545
Type I diabetes mellitus	KEGG PATHWAY	ocu04940	6	52	0.0197546	0.17865
Phagosome	KEGG PATHWAY	ocu04145	12	156	0.0223077	0.193333
Systemic lupus erythematosus	KEGG PATHWAY	ocu05322	11	140	0.0245955	0.204635
Protein digestion and absorption	KEGG PATHWAY	ocu04974	9	107	0.0280349	0.224279
Chagas disease (American trypanosomiasis)	KEGG PATHWAY	ocu05142	9	109	0.0308457	0.233034
PI3K-Akt signaling pathway	KEGG PATHWAY	ocu04151	20	324	0.03137	0.233034
Amphetamine addiction	KEGG PATHWAY	ocu05031	6	59	0.0325436	0.233416
Osteoclast differentiation	KEGG PATHWAY	ocu04380	10	131	0.0364821	0.24622
Focal adhesion	KEGG PATHWAY	ocu04510	14	208	0.0366962	0.24622
Inflammatory mediator regulation of TRP channels	KEGG PATHWAY	ocu04750	8	96	0.0387258	0.251718
Steroid biosynthesis	KEGG PATHWAY	ocu00100	3	19	0.0458113	0.28875
