# Supplementary material for: Functional lncRNA-miRNA-mRNA networks in rabbit carotid atherosclerosis
Source: Aging (Albany NY). 2020 Feb 11;12(3):2798–813. doi: 10.18632/aging.102778 (PMC7041763; doi:10.18632/aging.102778)
Supplement: Supplementary Table 7 [file aging-12-102778-s003..xlsx]

## Sheet: Sheet1
Supplementary Table 7. The lncRNA-miRNA-mRNA network. LncRNA (up in AS rabbits)-miRNA (down in AS rabbits)-mRNA (up in AS rabbits).
miRNA id	lncRNA id	cor(miRNAvslncRNA)	pval	mRNA id	gene_name	cor(miRNAvsmRNA)	pval
ocu-miR-204-5p	XLOC_061964	-0.860636	0.0277801	ENSOCUG00000010718	TIMP1	-0.949046	0.00382838
ocu-miR-204-5p	XLOC_054118	-0.913541	0.0108897	ENSOCUG00000010718		-0.949046	0.00382838
ocu-miR-204-5p	XLOC_063297	-0.898848	0.0148302	ENSOCUG00000010718		-0.949046	0.00382838
ocu-miR-204-5p	XLOC_042760	-0.827467	0.0420834	ENSOCUG00000010718		-0.949046	0.00382838
ocu-miR-204-5p	XLOC_061964	-0.860636	0.0277801	ENSOCUG00000015020	COL5A2	-0.91438	0.0106823
ocu-miR-204-5p	XLOC_054118	-0.913541	0.0108897	ENSOCUG00000015020		-0.91438	0.0106823
ocu-miR-204-5p	XLOC_063297	-0.898848	0.0148302	ENSOCUG00000015020		-0.91438	0.0106823
ocu-miR-204-5p	XLOC_042760	-0.827467	0.0420834	ENSOCUG00000015020		-0.91438	0.0106823
ocu-miR-204-5p	XLOC_061964	-0.860636	0.0277801	ENSOCUG00000016798	CLEC7A	-0.924759	0.00827879
ocu-miR-204-5p	XLOC_054118	-0.913541	0.0108897	ENSOCUG00000016798		-0.924759	0.00827879
ocu-miR-7a-5p	XLOC_054118	-0.826394	0.0425923	ENSOCUG00000016798		-0.860611	0.0277897
ocu-miR-7a-5p	XLOC_054413	-0.829853	0.040962	ENSOCUG00000016798		-0.860611	0.0277897
ocu-miR-204-5p	XLOC_063297	-0.898848	0.0148302	ENSOCUG00000016798		-0.924759	0.00827879
ocu-miR-204-5p	XLOC_042760	-0.827467	0.0420834	ENSOCUG00000016798		-0.924759	0.00827879
ocu-miR-204-5p	XLOC_061964	-0.860636	0.0277801	ENSOCUG00000003868	SLC38A7	-0.824094	0.0436927
ocu-miR-204-5p	XLOC_054118	-0.913541	0.0108897	ENSOCUG00000003868		-0.824094	0.0436927
ocu-miR-96-5p	XLOC_054118	-0.812316	0.0495325	ENSOCUG00000003868		-0.921014	0.00911185
ocu-miR-204-5p	XLOC_063297	-0.898848	0.0148302	ENSOCUG00000003868		-0.824094	0.0436927
ocu-miR-204-5p	XLOC_042760	-0.827467	0.0420834	ENSOCUG00000003868		-0.824094	0.0436927
ocu-miR-183-5p	XLOC_030217	-0.836928	0.0377203	ENSOCUG00000003868		-0.861267	0.027535
ocu-miR-96-5p	XLOC_030217	-0.857706	0.0289308	ENSOCUG00000003868		-0.921014	0.00911185
ocu-miR-185-5p	XLOC_063297	-0.840278	0.0362294	ENSOCUG00000011500	TNC	-0.892731	0.0166427
ocu-miR-185-5p	XLOC_062719	-0.879786	0.0208086	ENSOCUG00000011500		-0.892731	0.0166427
ocu-miR-7a-5p	XLOC_054118	-0.826394	0.0425923	ENSOCUG00000009918	SCARA3	-0.84609	0.0337094
ocu-miR-7a-5p	XLOC_054118	-0.826394	0.0425923	ENSOCUG00000009918		-0.824282	0.0436022
ocu-miR-7a-5p	XLOC_054413	-0.829853	0.040962	ENSOCUG00000009918		-0.84609	0.0337094
ocu-miR-7a-5p	XLOC_054413	-0.829853	0.040962	ENSOCUG00000009918		-0.824282	0.0436022
ocu-miR-185-5p	XLOC_063297	-0.840278	0.0362294	ENSOCUG00000023521	AIF1	-0.917761	0.00986682
ocu-miR-185-5p	XLOC_062719	-0.879786	0.0208086	ENSOCUG00000023521		-0.917761	0.00986682
ocu-miR-185-5p	XLOC_063297	-0.840278	0.0362294	ENSOCUG00000007896	MILR1	-0.908385	0.0122055
ocu-miR-185-5p	XLOC_062719	-0.879786	0.0208086	ENSOCUG00000007896		-0.908385	0.0122055
ocu-miR-204-5p	XLOC_061964	-0.860636	0.0277801	ENSOCUG00000004744	SNX10	-0.818676	0.0463369
ocu-miR-204-5p	XLOC_054118	-0.913541	0.0108897	ENSOCUG00000004744		-0.818676	0.0463369
ocu-miR-204-5p	XLOC_063297	-0.898848	0.0148302	ENSOCUG00000004744		-0.818676	0.0463369
ocu-miR-204-5p	XLOC_042760	-0.827467	0.0420834	ENSOCUG00000004744		-0.818676	0.0463369
ocu-miR-204-5p	XLOC_061964	-0.860636	0.0277801	ENSOCUG00000015835	-	-0.829807	0.0409836
ocu-miR-204-5p	XLOC_054118	-0.913541	0.0108897	ENSOCUG00000015835		-0.829807	0.0409836
ocu-miR-204-5p	XLOC_063297	-0.898848	0.0148302	ENSOCUG00000015835		-0.829807	0.0409836
ocu-miR-204-5p	XLOC_042760	-0.827467	0.0420834	ENSOCUG00000015835		-0.829807	0.0409836
ocu-miR-7a-5p	XLOC_054118	-0.826394	0.0425923	ENSOCUG00000013254	IFNGR1	-0.921998	0.0088892
ocu-miR-7a-5p	XLOC_054413	-0.829853	0.040962	ENSOCUG00000013254		-0.921998	0.0088892
ocu-miR-185-5p	XLOC_063297	-0.840278	0.0362294	ENSOCUG00000011090	CTSK	-0.901244	0.0141475
ocu-miR-185-5p	XLOC_062719	-0.879786	0.0208086	ENSOCUG00000011090		-0.901244	0.0141475
ocu-miR-185-5p	XLOC_063297	-0.840278	0.0362294	ENSOCUG00000011085	CTSS	-0.873287	0.0230669
ocu-miR-185-5p	XLOC_062719	-0.879786	0.0208086	ENSOCUG00000011085		-0.873287	0.0230669
ocu-miR-96-5p	XLOC_054118	-0.812316	0.0495325	ENSOCUG00000021584	DOK3	-0.845027	0.0341638
ocu-miR-96-5p	XLOC_030217	-0.857706	0.0289308	ENSOCUG00000021584		-0.845027	0.0341638
ocu-miR-96-5p	XLOC_054118	-0.812316	0.0495325	ENSOCUG00000026988	CHI3L1	-0.842999	0.0350391
ocu-miR-96-5p	XLOC_030217	-0.857706	0.0289308	ENSOCUG00000026988		-0.842999	0.0350391
ocu-miR-204-5p	XLOC_061964	-0.860636	0.0277801	ENSOCUG00000005345	NCEH1	-0.846661	0.0334667
ocu-miR-204-5p	XLOC_054118	-0.913541	0.0108897	ENSOCUG00000005345		-0.846661	0.0334667
ocu-miR-204-5p	XLOC_063297	-0.898848	0.0148302	ENSOCUG00000005345		-0.846661	0.0334667
ocu-miR-204-5p	XLOC_042760	-0.827467	0.0420834	ENSOCUG00000005345		-0.846661	0.0334667
ocu-miR-96-5p	XLOC_054118	-0.812316	0.0495325	ENSOCUG00000008204	SOAT1	-0.843266	0.0349232
ocu-miR-96-5p	XLOC_030217	-0.857706	0.0289308	ENSOCUG00000008204		-0.843266	0.0349232
ocu-miR-96-5p	XLOC_054118	-0.812316	0.0495325	ENSOCUG00000016580	CTSB	-0.864297	0.0263735
ocu-miR-185-5p	XLOC_063297	-0.840278	0.0362294	ENSOCUG00000016580		-0.841229	0.0358114
ocu-miR-185-5p	XLOC_062719	-0.879786	0.0208086	ENSOCUG00000016580		-0.841229	0.0358114
ocu-miR-96-5p	XLOC_030217	-0.857706	0.0289308	ENSOCUG00000016580		-0.864297	0.0263735
ocu-miR-185-5p	XLOC_063297	-0.840278	0.0362294	ENSOCUG00000012244	PLIN2	-0.895171	0.0159077
ocu-miR-185-5p	XLOC_062719	-0.879786	0.0208086	ENSOCUG00000012244		-0.895171	0.0159077
ocu-miR-7a-5p	XLOC_054118	-0.826394	0.0425923	ENSOCUG00000004895	ADAMTSL1	-0.933768	0.00643471
ocu-miR-7a-5p	XLOC_054413	-0.829853	0.040962	ENSOCUG00000004895		-0.933768	0.00643471
ocu-miR-96-5p	XLOC_054118	-0.812316	0.0495325	ENSOCUG00000013382	STX3	-0.831755	0.0400784
ocu-miR-185-5p	XLOC_063297	-0.840278	0.0362294	ENSOCUG00000013382		-0.8373	0.0375537
ocu-miR-185-5p	XLOC_062719	-0.879786	0.0208086	ENSOCUG00000013382		-0.8373	0.0375537
ocu-miR-96-5p	XLOC_030217	-0.857706	0.0289308	ENSOCUG00000013382		-0.831755	0.0400784
ocu-miR-185-5p	XLOC_063297	-0.840278	0.0362294	ENSOCUG00000010785	-	-0.835221	0.0384913
ocu-miR-185-5p	XLOC_062719	-0.879786	0.0208086	ENSOCUG00000010785		-0.835221	0.0384913
ocu-miR-185-5p	XLOC_063297	-0.840278	0.0362294	ENSOCUG00000009108	NEK6	-0.875878	0.0221532
ocu-miR-185-5p	XLOC_062719	-0.879786	0.0208086	ENSOCUG00000009108		-0.875878	0.0221532
ocu-miR-185-5p	XLOC_063297	-0.840278	0.0362294	ENSOCUG00000014832	STEAP2	-0.821762	0.0448219
ocu-miR-185-5p	XLOC_062719	-0.879786	0.0208086	ENSOCUG00000014832		-0.821762	0.0448219
ocu-miR-96-5p	XLOC_054118	-0.812316	0.0495325	ENSOCUG00000009322	MCOLN2	-0.828594	0.0415519
ocu-miR-96-5p	XLOC_030217	-0.857706	0.0289308	ENSOCUG00000009322		-0.828594	0.0415519
ocu-miR-204-5p	XLOC_061964	-0.860636	0.0277801	ENSOCUG00000006357	-	-0.872654	0.0232931
ocu-miR-204-5p	XLOC_054118	-0.913541	0.0108897	ENSOCUG00000006357		-0.872654	0.0232931
ocu-miR-204-5p	XLOC_063297	-0.898848	0.0148302	ENSOCUG00000006357		-0.872654	0.0232931
ocu-miR-204-5p	XLOC_042760	-0.827467	0.0420834	ENSOCUG00000006357		-0.872654	0.0232931
ocu-miR-7a-5p	XLOC_054118	-0.826394	0.0425923	ENSOCUG00000017338	EDIL3	-0.88406	0.0193839
ocu-miR-7a-5p	XLOC_054413	-0.829853	0.040962	ENSOCUG00000017338		-0.88406	0.0193839
ocu-miR-185-5p	XLOC_063297	-0.840278	0.0362294	ENSOCUG00000017338		-0.829341	0.0412016
ocu-miR-185-5p	XLOC_062719	-0.879786	0.0208086	ENSOCUG00000017338		-0.829341	0.0412016
ocu-miR-204-5p	XLOC_061964	-0.860636	0.0277801	ENSOCUG00000001035	ADAMTS2	-0.900936	0.0142344
ocu-miR-204-5p	XLOC_054118	-0.913541	0.0108897	ENSOCUG00000001035		-0.900936	0.0142344
ocu-miR-204-5p	XLOC_063297	-0.898848	0.0148302	ENSOCUG00000001035		-0.900936	0.0142344
ocu-miR-204-5p	XLOC_042760	-0.827467	0.0420834	ENSOCUG00000001035		-0.900936	0.0142344
ocu-miR-204-5p	XLOC_061964	-0.860636	0.0277801	ENSOCUG00000003209	CCBE1	-0.824257	0.0436144
ocu-miR-204-5p	XLOC_054118	-0.913541	0.0108897	ENSOCUG00000003209		-0.824257	0.0436144
ocu-miR-204-5p	XLOC_063297	-0.898848	0.0148302	ENSOCUG00000003209		-0.824257	0.0436144
ocu-miR-204-5p	XLOC_042760	-0.827467	0.0420834	ENSOCUG00000003209		-0.824257	0.0436144
ocu-miR-204-5p	XLOC_061964	-0.860636	0.0277801	ENSOCUG00000001993	KLHL13	-0.824124	0.0436783
ocu-miR-204-5p	XLOC_054118	-0.913541	0.0108897	ENSOCUG00000001993		-0.824124	0.0436783
ocu-miR-204-5p	XLOC_063297	-0.898848	0.0148302	ENSOCUG00000001993		-0.824124	0.0436783
ocu-miR-204-5p	XLOC_042760	-0.827467	0.0420834	ENSOCUG00000001993		-0.824124	0.0436783
ocu-miR-185-5p	XLOC_063297	-0.840278	0.0362294	ENSOCUG00000003323	ARHGAP28	-0.841541	0.0356747
ocu-miR-185-5p	XLOC_062719	-0.879786	0.0208086	ENSOCUG00000003323		-0.841541	0.0356747
ocu-miR-204-5p	XLOC_061964	-0.860636	0.0277801	ENSOCUG00000011609	BCL2A1	-0.948714	0.00387791
ocu-miR-204-5p	XLOC_054118	-0.913541	0.0108897	ENSOCUG00000011609		-0.948714	0.00387791
ocu-miR-204-5p	XLOC_063297	-0.898848	0.0148302	ENSOCUG00000011609		-0.948714	0.00387791
ocu-miR-204-5p	XLOC_042760	-0.827467	0.0420834	ENSOCUG00000011609		-0.948714	0.00387791
ocu-miR-7a-5p	XLOC_054118	-0.826394	0.0425923	ENSOCUG00000017891	SLC29A1	-0.872356	0.0233995
ocu-miR-7a-5p	XLOC_054413	-0.829853	0.040962	ENSOCUG00000017891		-0.872356	0.0233995
ocu-miR-204-5p	XLOC_061964	-0.860636	0.0277801	ENSOCUG00000016268	RCN1	-0.837791	0.0373335
ocu-miR-204-5p	XLOC_054118	-0.913541	0.0108897	ENSOCUG00000016268		-0.837791	0.0373335
ocu-miR-204-5p	XLOC_063297	-0.898848	0.0148302	ENSOCUG00000016268		-0.837791	0.0373335
ocu-miR-204-5p	XLOC_042760	-0.827467	0.0420834	ENSOCUG00000016268		-0.837791	0.0373335
ocu-miR-204-5p	XLOC_061964	-0.860636	0.0277801	ENSOCUG00000009582	CLEC5A	-0.890084	0.0174583
ocu-miR-204-5p	XLOC_054118	-0.913541	0.0108897	ENSOCUG00000009582		-0.890084	0.0174583
ocu-miR-204-5p	XLOC_063297	-0.898848	0.0148302	ENSOCUG00000009582		-0.890084	0.0174583
ocu-miR-204-5p	XLOC_042760	-0.827467	0.0420834	ENSOCUG00000009582		-0.890084	0.0174583
ocu-miR-96-5p	XLOC_054118	-0.812316	0.0495325	ENSOCUG00000003594	OLFML2B	-0.959268	0.00245485
ocu-miR-96-5p	XLOC_030217	-0.857706	0.0289308	ENSOCUG00000003594		-0.959268	0.00245485
ocu-miR-185-5p	XLOC_063297	-0.840278	0.0362294	ENSOCUG00000012459	FHL3	-0.851236	0.0315501
ocu-miR-185-5p	XLOC_062719	-0.879786	0.0208086	ENSOCUG00000012459		-0.851236	0.0315501
ocu-miR-204-5p	XLOC_061964	-0.860636	0.0277801	ENSOCUG00000009504	CD80	-0.935313	0.00614119
ocu-miR-204-5p	XLOC_054118	-0.913541	0.0108897	ENSOCUG00000009504		-0.935313	0.00614119
ocu-miR-204-5p	XLOC_063297	-0.898848	0.0148302	ENSOCUG00000009504		-0.935313	0.00614119
ocu-miR-204-5p	XLOC_042760	-0.827467	0.0420834	ENSOCUG00000009504		-0.935313	0.00614119
ocu-miR-204-5p	XLOC_061964	-0.860636	0.0277801	ENSOCUG00000016963	GNPDA1	-0.816258	0.04754
ocu-miR-204-5p	XLOC_054118	-0.913541	0.0108897	ENSOCUG00000016963		-0.816258	0.04754
ocu-miR-96-5p	XLOC_054118	-0.812316	0.0495325	ENSOCUG00000016963		-0.84739	0.0331577
ocu-miR-204-5p	XLOC_063297	-0.898848	0.0148302	ENSOCUG00000016963		-0.816258	0.04754
ocu-miR-204-5p	XLOC_042760	-0.827467	0.0420834	ENSOCUG00000016963		-0.816258	0.04754
ocu-miR-96-5p	XLOC_030217	-0.857706	0.0289308	ENSOCUG00000016963		-0.84739	0.0331577
ocu-miR-7a-5p	XLOC_054118	-0.826394	0.0425923	ENSOCUG00000001177	-	-0.827813	0.0419199
ocu-miR-7a-5p	XLOC_054413	-0.829853	0.040962	ENSOCUG00000001177		-0.827813	0.0419199
ocu-miR-96-5p	XLOC_054118	-0.812316	0.0495325	ENSOCUG00000014812	CD93	-0.852505	0.0310278
ocu-miR-185-5p	XLOC_063297	-0.840278	0.0362294	ENSOCUG00000014812		-0.918652	0.00965706
ocu-miR-185-5p	XLOC_062719	-0.879786	0.0208086	ENSOCUG00000014812		-0.918652	0.00965706
ocu-miR-96-5p	XLOC_030217	-0.857706	0.0289308	ENSOCUG00000014812		-0.852505	0.0310278
ocu-miR-204-5p	XLOC_061964	-0.860636	0.0277801	ENSOCUG00000008587	TNFSF4	-0.927533	0.00768697
ocu-miR-204-5p	XLOC_054118	-0.913541	0.0108897	ENSOCUG00000008587		-0.927533	0.00768697
ocu-miR-7a-5p	XLOC_054118	-0.826394	0.0425923	ENSOCUG00000008587		-0.831847	0.0400357
ocu-miR-7a-5p	XLOC_054413	-0.829853	0.040962	ENSOCUG00000008587		-0.831847	0.0400357
ocu-miR-204-5p	XLOC_063297	-0.898848	0.0148302	ENSOCUG00000008587		-0.927533	0.00768697
ocu-miR-204-5p	XLOC_042760	-0.827467	0.0420834	ENSOCUG00000008587		-0.927533	0.00768697
ocu-miR-7a-5p	XLOC_054118	-0.826394	0.0425923	ENSOCUG00000002898	FBLN7	-0.834143	0.0389814
ocu-miR-7a-5p	XLOC_054413	-0.829853	0.040962	ENSOCUG00000002898		-0.834143	0.0389814
ocu-miR-96-5p	XLOC_054118	-0.812316	0.0495325	ENSOCUG00000001685	SLC7A8	-0.831068	0.0403967
ocu-miR-96-5p	XLOC_030217	-0.857706	0.0289308	ENSOCUG00000001685		-0.831068	0.0403967
ocu-miR-96-5p	XLOC_054118	-0.812316	0.0495325	ENSOCUG00000012696	PAFAH2	-0.86429	0.0263762
ocu-miR-96-5p	XLOC_030217	-0.857706	0.0289308	ENSOCUG00000012696		-0.86429	0.0263762
ocu-miR-96-5p	XLOC_054118	-0.812316	0.0495325	ENSOCUG00000003978	SPECC1	-0.859209	0.0283377
ocu-miR-185-5p	XLOC_063297	-0.840278	0.0362294	ENSOCUG00000003978		-0.856767	0.0293044
ocu-miR-185-5p	XLOC_062719	-0.879786	0.0208086	ENSOCUG00000003978		-0.856767	0.0293044
ocu-miR-96-5p	XLOC_030217	-0.857706	0.0289308	ENSOCUG00000003978		-0.859209	0.0283377
ocu-miR-204-5p	XLOC_061964	-0.860636	0.0277801	ENSOCUG00000002259	MPZL1	-0.923484	0.00855797
ocu-miR-204-5p	XLOC_054118	-0.913541	0.0108897	ENSOCUG00000002259		-0.923484	0.00855797
ocu-miR-204-5p	XLOC_063297	-0.898848	0.0148302	ENSOCUG00000002259		-0.923484	0.00855797
ocu-miR-204-5p	XLOC_042760	-0.827467	0.0420834	ENSOCUG00000002259		-0.923484	0.00855797
ocu-miR-7a-5p	XLOC_054118	-0.826394	0.0425923	ENSOCUG00000002945	MEOX1	-0.837154	0.0376192
ocu-miR-7a-5p	XLOC_054413	-0.829853	0.040962	ENSOCUG00000002945		-0.837154	0.0376192
ocu-miR-185-5p	XLOC_063297	-0.840278	0.0362294	ENSOCUG00000009195	CLEC4E	-0.844279	0.0344856
ocu-miR-185-5p	XLOC_062719	-0.879786	0.0208086	ENSOCUG00000009195		-0.844279	0.0344856
ocu-miR-185-5p	XLOC_063297	-0.840278	0.0362294	ENSOCUG00000001250	ednrA	-0.859795	0.0281079
ocu-miR-185-5p	XLOC_062719	-0.879786	0.0208086	ENSOCUG00000001250		-0.859795	0.0281079
ocu-miR-185-5p	XLOC_063297	-0.840278	0.0362294	ENSOCUG00000013478	HTRA1	-0.888271	0.0180276
ocu-miR-185-5p	XLOC_062719	-0.879786	0.0208086	ENSOCUG00000013478		-0.888271	0.0180276
ocu-miR-204-5p	XLOC_061964	-0.860636	0.0277801	ENSOCUG00000004627	APH1B	-0.835137	0.0385293
ocu-miR-204-5p	XLOC_054118	-0.913541	0.0108897	ENSOCUG00000004627		-0.835137	0.0385293
ocu-miR-204-5p	XLOC_063297	-0.898848	0.0148302	ENSOCUG00000004627		-0.835137	0.0385293
ocu-miR-204-5p	XLOC_042760	-0.827467	0.0420834	ENSOCUG00000004627		-0.835137	0.0385293
ocu-miR-204-5p	XLOC_061964	-0.860636	0.0277801	ENSOCUG00000015495	PRDM1	-0.81202	0.0496835
ocu-miR-204-5p	XLOC_054118	-0.913541	0.0108897	ENSOCUG00000015495		-0.81202	0.0496835
ocu-miR-204-5p	XLOC_063297	-0.898848	0.0148302	ENSOCUG00000015495		-0.81202	0.0496835
ocu-miR-204-5p	XLOC_042760	-0.827467	0.0420834	ENSOCUG00000015495		-0.81202	0.0496835
ocu-miR-185-5p	XLOC_063297	-0.840278	0.0362294	ENSOCUG00000020975	CSTB	-0.901105	0.0141867
ocu-miR-185-5p	XLOC_062719	-0.879786	0.0208086	ENSOCUG00000020975		-0.901105	0.0141867
ocu-miR-7a-5p	XLOC_054118	-0.826394	0.0425923	ENSOCUG00000010544	CROT	-0.838117	0.0371879
ocu-miR-7a-5p	XLOC_054413	-0.829853	0.040962	ENSOCUG00000010544		-0.838117	0.0371879
ocu-miR-7a-5p	XLOC_054118	-0.826394	0.0425923	ENSOCUG00000002887	FRMD4B	-0.889252	0.0177186
ocu-miR-7a-5p	XLOC_054413	-0.829853	0.040962	ENSOCUG00000002887		-0.889252	0.0177186
ocu-miR-204-5p	XLOC_061964	-0.860636	0.0277801	ENSOCUG00000017542	BASP1	-0.926917	0.00781649
ocu-miR-204-5p	XLOC_054118	-0.913541	0.0108897	ENSOCUG00000017542		-0.926917	0.00781649
ocu-miR-96-5p	XLOC_054118	-0.812316	0.0495325	ENSOCUG00000017542		-0.827295	0.0421649
ocu-miR-204-5p	XLOC_063297	-0.898848	0.0148302	ENSOCUG00000017542		-0.926917	0.00781649
ocu-miR-185-5p	XLOC_063297	-0.840278	0.0362294	ENSOCUG00000017542		-0.835602	0.0383187
ocu-miR-185-5p	XLOC_062719	-0.879786	0.0208086	ENSOCUG00000017542		-0.835602	0.0383187
ocu-miR-204-5p	XLOC_042760	-0.827467	0.0420834	ENSOCUG00000017542		-0.926917	0.00781649
ocu-miR-96-5p	XLOC_030217	-0.857706	0.0289308	ENSOCUG00000017542		-0.827295	0.0421649
ocu-miR-185-5p	XLOC_063297	-0.840278	0.0362294	ENSOCUG00000001879	SPAG1	-0.841838	0.0355446
ocu-miR-185-5p	XLOC_062719	-0.879786	0.0208086	ENSOCUG00000001879		-0.841838	0.0355446
ocu-miR-96-5p	XLOC_054118	-0.812316	0.0495325	ENSOCUG00000002341	CAPG	-0.835221	0.0384911
ocu-miR-96-5p	XLOC_030217	-0.857706	0.0289308	ENSOCUG00000002341		-0.835221	0.0384911
ocu-miR-7a-5p	XLOC_054118	-0.826394	0.0425923	ENSOCUG00000009352	TCN2	-0.857313	0.029087
ocu-miR-7a-5p	XLOC_054413	-0.829853	0.040962	ENSOCUG00000009352		-0.857313	0.029087
ocu-miR-7a-5p	XLOC_054118	-0.826394	0.0425923	ENSOCUG00000023681	TSPAN18	-0.839574	0.0365405
ocu-miR-96-5p	XLOC_054118	-0.812316	0.0495325	ENSOCUG00000023681		-0.87117	0.0238267
ocu-miR-7a-5p	XLOC_054413	-0.829853	0.040962	ENSOCUG00000023681		-0.839574	0.0365405
ocu-miR-185-5p	XLOC_063297	-0.840278	0.0362294	ENSOCUG00000023681		-0.814022	0.0486653
ocu-miR-185-5p	XLOC_062719	-0.879786	0.0208086	ENSOCUG00000023681		-0.814022	0.0486653
ocu-miR-96-5p	XLOC_030217	-0.857706	0.0289308	ENSOCUG00000023681		-0.87117	0.0238267
ocu-miR-185-5p	XLOC_063297	-0.840278	0.0362294	ENSOCUG00000025012	ANGPT4	-0.823892	0.04379
ocu-miR-185-5p	XLOC_062719	-0.879786	0.0208086	ENSOCUG00000025012		-0.823892	0.04379
ocu-miR-204-5p	XLOC_061964	-0.860636	0.0277801	ENSOCUG00000024755	TYROBP	-0.897564	0.0152022
ocu-miR-204-5p	XLOC_054118	-0.913541	0.0108897	ENSOCUG00000024755		-0.897564	0.0152022
ocu-miR-204-5p	XLOC_063297	-0.898848	0.0148302	ENSOCUG00000024755		-0.897564	0.0152022
ocu-miR-204-5p	XLOC_042760	-0.827467	0.0420834	ENSOCUG00000024755		-0.897564	0.0152022
ocu-miR-185-5p	XLOC_063297	-0.840278	0.0362294	ENSOCUG00000025192	COL6A1	-0.816243	0.0475473
ocu-miR-185-5p	XLOC_062719	-0.879786	0.0208086	ENSOCUG00000025192		-0.816243	0.0475473
ocu-miR-183-5p	XLOC_030217	-0.836928	0.0377203	ENSOCUG00000021808	TMED3	-0.831056	0.0404021
ocu-miR-183-5p	XLOC_030217	-0.836928	0.0377203	ENSOCUG00000010337	DOCK4	-0.826276	0.0426485
ocu-miR-204-5p	XLOC_061964	-0.860636	0.0277801	ENSOCUG00000004941	ZKSCAN7	-0.891827	0.0169191
ocu-miR-204-5p	XLOC_054118	-0.913541	0.0108897	ENSOCUG00000004941		-0.891827	0.0169191
ocu-miR-7a-5p	XLOC_054118	-0.826394	0.0425923	ENSOCUG00000004941		-0.822096	0.0446596
ocu-miR-7a-5p	XLOC_054413	-0.829853	0.040962	ENSOCUG00000004941		-0.822096	0.0446596
ocu-miR-204-5p	XLOC_063297	-0.898848	0.0148302	ENSOCUG00000004941		-0.891827	0.0169191
ocu-miR-204-5p	XLOC_042760	-0.827467	0.0420834	ENSOCUG00000004941		-0.891827	0.0169191
ocu-miR-204-5p	XLOC_061964	-0.860636	0.0277801	ENSOCUG00000016531	-	-0.906806	0.012623
ocu-miR-204-5p	XLOC_054118	-0.913541	0.0108897	ENSOCUG00000016531		-0.906806	0.012623
ocu-miR-204-5p	XLOC_063297	-0.898848	0.0148302	ENSOCUG00000016531		-0.906806	0.012623
ocu-miR-204-5p	XLOC_042760	-0.827467	0.0420834	ENSOCUG00000016531		-0.906806	0.012623
ocu-miR-204-5p	XLOC_061964	-0.860636	0.0277801	ENSOCUG00000003186	HPRT	-0.911592	0.0113785
ocu-miR-204-5p	XLOC_054118	-0.913541	0.0108897	ENSOCUG00000003186		-0.911592	0.0113785
ocu-miR-204-5p	XLOC_063297	-0.898848	0.0148302	ENSOCUG00000003186		-0.911592	0.0113785
ocu-miR-204-5p	XLOC_042760	-0.827467	0.0420834	ENSOCUG00000003186		-0.911592	0.0113785
